# Supplementary material for: The evolutionary lifecycle of ribosome hibernation factors
Source: bioRxiv preprint, doi:10.1101/2025.11.04.686544, version 2 (2025-11-05)
Supplement: Supplementary Table 1 [file 686544_file03.xlsx]

## Sheet: Bacterial genomes analyzed
Accession ID	HPF_homolog_presence	Phylum	Class	Order	Family	Genus	Species	Domain	genome_size	gc_percentage	HPF	RaiA	RMF	Sra	HPF-Csp fusion	mas_aa_len_HPF	mas_aa_len_RaiA	mas_aa_len_RMF	mas_aa_len_SRA	mas_aa_len_HPF-Csp
RS_GCF_000657795.2	TRUE	p__Pseudomonadota	c__Gammaproteobacteria	o__Burkholderiales	f__Burkholderiaceae	g__Bordetella	s__Bordetella pseudohinzii	d__Bacteria	4538520	66.5598	1	0	0	0	0	112	0	0	0	0
RS_GCF_000019185.1	TRUE	p__Pseudomonadota	c__Gammaproteobacteria	o__Enterobacterales	f__Shewanellaceae	g__Shewanella	s__Shewanella halifaxensis	d__Bacteria	5226917	44.5909	1	3	0	0	0	95	122	0	0	0
RS_GCF_004570605.1	TRUE	p__Bacillota	c__Bacilli	o__Lactobacillales	f__Aerococcaceae	g__WM01	s__WM01 sp004570605	d__Bacteria	2027228	33.182	1	0	0	0	0	182	0	0	0	0
RS_GCF_002245655.1	TRUE	p__Pseudomonadota	c__Gammaproteobacteria	o__Burkholderiales	f__Rhodocyclaceae	g__Thauera	s__Thauera propionica	d__Bacteria	3929604	65.8635	2	0	0	0	0	114	0	0	0	0
RS_GCF_016863255.1	TRUE	p__Actinomycetota	c__Actinomycetes	o__Mycobacteriales	f__Micromonosporaceae	g__Planosporangium	s__Planosporangium mesophilum	d__Bacteria	6625602	70.9836	1	0	0	0	0	220	0	0	0	0
RS_GCF_010645065.1	TRUE	p__Bacteroidota	c__Bacteroidia	o__Flavobacteriales	f__Flavobacteriaceae	g__Flavobacterium	s__Flavobacterium fluviatile	d__Bacteria	5114933	34.9845	1	0	0	0	0	121	0	0	0	0
GB_GCA_027013865.1	TRUE	p__Myxococcota	c__Polyangia	o__HGW-17	f__JALWFW01	g__JALWFW01	s__JALWFW01 sp027013865	d__Bacteria	3378949	53.673	1	0	0	0	0	191	0	0	0	0
GB_GCA_003862155.1	TRUE	p__Bacillota_A	c__Clostridia	o__Lachnospirales	f__Lachnospiraceae	g__Weimeria	s__Weimeria bifida	d__Bacteria	2106912	45.7234	1	0	0	0	0	180	0	0	0	0
GB_GCA_028687495.1	TRUE	p__Patescibacteria	c__Paceibacteria	o__Paceibacterales	f__RBG-13-42-11	g__JAQUAA01	s__JAQUAA01 sp028687495	d__Bacteria	546522	42.5601	1	0	0	0	0	135	0	0	0	0
GB_GCA_025449695.1	TRUE	p__Patescibacteria	c__Paceibacteria	o__UBA6257	f__2-01-FULL-56-20	g__JANWIW01	s__JANWIW01 sp025449695	d__Bacteria	983527	58.3792	1	0	0	0	0	103	0	0	0	0
GB_GCA_001899285.1	FALSE	p__Pseudomonadota	c__Alphaproteobacteria	o__Rhizobiales	f__Xanthobacteraceae	g__Pseudolabrys	s__Pseudolabrys sp001899285	d__Bacteria	4627262	64.1507	0	0	0	0	0	0	0	0	0	0
RS_GCF_009856625.1	TRUE	p__Pseudomonadota	c__Gammaproteobacteria	o__Burkholderiales	f__Chromobacteriaceae	g__Aquitalea	s__Aquitalea denitrificans	d__Bacteria	4502301	58.8154	1	0	0	0	0	107	0	0	0	0
GB_GCA_021805865.1	TRUE	p__Pseudomonadota	c__Gammaproteobacteria	o__Steroidobacterales	f__Steroidobacteraceae	g__13-2-20CM-66-19	s__13-2-20CM-66-19 sp021805865	d__Bacteria	4685882	66.5677	1	0	0	0	0	109	0	0	0	0
RS_GCF_000385175.1	TRUE	p__Bacillota	c__Bacilli	o__Staphylococcales	f__Salinicoccaceae	g__Salinicoccus	s__Salinicoccus albus	d__Bacteria	2639352	43.8804	1	0	0	0	0	191	0	0	0	0
RS_GCF_000176175.1	TRUE	p__Pseudomonadota	c__Gammaproteobacteria	o__Enterobacterales	f__Vibrionaceae	g__Vibrio	s__Vibrio furnissii	d__Bacteria	4958664	50.6036	1	1	1	0	0	95	109	57	0	0
GB_GCA_026706385.1	TRUE	p__Pseudomonadota	c__Gammaproteobacteria	o__Pseudomonadales	f__Azotimanducaceae_A	g__VXYL01	s__VXYL01 sp026706385	d__Bacteria	5106142	66.696	1	0	0	0	0	98	0	0	0	0
GB_GCA_002406055.1	TRUE	p__Spirochaetota	c__Spirochaetia	o__Sphaerochaetales	f__Sphaerochaetaceae	g__Ornithospirochaeta	s__Ornithospirochaeta sp002406055	d__Bacteria	1960098	35.5638	1	0	0	0	0	98	0	0	0	0
RS_GCF_001527685.1	TRUE	p__Pseudomonadota	c__Gammaproteobacteria	o__Burkholderiales	f__Burkholderiaceae	g__Burkholderia	s__Burkholderia pyrrocinia_D	d__Bacteria	8256860	67.2936	1	0	0	0	0	122	0	0	0	0
GB_GCA_937877125.1	TRUE	p__Patescibacteria	c__CALEFQ01	o__CALEFQ01	f__CALEFQ01	g__CALEFQ01	s__CALEFQ01 sp937877125	d__Bacteria	1094519	49.4599	1	0	0	0	0	185	0	0	0	0
RS_GCF_030161575.1	TRUE	p__Actinomycetota	c__Actinomycetes	o__Actinomycetales	f__Microbacteriaceae	g__Arenivirga	s__Arenivirga flava	d__Bacteria	3245598	71.9818	1	0	0	0	0	226	0	0	0	0
RS_GCF_020782245.1	TRUE	p__Pseudomonadota	c__Alphaproteobacteria	o__Sphingomonadales	f__Sphingomonadaceae	g__Sphingobium	s__Sphingobium soli	d__Bacteria	4053590	63.3756	1	0	0	0	0	197	0	0	0	0
RS_GCF_003946505.1	TRUE	p__Bacillota	c__Bacilli	o__Lactobacillales	f__Lactobacillaceae	g__Companilactobacillus	s__Companilactobacillus mishanensis	d__Bacteria	2348649	36.6185	1	0	0	0	0	182	0	0	0	0
RS_GCF_000738175.1	TRUE	p__Actinomycetota	c__Actinomycetes	o__Mycobacteriales	f__Mycobacteriaceae	g__Corynebacterium	s__Corynebacterium jeikeium_C	d__Bacteria	2423808	62.3592	1	0	0	0	0	234	0	0	0	0
RS_GCF_000023065.1	TRUE	p__Pseudomonadota	c__Gammaproteobacteria	o__Enterobacterales	f__Aeromonadaceae	g__Tolumonas	s__Tolumonas auensis	d__Bacteria	3471292	49.027	1	1	1	0	0	95	110	58	0	0
RS_GCF_022012295.1	TRUE	p__Pseudomonadota	c__Gammaproteobacteria	o__Burkholderiales	f__Rhodocyclaceae	g__Azonexus	s__Azonexus hankyongensis	d__Bacteria	4095330	62.9167	1	0	0	0	0	107	0	0	0	0
RS_GCF_013912005.1	TRUE	p__Pseudomonadota	c__Alphaproteobacteria	o__Caulobacterales	f__Caulobacteraceae	g__Brevundimonas	s__Brevundimonas sp013912005	d__Bacteria	2887456	71.5859	1	0	0	0	0	221	0	0	0	0
GB_GCA_018821925.1	TRUE	p__Edwardsbacteria	c__AC1	o__AC1	f__EtOH8	g__UBA2226	s__UBA2226 sp018821925	d__Bacteria	2439872	52.6328	1	0	0	0	0	106	0	0	0	0
GB_GCA_013177895.1	TRUE	p__Spirochaetota	c__Brevinematia	o__Brevinematales	f__GWF1-51-8	g__GWF1-51-8	s__GWF1-51-8 sp013177895	d__Bacteria	3604168	49.57	1	0	0	0	0	102	0	0	0	0
GB_GCA_019912385.1	TRUE	p__Pseudomonadota	c__Alphaproteobacteria	o__Rhizobiales	f__Rhizobiaceae	g__Zhengella	s__Zhengella sp019912385	d__Bacteria	4237884	63.1831	1	0	0	0	0	193	0	0	0	0
GB_GCA_016218495.1	TRUE	p__Elusimicrobiota	c__Elusimicrobia	o__UBA1565	f__UBA1565	g__SCTT01	s__SCTT01 sp016218495	d__Bacteria	4149176	70.1349	1	0	0	0	0	177	0	0	0	0
GB_GCA_016207275.1	TRUE	p__Patescibacteria	c__ABY1	o__SBBC01	f__SBBC01	g__JACQPY01	s__JACQPY01 sp016207275	d__Bacteria	952436	57.4392	1	0	0	0	0	100	0	0	0	0
GB_GCA_009777575.1	TRUE	p__Cloacimonadota	c__Cloacimonadia	o__Cloacimonadales	f__WRIO01	g__WRLO01	s__WRLO01 sp009777575	d__Bacteria	3755968	34.0126	1	0	0	0	0	177	0	0	0	0
RS_GCF_018324685.1	TRUE	p__Actinomycetota	c__Actinomycetes	o__Mycobacteriales	f__Micromonosporaceae	g__Actinocatenispora	s__Actinocatenispora sera	d__Bacteria	7044238	72.6283	1	0	0	0	0	203	0	0	0	0
RS_GCF_001999985.1	FALSE	p__Campylobacterota	c__Campylobacteria	o__Campylobacterales	f__Helicobacteraceae	g__Helicobacter_A	s__Helicobacter_A rappini	d__Bacteria	2620399	34.7758	0	0	0	0	0	0	0	0	0	0
RS_GCF_002934065.1	TRUE	p__Pseudomonadota	c__Gammaproteobacteria	o__Pseudomonadales	f__Pseudomonadaceae	g__Pseudomonas_E	s__Pseudomonas_E orientalis_A	d__Bacteria	5986236	60.3741	1	0	0	0	0	101	0	0	0	0
RS_GCF_006489205.2	TRUE	p__Actinomycetota	c__Actinomycetes	o__Actinomycetales	f__Brevibacteriaceae	g__Brevibacterium	s__Brevibacterium sp006489205	d__Bacteria	4032593	68.0138	1	0	0	0	0	226	0	0	0	0
GB_GCA_003695725.1	TRUE	p__Schekmanbacteria	c__GWA2-38-11	o__GWA2-38-11	f__J061	g__J061	s__J061 sp003695725	d__Bacteria	2771721	36.5837	1	0	0	0	0	113	0	0	0	0
RS_GCF_016495865.1	TRUE	p__Bacillota	c__Bacilli	o__Bacillales_H	f__Marinococcaceae	g__Salicibibacter	s__Salicibibacter cibi	d__Bacteria	3814380	44.9194	1	0	0	0	0	188	0	0	0	0
GB_GCA_937913075.1	TRUE	p__Bacillota_A	c__Clostridia	o__Christensenellales	f__CAG-138	g__UBA3857	s__UBA3857 sp937913075	d__Bacteria	1893238	54.142	1	0	0	0	0	172	0	0	0	0
GB_GCA_015490835.1	TRUE	p__Bacteroidota	c__Bacteroidia	o__Flavobacteriales	f__Flavobacteriaceae	g__GCA-002733185	s__GCA-002733185 sp015490835	d__Bacteria	2773629	33.9959	1	0	0	0	0	83	0	0	0	0
GB_GCA_001683985.1	TRUE	p__Desulfobacterota	c__Syntrophia	o__Syntrophales	f__Smithellaceae	g__Smithella	s__Smithella sp001683985	d__Bacteria	2753163	42.8349	1	0	0	0	0	177	0	0	0	0
GB_GCA_019114445.1	TRUE	p__Bacteroidota	c__Bacteroidia	o__Bacteroidales	f__Barnesiellaceae	g__Barnesiella	s__Barnesiella excrementigallinarum	d__Bacteria	2611671	47.0362	1	0	0	0	0	100	0	0	0	0
RS_GCF_000429405.1	TRUE	p__Bacteroidota	c__Bacteroidia	o__Cytophagales	f__Cyclobacteriaceae	g__Algoriphagus	s__Algoriphagus marincola	d__Bacteria	4431678	41.9158	1	0	0	0	0	101	0	0	0	0
RS_GCF_004337705.1	TRUE	p__Actinomycetota	c__Rubrobacteria	o__Rubrobacterales	f__Rubrobacteraceae	g__Rubrobacter_C	s__Rubrobacter_C taiwanensis	d__Bacteria	3035128	67.179	1	0	0	0	0	186	0	0	0	0
RS_GCF_001438705.1	TRUE	p__Bacillota	c__Bacilli	o__Lactobacillales	f__Lactobacillaceae	g__Weissella	s__Weissella kandleri	d__Bacteria	1334438	39.6706	1	0	0	0	0	181	0	0	0	0
GB_GCA_949948835.1	TRUE	p__Bacillota_A	c__Clostridia	o__TANB77	f__CAG-508	g__RGIG8482	s__RGIG8482 sp949948835	d__Bacteria	1512887	29.723	1	0	0	0	0	176	0	0	0	0
RS_GCF_026913205.1	TRUE	p__Bacillota	c__Bacilli	o__Lactobacillales	f__Lactobacillaceae	g__Lentilactobacillus	s__Lentilactobacillus sp026913205	d__Bacteria	1904115	37.6335	1	0	0	0	0	190	0	0	0	0
RS_GCF_028598555.1	TRUE	p__Pseudomonadota	c__Gammaproteobacteria	o__Enterobacterales	f__Enterobacteriaceae	g__Xenorhabdus	s__Xenorhabdus anantnagensis	d__Bacteria	4318764	42.8817	1	1	0	0	0	95	110	0	0	0
RS_GCF_022678645.1	TRUE	p__Actinomycetota	c__Actinomycetes	o__Mycobacteriales	f__Pseudonocardiaceae	g__Saccharopolyspora	s__Saccharopolyspora soli	d__Bacteria	9354073	68.3335	1	0	0	0	0	225	0	0	0	0
RS_GCF_023516455.1	TRUE	p__Pseudomonadota	c__Alphaproteobacteria	o__Sphingomonadales	f__Sphingomonadaceae	g__Sphingomicrobium	s__Sphingomicrobium caseinilyticus	d__Bacteria	2778408	62.4687	1	0	0	0	0	189	0	0	0	0
RS_GCF_013359755.1	TRUE	p__Pseudomonadota	c__Alphaproteobacteria	o__Rhizobiales	f__Xanthobacteraceae	g__Tardiphaga	s__Tardiphaga robiniae	d__Bacteria	6318076	61.5076	1	0	0	0	0	201	0	0	0	0
RS_GCF_001183985.1	TRUE	p__Bacillota	c__Bacilli	o__Bacillales_B	f__DSM-1321	g__Peribacillus	s__Peribacillus loiseleuriae	d__Bacteria	5428425	37.5461	1	0	0	0	0	184	0	0	0	0
RS_GCF_002802875.1	TRUE	p__Actinomycetota	c__Actinomycetes	o__Actinomycetales	f__Bifidobacteriaceae	g__Galliscardovia	s__Galliscardovia primatium	d__Bacteria	2696768	63.1961	1	0	0	0	0	220	0	0	0	0
GB_GCA_025062245.1	TRUE	p__Desulfobacterota	c__Thermodesulfobacteria	o__Thermodesulfobacteriales	f__Thermodesulfobacteriaceae	g__Thermodesulfobacterium	s__Thermodesulfobacterium sp025062245	d__Bacteria	1627487	33.3626	1	0	0	0	0	168	0	0	0	0
GB_GCA_028281235.1	FALSE	p__Pseudomonadota	c__Alphaproteobacteria	o__Rhizobiales	f__Afifellaceae	g__Faunimonas	s__Faunimonas sp028281235	d__Bacteria	4404853	63.8754	0	0	0	0	0	0	0	0	0	0
GB_GCA_023151315.1	TRUE	p__Bacteroidota	c__Bacteroidia	o__Palsa-965	f__Palsa-965	g__GCA-2737665	s__GCA-2737665 sp023151315	d__Bacteria	4276570	44.2905	1	0	0	0	0	99	0	0	0	0
RS_GCF_007896845.1	TRUE	p__Bacteroidota	c__Bacteroidia	o__Chitinophagales	f__Chitinophagaceae	g__Chitinophaga	s__Chitinophaga pinensis_C	d__Bacteria	7098899	45.0112	1	0	0	0	0	99	0	0	0	0
GB_GCA_900546285.1	TRUE	p__Bacillota_I	c__Bacilli_A	o__Erysipelotrichales	f__Erysipelotrichaceae	g__UBA636	s__UBA636 sp900546285	d__Bacteria	1910878	32.5212	1	0	0	0	0	173	0	0	0	0
GB_GCA_002687175.1	FALSE	p__Patescibacteria	c__ABY1	o__Buchananbacterales	f__UBA6539	g__UBA6539	s__UBA6539 sp002687175	d__Bacteria	1116120	36.6935	0	0	0	0	0	0	0	0	0	0
RS_GCF_001685025.1	TRUE	p__Bacillota	c__Bacilli	o__Bacillales_B	f__DSM-18226	g__Bacillus_D	s__Bacillus_D sp001685025	d__Bacteria	5166106	42.59	1	0	0	0	0	183	0	0	0	0
RS_GCF_001908205.1	TRUE	p__Pseudomonadota	c__Alphaproteobacteria	o__Rhizobiales	f__Xanthobacteraceae	g__Bradyrhizobium	s__Bradyrhizobium sp001908205	d__Bacteria	9235468	63.0568	1	0	0	0	0	200	0	0	0	0
RS_GCF_000820185.1	TRUE	p__Pseudomonadota	c__Gammaproteobacteria	o__Enterobacterales	f__Aeromonadaceae	g__Aeromonas	s__Aeromonas tecta	d__Bacteria	4755221	60.1138	1	1	0	0	0	95	114	0	0	0
RS_GCF_900106755.1	TRUE	p__Bacteroidota	c__Bacteroidia	o__Bacteroidales	f__Bacteroidaceae	g__Bacteroides	s__Bacteroides faecis	d__Bacteria	5959374	42.3996	1	0	0	0	0	99	0	0	0	0
GB_GCA_031317525.1	TRUE	p__Bacillota	c__Bacilli	o__Bacillales	f__Bacillaceae	g__Bacillus	s__Bacillus tequilensis	d__Bacteria	4009429	43.8533	1	0	0	0	0	189	0	0	0	0
RS_GCF_000443995.1	TRUE	p__Bdellovibrionota	c__Bacteriovoracia	o__Bacteriovoracales	f__Bacteriovoracaceae	g__Halobacteriovorax_A	s__Halobacteriovorax_A sp000443995	d__Bacteria	3233679	36.4661	1	0	0	0	0	121	0	0	0	0
GB_GCA_934149325.1	TRUE	p__Bacillota_I	c__Bacilli_A	o__RF39	f__UBA660	g__CAKPEJ01	s__CAKPEJ01 sp934149325	d__Bacteria	1089314	24.1668	1	0	0	0	0	175	0	0	0	0
GB_GCA_947258795.1	TRUE	p__Pseudomonadota	c__Gammaproteobacteria	o__DRJJ01	f__DRJJ01	g__DRJJ01	s__DRJJ01 sp947258795	d__Bacteria	3364770	51.8544	1	0	0	0	0	98	0	0	0	0
GB_GCA_913009875.1	TRUE	p__Pseudomonadota	c__Gammaproteobacteria	o__SZUA-152	f__SZUA-152	g__DRQN01	s__DRQN01 sp913009875	d__Bacteria	3556579	58.1597	1	0	0	0	0	110	0	0	0	0
RS_GCF_900103035.1	TRUE	p__Pseudomonadota	c__Gammaproteobacteria	o__Burkholderiales	f__Nitrosomonadaceae	g__Nitrosomonas	s__Nitrosomonas mobilis	d__Bacteria	3082864	48.5322	1	0	0	0	0	110	0	0	0	0
RS_GCF_001936575.1	TRUE	p__Bacteroidota	c__Bacteroidia	o__Flavobacteriales	f__Flavobacteriaceae	g__Tenacibaculum	s__Tenacibaculum agarivorans	d__Bacteria	5638422	30.8692	1	0	0	0	0	102	0	0	0	0
RS_GCF_000269905.1	TRUE	p__Bacillota	c__Bacilli	o__Bacillales_D	f__Alkalibacillaceae	g__Alkalibacillus	s__Alkalibacillus haloalkaliphilus_A	d__Bacteria	2908057	37.0793	1	0	0	0	0	185	0	0	0	0
RS_GCF_002874535.1	TRUE	p__Bacillota	c__Bacilli	o__Bacillales_B	f__DSM-18226	g__Mesobacillus	s__Mesobacillus jeotgali	d__Bacteria	4703554	42.17	1	0	0	0	0	181	0	0	0	0
RS_GCF_022008395.1	TRUE	p__Bacteroidota	c__Bacteroidia	o__Flavobacteriales	f__Flavobacteriaceae	g__Aequorivita	s__Aequorivita xiaoshiensis	d__Bacteria	3066048	34.5323	1	2	0	0	0	100	100	0	0	0
RS_GCF_025331195.1	TRUE	p__Actinomycetota	c__Actinomycetes	o__Mycobacteriales	f__Mycobacteriaceae	g__Mycobacterium	s__Mycobacterium llatzerense	d__Bacteria	6577636	66.3008	1	0	0	0	0	223	0	0	0	0
GB_GCA_018818885.1	TRUE	p__Patescibacteria	c__ABY1	o__Buchananbacterales	f__SURF-54	g__JAHIRB01	s__JAHIRB01 sp018818885	d__Bacteria	1353494	34.2098	1	0	0	0	0	99	0	0	0	0
GB_GCA_023229365.1	FALSE	p__Myxococcota	c__Polyangia	o__JAAYKL01	f__JAAYKL01	g__JALNZK01	s__JALNZK01 sp023229365	d__Bacteria	6248396	64.0675	0	0	0	0	0	0	0	0	0	0
RS_GCF_019711655.1	TRUE	p__Pseudomonadota	c__Alphaproteobacteria	o__Sphingomonadales	f__Sphingomonadaceae	g__Qipengyuania	s__Qipengyuania mesophila	d__Bacteria	3135996	64.9898	1	0	0	0	0	189	0	0	0	0
GB_GCA_025354985.1	TRUE	p__Chloroflexota	c__Anaerolineae	o__J036	f__Brachytrichaceae	g__AQU-03	s__AQU-03 sp025354985	d__Bacteria	4185093	56.3964	1	0	0	0	0	185	0	0	0	0
GB_GCA_018823885.1	FALSE	p__Patescibacteria	c__Microgenomatia	o__GWA2-44-7	f__UBA8517	g__JAHJHG01	s__JAHJHG01 sp018823885	d__Bacteria	756347	38.6265	0	0	0	0	0	0	0	0	0	0
GB_GCA_027717645.1	TRUE	p__Desulfobacterota_D	c__UBA1144	o__UBA2774	f__CSP1-2	g__JALLOG01	s__JALLOG01 sp027717645	d__Bacteria	3783034	38.9062	2	0	0	0	0	182	0	0	0	0
RS_GCF_023208195.1	TRUE	p__Actinomycetota	c__Actinomycetes	o__Propionibacteriales	f__Nocardioidaceae	g__Nocardioides	s__Nocardioides sp013815725	d__Bacteria	4524052	69.4248	1	0	0	0	0	211	0	0	0	0
RS_GCF_027886425.1	TRUE	p__Pseudomonadota	c__Alphaproteobacteria	o__Caulobacterales	f__Caulobacteraceae	g__Brevundimonas	s__Brevundimonas vesicularis_C	d__Bacteria	3042291	66.2211	1	0	0	0	0	214	0	0	0	0
RS_GCF_011045815.1	TRUE	p__Pseudomonadota	c__Gammaproteobacteria	o__Enterobacterales	f__Enterobacteriaceae	g__Proteus	s__Proteus vulgaris_B	d__Bacteria	4611985	38.7313	1	1	1	0	0	95	111	56	0	0
RS_GCF_008370345.1	TRUE	p__Pseudomonadota	c__Gammaproteobacteria	o__Pseudomonadales	f__Oleiphilaceae	g__Marinobacter	s__Marinobacter salinexigens	d__Bacteria	4240922	55.6144	1	0	2	0	0	102	0	71	0	0
GB_GCA_014695175.1	FALSE	p__Cyanobacteriota	c__Cyanobacteriia	o__Cyanobacteriales	f__Microcoleaceae	g__Microcoleus	s__Microcoleus sp014695175	d__Bacteria	6726060	46.01	0	0	0	0	0	0	0	0	0	0
GB_GCA_013695915.1	TRUE	p__Actinomycetota	c__Rubrobacteria	o__Rubrobacterales	f__Rubrobacteraceae	g__Rubrobacter_A	s__Rubrobacter_A sp013695915	d__Bacteria	2765079	67.3931	1	0	0	0	0	207	0	0	0	0
RS_GCF_026339835.1	TRUE	p__Actinomycetota	c__Actinomycetes	o__Streptomycetales	f__Streptomycetaceae	g__Streptomyces	s__Streptomyces sp026339835	d__Bacteria	8636431	70.6673	1	0	0	0	0	229	0	0	0	0
RS_GCF_900115615.1	TRUE	p__Campylobacterota	c__Campylobacteria	o__Campylobacterales	f__Hydrogenimonadaceae	g__Hydrogenimonas	s__Hydrogenimonas thermophila	d__Bacteria	2444910	33.5177	1	0	0	0	0	179	0	0	0	0
RS_GCF_000227585.1	FALSE	p__Pseudomonadota	c__Gammaproteobacteria	o__Burkholderiales	f__Burkholderiaceae	g__Glomeribacter	s__Glomeribacter gigasporarum_B	d__Bacteria	1726950	54.8463	0	0	0	0	0	0	0	0	0	0
GB_GCA_947460255.1	TRUE	p__Bacteroidota	c__Bacteroidia	o__M30B66	f__M30B66	g__CAMCXT01	s__CAMCXT01 sp947460255	d__Bacteria	4133146	41.5387	1	0	0	0	0	99	0	0	0	0
GB_GCA_903897605.1	FALSE	p__Pseudomonadota	c__Alphaproteobacteria	o__Micropepsales	f__Micropepsaceae	g__Rhizomicrobium	s__Rhizomicrobium sp903897605	d__Bacteria	2788515	61.44	0	0	0	0	0	0	0	0	0	0
GB_GCA_902801295.1	TRUE	p__Bacillota_A	c__Clostridia	o__Oscillospirales	f__Oscillospiraceae	g__Limivicinus	s__Limivicinus sp902801295	d__Bacteria	2001919	59.4553	1	0	0	0	0	182	0	0	0	0
RS_GCF_030418305.1	TRUE	p__Actinomycetota	c__Actinomycetes	o__Actinomycetales	f__Demequinaceae	g__Demequina	s__Demequina sp030418305	d__Bacteria	2897854	71.942	1	0	0	0	0	219	0	0	0	0
RS_GCF_002929535.1	TRUE	p__Actinomycetota	c__Actinomycetes	o__Actinomycetales	f__Microbacteriaceae	g__Cryobacterium	s__Cryobacterium sp002929535	d__Bacteria	4028303	63.2559	1	0	0	0	0	234	0	0	0	0
RS_GCF_003568665.1	TRUE	p__Bacteroidota	c__Bacteroidia	o__Chitinophagales	f__Chitinophagaceae	g__Chitinophaga	s__Chitinophaga alhagiae	d__Bacteria	6129793	53.403	1	0	0	0	0	99	0	0	0	0
RS_GCF_001641825.1	TRUE	p__Pseudomonadota	c__Gammaproteobacteria	o__Halothiobacillales	f__Halothiobacillaceae	g__Guyparkeria	s__Guyparkeria sp001641825	d__Bacteria	2292855	66.1921	1	0	0	0	0	97	0	0	0	0
GB_GCA_020200155.1	TRUE	p__Acidobacteriota	c__Blastocatellia	o__Pyrinomonadales	f__Pyrinomonadaceae	g__JAIVJG01	s__JAIVJG01 sp020200155	d__Bacteria	4251322	61.126	1	0	0	0	0	185	0	0	0	0
RS_GCF_028289625.1	TRUE	p__Bacteroidota	c__Bacteroidia	o__Flavobacteriales	f__Flavobacteriaceae	g__Winogradskyella	s__Winogradskyella sp028289625	d__Bacteria	3649992	35.2909	0	1	0	0	0	0	99	0	0	0
RS_GCF_000770795.1	TRUE	p__Pseudomonadota	c__Gammaproteobacteria	o__Xanthomonadales	f__Xanthomonadaceae	g__Lysobacter_A	s__Lysobacter_A dokdonensis	d__Bacteria	3274406	67.2447	1	0	0	0	0	105	0	0	0	0
GB_GCA_026015625.1	TRUE	p__Bacteroidota	c__Bacteroidia	o__Bacteroidales	f__Bacteroidaceae	g__Prevotella	s__Prevotella copri_H	d__Bacteria	3909735	44.9659	1	0	0	0	0	99	0	0	0	0
GB_GCA_020444265.1	TRUE	p__Electryoneota	c__Electryoneia	o__Electryoneales	f__Electryoneaceae	g__JAHLLH01	s__JAHLLH01 sp020444265	d__Bacteria	4329111	55.303	1	0	0	0	0	95	0	0	0	0
GB_GCA_017991635.1	FALSE	p__Patescibacteria	c__Paceibacteria	o__UBA9973	f__UBA2103	g__C7867-001	s__C7867-001 sp017991635	d__Bacteria	726101	48.2421	0	0	0	0	0	0	0	0	0	0
GB_GCA_016879935.1	TRUE	p__Myxococcota	c__Myxococcia	o__Myxococcales	f__Myxococcaceae	g__JAEUJQ01	s__JAEUJQ01 sp016879935	d__Bacteria	9527372	67.7848	2	0	0	0	0	196	0	0	0	0
GB_GCA_001771545.1	TRUE	p__Margulisbacteria	c__WOR-1	o__O2-12-FULL-45-9	f__O2-12-FULL-45-9	g__XYD2-FULL-41-8	s__XYD2-FULL-41-8 sp001771545	d__Bacteria	1789251	41.5888	1	0	0	0	0	227	0	0	0	0
RS_GCF_000012845.1	TRUE	p__Bacteroidota	c__Bacteroidia	o__Bacteroidales	f__Tannerellaceae	g__Parabacteroides	s__Parabacteroides distasonis	d__Bacteria	4811379	45.0596	1	0	0	0	0	111	0	0	0	0
GB_GCA_002813895.1	TRUE	p__Cyanobacteriota	c__Cyanobacteriia	o__Cyanobacteriales	f__Cyanobacteriaceae	g__Cyanobacterium	s__Cyanobacterium sp002813895	d__Bacteria	3296945	37.6614	1	0	0	0	0	192	0	0	0	0
GB_GCA_022705575.1	FALSE	p__Patescibacteria	c__Paceibacteria	o__RBG-13-40-8-A	f__RBG-13-40-8-A	g__JAKJED01	s__JAKJED01 sp022705575	d__Bacteria	655926	33.0876	0	0	0	0	0	0	0	0	0	0
GB_GCA_903911435.1	TRUE	p__Bacteroidota	c__Bacteroidia	o__2-12-FULL-35-15	f__2-12-FULL-35-15	g__2-12-FULL-35-15	s__2-12-FULL-35-15 sp903911435	d__Bacteria	4191965	37.5066	1	0	0	0	0	113	0	0	0	0
GB_GCA_019137115.1	TRUE	p__Bacillota_A	c__Clostridia	o__Christensenellales	f__Aristaeellaceae	g__JAGVSV01	s__JAGVSV01 sp019137115	d__Bacteria	2265054	62.2448	1	0	0	0	0	179	0	0	0	0
GB_GCA_002862095.1	TRUE	p__Pseudomonadota	c__Alphaproteobacteria	o__Rhizobiales	f__Beijerinckiaceae	g__Methylocystis	s__Methylocystis sp002862095	d__Bacteria	3359940	61.2685	1	0	0	0	0	188	0	0	0	0
RS_GCF_000426505.1	TRUE	p__Pseudomonadota	c__Alphaproteobacteria	o__Thalassobaculales	f__Thalassobaculaceae	g__Nisaea	s__Nisaea denitrificans	d__Bacteria	4626718	60.5355	1	0	0	0	0	192	0	0	0	0
RS_GCF_014204525.1	TRUE	p__Pseudomonadota	c__Gammaproteobacteria	o__Burkholderiales	f__Burkholderiaceae	g__Paucibacter_A	s__Paucibacter_A oligotrophus_A	d__Bacteria	5338401	65.7877	1	0	0	0	0	113	0	0	0	0
GB_GCA_905208455.1	TRUE	p__Bacillota_A	c__Clostridia	o__Christensenellales	f__QAND01	g__UMGS1975	s__UMGS1975 sp900556815	d__Bacteria	1800549	53.5625	1	0	0	0	0	181	0	0	0	0
GB_GCA_937899905.1	TRUE	p__Planctomycetota	c__Phycisphaerae	o__Phycisphaerales	f__UBA1924	g__JAHCJI01	s__JAHCJI01 sp937899905	d__Bacteria	3630139	65.8414	1	0	0	0	0	105	0	0	0	0
RS_GCF_024345835.1	TRUE	p__Cyanobacteriota	c__Cyanobacteriia	o__PCC-6307	f__Cyanobiaceae	g__Vulcanococcus	s__Vulcanococcus sp024345835	d__Bacteria	2936087	64.8531	1	0	0	0	0	195	0	0	0	0
RS_GCF_028621995.1	TRUE	p__Fusobacteriota	c__Fusobacteriia	o__Fusobacteriales	f__Fusobacteriaceae	g__Fusobacterium	s__Fusobacterium nucleatum_J	d__Bacteria	2057857	27.1294	1	0	0	0	0	181	0	0	0	0
RS_GCF_028401405.1	TRUE	p__Actinomycetota	c__Actinomycetes	o__Streptomycetales	f__Streptomycetaceae	g__Streptomyces	s__Streptomyces heilongjiangensis	d__Bacteria	8936924	72.1502	1	0	0	0	0	230	0	0	0	0
GB_GCA_023404705.1	TRUE	p__Pseudomonadota	c__Alphaproteobacteria	o__Rhizobiales	f__Xanthobacteraceae	g__FEB-22	s__FEB-22 sp023404705	d__Bacteria	6041336	67.1544	1	0	0	0	0	196	0	0	0	0
GB_GCA_018700535.1	FALSE	p__Patescibacteria	c__ABY1	o__SG8-24	f__GWF2-40-263	g__UM-FILTER-50-9	s__UM-FILTER-50-9 sp018700535	d__Bacteria	1033565	47.0173	0	0	0	0	0	0	0	0	0	0
GB_GCA_018061645.1	FALSE	p__Patescibacteria	c__Paceibacteria	o__Moranbacterales	f__UBA1568	g__JAGOTT01	s__JAGOTT01 sp018061645	d__Bacteria	1002673	54.4764	0	0	0	0	0	0	0	0	0	0
GB_GCA_016931155.1	FALSE	p__Patescibacteria	c__Dojkabacteria	o__B142	f__JAFGFJ01	g__JAFGFJ01	s__JAFGFJ01 sp016931155	d__Bacteria	971167	37.1742	0	0	0	0	0	0	0	0	0	0
GB_GCA_904501705.1	FALSE	p__Bacillota_A	c__Clostridia	o__Oscillospirales	f__Acutalibacteraceae	g__UBA5905	s__UBA5905 sp904501705	d__Bacteria	1722733	55.8239	0	0	0	0	0	0	0	0	0	0
GB_GCA_030774055.1	TRUE	p__Acidobacteriota	c__Terriglobia	o__Terriglobales	f__JACPNR01	g__JACPNR01	s__JACPNR01 sp030774055	d__Bacteria	2887254	63.2275	1	0	0	0	0	199	0	0	0	0
GB_GCA_934691935.1	TRUE	p__Cyanobacteriota	c__Vampirovibrionia	o__Gastranaerophilales	f__Gastranaerophilaceae	g__Stercorousia	s__Stercorousia sp934691935	d__Bacteria	1714269	34.0969	1	0	0	0	0	117	0	0	0	0
RS_GCF_026167665.1	TRUE	p__Actinomycetota	c__Actinomycetes	o__Streptomycetales	f__Streptomycetaceae	g__Streptomyces	s__Streptomyces drozdowiczii	d__Bacteria	7386614	71.9634	1	0	0	0	0	229	0	0	0	0
GB_GCA_003279935.1	TRUE	p__Cyanobacteriota	c__Cyanobacteriia	o__PCC-6307	f__Cyanobiaceae	g__Prochlorococcus_A	s__Prochlorococcus_A sp003279935	d__Bacteria	1489502	30.8359	1	0	0	0	0	194	0	0	0	0
GB_GCA_023417885.1	FALSE	p__Planctomycetota	c__Phycisphaerae	o__Tepidisphaerales	f__JAEZED01	g__JAEZED01	s__JAEZED01 sp023417885	d__Bacteria	4100960	68.4968	0	0	0	0	0	0	0	0	0	0
RS_GCF_014850975.1	TRUE	p__Pseudomonadota	c__Gammaproteobacteria	o__Methylococcales	f__Methylomonadaceae	g__Methylomonas	s__Methylomonas fluvii	d__Bacteria	5589402	51.524	1	0	0	0	0	96	0	0	0	0
GB_GCA_900470285.1	TRUE	p__Pseudomonadota	c__Alphaproteobacteria	o__Rhizobiales	f__Rhizobiaceae	g__Pseudochrobactrum	s__Pseudochrobactrum sp900470285	d__Bacteria	3809732	51.0696	1	0	0	0	0	196	0	0	0	0
GB_GCA_947624945.1	TRUE	p__Bacillota_A	c__Clostridia	o__Oscillospirales	f__CAG-272	g__DTU064	s__DTU064 sp947624945	d__Bacteria	2341009	55.293	1	0	0	0	0	176	0	0	0	0
GB_GCA_938020565.1	TRUE	p__Chloroflexota	c__Anaerolineae	o__Anaerolineales	f__Anaerolineaceae	g__Flexilinea	s__Flexilinea sp938020565	d__Bacteria	2791635	55.2205	1	0	0	0	0	186	0	0	0	0
GB_GCA_919901555.1	FALSE	p__Nitrospirota	c__UBA9217	o__UBA9217	f__UBA9217	g__CAKKPG01	s__CAKKPG01 sp919901555	d__Bacteria	3450293	56.8021	0	0	0	0	0	0	0	0	0	0
RS_GCF_000301055.1	TRUE	p__Bacillota	c__Bacilli	o__Lactobacillales	f__Aerococcaceae	g__Falseniella	s__Falseniella ignava	d__Bacteria	1766666	38.8671	1	0	0	0	0	185	0	0	0	0
GB_GCA_002714805.1	TRUE	p__Bacteroidota	c__Bacteroidia	o__Flavobacteriales	f__UBA7312	g__UBA8444	s__UBA8444 sp002714805	d__Bacteria	1669274	31.6502	1	0	0	0	0	99	0	0	0	0
RS_GCF_000285535.1	TRUE	p__Bacillota	c__Bacilli	o__Bacillales	f__Bacillaceae_L	g__Ferdinandcohnia	s__Ferdinandcohnia timonensis	d__Bacteria	4657724	37.2803	1	0	0	0	0	185	0	0	0	0
RS_GCF_000331245.1	TRUE	p__Pseudomonadota	c__Alphaproteobacteria	o__Sphingomonadales	f__Sphingomonadaceae	g__Blastomonas	s__Blastomonas sp000331245	d__Bacteria	3616216	63.6001	1	0	0	0	0	187	0	0	0	0
GB_GCA_002690495.1	TRUE	p__Pseudomonadota	c__Gammaproteobacteria	o__Comchoanobacterales	f__GCA-002691585	g__GCA-002691585	s__GCA-002691585 sp002690495	d__Bacteria	1158543	36.2847	1	0	0	0	0	97	0	0	0	0
RS_GCF_002096595.1	TRUE	p__Bacillota	c__Bacilli	o__Lactobacillales	f__Streptococcaceae	g__Streptococcus	s__Streptococcus oralis_D	d__Bacteria	1951174	41.1238	1	0	0	0	0	182	0	0	0	0
GB_GCA_029782025.1	TRUE	p__Actinomycetota	c__Acidimicrobiia	o__Acidimicrobiales	f__UBA8139	g__JAKOVR01	s__JAKOVR01 sp029782025	d__Bacteria	4626685	72.7042	1	0	0	0	0	252	0	0	0	0
RS_GCF_002259585.1	TRUE	p__Actinomycetota	c__Actinomycetes	o__Actinomycetales	f__Bifidobacteriaceae	g__Bifidobacterium	s__Bifidobacterium coagulans	d__Bacteria	1741326	47.3328	1	0	0	0	0	222	0	0	0	0
GB_GCA_017304135.1	TRUE	p__Acidobacteriota	c__Terriglobia	o__Bryobacterales	f__Bryobacteraceae	g__JAFLBB01	s__JAFLBB01 sp017304135	d__Bacteria	6493284	64.5336	2	0	0	0	0	177	0	0	0	0
GB_GCA_022378355.1	TRUE	p__Pseudomonadota	c__Gammaproteobacteria	o__Enterobacterales	f__Enterobacteriaceae	g__Brenneria	s__Brenneria bubanii	d__Bacteria	4887228	52.7326	1	1	1	0	0	95	112	55	0	0
GB_GCA_029335925.2	TRUE	p__Pseudomonadota	c__Gammaproteobacteria	o__Halothiobacillales	f__Halothiobacillaceae	g__JARJMX02	s__JARJMX02 sp029335925	d__Bacteria	1644354	62.568	1	0	0	0	0	186	0	0	0	0
RS_GCF_001428005.1	TRUE	p__Actinomycetota	c__Actinomycetes	o__Actinomycetales	f__Micrococcaceae	g__Arthrobacter	s__Arthrobacter sp001428005	d__Bacteria	5887135	65.4473	1	0	0	0	0	241	0	0	0	0
GB_GCA_028279555.1	TRUE	p__Pseudomonadota	c__Alphaproteobacteria	o__Sphingomonadales	f__Sphingomonadaceae	g__Sphingorhabdus_B	s__Sphingorhabdus_B sp028279555	d__Bacteria	2752608	57.5466	1	0	0	0	0	189	0	0	0	0
RS_GCF_000014445.1	TRUE	p__Bacillota	c__Bacilli	o__Lactobacillales	f__Lactobacillaceae	g__Leuconostoc	s__Leuconostoc mesenteroides	d__Bacteria	2075763	37.6686	1	0	0	0	0	181	0	0	0	0
GB_GCA_003249015.1	TRUE	p__Cyanobacteriota	c__Cyanobacteriia	o__Pseudanabaenales	f__Pseudanabaenaceae	g__Pseudanabaena	s__Pseudanabaena sp003249015	d__Bacteria	4472112	43.1491	1	0	0	0	0	191	0	0	0	0
RS_GCF_000204135.1	FALSE	p__Chlamydiota	c__Chlamydiia	o__Chlamydiales	f__Chlamydiaceae	g__Chlamydophila	s__Chlamydophila pecorum	d__Bacteria	1106197	41.076	0	0	0	0	0	0	0	0	0	0
RS_GCF_002022505.1	FALSE	p__Pseudomonadota	c__Alphaproteobacteria	o__Rhizobiales	f__Rhizobiaceae	g__Bartonella	s__Bartonella sp002022505	d__Bacteria	1762996	37.5658	0	0	0	0	0	0	0	0	0	0
GB_GCA_903888615.1	TRUE	p__Pseudomonadota	c__Gammaproteobacteria	o__CAISUE01	f__CAISUE01	g__CAISUE01	s__CAISUE01 sp903888615	d__Bacteria	1722116	42.3496	1	0	0	0	0	103	0	0	0	0
GB_GCA_937858655.1	TRUE	p__Actinomycetota	c__Coriobacteriia	o__WRKU01	f__JAENWW01	g__CALLZE01	s__CALLZE01 sp937858655	d__Bacteria	1390268	48.3845	1	0	0	0	0	185	0	0	0	0
RS_GCF_018861755.1	TRUE	p__Bacillota_A	c__Clostridia	o__Clostridiales	f__Clostridiaceae	g__Clostridium_AD	s__Clostridium_AD sp018861755	d__Bacteria	5445345	31.6524	1	0	0	0	0	177	0	0	0	0
GB_GCA_021819085.1	TRUE	p__Pseudomonadota	c__Gammaproteobacteria	o__Acidiferrobacterales	f__UBA6901	g__JAJYCY01	s__JAJYCY01 sp021819085	d__Bacteria	3419971	61.3437	1	0	0	0	0	110	0	0	0	0
GB_GCA_001787125.1	TRUE	p__Patescibacteria	c__Paceibacteria	o__UBA9973	f__UBA9973	g__UBA9973	s__UBA9973 sp001787125	d__Bacteria	644665	44.1436	1	0	0	0	0	132	0	0	0	0
RS_GCF_900100305.1	TRUE	p__Pseudomonadota	c__Gammaproteobacteria	o__Burkholderiales	f__Burkholderiaceae	g__Paracidovorax	s__Paracidovorax citrulli	d__Bacteria	4848266	68.936	1	0	0	0	0	110	0	0	0	0
RS_GCF_000281895.1	TRUE	p__Pseudomonadota	c__Gammaproteobacteria	o__Pseudomonadales	f__Pseudomonadaceae	g__Pseudomonas_E	s__Pseudomonas_E fluorescens_S	d__Bacteria	6368168	60.6285	1	0	1	0	0	102	0	71	0	0
RS_GCF_945906775.1	TRUE	p__Pseudomonadota	c__Gammaproteobacteria	o__Enterobacterales	f__Enterobacteriaceae	g__Citrobacter	s__Citrobacter sp945906775	d__Bacteria	5212529	51.8459	1	1	1	1	0	95	112	55	46	0
GB_GCA_028823855.1	TRUE	p__Pseudomonadota	c__Alphaproteobacteria	o__Rhodobacterales	f__Rhodobacteraceae	g__MPNP01	s__MPNP01 sp028823855	d__Bacteria	5600817	56.3042	1	0	0	0	0	201	0	0	0	0
GB_GCA_947372965.1	FALSE	p__Actinomycetota	c__Actinomycetes	o__Nanopelagicales	f__Nanopelagicaceae	g__AAA044-D11	s__AAA044-D11 sp947372965	d__Bacteria	1270279	45.6967	0	0	0	0	0	0	0	0	0	0
GB_GCA_944322025.1	TRUE	p__Bacteroidota	c__Bacteroidia	o__Bacteroidales	f__Paludibacteraceae	g__Aphodosoma	s__Aphodosoma sp944322025	d__Bacteria	2440064	53.1418	1	0	0	0	0	96	0	0	0	0
GB_GCA_026003335.1	TRUE	p__Bacteroidota	c__Bacteroidia	o__Chitinophagales	f__CAIOSU01	g__BPHB01	s__BPHB01 sp026003335	d__Bacteria	3905038	46.5399	1	0	0	0	0	99	0	0	0	0
GB_GCA_937862565.1	FALSE	p__Patescibacteria	c__JAEDAM01	o__Absconditabacterales	f__CALMFT01	g__CALMFT01	s__CALMFT01 sp937862565	d__Bacteria	1267808	33.6429	0	0	0	0	0	0	0	0	0	0
GB_GCA_947258705.1	TRUE	p__Pseudomonadota	c__Alphaproteobacteria	o__Rhizobiales	f__CAMYJA01	g__CAMYJA01	s__CAMYJA01 sp947258705	d__Bacteria	2772628	55.965	1	0	0	0	0	194	0	0	0	0
RS_GCF_009617595.1	TRUE	p__Pseudomonadota	c__Alphaproteobacteria	o__Rhodobacterales	f__Rhodobacteraceae	g__Epibacterium	s__Epibacterium aquimaris	d__Bacteria	3681437	56.3491	1	0	0	0	0	187	0	0	0	0
RS_GCF_002742445.1	TRUE	p__Actinomycetota	c__Actinomycetes	o__Actinomycetales	f__Bifidobacteriaceae	g__Bifidobacterium	s__Bifidobacterium sp002742445	d__Bacteria	2069141	56.0546	1	0	0	0	0	219	0	0	0	0
RS_GCF_015864825.1	TRUE	p__Pseudomonadota	c__Gammaproteobacteria	o__Pseudomonadales	f__Moraxellaceae	g__Psychrobacter	s__Psychrobacter sp015864825	d__Bacteria	3372376	42.4911	1	0	0	0	0	126	0	0	0	0
RS_GCF_004354085.1	TRUE	p__Pseudomonadota	c__Gammaproteobacteria	o__Pseudomonadales	f__Halieaceae	g__Halioglobus	s__Halioglobus unicus	d__Bacteria	4193411	59.8688	2	0	1	0	0	120	0	67	0	0
GB_GCA_020638955.1	TRUE	p__Planctomycetota	c__Planctomycetia	o__Planctomycetales	f__Planctomycetaceae	g__JACKHO01	s__JACKHO01 sp020638955	d__Bacteria	6559040	55.4228	1	0	0	0	0	115	0	0	0	0
GB_GCA_016716335.1	TRUE	p__Bacteroidota	c__Bacteroidia	o__Chitinophagales	f__Saprospiraceae	g__OLB9	s__OLB9 sp016716335	d__Bacteria	4006039	42.5348	1	0	0	0	0	100	0	0	0	0
GB_GCA_028711505.1	FALSE	p__Patescibacteria	c__Paceibacteria	o__JAHISW01	f__Tagabacteraceae	g__JAQTSC01	s__JAQTSC01 sp028711505	d__Bacteria	605124	41.5346	0	0	0	0	0	0	0	0	0	0
GB_GCA_001602415.1	TRUE	p__Bacteroidota	c__Bacteroidia	o__NS11-12g	f__UKL13-3	g__UKL13-3	s__UKL13-3 sp001602415	d__Bacteria	3236529	37.3337	1	0	0	0	0	101	0	0	0	0
GB_GCA_025757985.1	FALSE	p__Bacillota_A	c__Clostridia	o__Oscillospirales	f__Ruminococcaceae	g__Gemmiger	s__Gemmiger sp900540595	d__Bacteria	3072273	56.9265	0	0	0	0	0	0	0	0	0	0
GB_GCA_018436925.1	TRUE	p__Desulfobacterota	c__Syntrophia	o__Syntrophales	f__Smithellaceae	g__UBA8904	s__UBA8904 sp018436925	d__Bacteria	3523995	54.078	1	0	0	0	0	177	0	0	0	0
GB_GCA_003354135.1	TRUE	p__Pseudomonadota	c__Alphaproteobacteria	o__Rhodospirillales_A	f__GLO-3	g__GLO-3	s__GLO-3 sp003354135	d__Bacteria	3542425	58.7743	1	0	0	0	0	189	0	0	0	0
GB_GCA_017302615.1	TRUE	p__Pseudomonadota	c__Alphaproteobacteria	o__Sphingomonadales	f__Sphingomonadaceae	g__Novosphingobium	s__Novosphingobium sp017302615	d__Bacteria	3018894	65.6909	1	0	0	0	0	188	0	0	0	0
RS_GCF_023586525.1	FALSE	p__Pseudomonadota	c__Gammaproteobacteria	o__Enterobacterales	f__Enterobacteriaceae_A	g__Blochmannia	s__Blochmannia vicinus	d__Bacteria	778501	28.8576	0	0	0	0	0	0	0	0	0	0
GB_GCA_030429495.1	TRUE	p__Pseudomonadota	c__Alphaproteobacteria	o__Rhodobacterales	f__Rhodobacteraceae	g__Albidovulum	s__Albidovulum sp030429495	d__Bacteria	3831597	64.8924	1	0	0	0	0	191	0	0	0	0
RS_GCF_002931555.1	TRUE	p__Actinomycetota	c__Actinomycetes	o__Actinomycetales	f__Microbacteriaceae	g__Pseudoclavibacter	s__Pseudoclavibacter sp002931555	d__Bacteria	3774425	68.2826	1	0	0	0	0	222	0	0	0	0
RS_GCF_014196715.1	TRUE	p__Bacteroidota	c__Bacteroidia	o__Sphingobacteriales	f__Sphingobacteriaceae	g__Pedobacter	s__Pedobacter zeae	d__Bacteria	5444802	40.3278	1	0	0	0	0	115	0	0	0	0
RS_GCF_020166515.1	TRUE	p__Bacteroidota	c__Bacteroidia	o__Flavobacteriales	f__Flavobacteriaceae	g__Robertkochia	s__Robertkochia marina_A	d__Bacteria	3453190	45.7772	1	1	0	0	0	100	101	0	0	0
RS_GCF_918698085.1	TRUE	p__Bacteroidota	c__Bacteroidia	o__Flavobacteriales	f__Weeksellaceae	g__Chryseobacterium	s__Chryseobacterium sp918698085	d__Bacteria	5066124	36.2112	1	0	0	0	0	96	0	0	0	0
RS_GCF_030160755.1	TRUE	p__Pseudomonadota	c__Alphaproteobacteria	o__Caulobacterales	f__Caulobacteraceae	g__Brevundimonas	s__Brevundimonas denitrificans	d__Bacteria	3012183	68.4731	1	0	0	0	0	221	0	0	0	0
RS_GCF_016863575.1	TRUE	p__Actinomycetota	c__Actinomycetes	o__Mycobacteriales	f__Micromonosporaceae	g__Micromonospora	s__Micromonospora sediminimaris	d__Bacteria	6386706	71.0181	1	0	0	0	0	216	0	0	0	0
GB_GCA_002304995.1	FALSE	p__Desulfobacterota	c__Syntrophia	o__Syntrophales	f__Smithellaceae	g__UBA8904	s__UBA8904 sp002304995	d__Bacteria	3423250	57.9358	0	0	0	0	0	0	0	0	0	0
GB_GCA_029565065.1	TRUE	p__Acidobacteriota	c__JAAYUB01	o__JAAYUB01	f__JAAYUB01	g__JAAYUB01	s__JAAYUB01 sp029565065	d__Bacteria	4404122	66.3344	1	0	0	0	0	181	0	0	0	0
RS_GCF_003048555.1	TRUE	p__Campylobacterota	c__Campylobacteria	o__Campylobacterales	f__Campylobacteraceae	g__Campylobacter_A	s__Campylobacter_A concisus_AO	d__Bacteria	1757021	37.7278	1	0	0	0	0	175	0	0	0	0
RS_GCF_011752565.1	TRUE	p__Pseudomonadota	c__Gammaproteobacteria	o__Pseudomonadales	f__Pseudomonadaceae	g__Pseudomonas_E	s__Pseudomonas_E sp011752565	d__Bacteria	6668369	63.5042	1	0	1	0	0	102	0	71	0	0
GB_GCA_002791035.1	FALSE	p__Patescibacteria	c__Paceibacteria	o__Portnoybacterales	f__UBA2143	g__UM-FILTER-43-11-A	s__UM-FILTER-43-11-A sp002791035	d__Bacteria	510072	43.537	0	0	0	0	0	0	0	0	0	0
GB_GCA_013151025.1	FALSE	p__Acidobacteriota	c__Holophagae	o__Thermotomaculales	f__Thermotomaculaceae	g__UM-FILTER-49-7	s__UM-FILTER-49-7 sp013151025	d__Bacteria	2635118	48.932	0	0	0	0	0	0	0	0	0	0
GB_GCA_016875015.1	TRUE	p__Desulfobacterota	c__Desulfobaccia	o__Desulfobaccales	f__0-14-0-80-60-11	g__0-14-0-80-60-11	s__0-14-0-80-60-11 sp016875015	d__Bacteria	3108308	59.2296	1	0	0	0	0	175	0	0	0	0
GB_GCA_020845735.1	FALSE	p__Chloroflexota	c__Dehalococcoidia	o__UBA2979	f__UBA2979	g__RBC038	s__RBC038 sp020845735	d__Bacteria	2737036	70.3299	0	0	0	0	0	0	0	0	0	0
RS_GCF_002157205.1	TRUE	p__Pseudomonadota	c__Gammaproteobacteria	o__Pseudomonadales	f__Halomonadaceae	g__Kushneria	s__Kushneria marisflavi	d__Bacteria	3667185	59.0473	1	0	1	0	0	103	0	69	0	0
RS_GCF_002355475.1	TRUE	p__Pseudomonadota	c__Gammaproteobacteria	o__Pseudomonadales	f__Pseudomonadaceae	g__Pseudomonas_F	s__Pseudomonas_F furukawaii	d__Bacteria	6242949	65.4919	1	0	1	0	0	102	0	71	0	0
GB_GCA_001187505.1	TRUE	p__Actinomycetota	c__Actinomycetes	o__Mycobacteriales	f__Mycobacteriaceae	g__Mycobacterium	s__Mycobacterium goodii_B	d__Bacteria	7105933	67.5719	1	0	0	0	0	219	0	0	0	0
RS_GCF_005885605.1	TRUE	p__Pseudomonadota	c__Gammaproteobacteria	o__Enterobacterales	f__Alteromonadaceae	g__Colwellia	s__Colwellia ponticola	d__Bacteria	3722219	38.6762	2	1	0	0	0	111	120	0	0	0
RS_GCF_900174585.1	TRUE	p__Pseudomonadota	c__Gammaproteobacteria	o__Pseudomonadales	f__Endozoicomonadaceae	g__Sansalvadorimonas	s__Sansalvadorimonas haliclonae	d__Bacteria	5467208	51.4972	1	0	1	0	0	101	0	74	0	0
GB_GCA_001824295.1	TRUE	p__Patescibacteria	c__Paceibacteria	o__UBA9973	f__Zambryskibacteraceae	g__C7867-006	s__C7867-006 sp001824295	d__Bacteria	728731	39.739	1	0	0	0	0	126	0	0	0	0
RS_GCF_001612985.1	TRUE	p__Actinomycetota	c__Actinomycetes	o__Mycobacteriales	f__Mycobacteriaceae	g__Nocardia	s__Nocardia gamkensis	d__Bacteria	7709792	68.358	1	0	0	0	0	244	0	0	0	0
RS_GCF_000422505.1	TRUE	p__Bacillota	c__Bacilli	o__Paenibacillales	f__Paenibacillaceae	g__Paenibacillus_D	s__Paenibacillus_D pinihumi	d__Bacteria	6760575	48.5767	1	0	0	0	0	182	0	0	0	0
RS_GCF_027111255.2	TRUE	p__Bacteroidota	c__Bacteroidia	o__Flavobacteriales	f__Flavobacteriaceae	g__Flavobacterium	s__Flavobacterium flavigenum	d__Bacteria	5427275	34.2203	1	0	0	0	0	121	0	0	0	0
GB_GCA_003671055.1	TRUE	p__Planctomycetota	c__Phycisphaerae	o__Phycisphaerales	f__SM1A02	g__F1-140-MAGs142	s__F1-140-MAGs142 sp003671055	d__Bacteria	2845198	58.2448	1	0	0	0	0	117	0	0	0	0
RS_GCF_018263905.1	TRUE	p__Pseudomonadota	c__Alphaproteobacteria	o__Rhodobacterales	f__Rhodobacteraceae	g__Loktanella	s__Loktanella sp018263905	d__Bacteria	3832518	60.4514	1	0	0	0	0	193	0	0	0	0
GB_GCA_017859785.1	FALSE	p__Actinomycetota	c__Acidimicrobiia	o__Acidimicrobiales	f__Ilumatobacteraceae	g__Casp-actino5	s__Casp-actino5 sp017859785	d__Bacteria	1961369	66.5484	0	0	0	0	0	0	0	0	0	0
GB_GCA_027451665.1	FALSE	p__Patescibacteria	c__Paceibacteria	o__UBA9973	f__UBA2103	g__C7867-001	s__C7867-001 sp027451665	d__Bacteria	720282	58.0439	0	0	0	0	0	0	0	0	0	0
GB_GCA_015665315.1	TRUE	p__Bacteroidota	c__Bacteroidia	o__Flavobacteriales	f__UA16	g__JADFAK01	s__JADFAK01 sp015665315	d__Bacteria	4606115	44.5272	1	0	0	0	0	99	0	0	0	0
GB_GCA_024684535.1	TRUE	p__Bacillota_A	c__Clostridia	o__Lachnospirales	f__Lachnospiraceae	g__Eubacterium_F	s__Eubacterium_F sp024684535	d__Bacteria	1896653	42.9464	1	0	0	0	0	175	0	0	0	0
RS_GCF_000819445.1	TRUE	p__Actinomycetota	c__Actinomycetes	o__Mycobacteriales	f__Mycobacteriaceae	g__Corynebacterium	s__Corynebacterium humireducens	d__Bacteria	2681312	68.5704	1	0	0	0	0	222	0	0	0	0
RS_GCF_014650755.1	TRUE	p__Actinomycetota	c__Actinomycetes	o__Streptomycetales	f__Streptomycetaceae	g__Streptomyces	s__Streptomyces chryseus	d__Bacteria	7154268	71.595	1	0	0	0	0	248	0	0	0	0
GB_GCA_900313015.1	TRUE	p__Pseudomonadota	c__Alphaproteobacteria	o__Rhodobacterales	f__Rhodobacteraceae	g__OMPR01	s__OMPR01 sp900313015	d__Bacteria	4857958	54.8611	1	0	0	0	0	187	0	0	0	0
GB_GCA_947495575.1	TRUE	p__Pseudomonadota	c__Alphaproteobacteria	o__Rhodobacterales	f__Rhodobacteraceae	g__Alterinioella	s__Alterinioella sp947495575	d__Bacteria	3677925	56.5214	1	0	0	0	0	190	0	0	0	0
RS_GCF_900185595.1	TRUE	p__Cyanobacteriota	c__Cyanobacteriia	o__Cyanobacteriales	f__Nostocaceae	g__Calothrix_A	s__Calothrix_A rhizosoleniae	d__Bacteria	5973003	39.4735	1	0	0	0	0	216	0	0	0	0
RS_GCF_000621565.1	TRUE	p__Bacillota_A	c__Clostridia	o__Lachnospirales	f__Lachnospiraceae	g__Butyrivibrio	s__Butyrivibrio sp000621565	d__Bacteria	3718842	40.6173	1	0	0	0	0	176	0	0	0	0
RS_GCF_900187985.1	TRUE	p__Pseudomonadota	c__Gammaproteobacteria	o__Burkholderiales	f__Methylophilaceae	g__Methylobacillus	s__Methylobacillus rhizosphaerae	d__Bacteria	2368811	52.3808	1	0	0	0	0	108	0	0	0	0
RS_GCF_900129505.1	TRUE	p__Pseudomonadota	c__Alphaproteobacteria	o__Rhizobiales	f__Xanthobacteraceae	g__Bradyrhizobium	s__Bradyrhizobium erythrophlei_D	d__Bacteria	9184751	61.9292	1	0	0	0	0	202	0	0	0	0
GB_GCA_943357745.1	TRUE	p__Patescibacteria	c__ABY1	o__SG8-24	f__UBA9934	g__JAGORL01	s__JAGORL01 sp943357745	d__Bacteria	650612	45.6569	1	0	0	0	0	100	0	0	0	0
GB_GCA_902596925.1	FALSE	p__Pseudomonadota	c__Alphaproteobacteria	o__Pelagibacterales	f__Pelagibacteraceae	g__Pelagibacter	s__Pelagibacter sp902596925	d__Bacteria	1123103	29.2964	0	0	0	0	0	0	0	0	0	0
RS_GCF_014764685.1	TRUE	p__Pseudomonadota	c__Alphaproteobacteria	o__Rhizobiales	f__Beijerinckiaceae	g__Bosea	s__Bosea spartocytisi	d__Bacteria	5926429	66.3833	1	0	0	0	0	194	0	0	0	0
RS_GCF_002265625.1	TRUE	p__Bacteroidota	c__Bacteroidia	o__Bacteroidales	f__Bacteroidaceae	g__Prevotella	s__Prevotella sp002265625	d__Bacteria	3721400	48.6916	1	0	0	0	0	99	0	0	0	0
RS_GCF_019793235.1	TRUE	p__Pseudomonadota	c__Alphaproteobacteria	o__Sphingomonadales	f__Sphingomonadaceae	g__Sphingopyxis	s__Sphingopyxis jiangsuensis	d__Bacteria	3073368	64.7101	1	0	0	0	0	190	0	0	0	0
RS_GCF_001984055.1	TRUE	p__Pseudomonadota	c__Gammaproteobacteria	o__Burkholderiales	f__Burkholderiaceae	g__Variovorax	s__Variovorax sp001984055	d__Bacteria	7190799	67.4707	1	0	0	0	0	108	0	0	0	0
GB_GCA_030068605.1	TRUE	p__Bacteroidota	c__Bacteroidia	o__Cytophagales	f__172606-1	g__JALOMD01	s__JALOMD01 sp030068605	d__Bacteria	9771560	38.8346	1	0	0	0	0	120	0	0	0	0
RS_GCF_016892605.1	TRUE	p__Bacillota	c__Bacilli	o__Lactobacillales	f__Carnobacteriaceae	g__Desemzia	s__Desemzia sp016892605	d__Bacteria	3034747	36.436	1	0	0	0	0	185	0	0	0	0
GB_GCA_009885735.1	FALSE	p__Armatimonadota	c__Chthonomonadetes	o__Chthonomonadales	f__CAJBBX01	g__VFKD01	s__VFKD01 sp009885735	d__Bacteria	4990694	60.1338	0	0	0	0	0	0	0	0	0	0
GB_GCA_003151515.1	FALSE	p__Verrucomicrobiota	c__Verrucomicrobiae	o__Opitutales	f__Opitutaceae	g__Palsa-1447	s__Palsa-1447 sp003151515	d__Bacteria	3606652	67.0309	0	0	0	0	0	0	0	0	0	0
GB_GCA_030689595.1	FALSE	p__Patescibacteria	c__Paceibacteria	o__UBA6257	f__WO2-44-18	g__JAUYHP01	s__JAUYHP01 sp030689595	d__Bacteria	831624	42.5106	0	0	0	0	0	0	0	0	0	0
GB_GCA_018813285.1	TRUE	p__Omnitrophota	c__Koll11	o__Tantalellales	f__Tantalellaceae	g__JAHJBY01	s__JAHJBY01 sp018813285	d__Bacteria	1759202	46.0569	1	0	0	0	0	182	0	0	0	0
GB_GCA_001577715.1	TRUE	p__Desulfobacterota	c__Desulfarculia	o__Adiutricales	f__Adiutricaceae	g__Adiutrix	s__Adiutrix intracellularis	d__Bacteria	2076491	43.2639	1	0	0	0	0	186	0	0	0	0
GB_GCA_025355345.1	TRUE	p__Desulfobacterota	c__Syntrophia	o__Syntrophales	f__Smithellaceae	g__FEN-1160	s__FEN-1160 sp025355345	d__Bacteria	2684158	42.8978	1	0	0	0	0	176	0	0	0	0
RS_GCF_001047675.1	TRUE	p__Pseudomonadota	c__Gammaproteobacteria	o__Enterobacterales	f__Enterobacteriaceae	g__Yersinia	s__Yersinia aleksiciae	d__Bacteria	4000307	49.0378	1	1	0	0	0	95	120	0	0	0
RS_GCF_002356335.1	TRUE	p__Actinomycetota	c__Actinomycetes	o__Mycobacteriales	f__Mycobacteriaceae	g__Mycobacterium	s__Mycobacterium stephanolepidis	d__Bacteria	4994485	63.9523	1	0	0	0	0	223	0	0	0	0
RS_GCF_000934605.2	TRUE	p__Pseudomonadota	c__Gammaproteobacteria	o__Burkholderiales	f__Burkholderiaceae	g__Pandoraea	s__Pandoraea vervacti	d__Bacteria	5736282	63.5245	1	0	0	0	0	118	0	0	0	0
RS_GCF_002814095.1	TRUE	p__Pseudomonadota	c__Alphaproteobacteria	o__Rhodobacterales	f__Rhodobacteraceae	g__Sagittula	s__Sagittula sp002814095	d__Bacteria	5576178	66.2801	1	0	0	0	0	187	0	0	0	0
RS_GCF_014154935.1	TRUE	p__Planctomycetota	c__Planctomycetia	o__Pirellulales	f__Pirellulaceae	g__Stieleria	s__Stieleria sp014154935	d__Bacteria	9558029	59.4672	1	0	0	0	0	112	0	0	0	0
GB_GCA_950096985.1	TRUE	p__Cyanobacteriota	c__Vampirovibrionia	o__Gastranaerophilales	f__Gastranaerophilaceae	g__Stercorousia	s__Stercorousia sp950096985	d__Bacteria	1648103	34.3131	1	0	0	0	0	118	0	0	0	0
GB_GCA_001002405.1	FALSE	p__Patescibacteria	c__Microgenomatia	o__GWA2-44-7	f__Amesbacteraceae	g__GWC2-45-19	s__GWC2-45-19 sp001002405	d__Bacteria	692671	46.7842	0	0	0	0	0	0	0	0	0	0
RS_GCF_016908875.1	TRUE	p__Bacillota	c__Bacilli	o__Bacillales_B	f__Domibacillaceae	g__Bacillus_BX	s__Bacillus_BX ectoiniformans	d__Bacteria	3531559	41.1604	1	0	0	0	0	187	0	0	0	0
RS_GCF_003116835.1	TRUE	p__Bacillota	c__Bacilli	o__Lactobacillales	f__Streptococcaceae	g__Lactococcus	s__Lactococcus termiticola	d__Bacteria	1734781	47.5262	1	0	0	0	0	184	0	0	0	0
RS_GCF_024809425.1	TRUE	p__Pseudomonadota	c__Gammaproteobacteria	o__Pseudomonadales	f__Pseudomonadaceae	g__Pseudomonas_E	s__Pseudomonas_E sp024809425	d__Bacteria	6846989	59.0418	1	0	1	0	0	102	0	71	0	0
GB_GCA_000169395.1	TRUE	p__Pseudomonadota	c__Alphaproteobacteria	o__Rhodobacterales	f__Rhodobacteraceae	g__HTCC2150	s__HTCC2150 sp000169395	d__Bacteria	3582902	49.0511	1	0	0	0	0	191	0	0	0	0
RS_GCF_000701425.1	TRUE	p__Deinococcota	c__Deinococci	o__Deinococcales	f__Deinococcaceae	g__Deinococcus	s__Deinococcus frigens	d__Bacteria	4031778	65.4037	1	0	0	0	0	220	0	0	0	0
RS_GCF_903819165.1	TRUE	p__Bacillota_A	c__Clostridia	o__Tissierellales	f__Peptoniphilaceae	g__Aedoeadaptatus	s__Aedoeadaptatus nemausensis	d__Bacteria	1805580	45.7394	1	0	0	0	0	181	0	0	0	0
RS_GCF_000423845.1	TRUE	p__Desulfobacterota	c__Thermodesulfobacteria	o__Thermodesulfobacteriales	f__Thermodesulfobacteriaceae	g__Thermodesulfobacterium	s__Thermodesulfobacterium hveragerdense	d__Bacteria	1729593	37.0999	1	0	0	0	0	169	0	0	0	0
RS_GCF_014202475.1	TRUE	p__Actinomycetota	c__Actinomycetes	o__Streptomycetales	f__Streptomycetaceae	g__Streptomyces	s__Streptomyces paradoxus	d__Bacteria	8584772	71.3803	1	0	0	0	0	231	0	0	0	0
RS_GCF_022627575.1	TRUE	p__Bacteroidota	c__Bacteroidia	o__Sphingobacteriales	f__Sphingobacteriaceae	g__Sphingobacterium	s__Sphingobacterium rhinopitheci	d__Bacteria	3687888	34.8904	1	0	0	0	0	113	0	0	0	0
RS_GCF_030268225.1	TRUE	p__Actinomycetota	c__Actinomycetes	o__Streptosporangiales	f__Streptosporangiaceae	g__Nocardiopsis_D	s__Nocardiopsis_D ansamitocini	d__Bacteria	5530888	69.0057	1	0	0	0	0	224	0	0	0	0
GB_GCA_002398365.1	TRUE	p__Bacteroidota	c__Bacteroidia	o__Cytophagales	f__Cyclobacteriaceae	g__ELB16-189	s__ELB16-189 sp002398365	d__Bacteria	4972082	42.4096	1	0	0	0	0	96	0	0	0	0
RS_GCF_002843355.2	TRUE	p__Pseudomonadota	c__Gammaproteobacteria	o__Enterobacterales	f__Alteromonadaceae	g__Colwellia	s__Colwellia echini	d__Bacteria	4267715	36.7853	2	1	1	0	0	112	118	57	0	0
RS_GCF_030662075.1	TRUE	p__Actinomycetota	c__Actinomycetes	o__Mycobacteriales	f__Mycobacteriaceae	g__Tsukamurella	s__Tsukamurella strandjordii	d__Bacteria	4459287	69.8013	1	0	0	0	0	238	0	0	0	0
RS_GCF_003399445.1	TRUE	p__Pseudomonadota	c__Alphaproteobacteria	o__Caulobacterales	f__Parvularculaceae	g__Parvularcula	s__Parvularcula marina	d__Bacteria	3400641	59.3395	1	0	0	0	0	193	0	0	0	0
RS_GCF_000801955.1	TRUE	p__Pseudomonadota	c__Gammaproteobacteria	o__Burkholderiales	f__Burkholderiaceae	g__Ralstonia	s__Ralstonia sp000801955	d__Bacteria	6104714	63.466	1	0	0	0	0	117	0	0	0	0
RS_GCF_025506355.1	TRUE	p__Actinomycetota	c__Actinomycetes	o__Streptosporangiales	f__Streptosporangiaceae	g__Sphaerisporangium	s__Sphaerisporangium corydalis	d__Bacteria	9479577	71.2438	1	0	0	0	0	223	0	0	0	0
RS_GCF_002870965.1	TRUE	p__Pseudomonadota	c__Alphaproteobacteria	o__Sphingomonadales	f__Sphingomonadaceae	g__Tsuneonella	s__Tsuneonella flava	d__Bacteria	3275964	60.4566	1	0	0	0	0	189	0	0	0	0
RS_GCF_000186245.1	TRUE	p__Campylobacterota	c__Campylobacteria	o__Campylobacterales	f__Sulfurovaceae	g__Nitratifractor	s__Nitratifractor salsuginis	d__Bacteria	2101285	53.9119	1	0	0	0	0	182	0	0	0	0
GB_GCA_003963125.1	FALSE	p__Pseudomonadota	c__Alphaproteobacteria	o__Rhizobiales	f__Hyphomicrobiaceae	g__AWTP1-13	s__AWTP1-13 sp003963125	d__Bacteria	6219197	65.7269	0	0	0	0	0	0	0	0	0	0
GB_GCA_007859835.1	TRUE	p__Planctomycetota	c__Planctomycetia	o__Pirellulales	f__Pirellulaceae	g__Novipirellula	s__Novipirellula sp007859835	d__Bacteria	9515429	52.7453	1	0	0	0	0	118	0	0	0	0
RS_GCF_018780105.1	TRUE	p__Pseudomonadota	c__Gammaproteobacteria	o__Burkholderiales	f__Thiobacillaceae	g__Thiobacillus	s__Thiobacillus sp018780105	d__Bacteria	3317970	62.0336	1	0	0	0	0	111	0	0	0	0
GB_GCA_013816445.1	FALSE	p__Patescibacteria	c__Saccharimonadia	o__CAILAD01	f__CAILAD01	g__CAILAD01	s__CAILAD01 sp013816445	d__Bacteria	870466	40.17	0	0	0	0	0	0	0	0	0	0
GB_GCA_003327435.1	TRUE	p__Bacteroidota	c__UBA10030	o__UBA10030	f__BY39	g__BY39	s__BY39 sp003327435	d__Bacteria	2626338	33.9349	1	0	0	0	0	110	0	0	0	0
RS_GCF_013449685.1	TRUE	p__Pseudomonadota	c__Gammaproteobacteria	o__Enterobacterales	f__Enterobacteriaceae	g__Pectobacterium	s__Pectobacterium brasiliense_A	d__Bacteria	4665864	51.1978	1	1	1	0	0	95	112	55	0	0
GB_GCA_905221455.1	TRUE	p__Bacillota	c__Bacilli	o__Lactobacillales	f__Streptococcaceae	g__Streptococcus	s__Streptococcus sp905221455	d__Bacteria	2012901	40.2449	1	0	0	0	0	182	0	0	0	0
GB_GCA_016839165.1	TRUE	p__Pseudomonadota	c__Alphaproteobacteria	o__Rhizobiales	f__Xanthobacteraceae	g__Bradyrhizobium	s__Bradyrhizobium sp003020075	d__Bacteria	7670478	64.4986	1	0	0	0	0	199	0	0	0	0
GB_GCA_903935355.1	TRUE	p__Pseudomonadota	c__Gammaproteobacteria	o__Burkholderiales	f__Burkholderiaceae	g__Polynucleobacter	s__Polynucleobacter sp903935355	d__Bacteria	1796862	44.3687	1	0	0	0	0	107	0	0	0	0
GB_GCA_002167805.1	TRUE	p__Bacteroidota	c__Bacteroidia	o__Flavobacteriales	f__Schleiferiaceae	g__TMED14	s__TMED14 sp002167805	d__Bacteria	1720102	36.0925	1	0	0	0	0	102	0	0	0	0
RS_GCF_021018745.1	TRUE	p__Cyanobacteriota	c__Cyanobacteriia	o__Gloeobacterales	f__Gloeobacteraceae	g__Gloeobacter	s__Gloeobacter morelensis	d__Bacteria	5102396	61.7491	1	0	0	0	0	215	0	0	0	0
RS_GCF_900205605.1	TRUE	p__Actinomycetota	c__Actinomycetes	o__Mycobacteriales	f__Mycobacteriaceae	g__Corynebacterium	s__Corynebacterium belfantii	d__Bacteria	2609417	53.6207	1	0	0	0	0	222	0	0	0	0
RS_GCF_004331345.1	TRUE	p__Actinomycetota	c__Actinomycetes	o__Propionibacteriales	f__Kribbellaceae	g__Kribbella	s__Kribbella soli	d__Bacteria	8785001	68.3767	1	0	0	0	0	208	0	0	0	0
GB_GCA_001818655.1	TRUE	p__Patescibacteria	c__Paceibacteria	o__UBA6257	f__2-01-FULL-56-20	g__2-01-FULL-56-20	s__2-01-FULL-56-20 sp001818655	d__Bacteria	648384	55.6948	1	0	0	0	0	114	0	0	0	0
RS_GCF_011745145.1	TRUE	p__Actinomycetota	c__Actinomycetes	o__Mycobacteriales	f__Mycobacteriaceae	g__Mycobacterium	s__Mycobacterium sp011745145	d__Bacteria	6381854	66.094	1	0	0	0	0	227	0	0	0	0
RS_GCF_014205255.1	TRUE	p__Actinomycetota	c__Actinomycetes	o__Streptomycetales	f__Streptomycetaceae	g__Streptomyces	s__Streptomyces caelestis	d__Bacteria	8936092	70.9813	1	0	0	0	0	232	0	0	0	0
RS_GCF_017876535.1	TRUE	p__Actinomycetota	c__Actinomycetes	o__Actinomycetales	f__Micrococcaceae	g__Paeniglutamicibacter	s__Paeniglutamicibacter kerguelensis	d__Bacteria	4807802	64.2182	1	0	0	0	0	232	0	0	0	0
GB_GCA_902826685.1	TRUE	p__Acidobacteriota	c__Terriglobia	o__Bryobacterales	f__Bryobacteraceae	g__CADEFT01	s__CADEFT01 sp902826685	d__Bacteria	7420867	63.1005	1	0	0	0	0	185	0	0	0	0
RS_GCF_015356755.1	TRUE	p__Bacteroidota	c__Bacteroidia	o__Flavobacteriales	f__Flavobacteriaceae	g__Nonlabens	s__Nonlabens antarcticus	d__Bacteria	3270668	38.456	0	1	0	0	0	0	100	0	0	0
GB_GCA_947470805.1	TRUE	p__Acidobacteriota	c__Terriglobia	o__Bryobacterales	f__Bryobacteraceae	g__Ga0077553	s__Ga0077553 sp947470805	d__Bacteria	8706545	62.1485	1	0	0	0	0	177	0	0	0	0
GB_GCA_020630295.1	TRUE	p__Pseudomonadota	c__Alphaproteobacteria	o__Sphingomonadales	f__Sphingomonadaceae	g__Pontixanthobacter	s__Pontixanthobacter sp020630295	d__Bacteria	2435910	56.6508	1	0	0	0	0	188	0	0	0	0
RS_GCF_021532615.1	TRUE	p__Pseudomonadota	c__Alphaproteobacteria	o__Rhodobacterales	f__Rhodobacteraceae	g__Octadecabacter	s__Octadecabacter dasysiphoniae	d__Bacteria	3758812	56.8914	1	0	0	0	0	191	0	0	0	0
GB_GCA_002705305.1	FALSE	p__Actinomycetota	c__Acidimicrobiia	o__Acidimicrobiales	f__Poriferisodaliceae	g__UBA2110	s__UBA2110 sp002705305	d__Bacteria	2540084	55.014	0	0	0	0	0	0	0	0	0	0
RS_GCF_001975985.1	TRUE	p__Bacteroidota	c__Bacteroidia	o__Flavobacteriales	f__Flavobacteriaceae	g__Flavobacterium	s__Flavobacterium sp001975985	d__Bacteria	5681809	33.2552	1	0	0	0	0	122	0	0	0	0
RS_GCF_001660705.2	TRUE	p__Bacteroidota	c__Bacteroidia	o__Bacteroidales	f__Marinilabiliaceae	g__Saccharicrinis	s__Saccharicrinis aurantiacus	d__Bacteria	5879763	35.0638	1	0	0	0	0	99	0	0	0	0
RS_GCF_024346315.1	TRUE	p__Cyanobacteriota	c__Cyanobacteriia	o__PCC-6307	f__Cyanobiaceae	g__ATX-6F1	s__ATX-6F1 sp024346315	d__Bacteria	2964692	66.3321	1	0	0	0	0	188	0	0	0	0
RS_GCF_002807055.1	TRUE	p__Bacteroidota	c__Bacteroidia	o__Flavobacteriales	f__Flavobacteriaceae	g__Confluentibacter	s__Confluentibacter citreus	d__Bacteria	3519809	34.3101	1	1	0	0	0	118	99	0	0	0
RS_GCF_019218745.1	TRUE	p__Pseudomonadota	c__Gammaproteobacteria	o__Enterobacterales	f__Enterobacteriaceae	g__Enterobacter_D	s__Enterobacter_D sp019218745	d__Bacteria	4578474	55.2342	1	1	0	1	0	95	113	0	45	0
RS_GCF_003428625.2	TRUE	p__Acidobacteriota	c__Terriglobia	o__Terriglobales	f__Acidobacteriaceae	g__Paracidobacterium	s__Paracidobacterium acidisoli	d__Bacteria	5001827	60.4733	1	0	0	0	0	229	0	0	0	0
GB_GCA_030431785.1	TRUE	p__Actinomycetota	c__Acidimicrobiia	o__UBA5794	f__UBA5794	g__UBA5794	s__UBA5794 sp030431785	d__Bacteria	2375492	63.157	1	0	0	0	0	172	0	0	0	0
RS_GCF_015708085.1	TRUE	p__Actinomycetota	c__Actinomycetes	o__Actinomycetales	f__Micrococcaceae	g__Arthrobacter_M	s__Arthrobacter_M terrae	d__Bacteria	4434392	62.6337	1	0	0	0	0	240	0	0	0	0
GB_GCA_021785065.1	FALSE	p__Patescibacteria	c__Paceibacteria	o__UBA9973	f__JAKAEA01	g__JAKAEA01	s__JAKAEA01 sp021785065	d__Bacteria	566275	45.8973	0	0	0	0	0	0	0	0	0	0
GB_GCA_011050075.1	TRUE	p__Patescibacteria	c__Paceibacteria	o__UBA6257	f__GWB1-50-10	g__DRGK01	s__DRGK01 sp011050075	d__Bacteria	525945	43.6778	1	0	0	0	0	118	0	0	0	0
RS_GCF_009764645.1	TRUE	p__Pseudomonadota	c__Gammaproteobacteria	o__Pseudomonadales	f__Pseudomonadaceae	g__Pseudomonas_E	s__Pseudomonas_E sp009764645	d__Bacteria	6053559	59.4112	1	0	1	0	0	102	0	71	0	0
GB_GCA_015486285.1	FALSE	p__Desulfobacterota	c__DSWW01	o__DSWW01	f__DSWW01	g__S015-6	s__S015-6 sp015486285	d__Bacteria	4718101	60.8347	0	0	0	0	0	0	0	0	0	0
GB_GCA_014381825.1	TRUE	p__Planctomycetota	c__Planctomycetia	o__Pirellulales	f__Pirellulaceae	g__GCA-2726245	s__GCA-2726245 sp014381825	d__Bacteria	9693342	55.576	1	0	0	0	0	121	0	0	0	0
RS_GCF_018279705.1	TRUE	p__Pseudomonadota	c__Alphaproteobacteria	o__Rhizobiales	f__Xanthobacteraceae	g__Tardiphaga	s__Tardiphaga sp018279705	d__Bacteria	5857905	61.9195	1	0	0	0	0	201	0	0	0	0
RS_GCF_007971025.1	TRUE	p__Bacteroidota	c__Bacteroidia	o__Sphingobacteriales	f__Sphingobacteriaceae	g__Mucilaginibacter	s__Mucilaginibacter ginsenosidivorans	d__Bacteria	5352833	45.5482	1	0	0	0	0	115	0	0	0	0
RS_GCF_001730285.1	TRUE	p__Bacillota	c__Bacilli	o__Lactobacillales	f__Enterococcaceae	g__Enterococcus	s__Enterococcus ureasiticus	d__Bacteria	3585398	35.8056	1	0	0	0	0	183	0	0	0	0
RS_GCF_026672275.1	TRUE	p__Bacteroidota	c__Bacteroidia	o__Bacteroidales	f__Marinifilaceae	g__Marinifilum	s__Marinifilum sp026672275	d__Bacteria	5084015	35.9579	2	0	0	0	0	106	0	0	0	0
GB_GCA_024276095.1	TRUE	p__Pseudomonadota	c__Gammaproteobacteria	o__GCA-2729495	f__GCA-2729495	g__JAJRUG01	s__JAJRUG01 sp024276095	d__Bacteria	2867360	58.5194	1	0	0	0	0	105	0	0	0	0
RS_GCF_001421515.1	TRUE	p__Bacteroidota	c__Bacteroidia	o__Sphingobacteriales	f__Sphingobacteriaceae	g__Pedobacter	s__Pedobacter sp001421515	d__Bacteria	5680060	38.1721	1	0	0	0	0	115	0	0	0	0
GB_GCA_008636105.1	TRUE	p__Planctomycetota	c__Brocadiia	o__Brocadiales	f__Scalinduaceae	g__Scalindua_A	s__Scalindua_A sediminis	d__Bacteria	2955644	38.2504	1	0	0	0	0	112	0	0	0	0
RS_GCF_000425585.1	TRUE	p__Bacteroidota	c__Bacteroidia	o__Chitinophagales	f__Chitinophagaceae	g__Terrimonas	s__Terrimonas ferruginea	d__Bacteria	4686152	48.0833	2	0	0	0	0	125	0	0	0	0
RS_GCF_014196125.1	TRUE	p__Pseudomonadota	c__Alphaproteobacteria	o__Caulobacterales	f__Caulobacteraceae	g__Brevundimonas	s__Brevundimonas mediterranea	d__Bacteria	3409076	67.0351	1	0	0	0	0	212	0	0	0	0
RS_GCF_003350405.1	TRUE	p__Pseudomonadota	c__Alphaproteobacteria	o__Acetobacterales	f__Acetobacteraceae	g__Gluconacetobacter	s__Gluconacetobacter liquefaciens	d__Bacteria	4176944	64.3837	1	0	0	0	0	195	0	0	0	0
RS_GCF_001578885.1	TRUE	p__Bacillota	c__Bacilli	o__Lactobacillales	f__Streptococcaceae	g__Streptococcus	s__Streptococcus sp001578885	d__Bacteria	1676814	45.2387	1	0	0	0	0	183	0	0	0	0
GB_GCA_000353875.1	TRUE	p__Atribacterota	c__Atribacteria	o__Atribacterales	f__Caldatribacteriaceae	g__Caldatribacterium	s__Caldatribacterium californiense	d__Bacteria	2080526	55.4843	1	0	0	0	0	151	0	0	0	0
RS_GCF_009299475.1	TRUE	p__Actinomycetota	c__Actinomycetes	o__Actinomycetales	f__Bifidobacteriaceae	g__Bifidobacterium	s__Bifidobacterium avesanii	d__Bacteria	2684414	66.2858	1	0	0	0	0	222	0	0	0	0
RS_GCF_002809955.1	TRUE	p__Bacillota	c__Bacilli	o__Bacillales	f__Anoxybacillaceae	g__Geobacillus	s__Geobacillus sp002809955	d__Bacteria	3191347	52.544	1	0	0	0	0	182	0	0	0	0
GB_GCA_002929375.1	TRUE	p__Actinomycetota	c__Actinomycetes	o__Actinomycetales	f__Micrococcaceae	g__Arthrobacter_D	s__Arthrobacter_D sp002929375	d__Bacteria	3842190	69.304	1	0	0	0	0	244	0	0	0	0
RS_GCF_020622065.1	TRUE	p__Acidobacteriota	c__Holophagae	o__Holophagales	f__Holophagaceae	g__Geothrix	s__Geothrix sp020622065	d__Bacteria	3348603	67.0886	1	0	0	0	0	107	0	0	0	0
RS_GCF_000471645.3	TRUE	p__Pseudomonadota	c__Gammaproteobacteria	o__Enterobacterales	f__Enterobacteriaceae	g__Schmidhempelia	s__Schmidhempelia bombi	d__Bacteria	2228400	36.39	0	1	0	0	0	0	106	0	0	0
GB_GCA_002839505.1	FALSE	p__Patescibacteria	c__Gracilibacteria	o__UBA1369	f__LOWO2-01-FULL-3	g__PGYE01	s__PGYE01 sp002839505	d__Bacteria	998424	43.3463	0	0	0	0	0	0	0	0	0	0
GB_GCA_016716625.1	TRUE	p__Actinomycetota	c__Actinomycetes	o__Actinomycetales	f__Dermatophilaceae	g__JADJVJ01	s__JADJVJ01 sp016716625	d__Bacteria	2932045	69.6191	1	0	0	0	0	214	0	0	0	0
RS_GCF_019565455.1	TRUE	p__Bacteroidota	c__Bacteroidia	o__Flavobacteriales	f__Flavobacteriaceae	g__Flavobacterium	s__Flavobacterium oreochromis	d__Bacteria	3540003	30.3993	1	0	0	0	0	100	0	0	0	0
RS_GCF_000196275.1	TRUE	p__Deinococcota	c__Deinococci	o__Deinococcales	f__Deinococcaceae	g__Deinococcus	s__Deinococcus geothermalis	d__Bacteria	3247018	66.472	1	0	0	0	0	186	0	0	0	0
RS_GCF_020386615.1	TRUE	p__Bacteroidota	c__Bacteroidia	o__Chitinophagales	f__Chitinophagaceae	g__Chitinophaga	s__Chitinophaga pendula	d__Bacteria	7663439	47.5817	1	0	0	0	0	99	0	0	0	0
RS_GCF_001676655.1	TRUE	p__Pseudomonadota	c__Gammaproteobacteria	o__Pseudomonadales	f__Moraxellaceae	g__Perlucidibaca	s__Perlucidibaca aquatica	d__Bacteria	2492918	55.7471	1	0	0	0	0	95	0	0	0	0
GB_GCA_903895725.1	TRUE	p__Myxococcota	c__UBA9042	o__CAIXZC01	f__CAITUV01	g__CAITUV01	s__CAITUV01 sp903895725	d__Bacteria	7058557	65.5656	1	0	0	0	0	95	0	0	0	0
GB_GCA_021771185.1	TRUE	p__Bacillota_I	c__Bacilli_A	o__RF39	f__UBA660	g__Pelethosoma	s__Pelethosoma sp021771185	d__Bacteria	1244121	29.9409	1	0	0	0	0	177	0	0	0	0
RS_GCF_016757215.1	TRUE	p__Bacteroidota	c__Bacteroidia	o__Cytophagales	f__Cyclobacteriaceae	g__Fulvivirga	s__Fulvivirga sediminis	d__Bacteria	5686206	37.6769	2	0	0	0	0	100	0	0	0	0
RS_GCF_007991755.1	TRUE	p__Actinomycetota	c__Actinomycetes	o__Actinomycetales	f__Cellulomonadaceae	g__Pengzhenrongella	s__Pengzhenrongella aerilata	d__Bacteria	4064307	74.4052	1	0	0	0	0	217	0	0	0	0
RS_GCF_900104045.1	TRUE	p__Desulfobacterota	c__Desulfovibrionia	o__Desulfovibrionales	f__Desulfonauticaceae	g__Desulfonauticus	s__Desulfonauticus submarinus	d__Bacteria	2100696	32.4722	1	0	0	0	0	179	0	0	0	0
RS_GCF_924513355.1	TRUE	p__Bacillota	c__Bacilli	o__Paenibacillales	f__Paenibacillaceae	g__Paenibacillus	s__Paenibacillus pseudetheri	d__Bacteria	6640894	43.4756	1	0	0	0	0	182	0	0	0	0
RS_GCF_000973105.1	TRUE	p__Bacteroidota	c__Bacteroidia	o__Flavobacteriales	f__Flavobacteriaceae	g__Zobellia	s__Zobellia galactanivorans	d__Bacteria	5521712	42.7796	1	1	0	0	0	100	99	0	0	0
RS_GCF_000341105.1	TRUE	p__Actinomycetota	c__Actinomycetes	o__Streptosporangiales	f__Streptosporangiaceae	g__Nocardiopsis_A	s__Nocardiopsis_A potens	d__Bacteria	6909969	74.8431	1	0	0	0	0	267	0	0	0	0
GB_GCA_026418295.1	TRUE	p__WOR-3	c__WOR-3	o__UBA2258	f__UBA2258	g__JAOABP01	s__JAOABP01 sp026418295	d__Bacteria	1797082	53.7283	1	0	0	0	0	106	0	0	0	0
RS_GCF_000526415.1	TRUE	p__Chloroflexota	c__Chloroflexia	o__Chloroflexales	f__Kallotenuaceae	g__Kallotenue	s__Kallotenue papyrolyticum	d__Bacteria	4475263	65.7738	1	0	0	0	0	187	0	0	0	0
GB_GCA_947493265.1	TRUE	p__Pseudomonadota	c__Alphaproteobacteria	o__Rhodobacterales	f__Rhodobacteraceae	g__Litoreibacter	s__Litoreibacter sp947493265	d__Bacteria	3521727	55.5249	1	0	0	0	0	191	0	0	0	0
RS_GCF_009755225.1	TRUE	p__Bacteroidota	c__Bacteroidia	o__Cytophagales	f__Hymenobacteraceae	g__Hymenobacter	s__Hymenobacter ginkgonis	d__Bacteria	5672745	59.2665	1	0	0	0	0	99	0	0	0	0
RS_GCF_017939705.1	TRUE	p__Bacillota	c__Bacilli	o__Bacillales_H	f__Bacillaceae_D	g__Halalkalibacter	s__Halalkalibacter suaedae	d__Bacteria	4324862	38.0787	2	0	0	0	0	185	0	0	0	0
RS_GCF_030164465.1	TRUE	p__Pseudomonadota	c__Alphaproteobacteria	o__Rhodobacterales	f__Rhodobacteraceae	g__Arenibacterium_A	s__Arenibacterium_A sp030164465	d__Bacteria	4750166	63.7566	1	0	0	0	0	187	0	0	0	0
GB_GCA_016222905.1	TRUE	p__Nitrospirota	c__Thermodesulfovibrionia	o__UBA6902	f__UBA6902	g__JACRPZ01	s__JACRPZ01 sp016222905	d__Bacteria	2836922	43.9542	1	0	0	0	0	171	0	0	0	0
RS_GCF_024436065.1	TRUE	p__Bacillota	c__Bacilli	o__Paenibacillales	f__Paenibacillaceae	g__Saccharibacillus	s__Saccharibacillus sp024436065	d__Bacteria	4268680	46.6124	1	0	0	0	0	186	0	0	0	0
RS_GCF_020514235.1	TRUE	p__Cyanobacteriota	c__Cyanobacteriia	o__PCC-6307	f__Cyanobiaceae	g__Parasynechococcus	s__Parasynechococcus sp013911515	d__Bacteria	2326594	59.8906	1	0	0	0	0	195	0	0	0	0
RS_GCF_014926585.1	TRUE	p__Pseudomonadota	c__Alphaproteobacteria	o__Rhizobiales	f__Devosiaceae	g__Devosia	s__Devosia beringensis	d__Bacteria	4048765	63.8413	1	0	0	0	0	188	0	0	0	0
GB_GCA_947383695.1	FALSE	p__Actinomycetota	c__Actinomycetes	o__Nanopelagicales	f__Nanopelagicaceae	g__Planktophila	s__Planktophila sp947383695	d__Bacteria	1431431	46.4946	0	0	0	0	0	0	0	0	0	0
RS_GCF_020526085.1	TRUE	p__Pseudomonadota	c__Gammaproteobacteria	o__Enterobacterales	f__Enterobacteriaceae	g__Klebsiella	s__Klebsiella africana	d__Bacteria	5443802	56.697	1	1	0	1	0	95	111	0	46	0
GB_GCA_021151485.1	TRUE	p__Pseudomonadota	c__Gammaproteobacteria	o__Burkholderiales	f__Burkholderiaceae	g__JAGKXB01	s__JAGKXB01 sp021151485	d__Bacteria	2178440	45.8089	1	0	0	0	0	119	0	0	0	0
GB_GCA_021108375.1	TRUE	p__Planctomycetota	c__Phycisphaerae	o__Sedimentisphaerales	f__UBA12454	g__JAIORA01	s__JAIORA01 sp021108375	d__Bacteria	2363013	44.9685	1	0	0	0	0	111	0	0	0	0
RS_GCF_003286915.1	TRUE	p__Bacteroidota	c__Bacteroidia	o__Cytophagales	f__Cyclobacteriaceae	g__Ohtaekwangia	s__Ohtaekwangia flava	d__Bacteria	6542746	43.4754	2	0	0	0	0	100	0	0	0	0
GB_GCA_027858435.1	FALSE	p__Patescibacteria	c__ABY1	o__BM507	f__UBA12465	g__UBA12465	s__UBA12465 sp027858435	d__Bacteria	916355	29.9511	0	0	0	0	0	0	0	0	0	0
RS_GCF_014192095.1	TRUE	p__Pseudomonadota	c__Alphaproteobacteria	o__Rhizobiales	f__Rhizobiaceae	g__Phyllobacterium	s__Phyllobacterium trifolii	d__Bacteria	6306857	56.3976	1	0	0	0	0	197	0	0	0	0
RS_GCF_902364355.1	TRUE	p__Actinomycetota	c__Coriobacteriia	o__Coriobacteriales	f__Coriobacteriaceae	g__Collinsella	s__Collinsella aerofaciens_AF	d__Bacteria	2229519	59.8218	1	0	0	0	0	194	0	0	0	0
GB_GCA_938040315.1	TRUE	p__WOR-3	c__WOR-3	o__UBA2258	f__DTDR01	g__DTDR01	s__DTDR01 sp938040315	d__Bacteria	1488781	30.5184	1	0	0	0	0	100	0	0	0	0
RS_GCF_002001085.1	TRUE	p__Pseudomonadota	c__Gammaproteobacteria	o__Xanthomonadales	f__Rhodanobacteraceae	g__Rhodanobacter	s__Rhodanobacter sp002001085	d__Bacteria	3815713	65.4305	1	0	0	0	0	107	0	0	0	0
RS_GCF_002845745.1	FALSE	p__Pseudomonadota	c__Alphaproteobacteria	o__Rhodospirillales	f__Magnetospirillaceae	g__Telmatospirillum	s__Telmatospirillum siberiense	d__Bacteria	6202994	62.3337	0	0	0	0	0	0	0	0	0	0
RS_GCF_003934165.1	TRUE	p__Pseudomonadota	c__Alphaproteobacteria	o__Rhizobiales	f__Rhizobiaceae	g__Pseudaminobacter	s__Pseudaminobacter arsenicus	d__Bacteria	5448824	61.4166	1	0	0	0	0	185	0	0	0	0
GB_GCA_013359255.1	TRUE	p__Bacteroidota	c__Bacteroidia	o__Flavobacteriales	f__Vicingaceae	g__BCD5	s__BCD5 sp013359255	d__Bacteria	2923153	35.7851	1	0	0	0	0	98	0	0	0	0
GB_GCA_014946745.1	TRUE	p__Pseudomonadota	c__Gammaproteobacteria	o__Xanthomonadales	f__Xanthomonadaceae	g__Aquimonas	s__Aquimonas sp014946745	d__Bacteria	4856488	68.1373	2	0	0	0	0	124	0	0	0	0
GB_GCA_016713505.1	TRUE	p__Pseudomonadota	c__Gammaproteobacteria	o__Competibacterales	f__Competibacteraceae	g__Competibacter_A	s__Competibacter_A sp016713505	d__Bacteria	3732416	60.4983	2	0	0	0	0	121	0	0	0	0
RS_GCF_002067135.1	TRUE	p__Bacteroidota	c__Bacteroidia	o__Cytophagales	f__Spirosomataceae	g__Spirosoma	s__Spirosoma rigui	d__Bacteria	5828404	54.4263	1	1	0	0	0	97	120	0	0	0
RS_GCF_003184265.1	TRUE	p__Pseudomonadota	c__Gammaproteobacteria	o__Acidiferrobacterales	f__Acidiferrobacteraceae	g__Acidiferrobacter	s__Acidiferrobacter sp003184265	d__Bacteria	3398398	64.1895	1	0	0	0	0	99	0	0	0	0
RS_GCF_003352185.1	TRUE	p__Pseudomonadota	c__Gammaproteobacteria	o__Pseudomonadales	f__Pseudomonadaceae	g__Pseudomonas_E	s__Pseudomonas_E kribbensis	d__Bacteria	6324282	60.5451	1	0	1	0	0	102	0	71	0	0
RS_GCF_000327065.1	TRUE	p__Pseudomonadota	c__Gammaproteobacteria	o__Pseudomonadales	f__Pseudomonadaceae	g__Stutzerimonas	s__Stutzerimonas stutzeri_AE	d__Bacteria	4600489	62.4926	1	0	1	0	0	102	0	71	0	0
RS_GCF_016127315.1	TRUE	p__Pseudomonadota	c__Gammaproteobacteria	o__Burkholderiales	f__Burkholderiaceae	g__Achromobacter	s__Achromobacter insuavis_A	d__Bacteria	6987272	68.1307	1	0	0	0	0	111	0	0	0	0
RS_GCF_020911925.1	TRUE	p__Bacteroidota	c__Bacteroidia	o__Flavobacteriales	f__Flavobacteriaceae	g__Flavobacterium	s__Flavobacterium sp001027725	d__Bacteria	5740613	35.3004	1	0	0	0	0	100	0	0	0	0
RS_GCF_003710085.1	TRUE	p__Actinomycetota	c__Actinomycetes	o__Propionibacteriales	f__Nocardioidaceae	g__Nocardioides	s__Nocardioides pantholopis	d__Bacteria	4041717	73.2362	1	0	0	0	0	208	0	0	0	0
RS_GCF_009796845.1	TRUE	p__Pseudomonadota	c__Gammaproteobacteria	o__Pseudomonadales	f__Halomonadaceae	g__Cobetia	s__Cobetia sp009796845	d__Bacteria	4118938	57.7043	1	0	1	0	0	102	0	69	0	0
RS_GCF_001270065.2	TRUE	p__Pseudomonadota	c__Gammaproteobacteria	o__Burkholderiales	f__Burkholderiaceae	g__Limnohabitans_A	s__Limnohabitans_A planktonicus	d__Bacteria	4873611	59.3941	1	0	0	0	0	109	0	0	0	0
RS_GCF_017303315.1	TRUE	p__Bacillota	c__Bacilli	o__Bacillales_G	f__HB172195	g__Anaerobacillus_A	s__Anaerobacillus_A sp017303315	d__Bacteria	4157308	39.8424	1	0	0	0	0	187	0	0	0	0
RS_GCF_004115925.1	TRUE	p__Pseudomonadota	c__Gammaproteobacteria	o__Enterobacterales	f__Enterobacteriaceae	g__Lelliottia	s__Lelliottia nimipressuralis	d__Bacteria	4616251	54.8492	1	1	0	1	0	95	113	0	45	0
RS_GCF_011806525.1	TRUE	p__Pseudomonadota	c__Alphaproteobacteria	o__Rhodospirillales_A	f__Thalassospiraceae	g__Thalassospira	s__Thalassospira sp011806525	d__Bacteria	4288042	54.4948	2	0	0	0	0	197	0	0	0	0
RS_GCF_000196795.1	TRUE	p__Pseudomonadota	c__Gammaproteobacteria	o__Pseudomonadales	f__Moraxellaceae	g__Acinetobacter	s__Acinetobacter oleivorans	d__Bacteria	4152543	38.7321	1	0	0	0	0	112	0	0	0	0
GB_GCA_003281385.1	TRUE	p__Cyanobacteriota	c__Cyanobacteriia	o__PCC-6307	f__Cyanobiaceae	g__Prochlorococcus_A	s__Prochlorococcus_A sp003281385	d__Bacteria	1497472	31.222	1	0	0	0	0	194	0	0	0	0
RS_GCF_000971155.1	TRUE	p__Actinomycetota	c__Actinomycetes	o__Actinomycetales	f__Demequinaceae	g__Demequina	s__Demequina maris	d__Bacteria	2966865	72.3504	1	0	0	0	0	215	0	0	0	0
RS_GCF_010723305.1	TRUE	p__Actinomycetota	c__Actinomycetes	o__Mycobacteriales	f__Mycobacteriaceae	g__Mycobacterium	s__Mycobacterium botniense	d__Bacteria	4335050	65.656	1	0	0	0	0	207	0	0	0	0
RS_GCF_014141525.1	TRUE	p__Actinomycetota	c__Actinomycetes	o__Streptomycetales	f__Streptomycetaceae	g__Streptomyces	s__Streptomyces calidiresistens	d__Bacteria	6196881	73.05	1	0	0	0	0	231	0	0	0	0
RS_GCF_000423445.1	TRUE	p__Actinomycetota	c__Actinomycetes	o__Propionibacteriales	f__Propionibacteriaceae	g__Acidipropionibacterium	s__Acidipropionibacterium thoenii	d__Bacteria	2938072	67.9711	1	0	0	0	0	204	0	0	0	0
RS_GCF_933208495.1	FALSE	p__Bacillota	c__Bacilli	o__Lactobacillales	f__Lactobacillaceae	g__Convivina	s__Convivina sp933208495	d__Bacteria	1526059	40.1439	0	0	0	0	0	0	0	0	0	0
GB_GCA_903927265.1	TRUE	p__Actinomycetota	c__Actinomycetes	o__S36-B12	f__CAIYMF01	g__CAIYMF01	s__CAIYMF01 sp903927265	d__Bacteria	3667950	62.0325	1	0	0	0	0	198	0	0	0	0
GB_GCA_903909435.1	TRUE	p__Acidobacteriota	c__Terriglobia	o__Bryobacterales	f__Bryobacteraceae	g__CAIVVT01	s__CAIVVT01 sp903909435	d__Bacteria	7589053	61.5818	1	0	0	0	0	201	0	0	0	0
RS_GCF_024979235.1	TRUE	p__Actinomycetota	c__Actinomycetes	o__Actinomycetales	f__Microbacteriaceae	g__Herbiconiux	s__Herbiconiux aconitum	d__Bacteria	4160394	68.2188	1	0	0	0	0	238	0	0	0	0
GB_GCA_002691385.1	FALSE	p__Bacteroidota	c__Bacteroidia	o__Cytophagales	f__Cyclobacteriaceae	g__UBA4465	s__UBA4465 sp002691385	d__Bacteria	2959024	36.243	0	0	0	0	0	0	0	0	0	0
RS_GCF_024509555.1	TRUE	p__Bacillota	c__Bacilli	o__Lactobacillales	f__Streptococcaceae	g__Streptococcus	s__Streptococcus suis_AD	d__Bacteria	2278006	41.7192	1	0	0	0	0	180	0	0	0	0
RS_GCF_008107645.1	TRUE	p__Bacillota	c__Bacilli	o__Lactobacillales	f__Lactobacillaceae	g__Leuconostoc	s__Leuconostoc litchii	d__Bacteria	1865857	35.8083	1	0	0	0	0	181	0	0	0	0
RS_GCF_003992055.1	TRUE	p__Bacillota_C	c__Negativicutes	o__Veillonellales	f__Veillonellaceae	g__F0422	s__F0422 sp003992055	d__Bacteria	1893839	39.3426	1	0	0	0	0	177	0	0	0	0
GB_GCA_013449725.1	TRUE	p__Actinomycetota	c__Actinomycetes	o__Mycobacteriales	f__Mycobacteriaceae	g__Mycobacterium	s__Mycobacterium sp013449725	d__Bacteria	4912246	63.8446	1	0	0	0	0	222	0	0	0	0
GB_GCA_002773755.1	TRUE	p__Patescibacteria	c__Paceibacteria	o__UBA6257	f__Colwellbacteraceae	g__1-14-0-10-41-28	s__1-14-0-10-41-28 sp002773755	d__Bacteria	388300	40.8226	1	0	0	0	0	104	0	0	0	0
GB_GCA_023511625.1	TRUE	p__Bacillota_E	c__Sulfobacillia	o__Sulfobacillales	f__Sulfobacillaceae	g__JAIMAE01	s__JAIMAE01 sp023511625	d__Bacteria	2585636	66.7073	1	0	0	0	0	172	0	0	0	0
GB_GCA_016700095.1	FALSE	p__Patescibacteria	c__Microgenomatia	o__GWA2-44-7	f__UBA8517	g__GCA-016700095	s__GCA-016700095 sp016700095	d__Bacteria	1274238	37.6883	0	0	0	0	0	0	0	0	0	0
GB_GCA_012959525.1	FALSE	p__Planctomycetota	c__UBA1135	o__UBA1135	f__GCA-002686595	g__GCA-2720975	s__GCA-2720975 sp012959525	d__Bacteria	4036135	63.9319	0	0	0	0	0	0	0	0	0	0
GB_GCA_021414115.1	TRUE	p__Planctomycetota	c__Planctomycetia	o__Pirellulales	f__UBA1268	g__QWPN01	s__QWPN01 sp021414115	d__Bacteria	4346575	67.0887	2	0	0	0	0	125	0	0	0	0
GB_GCA_003223135.1	TRUE	p__Acidobacteriota	c__Polarisedimenticolia	o__Gp22-AA2	f__Gp22-AA2	g__Gp22-AA3	s__Gp22-AA3 sp003223135	d__Bacteria	3715941	67.5659	1	0	0	0	0	181	0	0	0	0
RS_GCF_000332315.1	TRUE	p__Cyanobacteriota	c__Cyanobacteriia	o__PCC-9006	f__Prochlorotrichaceae	g__Prochlorothrix	s__Prochlorothrix hollandica	d__Bacteria	5646343	54.4046	1	0	0	0	0	209	0	0	0	0
RS_GCF_014489515.1	FALSE	p__Pseudomonadota	c__Alphaproteobacteria	o__Sphingomonadales	f__Sphingomonadaceae	g__Sphingomicrobium	s__Sphingomicrobium sediminicola	d__Bacteria	2757025	62.8698	0	0	0	0	0	0	0	0	0	0
RS_GCF_009738185.1	TRUE	p__Pseudomonadota	c__Gammaproteobacteria	o__Enterobacterales	f__Enterobacteriaceae	g__Erwinia	s__Erwinia sp009738185	d__Bacteria	4750253	53.1647	1	1	0	0	0	95	116	0	0	0
GB_GCA_030427295.1	FALSE	p__Patescibacteria	c__Gracilibacteria	o__UM-FILTER-43-11	f__UM-FILTER-43-11	g__JAUHWS01	s__JAUHWS01 sp030427295	d__Bacteria	1481779	43.3632	0	0	0	0	0	0	0	0	0	0
RS_GCF_004028275.1	TRUE	p__Pseudomonadota	c__Gammaproteobacteria	o__Thiomicrospirales	f__Thiomicrospiraceae	g__Hydrogenovibrio	s__Hydrogenovibrio thermophilus	d__Bacteria	2612894	50.4786	1	0	0	0	0	111	0	0	0	0
RS_GCF_000737245.1	TRUE	p__Pseudomonadota	c__Gammaproteobacteria	o__Pseudomonadales	f__Pseudomonadaceae	g__Pseudomonas_E	s__Pseudomonas_E syringae_J	d__Bacteria	5816171	57.8436	1	0	1	0	0	102	0	71	0	0
GB_GCA_009797885.1	TRUE	p__Bacteroidota	c__Bacteroidia	o__Flavobacteriales	f__Flavobacteriaceae	g__JANQSA01	s__JANQSA01 sp009797885	d__Bacteria	5283345	43.1825	1	1	0	0	0	100	100	0	0	0
GB_GCA_000531095.1	TRUE	p__Planctomycetota	c__Planctomycetia	o__Gemmatales	f__Gemmataceae	g__Gemmata	s__Gemmata massiliana	d__Bacteria	9269192	64.0408	1	0	0	0	0	114	0	0	0	0
RS_GCF_002933955.1	TRUE	p__Bacteroidota	c__Bacteroidia	o__Bacteroidales	f__Bacteroidaceae	g__Alloprevotella	s__Alloprevotella sp002933955	d__Bacteria	2881414	46.9059	1	0	0	0	0	99	0	0	0	0
RS_GCF_000175195.1	TRUE	p__Pseudomonadota	c__Gammaproteobacteria	o__Enterobacterales	f__Pasteurellaceae	g__Actinobacillus_A	s__Actinobacillus_A minor	d__Bacteria	2425264	39.2681	0	1	0	0	0	0	94	0	0	0
RS_GCF_014635305.1	TRUE	p__Actinomycetota	c__Actinomycetes	o__Mycobacteriales	f__Mycobacteriaceae	g__Williamsia_A	s__Williamsia_A phyllosphaerae	d__Bacteria	4809572	68.0825	1	0	0	0	0	243	0	0	0	0
GB_GCA_937125395.1	TRUE	p__Pseudomonadota	c__Gammaproteobacteria	o__Enterobacterales	f__Alteromonadaceae	g__Opacimonas	s__Opacimonas sp937125395	d__Bacteria	3262577	41.9321	1	1	1	0	0	95	118	58	0	0
GB_GCA_945889645.1	FALSE	p__Pseudomonadota	c__Alphaproteobacteria	o__CAIVPW01	f__CAIVPW01	g__CAIVPW01	s__CAIVPW01 sp945889645	d__Bacteria	2333417	66.9303	0	0	0	0	0	0	0	0	0	0
RS_GCF_000372865.1	TRUE	p__Pseudomonadota	c__Gammaproteobacteria	o__Methylococcales	f__Methylomonadaceae	g__Methylosarcina	s__Methylosarcina fibrata	d__Bacteria	4978464	54.0673	1	0	0	0	0	96	0	0	0	0
RS_GCF_023516495.1	TRUE	p__Pseudomonadota	c__Alphaproteobacteria	o__Sphingomonadales	f__Sphingomonadaceae	g__Sphingomicrobium	s__Sphingomicrobium anseongensis	d__Bacteria	2226119	64.5799	1	0	0	0	0	189	0	0	0	0
RS_GCF_000970795.1	TRUE	p__Bacillota	c__Bacilli	o__Lactobacillales	f__Lactobacillaceae	g__Bombilactobacillus	s__Bombilactobacillus mellifer	d__Bacteria	1815047	39.3043	1	0	0	0	0	182	0	0	0	0
RS_GCF_002556635.1	TRUE	p__Pseudomonadota	c__Alphaproteobacteria	o__Sphingomonadales	f__Sphingomonadaceae	g__Novosphingobium	s__Novosphingobium sp002556635	d__Bacteria	5024522	65.8303	1	0	0	0	0	190	0	0	0	0
RS_GCF_004770615.1	TRUE	p__Spirochaetota	c__Leptospirae	o__Leptospirales	f__Leptospiraceae	g__Leptospira_B	s__Leptospira_B langatensis	d__Bacteria	4089386	44.7933	1	0	0	0	0	95	0	0	0	0
RS_GCF_024621935.1	TRUE	p__Pseudomonadota	c__Gammaproteobacteria	o__Xanthomonadales	f__Xanthomonadaceae	g__Stenotrophomonas	s__Stenotrophomonas muris	d__Bacteria	4732967	66.6827	1	0	0	0	0	105	0	0	0	0
GB_GCA_031316155.1	TRUE	p__Planctomycetota	c__Brocadiia	o__Brocadiales	f__Scalinduaceae	g__SCAELEC01	s__SCAELEC01 sp031316155	d__Bacteria	4063349	39.5761	1	0	0	0	0	103	0	0	0	0
GB_GCA_004366205.1	FALSE	p__Actinomycetota	c__Acidimicrobiia	o__Acidimicrobiales	f__SIRW01	g__SIRW01	s__SIRW01 sp004366205	d__Bacteria	3443036	73.9195	0	0	0	0	0	0	0	0	0	0
RS_GCF_002138415.1	TRUE	p__Pseudomonadota	c__Gammaproteobacteria	o__Xanthomonadales	f__Xanthomonadaceae	g__Stenotrophomonas	s__Stenotrophomonas maltophilia_G	d__Bacteria	4668743	66.2507	1	0	0	0	0	105	0	0	0	0
RS_GCF_018687895.1	TRUE	p__Pseudomonadota	c__Gammaproteobacteria	o__Burkholderiales	f__Burkholderiaceae	g__Polynucleobacter	s__Polynucleobacter sp018687895	d__Bacteria	2067562	45.9376	1	0	0	0	0	107	0	0	0	0
GB_GCA_020724225.1	FALSE	p__Patescibacteria	c__JAEDAM01	o__BD1-5	f__UBA6164	g__Altimarinus	s__Altimarinus sp020724225	d__Bacteria	1168323	24.6769	0	0	0	0	0	0	0	0	0	0
RS_GCF_004020545.1	TRUE	p__Pseudomonadota	c__Alphaproteobacteria	o__Rhizobiales	f__Rhizobiaceae	g__Mesorhizobium	s__Mesorhizobium sp004020545	d__Bacteria	6993374	63.2951	1	0	0	0	0	194	0	0	0	0
GB_GCA_000063525.1	TRUE	p__Cyanobacteriota	c__Cyanobacteriia	o__PCC-6307	f__Cyanobiaceae	g__RCC307	s__RCC307 sp000063525	d__Bacteria	2224914	60.8435	1	0	0	0	0	187	0	0	0	0
GB_GCA_937864125.1	FALSE	p__Patescibacteria	c__Paceibacteria	o__Moranbacterales	f__UBA1568	g__JAGOTT01	s__JAGOTT01 sp937864125	d__Bacteria	840372	52.3315	0	0	0	0	0	0	0	0	0	0
RS_GCF_000815225.1	TRUE	p__Pseudomonadota	c__Gammaproteobacteria	o__Francisellales	f__Francisellaceae	g__Allofrancisella	s__Allofrancisella guangzhouensis	d__Bacteria	1661527	31.9905	1	0	0	0	0	98	0	0	0	0
RS_GCF_021789175.1	TRUE	p__Actinomycetota	c__Actinomycetes	o__Actinomycetales	f__Micrococcaceae	g__Arthrobacter	s__Arthrobacter sp021789175	d__Bacteria	4564406	63.6354	1	0	0	0	0	241	0	0	0	0
RS_GCF_001014645.1	TRUE	p__Pseudomonadota	c__Gammaproteobacteria	o__Xanthomonadales	f__Xanthomonadaceae	g__Luteimonas_D	s__Luteimonas_D sp001014645	d__Bacteria	3945173	71.0479	1	0	0	0	0	108	0	0	0	0
RS_GCF_004217185.1	TRUE	p__Actinomycetota	c__Actinomycetes	o__Mycobacteriales	f__Pseudonocardiaceae	g__Pseudonocardia	s__Pseudonocardia sediminis	d__Bacteria	6612042	72.9187	1	0	0	0	0	207	0	0	0	0
RS_GCF_023746535.1	TRUE	p__Pseudomonadota	c__Alphaproteobacteria	o__Sneathiellales	f__Sneathiellaceae	g__Sneathiella	s__Sneathiella marina	d__Bacteria	4067215	49.2364	1	0	0	0	0	200	0	0	0	0
GB_GCA_023457435.1	TRUE	p__Pseudomonadota	c__Alphaproteobacteria	o__Rhizobiales	f__Rhizobiaceae	g__RCIO01	s__RCIO01 sp023457435	d__Bacteria	3915436	65.3141	1	0	0	0	0	193	0	0	0	0
GB_GCA_001774555.1	FALSE	p__Patescibacteria	c__Microgenomatia	o__UBA1400	f__MFAQ01	g__2-01-FULL-50-23	s__2-01-FULL-50-23 sp001774555	d__Bacteria	750015	49.8541	0	0	0	0	0	0	0	0	0	0
RS_GCF_900108555.1	TRUE	p__Bacillota_A	c__Clostridia	o__Oscillospirales	f__Ruminococcaceae	g__Ruminococcus	s__Ruminococcus flavefaciens_P	d__Bacteria	3663705	43.1962	1	0	0	0	0	175	0	0	0	0
RS_GCF_900142955.1	TRUE	p__Bacillota_A	c__Clostridia	o__Lachnospirales	f__Lachnospiraceae	g__Anaerosporobacter	s__Anaerosporobacter mobilis	d__Bacteria	5217774	34.9422	1	0	0	0	0	177	0	0	0	0
RS_GCF_001696685.1	TRUE	p__Bacillota	c__Bacilli	o__Staphylococcales	f__Salinicoccaceae	g__Nosocomiicoccus	s__Nosocomiicoccus ampullae_A	d__Bacteria	1578043	36.2456	1	0	0	0	0	184	0	0	0	0
RS_GCF_000964685.1	FALSE	p__Pseudomonadota	c__Alphaproteobacteria	o__Rickettsiales	f__Anaplasmataceae	g__Anaplasma	s__Anaplasma phagocytophilum	d__Bacteria	1479407	41.6438	0	0	0	0	0	0	0	0	0	0
RS_GCF_900111275.1	TRUE	p__Pseudomonadota	c__Alphaproteobacteria	o__Rhizobiales	f__Rhizobiaceae	g__Ferranicluibacter	s__Ferranicluibacter sp900111275	d__Bacteria	5403036	61.9954	1	0	0	0	0	190	0	0	0	0
GB_GCA_002898275.1	FALSE	p__Pseudomonadota	c__Alphaproteobacteria	o__Geminicoccales	f__Geminicoccaceae	g__HRBIN40	s__HRBIN40 sp002898275	d__Bacteria	2892134	68.5751	0	0	0	0	0	0	0	0	0	0
RS_GCF_002979755.1	TRUE	p__Bacteroidota	c__Bacteroidia	o__Flavobacteriales	f__Weeksellaceae	g__Chryseobacterium	s__Chryseobacterium culicis_A	d__Bacteria	5011784	36.1171	1	0	0	0	0	96	0	0	0	0
RS_GCF_001583695.1	TRUE	p__Bacillota	c__Bacilli	o__Bacillales	f__Bacillaceae_G	g__Bacillus_A	s__Bacillus_A wiedmannii	d__Bacteria	5337981	35.1935	1	0	0	0	0	180	0	0	0	0
GB_GCA_002417975.1	TRUE	p__Actinomycetota	c__Coriobacteriia	o__Coriobacteriales	f__Eggerthellaceae	g__UBA5808	s__UBA5808 sp002417975	d__Bacteria	1960267	46.3834	1	0	0	0	0	188	0	0	0	0
GB_GCA_013001705.1	TRUE	p__Bacteroidota	c__Bacteroidia	o__Flavobacteriales	f__JABDKJ01	g__JABDLZ01	s__JABDLZ01 sp013001705	d__Bacteria	2758749	49.5064	1	0	0	0	0	99	0	0	0	0
GB_GCA_016213435.1	TRUE	p__Bacteroidota	c__Bacteroidia	o__Palsa-948	f__Palsa-948	g__Palsa-948	s__Palsa-948 sp016213435	d__Bacteria	3699702	39.189	2	0	0	0	0	113	0	0	0	0
RS_GCF_000332215.1	TRUE	p__Cyanobacteriota	c__Cyanobacteriia	o__Pseudanabaenales	f__Pseudanabaenaceae	g__Pseudanabaena	s__Pseudanabaena biceps_A	d__Bacteria	5476421	43.1782	1	0	0	0	0	191	0	0	0	0
RS_GCF_000956475.1	TRUE	p__Actinomycetota	c__Actinomycetes	o__Actinomycetales	f__Microbacteriaceae	g__Microbacterium	s__Microbacterium hydrocarbonoxydans_A	d__Bacteria	3953585	68.5184	1	0	0	0	0	218	0	0	0	0
RS_GCF_001423265.1	TRUE	p__Pseudomonadota	c__Alphaproteobacteria	o__Rhizobiales	f__Beijerinckiaceae	g__Methylobacterium	s__Methylobacterium sp001423265	d__Bacteria	4465775	69.6185	1	0	0	0	0	200	0	0	0	0
GB_GCA_016188295.1	FALSE	p__Patescibacteria	c__Paceibacteria	o__UBA9973	f__XYD1-FULL-46-19	g__JACPIA01	s__JACPIA01 sp016188295	d__Bacteria	573798	43.0785	0	0	0	0	0	0	0	0	0	0
GB_GCA_015066345.1	TRUE	p__Bacillota_A	c__Clostridia	o__Oscillospirales	f__Acutalibacteraceae	g__DTU089	s__DTU089 sp015066345	d__Bacteria	2334147	39.4277	1	0	0	0	0	174	0	0	0	0
GB_GCA_000010565.1	TRUE	p__Bacillota_B	c__Desulfotomaculia	o__Desulfotomaculales	f__Pelotomaculaceae	g__Pelotomaculum	s__Pelotomaculum thermopropionicum	d__Bacteria	3025375	52.9611	1	0	0	0	0	175	0	0	0	0
RS_GCF_030435705.1	TRUE	p__Pseudomonadota	c__Alphaproteobacteria	o__Rhizobiales	f__Rhizobiaceae	g__Neorhizobium	s__Neorhizobium sp024007765	d__Bacteria	5475343	62.1629	1	0	0	0	0	190	0	0	0	0
GB_GCA_024707205.1	TRUE	p__Actinomycetota	c__Actinomycetes	o__Actinomycetales	f__Demequinaceae	g__Demequina	s__Demequina sp024707205	d__Bacteria	2538242	68.0573	1	0	0	0	0	221	0	0	0	0
GB_GCA_002150995.1	TRUE	p__Actinomycetota	c__Actinomycetes	o__Actinomycetales	f__Microbacteriaceae	g__Clavibacter	s__Clavibacter michiganensis_K	d__Bacteria	3268273	73.574	1	0	0	0	0	229	0	0	0	0
RS_GCF_009936375.1	TRUE	p__Pseudomonadota	c__Alphaproteobacteria	o__Rhizobiales	f__Beijerinckiaceae	g__Methylosinus	s__Methylosinus sp009936375	d__Bacteria	4706935	64.8073	1	0	0	0	0	186	0	0	0	0
GB_GCA_013374855.1	FALSE	p__Patescibacteria	c__Microgenomatia	o__GWA2-44-7	f__UBA8517	g__Ch104c	s__Ch104c sp013374855	d__Bacteria	802554	36.2252	0	0	0	0	0	0	0	0	0	0
RS_GCF_900104215.1	TRUE	p__Desulfobacterota	c__Desulfovibrionia	o__Desulfovibrionales	f__Desulfonatronaceae	g__Desulfonatronum	s__Desulfonatronum thiosulfatophilum	d__Bacteria	3602125	56.1965	1	0	0	0	0	181	0	0	0	0
RS_GCF_029269135.1	TRUE	p__Pseudomonadota	c__Gammaproteobacteria	o__Pseudomonadales	f__Pseudomonadaceae	g__Pseudomonas_E	s__Pseudomonas_E sp002840155	d__Bacteria	4400820	60.8558	1	0	2	0	0	102	0	71	0	0
RS_GCF_900109755.1	TRUE	p__Pseudomonadota	c__Gammaproteobacteria	o__Pseudomonadales	f__Pseudomonadaceae	g__Pseudomonas_E	s__Pseudomonas_E agarici	d__Bacteria	5508099	58.9853	1	0	1	0	0	101	0	71	0	0
RS_GCF_000474945.1	TRUE	p__Pseudomonadota	c__Gammaproteobacteria	o__Nevskiales	f__Nevskiaceae	g__Solimonas	s__Solimonas soli	d__Bacteria	4186503	68.5095	1	0	0	0	0	106	0	0	0	0
RS_GCF_900100605.1	TRUE	p__Actinomycetota	c__Actinomycetes	o__Streptosporangiales	f__Streptosporangiaceae	g__Sinosporangium	s__Sinosporangium album	d__Bacteria	7057140	69.3	1	0	0	0	0	227	0	0	0	0
RS_GCF_900094555.1	TRUE	p__Pseudomonadota	c__Alphaproteobacteria	o__Rhizobiales	f__Rhizobiaceae	g__Rhizobium	s__Rhizobium hainanense	d__Bacteria	7252624	59.6495	1	0	0	0	0	191	0	0	0	0
RS_GCF_000473205.1	TRUE	p__Pseudomonadota	c__Alphaproteobacteria	o__Rhodobacterales	f__Rhodobacteraceae	g__Pseudophaeobacter	s__Pseudophaeobacter arcticus	d__Bacteria	5049234	59.2692	1	0	0	0	0	189	0	0	0	0
GB_GCA_012271135.1	TRUE	p__Chloroflexota	c__Anaerolineae	o__Caldilineales	f__Caldilineaceae	g__Bin34	s__Bin34 sp012271135	d__Bacteria	4046059	62.382	1	0	0	0	0	187	0	0	0	0
GB_GCA_944381085.1	TRUE	p__Bacillota_A	c__Clostridia	o__Oscillospirales	f__CAG-272	g__CAG-448	s__CAG-448 sp944381085	d__Bacteria	2713427	43.7341	1	0	0	0	0	178	0	0	0	0
GB_GCA_002414185.1	FALSE	p__Patescibacteria	c__JAEDAM01	o__Absconditabacterales	f__Absconditicoccaceae	g__UBA5124	s__UBA5124 sp002414185	d__Bacteria	1046312	31.298	0	0	0	0	0	0	0	0	0	0
RS_GCF_001936475.1	TRUE	p__Bacteroidota	c__Bacteroidia	o__Cytophagales	f__Cyclobacteriaceae	g__Algoriphagus	s__Algoriphagus marinus	d__Bacteria	4873280	39.5434	1	0	0	0	0	101	0	0	0	0
RS_GCF_001644035.1	TRUE	p__Pseudomonadota	c__Gammaproteobacteria	o__Methylococcales	f__Methylomonadaceae	g__Methylomonas	s__Methylomonas methanica_A	d__Bacteria	5407230	51.2876	1	0	0	0	0	96	0	0	0	0
GB_GCA_009926205.1	TRUE	p__Pseudomonadota	c__Gammaproteobacteria	o__Burkholderiales	f__Methylophilaceae	g__RFPI01	s__RFPI01 sp009926205	d__Bacteria	1506408	45.4843	1	0	0	0	0	108	0	0	0	0
RS_GCF_003340565.1	TRUE	p__Pseudomonadota	c__Alphaproteobacteria	o__Rhodobacterales	f__Rhodobacteraceae	g__HLUCCA09	s__HLUCCA09 sp003340565	d__Bacteria	4529615	70.7768	1	0	0	0	0	207	0	0	0	0
RS_GCF_002993965.1	FALSE	p__Bacillota	c__Bacilli	o__Lactobacillales	f__Lactobacillaceae	g__Apilactobacillus	s__Apilactobacillus timberlakei	d__Bacteria	1542971	30.5286	0	0	0	0	0	0	0	0	0	0
RS_GCF_001482195.1	TRUE	p__Pseudomonadota	c__Gammaproteobacteria	o__Xanthomonadales	f__Xanthomonadaceae	g__Luteimonas_D	s__Luteimonas_D abyssi	d__Bacteria	3988191	69.2561	1	0	0	0	0	108	0	0	0	0
GB_GCA_013112555.1	TRUE	p__Planctomycetota	c__Phycisphaerae	o__Phycisphaerales	f__UBA5793	g__PNC21	s__PNC21 sp013112555	d__Bacteria	4552390	59.9415	1	0	0	0	0	99	0	0	0	0
RS_GCF_001642695.1	TRUE	p__Actinomycetota	c__Actinomycetes	o__Streptomycetales	f__Streptomycetaceae	g__Streptomyces	s__Streptomyces chilikensis	d__Bacteria	7121774	73.2901	1	0	0	0	0	232	0	0	0	0
GB_GCA_026395675.1	TRUE	p__Patescibacteria	c__ABY1	o__CAIXNZ01	f__CAIXNZ01	g__JAPLYF01	s__JAPLYF01 sp026395675	d__Bacteria	1043565	36.7729	1	0	0	0	0	105	0	0	0	0
GB_GCA_002101205.1	TRUE	p__Pseudomonadota	c__Gammaproteobacteria	o__Methylococcales	f__Cycloclasticaceae	g__Cycloclasticus	s__Cycloclasticus sp002101205	d__Bacteria	1916434	42.7373	1	0	0	0	0	96	0	0	0	0
GB_GCA_004322215.1	FALSE	p__Bacteroidota	c__Kapaibacteriia	o__Kapaibacteriales	f__UBA2268	g__XYC2-FULL-35-21	s__XYC2-FULL-35-21 sp004322215	d__Bacteria	4198283	34.5967	0	0	0	0	0	0	0	0	0	0
GB_GCA_014879535.1	TRUE	p__Verrucomicrobiota	c__Verrucomicrobiae	o__Chthoniobacterales	f__JACTMZ01	g__JACTMZ01	s__JACTMZ01 sp014879535	d__Bacteria	3166665	63.5432	1	0	0	0	0	115	0	0	0	0
GB_GCA_000238975.1	FALSE	p__Pseudomonadota	c__Gammaproteobacteria	o__Enterobacterales	f__Enterobacteriaceae	g__Serratia_D	s__Serratia_D symbiotica_A	d__Bacteria	1762765	29.2262	0	0	0	0	0	0	0	0	0	0
RS_GCF_004365655.1	TRUE	p__Bacteroidota	c__Bacteroidia	o__Flavobacteriales	f__Weeksellaceae	g__Epilithonimonas	s__Epilithonimonas xixisoli	d__Bacteria	3389369	36.2103	1	0	0	0	0	96	0	0	0	0
GB_GCA_023428245.1	TRUE	p__Myxococcota	c__Polyangia	o__Polyangiales	f__Polyangiaceae	g__NIC37A-2	s__NIC37A-2 sp023428245	d__Bacteria	4899300	63.1738	1	0	0	0	0	117	0	0	0	0
GB_GCA_945871915.1	TRUE	p__Planctomycetota	c__Phycisphaerae	o__Phycisphaerales	f__SM1A02	g__SYAC01	s__SYAC01 sp945871915	d__Bacteria	2240218	56.5433	1	0	0	0	0	117	0	0	0	0
GB_GCA_903822185.1	TRUE	p__Pseudomonadota	c__Alphaproteobacteria	o__ATCC43930	f__Stellaceae	g__CAIKMD01	s__CAIKMD01 sp903822185	d__Bacteria	4266092	60.9665	0	1	0	0	0	0	108	0	0	0
GB_GCA_902563105.1	FALSE	p__Pseudomonadota	c__Gammaproteobacteria	o__SAR86	f__AG-339-G14	g__MEDG-81	s__MEDG-81 sp902563105	d__Bacteria	1201112	34.4138	0	0	0	0	0	0	0	0	0	0
GB_GCA_900317385.1	TRUE	p__Bacillota_A	c__Clostridia	o__Oscillospirales	f__Oscillospiraceae	g__RUG626	s__RUG626 sp900317385	d__Bacteria	1680784	54.9264	1	0	0	0	0	179	0	0	0	0
GB_GCA_002333405.1	TRUE	p__Actinomycetota	c__Actinomycetes	o__Actinomycetales	f__Microbacteriaceae	g__Aquiluna	s__Aquiluna sp002333405	d__Bacteria	1262119	53.5026	1	0	0	0	0	207	0	0	0	0
RS_GCF_022179225.1	TRUE	p__Pseudomonadota	c__Alphaproteobacteria	o__Rhizobiales	f__Beijerinckiaceae	g__Methylobacterium	s__Methylobacterium goesingense	d__Bacteria	5334262	68.8031	1	0	0	0	0	203	0	0	0	0
RS_GCF_000423865.1	TRUE	p__Nitrospirota	c__Thermodesulfovibrionia	o__Thermodesulfovibrionales	f__Thermodesulfovibrionaceae	g__Thermodesulfovibrio	s__Thermodesulfovibrio thiophilus	d__Bacteria	1871474	34.431	1	0	0	0	0	173	0	0	0	0
RS_GCF_010993745.1	TRUE	p__Actinomycetota	c__Actinomycetes	o__Mycobacteriales	f__HKI-0501	g__Fodinicola	s__Fodinicola acaciae	d__Bacteria	8860993	67.809	1	0	0	0	0	235	0	0	0	0
GB_GCA_903840355.1	TRUE	p__Verrucomicrobiota	c__Verrucomicrobiae	o__Opitutales	f__UBA953	g__UBA953	s__UBA953 sp903840355	d__Bacteria	2271658	54.4643	1	0	0	0	0	119	0	0	0	0
GB_GCA_900541235.1	TRUE	p__Actinomycetota	c__Coriobacteriia	o__Coriobacteriales	f__Coriobacteriaceae	g__Collinsella	s__Collinsella sp900541235	d__Bacteria	2150145	60.0693	1	0	0	0	0	194	0	0	0	0
GB_GCA_025464005.1	FALSE	p__Actinomycetota	c__Acidimicrobiia	o__Acidimicrobiales	f__Bog-793	g__RYN-46	s__RYN-46 sp025464005	d__Bacteria	3904121	67.9976	0	0	0	0	0	0	0	0	0	0
RS_GCF_002287375.1	TRUE	p__Bacillota	c__Bacilli	o__Bacillales_D	f__Amphibacillaceae	g__Virgibacillus_G	s__Virgibacillus_G profundi	d__Bacteria	4362047	37.2471	1	0	0	0	0	185	0	0	0	0
RS_GCF_016756745.1	TRUE	p__Synergistota	c__Synergistia	o__Synergistales	f__Aminobacteriaceae	g__Aminivibrio	s__Aminivibrio sp016756745	d__Bacteria	2941343	58.6607	1	0	0	0	0	180	0	0	0	0
GB_GCA_026995265.1	TRUE	p__Pseudomonadota	c__Alphaproteobacteria	o__Rhodobacterales	f__Rhodobacteraceae	g__UBA3077	s__UBA3077 sp026995265	d__Bacteria	3113668	59.4953	1	0	0	0	0	189	0	0	0	0
RS_GCF_000380005.1	TRUE	p__Bacillota	c__Bacilli	o__Lactobacillales	f__Streptococcaceae	g__Streptococcus	s__Streptococcus didelphis	d__Bacteria	1877438	35.7808	1	0	0	0	0	182	0	0	0	0
RS_GCF_003149745.1	TRUE	p__Bacteroidota	c__Bacteroidia	o__Flavobacteriales	f__Flavobacteriaceae	g__Flagellimonas	s__Flagellimonas koreensis	d__Bacteria	3614652	37.622	1	1	0	0	0	100	99	0	0	0
GB_GCA_018401935.1	TRUE	p__Bacteroidota	c__Rhodothermia	o__Balneolales	f__Balneolaceae	g__UBA1275	s__UBA1275 sp018401935	d__Bacteria	2600685	41.9712	1	0	0	0	0	98	0	0	0	0
RS_GCF_024704385.1	TRUE	p__Actinomycetota	c__Actinomycetes	o__Actinomycetales	f__Cellulomonadaceae	g__JAJDFX01	s__JAJDFX01 sp002441315	d__Bacteria	4424939	71.2693	1	0	0	0	0	206	0	0	0	0
RS_GCF_021602025.1	TRUE	p__Pseudomonadota	c__Gammaproteobacteria	o__Pseudomonadales	f__Pseudomonadaceae	g__Pseudomonas_E	s__Pseudomonas_E ceruminis	d__Bacteria	6332233	61.6768	1	0	1	0	0	102	0	71	0	0
GB_GCA_023384095.1	FALSE	p__Pseudomonadota	c__Alphaproteobacteria	o__Rhizobiales	f__Hyphomicrobiaceae	g__ZC4RG25	s__ZC4RG25 sp023384095	d__Bacteria	4583839	67.4208	0	0	0	0	0	0	0	0	0	0
RS_GCF_003344765.1	TRUE	p__Pseudomonadota	c__Alphaproteobacteria	o__Kiloniellales	f__Rhodovibrionaceae	g__Ferruginivarius	s__Ferruginivarius sediminum	d__Bacteria	4233556	65.5749	2	0	0	0	0	208	0	0	0	0
GB_GCA_025800125.1	TRUE	p__Pseudomonadota	c__Gammaproteobacteria	o__Pseudomonadales	f__Nitrincolaceae	g__Marinobacterium_C	s__Marinobacterium_C sp025800125	d__Bacteria	4482114	52.109	1	0	1	0	0	96	0	68	0	0
RS_GCF_016598485.1	TRUE	p__Actinomycetota	c__Actinomycetes	o__Mycobacteriales	f__Micromonosporaceae	g__Micromonospora	s__Micromonospora veneta	d__Bacteria	6799777	72.3628	1	0	0	0	0	216	0	0	0	0
GB_GCA_937894725.1	TRUE	p__Bacteroidota	c__Bacteroidia	o__Chitinophagales	f__LD1	g__CALAYL01	s__CALAYL01 sp937894725	d__Bacteria	3081998	38.5833	1	0	0	0	0	99	0	0	0	0
RS_GCF_016027715.1	TRUE	p__Bacillota	c__Bacilli	o__Lactobacillales	f__Streptococcaceae	g__Lactococcus	s__Lactococcus garvieae_A	d__Bacteria	2110259	38.0939	2	0	0	0	0	185	0	0	0	0
RS_GCF_000238255.3	TRUE	p__Pseudomonadota	c__Gammaproteobacteria	o__Enterobacterales	f__Alteromonadaceae	g__Pseudoalteromonas	s__Pseudoalteromonas spongiae	d__Bacteria	4752413	40.8616	1	0	1	0	0	95	0	56	0	0
RS_GCF_016798325.1	TRUE	p__Pseudomonadota	c__Gammaproteobacteria	o__Pseudomonadales	f__Oleiphilaceae	g__Marinobacter_A	s__Marinobacter_A mangrovi	d__Bacteria	4649115	61.0709	1	0	2	0	0	102	0	69	0	0
GB_GCA_950096965.1	TRUE	p__Bacillota_A	c__Clostridia	o__TANB77	f__CAG-508	g__UMGS1663	s__UMGS1663 sp950096965	d__Bacteria	2001560	27.6003	1	0	0	0	0	178	0	0	0	0
RS_GCF_002797735.1	TRUE	p__Bacteroidota	c__Bacteroidia	o__Chitinophagales	f__Chitinophagaceae	g__Thermoflavifilum	s__Thermoflavifilum aggregans	d__Bacteria	2841668	46.0373	1	0	0	0	0	100	0	0	0	0
RS_GCF_000158915.1	TRUE	p__Actinomycetota	c__Actinomycetes	o__Streptomycetales	f__Streptomycetaceae	g__Streptomyces	s__Streptomyces himastatinicus	d__Bacteria	11030030	71.2155	1	0	0	0	0	241	0	0	0	0
RS_GCF_003610355.1	TRUE	p__Bacteroidota	c__Bacteroidia	o__Sphingobacteriales	f__Sphingobacteriaceae	g__Sphingobacterium	s__Sphingobacterium detergens	d__Bacteria	6733110	39.8406	1	0	0	0	0	119	0	0	0	0
GB_GCA_944391075.1	FALSE	p__Pseudomonadota	c__Alphaproteobacteria	o__Rickettsiales	f__UBA1997	g__CALXSC01	s__CALXSC01 sp944391075	d__Bacteria	1161439	25.8567	0	0	0	0	0	0	0	0	0	0
GB_GCA_910588185.1	TRUE	p__Bacillota_A	c__Clostridia	o__Peptostreptococcales	f__Anaerovoracaceae	g__Fimisoma	s__Fimisoma sp910588185	d__Bacteria	1976393	37.7029	1	0	0	0	0	174	0	0	0	0
GB_GCA_910577525.1	TRUE	p__Bacillota_A	c__Clostridia	o__Oscillospirales	f__Oscillospiraceae	g__Enterenecus	s__Enterenecus sp910577525	d__Bacteria	2921772	62.1288	1	0	0	0	0	179	0	0	0	0
RS_GCF_017368455.1	TRUE	p__Bacillota_A	c__Clostridia	o__Clostridiales	f__Clostridiaceae	g__Proteiniclasticum	s__Proteiniclasticum aestuarii	d__Bacteria	3184189	45.5699	1	0	0	0	0	178	0	0	0	0
RS_GCF_004310325.1	TRUE	p__Bacteroidota	c__Bacteroidia	o__Flavobacteriales	f__Flavobacteriaceae	g__Jejuia	s__Jejuia flava	d__Bacteria	3807999	34.9907	1	1	0	0	0	100	99	0	0	0
RS_GCF_022953055.1	TRUE	p__Bacteroidota	c__Bacteroidia	o__Sphingobacteriales	f__Sphingobacteriaceae	g__Mucilaginibacter	s__Mucilaginibacter straminoryzae	d__Bacteria	4760158	44.6831	1	0	0	0	0	117	0	0	0	0
GB_GCA_001999425.1	TRUE	p__Pseudomonadota	c__Gammaproteobacteria	o__Enterobacterales	f__Pasteurellaceae	g__Rodentibacter	s__Rodentibacter sp001999425	d__Bacteria	2512928	39.8447	0	1	0	0	0	0	106	0	0	0
RS_GCF_021261325.1	TRUE	p__Actinomycetota	c__Actinomycetes	o__Streptomycetales	f__Streptomycetaceae	g__Streptomyces	s__Streptomyces guryensis	d__Bacteria	10492733	70.3093	1	0	0	0	0	230	0	0	0	0
RS_GCF_005491205.1	TRUE	p__Pseudomonadota	c__Gammaproteobacteria	o__Enterobacterales	f__Enterobacteriaceae	g__Chimaeribacter	s__Chimaeribacter sp005491205	d__Bacteria	5030936	60.017	1	1	0	0	0	95	111	0	0	0
RS_GCF_017316125.1	TRUE	p__Bacillota	c__Bacilli	o__Lactobacillales	f__Enterococcaceae	g__Enterococcus_B	s__Enterococcus_B sp017316125	d__Bacteria	2603365	36.1998	1	0	0	0	0	184	0	0	0	0
RS_GCF_006335005.1	TRUE	p__Actinomycetota	c__Actinomycetes	o__Propionibacteriales	f__Nocardioidaceae	g__Nocardioides	s__Nocardioides albidus	d__Bacteria	4483902	71.8855	1	0	0	0	0	208	0	0	0	0
GB_GCA_026419655.1	TRUE	p__Armatimonadota	c__UBA5377	o__UBA5377	f__FEN-943	g__JANZZA01	s__JANZZA01 sp026419655	d__Bacteria	3950644	61.5843	1	0	0	0	0	177	0	0	0	0
GB_GCA_009773155.1	TRUE	p__Elusimicrobiota	c__Elusimicrobia	o__Elusimicrobiales	f__UBA9959	g__UBA2231	s__UBA2231 sp009773155	d__Bacteria	2757479	62.8601	1	0	0	0	0	173	0	0	0	0
GB_GCA_019192445.1	TRUE	p__Pseudomonadota	c__Gammaproteobacteria	o__Nevskiales	f__Oceanococcaceae	g__MS8	s__MS8 sp019192445	d__Bacteria	3532557	58.4734	1	0	0	0	0	110	0	0	0	0
RS_GCF_001421565.1	TRUE	p__Actinomycetota	c__Actinomycetes	o__Actinomycetales	f__Microbacteriaceae	g__Agromyces	s__Agromyces sp001421565	d__Bacteria	4428049	70.6375	1	0	0	0	0	233	0	0	0	0
RS_GCF_022836475.1	TRUE	p__Bacillota	c__Bacilli	o__Lactobacillales	f__Lactobacillaceae	g__Ligilactobacillus	s__Ligilactobacillus pabuli	d__Bacteria	2348930	41.5404	1	0	0	0	0	183	0	0	0	0
RS_GCF_013404085.1	TRUE	p__Bacteroidota	c__Bacteroidia	o__Flavobacteriales	f__Flavobacteriaceae	g__Winogradskyella	s__Winogradskyella helgolandensis	d__Bacteria	4598621	33.132	1	2	0	0	0	100	100	0	0	0
RS_GCF_003061005.1	TRUE	p__Pseudomonadota	c__Gammaproteobacteria	o__Pseudomonadales	f__Pseudomonadaceae	g__Pseudomonas_E	s__Pseudomonas_E sp003061005	d__Bacteria	5954435	60.283	1	0	1	0	0	102	0	71	0	0
GB_GCA_023150875.1	TRUE	p__Myxococcota	c__UBA796	o__UBA9615	f__JAKLKC01	g__JAKLKC01	s__JAKLKC01 sp023150875	d__Bacteria	6920249	73.7835	2	0	0	0	0	145	0	0	0	0
RS_GCF_004634215.1	TRUE	p__Deinococcota	c__Deinococci	o__Deinococcales	f__Deinococcaceae	g__Deinococcus	s__Deinococcus fonticola	d__Bacteria	3905537	63.9259	1	0	0	0	0	186	0	0	0	0
GB_GCA_025456145.1	TRUE	p__Acidobacteriota	c__Thermoanaerobaculia	o__Thermoanaerobaculales	f__Sulfomarinibacteraceae	g__JAHECW01	s__JAHECW01 sp025456145	d__Bacteria	4555191	70.927	1	0	0	0	0	181	0	0	0	0
GB_GCA_944383295.1	TRUE	p__Bacillota_A	c__Clostridia	o__Christensenellales	f__UBA1242	g__UBA7867	s__UBA7867 sp944383295	d__Bacteria	1047912	32.2347	1	0	0	0	0	180	0	0	0	0
RS_GCF_001651805.1	TRUE	p__Pseudomonadota	c__Gammaproteobacteria	o__Pseudomonadales	f__Nitrincolaceae	g__Marinobacterium_A	s__Marinobacterium_A aestuarii	d__Bacteria	5191608	58.7916	1	0	0	0	0	96	0	0	0	0
RS_GCF_900302485.1	TRUE	p__Pseudomonadota	c__Alphaproteobacteria	o__Rhodobacterales	f__Rhodobacteraceae	g__Aliiroseovarius	s__Aliiroseovarius pelagivivens	d__Bacteria	3331553	58.1072	1	0	0	0	0	192	0	0	0	0
RS_GCF_014490785.1	TRUE	p__Pseudomonadota	c__Gammaproteobacteria	o__Enterobacterales	f__Enterobacteriaceae	g__Kosakonia	s__Kosakonia sp014490785	d__Bacteria	5194957	54.9148	1	1	1	1	0	95	111	55	45	0
RS_GCF_000420025.1	TRUE	p__Actinomycetota	c__Thermoleophilia	o__Solirubrobacterales	f__Solirubrobacteraceae	g__Patulibacter	s__Patulibacter americanus	d__Bacteria	4470560	74.435	1	0	0	0	0	122	0	0	0	0
RS_GCF_013409785.1	TRUE	p__Actinomycetota	c__Actinomycetes	o__Actinomycetales	f__Microbacteriaceae	g__Microbacterium	s__Microbacterium immunditiarum	d__Bacteria	3906867	69.9842	1	0	0	0	0	217	0	0	0	0
RS_GCF_022410465.1	TRUE	p__Bacteroidota	c__Bacteroidia	o__Flavobacteriales	f__Flavobacteriaceae	g__Gramella	s__Gramella crocea	d__Bacteria	3902243	39.5178	1	2	0	0	0	100	99	0	0	0
RS_GCF_000735345.1	TRUE	p__Pseudomonadota	c__Gammaproteobacteria	o__Enterobacterales	f__Enterobacteriaceae	g__Ewingella	s__Ewingella americana	d__Bacteria	4867810	53.8951	1	1	0	0	0	95	113	0	0	0
RS_GCF_014843355.1	TRUE	p__Pseudomonadota	c__Gammaproteobacteria	o__Enterobacterales	f__Pasteurellaceae	g__Basfia_A	s__Basfia_A sp014843355	d__Bacteria	2464558	45.9943	0	1	0	0	0	0	106	0	0	0
GB_GCA_016718825.1	TRUE	p__Bacteroidota	c__Bacteroidia	o__J057	f__JADKCL01	g__JADKCL01	s__JADKCL01 sp016718825	d__Bacteria	7698138	50.9388	1	0	0	0	0	98	0	0	0	0
GB_GCA_016184225.1	FALSE	p__Patescibacteria	c__Microgenomatia	o__Daviesbacterales	f__UBA10151	g__UBA10151	s__UBA10151 sp016184225	d__Bacteria	942259	40.6476	0	0	0	0	0	0	0	0	0	0
GB_GCA_018816945.1	TRUE	p__Bacteroidota	c__Bacteroidia	o__Bacteroidales	f__GCA-2711565	g__GCA-2711565	s__GCA-2711565 sp018816945	d__Bacteria	4139065	35.734	1	0	0	0	0	98	0	0	0	0
GB_GCA_016721725.1	TRUE	p__Bacteroidota	c__Bacteroidia	o__Chitinophagales	f__Chitinophagaceae	g__Ferruginibacter	s__Ferruginibacter sp016721725	d__Bacteria	3581485	49.3542	1	0	0	0	0	99	0	0	0	0
GB_GCA_027490925.1	TRUE	p__Pseudomonadota	c__Gammaproteobacteria	o__Burkholderiales	f__Burkholderiaceae	g__PCRC01	s__PCRC01 sp027490925	d__Bacteria	2766400	63.9733	1	0	0	0	0	109	0	0	0	0
GB_GCA_003194495.1	TRUE	p__Desulfobacterota	c__Dissulfuribacteria	o__Dissulfuribacterales	f__UBA3076	g__UBA3076	s__UBA3076 sp003194495	d__Bacteria	3571848	46.8394	1	0	0	0	0	176	0	0	0	0
GB_GCA_022574555.1	FALSE	p__SAR324	c__SAR324	o__SAR324	f__JACQKK01	g__JACZRV01	s__JACZRV01 sp022574555	d__Bacteria	4225250	59.2169	0	0	0	0	0	0	0	0	0	0
RS_GCF_004331485.1	TRUE	p__Actinomycetota	c__Actinomycetes	o__Propionibacteriales	f__Kribbellaceae	g__Kribbella	s__Kribbella capetownensis	d__Bacteria	8831527	68.2736	1	0	0	0	0	207	0	0	0	0
RS_GCF_009917385.1	TRUE	p__Bacillota	c__Bacilli	o__Bacillales_D	f__Amphibacillaceae	g__Virgibacillus	s__Virgibacillus sp009917385	d__Bacteria	4539479	37.3306	1	0	0	0	0	185	0	0	0	0
GB_GCA_002299915.1	TRUE	p__Pseudomonadota	c__Gammaproteobacteria	o__Nitrosococcales	f__Methylophagaceae	g__UBA652	s__UBA652 sp002299915	d__Bacteria	1890107	44.4208	1	0	0	0	0	108	0	0	0	0
RS_GCF_030296595.1	TRUE	p__Actinomycetota	c__Actinomycetes	o__Actinomycetales	f__Microbacteriaceae	g__Naasia	s__Naasia aerilata	d__Bacteria	3391135	71.1508	1	0	0	0	0	243	0	0	0	0
RS_GCF_000012885.1	TRUE	p__Desulfobacterota	c__Desulfuromonadia	o__Desulfuromonadales	f__Syntrophotaleaceae	g__Syntrophotalea	s__Syntrophotalea carbinolica	d__Bacteria	3665893	55.1137	1	0	0	0	0	182	0	0	0	0
GB_GCA_902800015.1	FALSE	p__Bacillota_I	c__Bacilli_A	o__Mycoplasmatales	f__Mycoplasmoidaceae	g__Malacoplasma_A	s__Malacoplasma_A sp902800015	d__Bacteria	567903	27.6102	0	0	0	0	0	0	0	0	0	0
GB_GCA_903919455.1	FALSE	p__Actinomycetota	c__Acidimicrobiia	o__Acidimicrobiales	f__Ilumatobacteraceae	g__UBA668	s__UBA668 sp903919455	d__Bacteria	3546877	65.8816	0	0	0	0	0	0	0	0	0	0
RS_GCF_008636115.1	FALSE	p__Pseudomonadota	c__Alphaproteobacteria	o__Rhizobiales	f__Rhizobiaceae	g__QLZD01	s__QLZD01 sp008636115	d__Bacteria	1969927	51.5948	0	0	0	0	0	0	0	0	0	0
GB_GCA_900557045.1	TRUE	p__Bacillota_A	c__Clostridia	o__TANB77	f__CAG-508	g__CAG-492	s__CAG-492 sp900557045	d__Bacteria	1673380	26.9036	1	0	0	0	0	178	0	0	0	0
RS_GCF_001434095.1	TRUE	p__Bacillota	c__Bacilli	o__Lactobacillales	f__Lactobacillaceae	g__Fructilactobacillus	s__Fructilactobacillus fructivorans	d__Bacteria	1372365	38.8844	1	0	0	0	0	189	0	0	0	0
RS_GCF_000153725.1	TRUE	p__Pseudomonadota	c__Alphaproteobacteria	o__Rhodobacterales	f__Rhodobacteraceae	g__Salipiger	s__Salipiger bermudensis	d__Bacteria	5482983	66.441	1	0	0	0	0	187	0	0	0	0
RS_GCF_900155945.1	TRUE	p__Pseudomonadota	c__Gammaproteobacteria	o__Pseudomonadales	f__Nitrincolaceae	g__Marinobacterium	s__Marinobacterium stanieri	d__Bacteria	4680330	55.5806	1	0	1	0	0	96	0	68	0	0
RS_GCF_004339675.1	TRUE	p__Pseudomonadota	c__Alphaproteobacteria	o__Rhodobacterales	f__Rhodobacteraceae	g__Rhodovulum	s__Rhodovulum steppense	d__Bacteria	3665949	67.2799	1	0	0	0	0	187	0	0	0	0
GB_GCA_902605865.1	FALSE	p__Pseudomonadota	c__Alphaproteobacteria	o__Pelagibacterales	f__Pelagibacteraceae	g__Pelagibacter	s__Pelagibacter sp902605865	d__Bacteria	1244271	29.5301	0	0	0	0	0	0	0	0	0	0
GB_GCA_902517615.1	FALSE	p__Pseudomonadota	c__Alphaproteobacteria	o__Pelagibacterales	f__Pelagibacteraceae	g__Pelagibacter	s__Pelagibacter sp902517615	d__Bacteria	1317451	29.1546	0	0	0	0	0	0	0	0	0	0
RS_GCF_902728265.1	TRUE	p__Bacteroidota	c__Bacteroidia	o__Flavobacteriales	f__Weeksellaceae	g__Chryseobacterium	s__Chryseobacterium potabilaquae	d__Bacteria	4348941	32.6037	1	0	0	0	0	96	0	0	0	0
RS_GCF_901538355.1	TRUE	p__Planctomycetota	c__Planctomycetia	o__Gemmatales	f__Gemmataceae	g__Tuwongella	s__Tuwongella immobilis	d__Bacteria	6690754	58.1137	1	0	0	0	0	108	0	0	0	0
RS_GCF_001654865.1	TRUE	p__Pseudomonadota	c__Gammaproteobacteria	o__Enterobacterales	f__Enterobacteriaceae	g__Buttiauxella	s__Buttiauxella noackiae	d__Bacteria	4803576	49.488	1	1	1	0	0	95	112	55	0	0
RS_GCF_000281975.1	TRUE	p__Pseudomonadota	c__Alphaproteobacteria	o__Sphingomonadales	f__Sphingomonadaceae	g__Novosphingobium	s__Novosphingobium sp000281975	d__Bacteria	5611617	65.9107	1	0	0	0	0	189	0	0	0	0
GB_GCA_030945745.1	FALSE	p__Actinomycetota	c__Acidimicrobiia	o__Acidimicrobiales	f__Palsa-688	g__JALZAH01	s__JALZAH01 sp030945745	d__Bacteria	3456757	69.1965	0	0	0	0	0	0	0	0	0	0
GB_GCA_016283775.1	TRUE	p__Bacillota_A	c__Clostridia	o__Lachnospirales	f__Lachnospiraceae	g__RGIG3528	s__RGIG3528 sp016283775	d__Bacteria	2982212	48.7669	1	0	0	0	0	175	0	0	0	0
GB_GCA_003209655.1	TRUE	p__Cyanobacteriota	c__Cyanobacteriia	o__PCC-6307	f__Cyanobiaceae	g__Prochlorococcus_A	s__Prochlorococcus_A sp003209655	d__Bacteria	1634928	30.7167	1	0	0	0	0	194	0	0	0	0
GB_GCA_012270585.1	FALSE	p__Nitrospirota	c__Nitrospiria	o__Nitrospirales	f__UBA8639	g__Bin75	s__Bin75 sp012270585	d__Bacteria	2503252	55.8042	0	0	0	0	0	0	0	0	0	0
RS_GCF_006459125.1	TRUE	p__Campylobacterota	c__Campylobacteria	o__Campylobacterales	f__Arcobacteraceae	g__Halarcobacter	s__Halarcobacter anaerophilus	d__Bacteria	3016922	30.0037	1	0	0	0	0	180	0	0	0	0
RS_GCF_001543205.1	TRUE	p__Bacillota	c__Bacilli	o__Lactobacillales	f__Aerococcaceae	g__Aerococcus	s__Aerococcus urinaeequi	d__Bacteria	2013339	39.3805	1	0	0	0	0	194	0	0	0	0
RS_GCF_024438035.1	TRUE	p__Actinomycetota	c__Actinomycetes	o__Mycobacteriales	f__Mycobacteriaceae	g__Rhodococcus	s__Rhodococcus sp024438035	d__Bacteria	5814613	65.8396	1	0	0	0	0	227	0	0	0	0
GB_GCA_937870755.1	TRUE	p__Pseudomonadota	c__Alphaproteobacteria	o__Rhizobiales	f__Beijerinckiaceae	g__JAJXWB01	s__JAJXWB01 sp937870755	d__Bacteria	4524885	66.7293	1	0	0	0	0	199	0	0	0	0
RS_GCF_000173775.1	TRUE	p__Pseudomonadota	c__Gammaproteobacteria	o__Enterobacterales	f__Enterobacteriaceae	g__Yersinia	s__Yersinia rohdei	d__Bacteria	4317478	46.9709	1	1	0	0	0	95	120	0	0	0
RS_GCF_000735695.2	TRUE	p__Bacteroidota	c__Bacteroidia	o__Flavobacteriales	f__Weeksellaceae	g__Kaistella	s__Kaistella haifensis	d__Bacteria	2845737	36.8541	1	0	0	0	0	96	0	0	0	0
RS_GCF_900176035.1	TRUE	p__Bacillota_B	c__Peptococcia	o__Peptococcales	f__Desulfonisporaceae	g__Desulfonispora	s__Desulfonispora thiosulfatigenes	d__Bacteria	2412168	31.9217	1	0	0	0	0	179	0	0	0	0
RS_GCF_000411135.1	TRUE	p__Actinomycetota	c__Actinomycetes	o__Actinomycetales	f__Actinomycetaceae	g__Actinotignum	s__Actinotignum schaalii_A	d__Bacteria	2092357	61.0851	1	0	0	0	0	217	0	0	0	0
RS_GCF_003316695.1	TRUE	p__Campylobacterota	c__Campylobacteria	o__Campylobacterales	f__Arcobacteraceae	g__Aliarcobacter	s__Aliarcobacter vitoriensis	d__Bacteria	2426792	27.0342	1	0	0	0	0	180	0	0	0	0
RS_GCF_002263215.1	TRUE	p__Pseudomonadota	c__Gammaproteobacteria	o__Enterobacterales	f__Pasteurellaceae	g__Actinobacillus_B	s__Actinobacillus_B seminis	d__Bacteria	2365053	40.7487	0	1	0	0	0	0	107	0	0	0
RS_GCF_000374425.1	TRUE	p__Pseudomonadota	c__Gammaproteobacteria	o__Pseudomonadales	f__Moraxellaceae	g__Acinetobacter	s__Acinetobacter tjernbergiae	d__Bacteria	3692377	38.5361	1	0	0	0	0	113	0	0	0	0
GB_GCA_017629765.1	TRUE	p__Verrucomicrobiota	c__Verrucomicrobiae	o__Opitutales	f__CAG-312	g__UMGS1490	s__UMGS1490 sp017629765	d__Bacteria	1694899	47.0678	1	0	0	0	0	125	0	0	0	0
RS_GCF_008180415.1	TRUE	p__Bacillota	c__Bacilli	o__Bacillales_B	f__Bacillaceae_B	g__Bacillus_BM	s__Bacillus_BM vietnamensis_B	d__Bacteria	4817581	42.1687	1	0	0	0	0	191	0	0	0	0
RS_GCF_029076445.1	TRUE	p__Actinomycetota	c__Actinomycetes	o__Actinomycetales	f__Micrococcaceae	g__Arthrobacter	s__Arthrobacter sp029076445	d__Bacteria	4559109	65.1723	1	0	0	0	0	241	0	0	0	0
RS_GCF_002096355.1	TRUE	p__Bacillota	c__Bacilli	o__Lactobacillales	f__Streptococcaceae	g__Streptococcus	s__Streptococcus oralis_T	d__Bacteria	1847293	41.2692	1	0	0	0	0	182	0	0	0	0
RS_GCF_001618175.1	TRUE	p__Pseudomonadota	c__Alphaproteobacteria	o__Oceanibaculales	f__Oceanibaculaceae	g__Oceanibaculum	s__Oceanibaculum pacificum	d__Bacteria	3891434	65.6913	1	0	0	0	0	192	0	0	0	0
RS_GCF_009695995.1	TRUE	p__Bacillota_A	c__Clostridia	o__Lachnospirales	f__Lachnospiraceae	g__Acetatifactor	s__Acetatifactor intestinalis	d__Bacteria	2970649	46.2753	1	0	0	0	0	219	0	0	0	0
GB_GCA_021800275.1	TRUE	p__Eremiobacterota	c__JABDET01	o__JABDET01	f__JABDET01	g__JAKAVV01	s__JAKAVV01 sp021800275	d__Bacteria	2463221	40.9235	1	0	0	0	0	169	0	0	0	0
GB_GCA_013289765.1	TRUE	p__Acidobacteriota	c__Terriglobia	o__Terriglobales	f__SbA1	g__Sulfotelmatobacter	s__Sulfotelmatobacter sp013289765	d__Bacteria	4805006	56.1174	1	0	0	0	0	207	0	0	0	0
GB_GCA_913061335.1	TRUE	p__Pseudomonadota	c__Alphaproteobacteria	o__Rhodobacterales	f__Rhodobacteraceae	g__Yoonia	s__Yoonia sp913061335	d__Bacteria	3086631	54.5833	1	0	0	0	0	191	0	0	0	0
RS_GCF_024734405.1	TRUE	p__Actinomycetota	c__Actinomycetes	o__Mycobacteriales	f__Pseudonocardiaceae	g__Saccharopolyspora_C	s__Saccharopolyspora_C gregorii	d__Bacteria	6344421	72.6672	1	0	0	0	0	234	0	0	0	0
GB_GCA_029008595.1	FALSE	p__Bacillota_A	c__Clostridia	o__Oscillospirales	f__Acutalibacteraceae	g__CAKXIK01	s__CAKXIK01 sp029008595	d__Bacteria	2283907	55.4995	0	0	0	0	0	0	0	0	0	0
RS_GCF_008327825.1	TRUE	p__Fusobacteriota	c__Fusobacteriia	o__Fusobacteriales	f__Leptotrichiaceae	g__Leptotrichia	s__Leptotrichia shahii	d__Bacteria	2161166	29.7372	1	0	0	0	0	106	0	0	0	0
GB_GCA_937934465.1	TRUE	p__Armatimonadota	c__Fimbriimonadia	o__Fimbriimonadales	f__GBS-DC	g__GBS-DC	s__GBS-DC sp937934465	d__Bacteria	2414032	61.9483	1	0	0	0	0	192	0	0	0	0
RS_GCF_000720255.1	TRUE	p__Actinomycetota	c__Actinomycetes	o__Streptomycetales	f__Streptomycetaceae	g__Streptomyces	s__Streptomyces griseus_I	d__Bacteria	9889723	70.702	1	0	0	0	0	230	0	0	0	0
RS_GCF_025421715.1	TRUE	p__Actinomycetota	c__Actinomycetes	o__Actinomycetales	f__Microbacteriaceae	g__Microbacterium	s__Microbacterium sp025421715	d__Bacteria	3325306	71.7044	1	0	0	0	0	220	0	0	0	0
RS_GCF_000213055.1	TRUE	p__Actinomycetota	c__Actinomycetes	o__Streptomycetales	f__Streptomycetaceae	g__Streptomyces	s__Streptomyces sp000213055	d__Bacteria	7506727	73.0765	1	0	0	0	0	238	0	0	0	0
RS_GCF_000338875.1	TRUE	p__Pseudomonadota	c__Gammaproteobacteria	o__Enterobacterales	f__Vibrionaceae	g__Vibrio	s__Vibrio mimicus	d__Bacteria	4320286	46.2544	1	1	1	0	0	95	108	57	0	0
GB_GCA_012744475.1	TRUE	p__Planctomycetota	c__Phycisphaerae	o__Sedimentisphaerales	f__SG8-4	g__PLanc-01	s__PLanc-01 sp012744475	d__Bacteria	5747819	62.6134	1	0	0	0	0	108	0	0	0	0
RS_GCF_002836735.1	TRUE	p__Pseudomonadota	c__Gammaproteobacteria	o__Pseudomonadales	f__Moraxellaceae	g__Psychrobacter	s__Psychrobacter sp002836735	d__Bacteria	3360326	42.8316	1	0	0	0	0	126	0	0	0	0
RS_GCF_001642835.1	TRUE	p__Bacteroidota	c__Bacteroidia	o__Flavobacteriales	f__Flavobacteriaceae	g__Tamlana_A	s__Tamlana_A agarivorans	d__Bacteria	3834113	34.7813	1	2	0	0	0	100	100	0	0	0
RS_GCF_009823805.1	TRUE	p__Actinomycetota	c__Actinomycetes	o__Propionibacteriales	f__Nocardioidaceae	g__Nocardioides	s__Nocardioides flavescens	d__Bacteria	4638605	72.7411	1	0	0	0	0	205	0	0	0	0
RS_GCF_003236305.1	TRUE	p__Actinomycetota	c__Actinomycetes	o__Mycobacteriales	f__Micromonosporaceae	g__Micromonospora	s__Micromonospora endophytica	d__Bacteria	6518152	70.8568	1	0	0	0	0	210	0	0	0	0
RS_GCF_004136015.1	TRUE	p__Pseudomonadota	c__Gammaproteobacteria	o__Pseudomonadales	f__Pseudomonadaceae	g__Pseudomonas_E	s__Pseudomonas_E sp004136015	d__Bacteria	6602660	58.7373	1	0	1	0	0	102	0	71	0	0
RS_GCF_016741875.1	TRUE	p__Actinomycetota	c__Actinomycetes	o__Streptomycetales	f__Streptomycetaceae	g__Streptomyces	s__Streptomyces coffeae	d__Bacteria	9896405	70.6802	1	0	0	0	0	230	0	0	0	0
GB_GCA_025057575.1	TRUE	p__Armatimonadota	c__HRBIN17	o__HRBIN17	f__HRBIN17	g__JANXBO01	s__JANXBO01 sp025057575	d__Bacteria	2779926	54.5593	1	0	0	0	0	189	0	0	0	0
GB_GCA_016699995.1	FALSE	p__Patescibacteria	c__Doudnabacteria	o__UBA920	f__UBA920	g__UBA920	s__UBA920 sp016699995	d__Bacteria	943189	44.4299	0	0	0	0	0	0	0	0	0	0
RS_GCF_002727065.1	TRUE	p__Pseudomonadota	c__Alphaproteobacteria	o__Rhizobiales	f__Rhizobiaceae	g__Zhengella	s__Zhengella mangrovi	d__Bacteria	5066330	65.0217	1	0	0	0	0	192	0	0	0	0
GB_GCA_020161395.1	TRUE	p__Bacteroidota	c__Ignavibacteria	o__Ignavibacteriales	f__Ignavibacteriaceae	g__UTCHB3	s__UTCHB3 sp020161395	d__Bacteria	4066688	42.1687	1	0	0	0	0	105	0	0	0	0
RS_GCF_001424265.1	TRUE	p__Pseudomonadota	c__Gammaproteobacteria	o__Burkholderiales	f__Burkholderiaceae	g__Paracidovorax	s__Paracidovorax sp001424265	d__Bacteria	4717897	68.6404	1	0	0	0	0	117	0	0	0	0
GB_GCA_017881465.1	FALSE	p__Gemmatimonadota	c__Gemmatimonadetes	o__Gemmatimonadales	f__Gemmatimonadaceae	g__UBA4720	s__UBA4720 sp017881465	d__Bacteria	2576911	62.3515	0	0	0	0	0	0	0	0	0	0
GB_GCA_025548565.1	TRUE	p__Pseudomonadota	c__Gammaproteobacteria	o__Burkholderiales	f__Burkholderiaceae	g__Duganella	s__Duganella sp025548565	d__Bacteria	7400413	64.4107	1	0	0	0	0	119	0	0	0	0
RS_GCF_000759535.1	TRUE	p__Pseudomonadota	c__Gammaproteobacteria	o__Pseudomonadales	f__Pseudomonadaceae	g__Pseudomonas_E	s__Pseudomonas_E cremoricolorata_A	d__Bacteria	4780403	63.2427	1	0	1	0	0	102	0	71	0	0
GB_GCA_017934745.1	TRUE	p__Spirochaetota	c__Spirochaetia	o__Treponematales	f__Treponemataceae	g__Treponema_D	s__Treponema_D sp017934745	d__Bacteria	3584970	50.2177	1	0	0	0	0	96	0	0	0	0
RS_GCF_003208655.1	TRUE	p__Bacteroidota	c__Bacteroidia	o__Sphingobacteriales	f__Sphingobacteriaceae	g__Pedobacter	s__Pedobacter nutrimenti	d__Bacteria	5716991	41.6477	1	0	0	0	0	115	0	0	0	0
RS_GCF_011761265.1	TRUE	p__Actinomycetota	c__Actinomycetes	o__Actinomycetales	f__Microbacteriaceae	g__Microbacterium	s__Microbacterium halimionae	d__Bacteria	2935457	61.605	1	0	0	0	0	221	0	0	0	0
RS_GCF_900113655.1	TRUE	p__Bacillota_A	c__Clostridia	o__Lachnospirales	f__Lachnospiraceae	g__Pseudobutyrivibrio	s__Pseudobutyrivibrio sp900113655	d__Bacteria	3558369	38.7213	1	0	0	0	0	177	0	0	0	0
RS_GCF_002127535.1	TRUE	p__Pseudomonadota	c__Gammaproteobacteria	o__Enterobacterales	f__Enterobacteriaceae	g__Xenorhabdus	s__Xenorhabdus vietnamensis	d__Bacteria	4666385	42.9876	1	1	1	0	0	95	110	52	0	0
RS_GCF_009557615.1	TRUE	p__Bacteroidota	c__Bacteroidia	o__Sphingobacteriales	f__Sphingobacteriaceae	g__Sphingobacterium	s__Sphingobacterium sp009557615	d__Bacteria	4322926	38.9222	1	0	0	0	0	113	0	0	0	0
RS_GCF_027460265.1	TRUE	p__Actinomycetota	c__Actinomycetes	o__Streptomycetales	f__Streptomycetaceae	g__Streptomyces	s__Streptomyces sp027460265	d__Bacteria	7665203	71.7399	1	0	0	0	0	229	0	0	0	0
GB_GCA_905477545.1	FALSE	p__Actinomycetota	c__Acidimicrobiia	o__Acidimicrobiales	f__Poriferisodaliceae	g__UBA9040	s__UBA9040 sp905477545	d__Bacteria	2577009	47.4989	0	0	0	0	0	0	0	0	0	0
GB_GCA_902636535.1	FALSE	p__Pseudomonadota	c__Alphaproteobacteria	o__Rickettsiales	f__Anaplasmataceae	g__Wolbachia	s__Wolbachia sp902636535	d__Bacteria	1269343	35.1337	0	0	0	0	0	0	0	0	0	0
GB_GCA_947503655.1	TRUE	p__Actinomycetota	c__Actinomycetes	o__Actinomycetales	f__Microbacteriaceae	g__Microbacterium	s__Microbacterium sp947503655	d__Bacteria	3081563	62.9062	1	0	0	0	0	220	0	0	0	0
RS_GCF_001435815.1	TRUE	p__Bacillota	c__Bacilli	o__Lactobacillales	f__Lactobacillaceae	g__Companilactobacillus	s__Companilactobacillus nantensis	d__Bacteria	2914395	36.1766	1	0	0	0	0	182	0	0	0	0
GB_GCA_002698785.1	TRUE	p__Verrucomicrobiota	c__Verrucomicrobiae	o__Verrucomicrobiales	f__DEV007	g__Arctic95D-9	s__Arctic95D-9 sp002698785	d__Bacteria	7015219	52.7301	1	0	0	0	0	195	0	0	0	0
RS_GCF_000525855.1	TRUE	p__Bacillota	c__Bacilli	o__Lactobacillales	f__Listeriaceae	g__Listeria_A	s__Listeria_A cornellensis	d__Bacteria	3347833	41.9491	1	0	0	0	0	187	0	0	0	0
RS_GCF_002902345.1	TRUE	p__Bacillota	c__Bacilli	o__Staphylococcales	f__Staphylococcaceae	g__Staphylococcus	s__Staphylococcus arlettae	d__Bacteria	2665344	33.4801	1	0	0	0	0	189	0	0	0	0
RS_GCF_026012015.1	TRUE	p__Bacillota_A	c__Clostridia	o__Clostridiales	f__Clostridiaceae	g__BRXR01	s__BRXR01 sp026012015	d__Bacteria	4656869	32.513	1	0	0	0	0	178	0	0	0	0
RS_GCF_000527135.1	TRUE	p__Pseudomonadota	c__Gammaproteobacteria	o__Burkholderiales	f__Rhodocyclaceae	g__Methyloversatilis	s__Methyloversatilis discipulorum	d__Bacteria	4306529	66.5634	1	0	0	0	0	106	0	0	0	0
GB_GCA_009781515.1	TRUE	p__Bacillota_A	c__Clostridia	o__Oscillospirales	f__Oscillospiraceae	g__WRMH01	s__WRMH01 sp009781515	d__Bacteria	2295717	43.6702	1	0	0	0	0	181	0	0	0	0
GB_GCA_004295055.1	TRUE	p__Pseudomonadota	c__Alphaproteobacteria	o__SHNJ01	f__SHNJ01	g__SHNJ01	s__SHNJ01 sp004295055	d__Bacteria	1948443	48.5147	1	0	0	0	0	203	0	0	0	0
GB_GCA_014728245.1	TRUE	p__VGIX01	c__VGIX01	o__VGIX01	f__VGIX01	g__WJLY01	s__WJLY01 sp014728245	d__Bacteria	2748664	65.8326	1	0	0	0	0	173	0	0	0	0
GB_GCA_028697935.1	TRUE	p__Actinomycetota	c__Humimicrobiia	o__Humimicrobiales	f__Humimicrobiaceae	g__JAQVEM01	s__JAQVEM01 sp028697935	d__Bacteria	1558124	33.9329	1	0	0	0	0	188	0	0	0	0
RS_GCF_016757735.1	TRUE	p__Bacteroidota	c__Bacteroidia	o__Flavobacteriales	f__Flavobacteriaceae	g__Aequorivita	s__Aequorivita iocasae	d__Bacteria	3353883	38.7143	1	2	0	0	0	100	100	0	0	0
GB_GCA_900541665.1	TRUE	p__Actinomycetota	c__Coriobacteriia	o__Coriobacteriales	f__Coriobacteriaceae	g__Collinsella	s__Collinsella sp900541665	d__Bacteria	2269825	59.9607	1	0	0	0	0	194	0	0	0	0
RS_GCF_027922325.1	TRUE	p__Pseudomonadota	c__Alphaproteobacteria	o__Rhizobiales	f__Methylopilaceae	g__Methylopila	s__Methylopila turkensis	d__Bacteria	3868435	69.8955	1	0	0	0	0	191	0	0	0	0
GB_GCA_900299255.1	TRUE	p__Bacteroidota	c__Bacteroidia	o__Chitinophagales	f__Chitinophagaceae	g__Flavipsychrobacter	s__Flavipsychrobacter sp900299255	d__Bacteria	3468983	44.6068	1	0	0	0	0	100	0	0	0	0
RS_GCF_023703415.1	TRUE	p__Actinomycetota	c__Actinomycetes	o__Actinomycetales	f__Microbacteriaceae	g__Microbacterium	s__Microbacterium sp017306305	d__Bacteria	4109641	70.6683	1	0	0	0	0	217	0	0	0	0
RS_GCF_027922165.1	TRUE	p__Pseudomonadota	c__Alphaproteobacteria	o__Caulobacterales	f__Caulobacteraceae	g__Brevundimonas	s__Brevundimonas intermedia	d__Bacteria	3589847	66.622	1	0	0	0	0	212	0	0	0	0
GB_GCA_026708285.1	FALSE	p__Acidobacteriota	c__Thermoanaerobaculia	o__Multivoradales	f__Multivoraceae	g__Multivorans	s__Multivorans sp026708285	d__Bacteria	4987370	67.9622	0	0	0	0	0	0	0	0	0	0
GB_GCA_937872165.1	TRUE	p__Pseudomonadota	c__Gammaproteobacteria	o__Burkholderiales	f__Burkholderiaceae	g__CAHJXF01	s__CAHJXF01 sp937872165	d__Bacteria	4006586	68.3572	1	0	0	0	0	106	0	0	0	0
GB_GCA_945868825.1	TRUE	p__Bacteroidota	c__Bacteroidia	o__Sphingobacteriales	f__Sphingobacteriaceae	g__JAIPAN01	s__JAIPAN01 sp945868825	d__Bacteria	1657114	39.6974	1	0	0	0	0	113	0	0	0	0
GB_GCA_943354745.1	TRUE	p__Patescibacteria	c__Paceibacteria	o__UBA9973	f__UBA10002	g__UBA10002	s__UBA10002 sp943354745	d__Bacteria	921748	46.7424	1	0	0	0	0	145	0	0	0	0
RS_GCF_943192905.1	TRUE	p__Actinomycetota	c__Coriobacteriia	o__Coriobacteriales	f__Eggerthellaceae	g__Adlercreutzia_A	s__Adlercreutzia_A murintestinalis	d__Bacteria	2041910	59.246	1	0	0	0	0	196	0	0	0	0
RS_GCF_003253745.1	TRUE	p__Pseudomonadota	c__Alphaproteobacteria	o__Rhizobiales	f__Rhizobiaceae	g__Mesorhizobium	s__Mesorhizobium kowhaii	d__Bacteria	8062617	62.2963	1	0	0	0	0	185	0	0	0	0
RS_GCF_016612865.1	TRUE	p__Actinomycetota	c__Actinomycetes	o__Mycobacteriales	f__Geodermatophilaceae	g__Blastococcus	s__Blastococcus sp016612865	d__Bacteria	4114186	74.1695	1	0	0	0	0	225	0	0	0	0
RS_GCF_021513155.1	TRUE	p__Bacillota	c__Bacilli	o__Lactobacillales	f__Aerococcaceae	g__Jeotgalibaca	s__Jeotgalibaca sp021513155	d__Bacteria	2489616	35.2898	1	0	0	0	0	184	0	0	0	0
GB_GCA_027483355.1	TRUE	p__Pseudomonadota	c__Alphaproteobacteria	o__Micavibrionales	f__UBA2020	g__JAEXMB01	s__JAEXMB01 sp027483355	d__Bacteria	2868958	55.0809	1	0	0	0	0	197	0	0	0	0
GB_GCA_024278955.1	TRUE	p__Planctomycetota	c__Planctomycetia	o__Pirellulales	f__Lacipirellulaceae	g__Bythopirellula	s__Bythopirellula sp024278955	d__Bacteria	4597595	53.774	1	0	0	0	0	117	0	0	0	0
GB_GCA_023838465.1	TRUE	p__Pseudomonadota	c__Gammaproteobacteria	o__Chromatiales	f__Sedimenticolaceae	g__Thiodiazotropha	s__Thiodiazotropha sp023838465	d__Bacteria	4536162	49.0218	1	0	0	0	0	107	0	0	0	0
GB_GCA_019429045.1	TRUE	p__Bacteroidota	c__Bacteroidia	o__Bacteroidales	f__JAGOPY01	g__JAGOPY01	s__JAGOPY01 sp019429045	d__Bacteria	2888211	48.1104	1	0	0	0	0	100	0	0	0	0
GB_GCA_016720065.1	TRUE	p__Pseudomonadota	c__Gammaproteobacteria	o__Burkholderiales	f__Rhodocyclaceae	g__SSSZ01	s__SSSZ01 sp016720065	d__Bacteria	3789853	65.4663	1	0	0	0	0	107	0	0	0	0
RS_GCF_027924565.1	TRUE	p__Pseudomonadota	c__Gammaproteobacteria	o__Xanthomonadales	f__Xanthomonadaceae	g__Lysobacter	s__Lysobacter auxotrophicus	d__Bacteria	4155451	67.8656	1	0	0	0	0	108	0	0	0	0
GB_GCA_900444965.1	TRUE	p__Pseudomonadota	c__Gammaproteobacteria	o__Enterobacterales	f__Pasteurellaceae	g__Basfia_A	s__Basfia_A rossii	d__Bacteria	2657994	39.1129	0	1	0	0	0	0	105	0	0	0
GB_GCA_030418545.1	TRUE	p__Pseudomonadota	c__Gammaproteobacteria	o__Burkholderiales	f__Burkholderiaceae	g__Xenophilus	s__Xenophilus sp003671765	d__Bacteria	5842092	68.9979	1	0	0	0	0	109	0	0	0	0
RS_GCF_023515995.1	TRUE	p__Actinomycetota	c__Actinomycetes	o__Mycobacteriales	f__Mycobacteriaceae	g__Mycobacterium	s__Mycobacterium methanotrophicum	d__Bacteria	5002371	65.7138	1	0	0	0	0	255	0	0	0	0
RS_GCF_024362205.1	TRUE	p__Bacillota	c__Bacilli	o__Exiguobacterales	f__Exiguobacteraceae	g__Exiguobacterium	s__Exiguobacterium aurantiacum_B	d__Bacteria	3154266	51.8386	1	0	0	0	0	186	0	0	0	0
RS_GCF_018728565.1	TRUE	p__Bacteroidota	c__Bacteroidia	o__Flavobacteriales	f__Flavobacteriaceae	g__Zobellia	s__Zobellia russellii	d__Bacteria	4923091	39.0079	1	1	0	0	0	100	99	0	0	0
GB_GCA_016744775.1	TRUE	p__Pseudomonadota	c__Gammaproteobacteria	o__Beggiatoales	f__Beggiatoaceae	g__Marithrix	s__Marithrix sp016744775	d__Bacteria	3088877	34.0847	1	0	0	0	0	108	0	0	0	0
RS_GCF_900182595.1	TRUE	p__Bacteroidota	c__Bacteroidia	o__Sphingobacteriales	f__Sphingobacteriaceae	g__Pedobacter	s__Pedobacter westerhofensis	d__Bacteria	6345322	43.2147	1	0	0	0	0	115	0	0	0	0
GB_GCA_903874895.1	TRUE	p__Pseudomonadota	c__Alphaproteobacteria	o__Caulobacterales	f__Caulobacteraceae	g__CAIMFV01	s__CAIMFV01 sp903874895	d__Bacteria	3563191	68.0194	1	0	0	0	0	242	0	0	0	0
RS_GCF_000223335.1	TRUE	p__Bacillota	c__Bacilli	o__Lactobacillales	f__Streptococcaceae	g__Streptococcus	s__Streptococcus infantis_M	d__Bacteria	1869505	39.5653	1	0	0	0	0	182	0	0	0	0
GB_GCA_013416405.1	TRUE	p__Pseudomonadota	c__Gammaproteobacteria	o__Burkholderiales	f__Burkholderiaceae	g__Pusillimonas_C	s__Pusillimonas_C sp013416405	d__Bacteria	3661490	56.9264	1	0	0	0	0	109	0	0	0	0
RS_GCF_017897595.1	TRUE	p__Bacteroidota	c__Bacteroidia	o__Flavobacteriales	f__Flavobacteriaceae	g__Aquimarina	s__Aquimarina sp017897595	d__Bacteria	4563508	35.3263	2	2	0	0	0	100	114	0	0	0
RS_GCF_000756385.1	TRUE	p__Pseudomonadota	c__Alphaproteobacteria	o__Sphingomonadales	f__Sphingomonadaceae	g__Sphingopyxis	s__Sphingopyxis sp000756385	d__Bacteria	4210757	65.2111	1	0	0	0	0	190	0	0	0	0
GB_GCA_002772605.1	TRUE	p__Patescibacteria	c__Gracilibacteria	o__Peribacterales	f__Peribacteraceae	g__2-02-FULL-49-16	s__2-02-FULL-49-16 sp002772605	d__Bacteria	828230	49.3003	1	0	0	0	0	102	0	0	0	0
GB_GCA_023653055.1	TRUE	p__Pseudomonadota	c__Gammaproteobacteria	o__Burkholderiales	f__Burkholderiaceae	g__Zwartia	s__Zwartia sp023653055	d__Bacteria	2841925	51.2573	1	0	0	0	0	108	0	0	0	0
RS_GCF_008123425.1	TRUE	p__Pseudomonadota	c__Alphaproteobacteria	o__Rhizobiales	f__Xanthobacteraceae	g__Bradyrhizobium	s__Bradyrhizobium rifense	d__Bacteria	9952932	63.0206	1	0	0	0	0	199	0	0	0	0
RS_GCF_009674685.1	TRUE	p__Bacteroidota	c__Bacteroidia	o__Sphingobacteriales	f__Sphingobacteriaceae	g__Pelobium	s__Pelobium puniceum	d__Bacteria	3899096	34.3927	1	0	0	0	0	112	0	0	0	0
GB_GCA_022703155.1	TRUE	p__Patescibacteria	c__ABY1	o__SG8-24	f__2-12-FULL-60-25	g__MWCR01	s__MWCR01 sp022703155	d__Bacteria	1234304	56.1489	1	0	0	0	0	105	0	0	0	0
GB_GCA_002702705.1	TRUE	p__Chloroflexota	c__Anaerolineae	o__Anaerolineales	f__Anaerolineaceae	g__UBA6170	s__UBA6170 sp002702705	d__Bacteria	5885093	41.3732	1	0	0	0	0	188	0	0	0	0
GB_GCA_029261165.1	TRUE	p__Nitrospirota	c__Nitrospiria	o__SBBL01	f__JAADHI01	g__DUAG01	s__DUAG01 sp029261165	d__Bacteria	2909288	49.3641	1	0	0	0	0	122	0	0	0	0
RS_GCF_003056335.1	TRUE	p__Pseudomonadota	c__Alphaproteobacteria	o__Rhodobacterales	f__Rhodobacteraceae	g__Paracoccus	s__Paracoccus indicus	d__Bacteria	3505879	64.9193	1	0	0	0	0	191	0	0	0	0
RS_GCF_000420725.1	TRUE	p__Bacillota	c__Bacilli	o__Bacillales_H	f__Marinococcaceae	g__Marinococcus	s__Marinococcus halotolerans	d__Bacteria	3139679	48.0425	1	0	0	0	0	198	0	0	0	0
RS_GCF_020297485.1	TRUE	p__Bacillota_A	c__Clostridia	o__Lachnospirales	f__Lachnospiraceae	g__Enterocloster	s__Enterocloster clostridioformis	d__Bacteria	5868697	48.9257	1	0	0	0	0	176	0	0	0	0
RS_GCF_001244995.1	TRUE	p__Bacillota_A	c__Clostridia	o__Oscillospirales	f__Oscillospiraceae	g__Intestinimonas	s__Intestinimonas massiliensis	d__Bacteria	3105129	60.6798	1	0	0	0	0	180	0	0	0	0
RS_GCF_003148845.1	TRUE	p__Bacteroidota	c__Bacteroidia	o__Sphingobacteriales	f__Sphingobacteriaceae	g__Mucilaginibacter	s__Mucilaginibacter oryzae	d__Bacteria	5939202	44.2463	1	0	0	0	0	115	0	0	0	0
RS_GCF_000425365.1	TRUE	p__Pseudomonadota	c__Alphaproteobacteria	o__Acetobacterales	f__Acetobacteraceae	g__Roseococcus	s__Roseococcus flocculans	d__Bacteria	3834117	73.396	1	0	0	0	0	196	0	0	0	0
RS_GCF_010509075.1	TRUE	p__Actinomycetota	c__Coriobacteriia	o__Coriobacteriales	f__Coriobacteriaceae	g__Collinsella	s__Collinsella aerofaciens	d__Bacteria	2455328	60.6003	1	0	0	0	0	194	0	0	0	0
RS_GCF_900699035.1	FALSE	p__Pseudomonadota	c__Gammaproteobacteria	o__Enterobacterales	f__Enterobacteriaceae_A	g__Buchnera	s__Buchnera aphidicola_AV	d__Bacteria	443818	22.0193	0	0	0	0	0	0	0	0	0	0
RS_GCF_016798225.1	TRUE	p__Bacillota_A	c__Clostridia	o__Tissierellales	f__Peptoniphilaceae	g__Anaerococcus	s__Anaerococcus sp900541365	d__Bacteria	1693319	31.9973	1	0	0	0	0	183	0	0	0	0
GB_GCA_022402565.1	TRUE	p__Bacteroidota	c__Bacteroidia	o__Chitinophagales	f__Chitinophagaceae	g__JAFLBI01	s__JAFLBI01 sp022402565	d__Bacteria	2983069	37.0707	2	0	0	0	0	105	0	0	0	0
GB_GCA_030065155.1	TRUE	p__Cyanobacteriota	c__Cyanobacteriia	o__Cyanobacteriales	f__Xenococcaceae	g__JASJDJ01	s__JASJDJ01 sp030065155	d__Bacteria	6237134	37.6527	1	0	0	0	0	202	0	0	0	0
RS_GCF_003363155.1	TRUE	p__Pseudomonadota	c__Gammaproteobacteria	o__Xanthomonadales	f__Rhodanobacteraceae	g__Dyella_B	s__Dyella_B monticola	d__Bacteria	4940170	60.4307	1	0	0	0	0	107	0	0	0	0
GB_GCA_003133325.1	FALSE	p__Actinomycetota	c__Acidimicrobiia	o__Acidimicrobiales	f__RAAP-2	g__Bog-756	s__Bog-756 sp003133325	d__Bacteria	4048569	64.7066	0	0	0	0	0	0	0	0	0	0
GB_GCA_014190235.1	FALSE	p__Actinomycetota	c__Acidimicrobiia	o__Acidimicrobiales	f__Ilumatobacteraceae	g__UBA2093	s__UBA2093 sp014190235	d__Bacteria	2020665	51.299	0	0	0	0	0	0	0	0	0	0
GB_GCA_026394075.1	TRUE	p__Acidobacteriota	c__Terriglobia	o__Bryobacterales	f__Bryobacteraceae	g__JAPKYZ01	s__JAPKYZ01 sp026394075	d__Bacteria	5765239	62.4655	1	0	0	0	0	195	0	0	0	0
GB_GCA_937983335.1	TRUE	p__Verrucomicrobiota	c__Verrucomicrobiae	o__Opitutales	f__Opitutaceae	g__UBA2377	s__UBA2377 sp002344205	d__Bacteria	3572994	65.223	2	0	0	0	0	128	0	0	0	0
RS_GCF_000009765.2	TRUE	p__Actinomycetota	c__Actinomycetes	o__Streptomycetales	f__Streptomycetaceae	g__Streptomyces	s__Streptomyces avermitilis	d__Bacteria	9119895	70.7014	1	0	0	0	0	230	0	0	0	0
RS_GCF_031127905.1	TRUE	p__Verrucomicrobiota	c__Verrucomicrobiae	o__Opitutales	f__Coraliomargaritaceae	g__UBA7441	s__UBA7441 sp031127905	d__Bacteria	4598784	50.2463	1	0	0	0	0	121	0	0	0	0
GB_GCA_002862405.1	TRUE	p__Pseudomonadota	c__Gammaproteobacteria	o__Pseudomonadales	f__Halieaceae	g__Luminiphilus	s__Luminiphilus sp002862405	d__Bacteria	2526148	52.6809	1	0	0	0	0	95	0	0	0	0
GB_GCA_947449695.1	TRUE	p__Bacteroidota	c__Bacteroidia	o__Chitinophagales	f__CAIODY01	g__CAIODY01	s__CAIODY01 sp947449695	d__Bacteria	3139783	34.3504	1	0	0	0	0	99	0	0	0	0
GB_GCA_003176165.1	FALSE	p__Patescibacteria	c__Microgenomatia	o__UBA1400	f__UBA12028	g__PSRQ01	s__PSRQ01 sp003176165	d__Bacteria	1055589	43.4134	0	0	0	0	0	0	0	0	0	0
RS_GCF_001922585.1	TRUE	p__Pseudomonadota	c__Gammaproteobacteria	o__Enterobacterales	f__Enterobacteriaceae	g__1-19	s__1-19 sp001922585	d__Bacteria	3792737	59.8648	1	1	1	0	0	96	111	55	0	0
GB_GCA_022823725.1	FALSE	p__Latescibacterota	c__UBA2968	o__UBA2968	f__UBA2968	g__VXRD01	s__VXRD01 sp022823725	d__Bacteria	5336326	50.985	0	0	0	0	0	0	0	0	0	0
GB_GCA_015657505.1	TRUE	p__Bacteroidota	c__Ignavibacteria	o__SJA-28	f__B-1AR	g__CAIKZJ01	s__CAIKZJ01 sp015657505	d__Bacteria	3237034	43.0797	1	0	0	0	0	104	0	0	0	0
RS_GCF_000730625.1	TRUE	p__Pseudomonadota	c__Gammaproteobacteria	o__Pseudomonadales	f__Pseudomonadaceae	g__Pseudomonas_B	s__Pseudomonas_B oryzihabitans	d__Bacteria	5027590	66.2339	1	0	1	0	0	102	0	71	0	0
RS_GCF_014651175.1	TRUE	p__Actinomycetota	c__Actinomycetes	o__Streptomycetales	f__Streptomycetaceae	g__Streptomyces	s__Streptomyces clavifer	d__Bacteria	7889012	70.6696	1	0	0	0	0	239	0	0	0	0
RS_GCF_900102015.1	TRUE	p__Pseudomonadota	c__Alphaproteobacteria	o__Rhodobacterales	f__Rhodobacteraceae	g__Limimaricola	s__Limimaricola pyoseonensis	d__Bacteria	3911774	70.2592	1	0	0	0	0	191	0	0	0	0
RS_GCF_025150565.1	TRUE	p__Bacillota	c__Bacilli	o__Lactobacillales	f__Aerococcaceae	g__Granulicatella	s__Granulicatella adiacens	d__Bacteria	1965422	37.7811	1	0	0	0	0	180	0	0	0	0
RS_GCF_017599305.1	TRUE	p__Actinomycetota	c__Actinomycetes	o__Mycobacteriales	f__Micromonosporaceae	g__Micromonospora	s__Micromonospora antibiotica	d__Bacteria	7557908	72.5487	1	0	0	0	0	208	0	0	0	0
GB_GCA_903899655.1	TRUE	p__Patescibacteria	c__Saccharimonadia	o__Saccharimonadales	f__UBA1547	g__UBA1547	s__UBA1547 sp903899655	d__Bacteria	924537	40.0673	1	0	0	0	0	123	0	0	0	0
RS_GCF_020641055.1	TRUE	p__Bacillota_A	c__Clostridia	o__Peptostreptococcales	f__Peptostreptococcaceae	g__Clostridioides	s__Clostridioides sp020641055	d__Bacteria	4259110	28.5352	2	0	0	0	0	187	0	0	0	0
RS_GCF_006491595.2	TRUE	p__Bacteroidota	c__Bacteroidia	o__Flavobacteriales	f__Flavobacteriaceae	g__Flavobacterium	s__Flavobacterium jejuense	d__Bacteria	4753655	29.9305	1	0	0	0	0	100	0	0	0	0
RS_GCF_030711405.1	TRUE	p__Pseudomonadota	c__Gammaproteobacteria	o__Burkholderiales	f__Burkholderiaceae	g__Telluria	s__Telluria brevitalea	d__Bacteria	5953864	64.6931	2	0	0	0	0	127	0	0	0	0
RS_GCF_026241105.1	TRUE	p__Actinomycetota	c__Actinomycetes	o__Actinomycetales	f__Micrococcaceae	g__Arthrobacter	s__Arthrobacter sp026241105	d__Bacteria	4813939	63.0951	1	0	0	0	0	241	0	0	0	0
RS_GCF_000768685.1	TRUE	p__Actinomycetota	c__Actinomycetes	o__Actinomycetales	f__Dermatophilaceae	g__Knoellia	s__Knoellia subterranea	d__Bacteria	3566056	69.0418	1	0	0	0	0	230	0	0	0	0
RS_GCF_021403115.1	TRUE	p__Pseudomonadota	c__Alphaproteobacteria	o__Sphingomonadales	f__Sphingomonadaceae	g__Sphingobium	s__Sphingobium sufflavum	d__Bacteria	4430016	64.8978	1	0	0	0	0	195	0	0	0	0
GB_GCA_023818895.1	FALSE	p__Omnitrophota	c__Koll11	o__2-01-FULL-45-10	f__2-01-FULL-45-10	g__JAMWCX01	s__JAMWCX01 sp023818895	d__Bacteria	1560511	47.5127	0	0	0	0	0	0	0	0	0	0
GB_GCA_030652115.1	TRUE	p__Actinomycetota	c__Coriobacteriia	o__Anaerosomatales	f__Anaerosomataceae	g__UBA6100	s__UBA6100 sp030652115	d__Bacteria	2375834	66.3081	1	0	0	0	0	180	0	0	0	0
GB_GCA_958402495.1	TRUE	p__Bacillota_A	c__Clostridia	o__TANB77	f__CAG-508	g__UMGS1663	s__UMGS1663 sp958402495	d__Bacteria	1889427	30.1852	1	0	0	0	0	179	0	0	0	0
RS_GCF_000757825.1	TRUE	p__Pseudomonadota	c__Gammaproteobacteria	o__Enterobacterales	f__Enterobacteriaceae	g__Cedecea	s__Cedecea neteri_A	d__Bacteria	4876443	55.1027	1	1	1	0	0	95	114	55	0	0
RS_GCF_027116575.1	TRUE	p__Pseudomonadota	c__Gammaproteobacteria	o__Burkholderiales	f__Burkholderiaceae	g__Oxalobacter	s__Oxalobacter aliiformigenes	d__Bacteria	2285712	51.0473	1	0	0	0	0	115	0	0	0	0
RS_GCF_028010285.1	TRUE	p__Pseudomonadota	c__Gammaproteobacteria	o__Pseudomonadales	f__Pseudomonadaceae	g__Pseudomonas_F	s__Pseudomonas_F sp028010285	d__Bacteria	5780855	64.7697	1	0	1	0	0	102	0	71	0	0
RS_GCF_001816125.1	TRUE	p__Bacteroidota	c__Bacteroidia	o__Cytophagales	f__Hymenobacteraceae	g__Hymenobacter	s__Hymenobacter coccineus	d__Bacteria	5700921	63.1358	1	0	0	0	0	100	0	0	0	0
RS_GCF_004358445.1	TRUE	p__Pseudomonadota	c__Gammaproteobacteria	o__Enterobacterales	f__Shewanellaceae	g__Parashewanella	s__Parashewanella tropica	d__Bacteria	4222191	40.7825	1	2	1	0	0	99	120	58	0	0
GB_GCA_947626995.1	TRUE	p__Bacillota_A	c__Clostridia	o__Lachnospirales	f__Lachnospiraceae	g__Gallintestinimicrobium	s__Gallintestinimicrobium sp947626995	d__Bacteria	2498453	52.3096	1	0	0	0	0	175	0	0	0	0
GB_GCA_001823065.1	TRUE	p__Patescibacteria	c__Paceibacteria	o__UBA9973	f__XYD1-FULL-46-19	g__XYD1-FULL-44-32	s__XYD1-FULL-44-32 sp001823065	d__Bacteria	705274	43.9555	1	0	0	0	0	122	0	0	0	0
RS_GCF_002897035.1	TRUE	p__Pseudomonadota	c__Alphaproteobacteria	o__Rhizobiales	f__Methylopilaceae	g__Methylopila	s__Methylopila sp002897035	d__Bacteria	4421505	69.1784	1	0	0	0	0	193	0	0	0	0
RS_GCF_000424305.1	TRUE	p__Bacillota_A	c__Clostridia	o__Lachnospirales	f__Lachnospiraceae	g__Pseudobutyrivibrio	s__Pseudobutyrivibrio ruminis_B	d__Bacteria	2912101	38.4759	1	0	0	0	0	177	0	0	0	0
RS_GCF_024626525.1	TRUE	p__Bacillota	c__Bacilli	o__Bacillales_B	f__Bacillaceae_C	g__Lederbergia_A	s__Lederbergia_A panacisoli	d__Bacteria	4110058	37.5847	1	0	0	0	0	184	0	0	0	0
GB_GCA_017962745.1	TRUE	p__Bacillota_I	c__Bacilli_A	o__ML615J-28	f__CAG-698	g__RGIG8164	s__RGIG8164 sp017962745	d__Bacteria	1536171	31.7333	1	0	0	0	0	184	0	0	0	0
GB_GCA_945865695.1	TRUE	p__Bacteroidota	c__Bacteroidia	o__Flavobacteriales	f__UBA2798	g__CAMBFX01	s__CAMBFX01 sp945865695	d__Bacteria	3342284	33.6306	1	0	0	0	0	99	0	0	0	0
RS_GCF_000734965.1	TRUE	p__Pseudomonadota	c__Gammaproteobacteria	o__Enterobacterales	f__Enterobacteriaceae	g__Trabulsiella	s__Trabulsiella guamensis	d__Bacteria	4929751	53.5898	1	1	0	1	0	95	110	0	44	0
RS_GCF_022568815.1	TRUE	p__Pseudomonadota	c__Gammaproteobacteria	o__Burkholderiales	f__Burkholderiaceae	g__Undibacterium	s__Undibacterium sp022568815	d__Bacteria	6506011	52.0257	1	0	0	0	0	115	0	0	0	0
RS_GCF_003591035.1	TRUE	p__Pseudomonadota	c__Gammaproteobacteria	o__Burkholderiales	f__Burkholderiaceae	g__Noviherbaspirillum	s__Noviherbaspirillum saxi	d__Bacteria	6495402	57.5446	3	0	0	0	0	122	0	0	0	0
GB_GCA_025060415.1	TRUE	p__Bipolaricaulota	c__Bipolaricaulia	o__Bipolaricaulales	f__Bipolaricaulaceae	g__DTER01	s__DTER01 sp025060415	d__Bacteria	1352365	69.4518	1	0	0	0	0	170	0	0	0	0
GB_GCA_030018905.1	TRUE	p__CSP1-3	c__CSP1-3	o__CSP1-3	f__CSP1-3	g__VGFA01	s__VGFA01 sp030018905	d__Bacteria	2752885	66.9442	1	0	0	0	0	198	0	0	0	0
RS_GCF_016056305.1	TRUE	p__Cyanobacteriota	c__Cyanobacteriia	o__Cyanobacteriales	f__Nostocaceae	g__Amazonocrinis	s__Amazonocrinis nigriterrae	d__Bacteria	8256472	41.3193	1	0	0	0	0	216	0	0	0	0
RS_GCF_018408575.1	TRUE	p__Bacillota_A	c__Clostridia	o__Oscillospirales	f__Oscillospiraceae	g__Vescimonas	s__Vescimonas coprocola	d__Bacteria	2557760	58.2058	1	0	0	0	0	178	0	0	0	0
GB_GCA_030683995.1	TRUE	p__Bacteroidota	c__Bacteroidia	o__Flavobacteriales	f__Flavobacteriaceae	g__Lutibacter	s__Lutibacter sp030683995	d__Bacteria	3084814	35.5715	1	1	0	0	0	99	100	0	0	0
RS_GCF_000023185.1	TRUE	p__Pseudomonadota	c__Alphaproteobacteria	o__Rhizobiales	f__Rhizobiaceae	g__Rhizobium	s__Rhizobium leguminosarum_J	d__Bacteria	7418122	60.77	1	0	0	0	0	166	0	0	0	0
RS_GCF_008931845.1	FALSE	p__Spirochaetota	c__Spirochaetia	o__Borreliales	f__Borreliaceae	g__Borreliella	s__Borreliella maritima	d__Bacteria	1109596	27.8574	0	0	0	0	0	0	0	0	0	0
GB_GCA_017463985.1	TRUE	p__Bacillota_A	c__Clostridia	o__Oscillospirales	f__Acutalibacteraceae	g__Eubacterium_R	s__Eubacterium_R sp017463985	d__Bacteria	2581250	49.8693	1	0	0	0	0	182	0	0	0	0
GB_GCA_024685545.1	TRUE	p__Bacillota_A	c__Clostridia	o__Eubacteriales	f__Anaerofustaceae	g__JAAYHF01	s__JAAYHF01 sp024685545	d__Bacteria	1730513	49.5197	1	0	0	0	0	173	0	0	0	0
GB_GCA_001771585.1	TRUE	p__Margulisbacteria	c__WOR-1	o__XYC2-FULL-46-14	f__XYC2-FULL-46-14	g__XYC2-FULL-46-14	s__XYC2-FULL-46-14 sp001771585	d__Bacteria	1698899	46.3219	1	0	0	0	0	120	0	0	0	0
RS_GCF_900109825.1	TRUE	p__Bacillota	c__Bacilli	o__Lactobacillales	f__Carnobacteriaceae	g__Alkalibacterium	s__Alkalibacterium putridalgicola	d__Bacteria	2600402	43.1591	1	0	0	0	0	188	0	0	0	0
RS_GCF_900176365.1	TRUE	p__Desulfobacterota	c__Desulfobacteria	o__Desulfobacterales	f__Desulfobacteraceae	g__Desulfocicer	s__Desulfocicer vacuolatum	d__Bacteria	5035799	46.5371	2	0	0	0	0	188	0	0	0	0
RS_GCF_001310635.1	TRUE	p__Bacillota	c__Bacilli	o__Bacillales_H	f__Bacillaceae_D	g__Halalkalibacter	s__Halalkalibacter sp001310635	d__Bacteria	3962169	37.1652	1	0	0	0	0	186	0	0	0	0
GB_GCA_950054195.1	TRUE	p__Bacteroidota	c__Bacteroidia	o__Flavobacteriales	f__CAJJDF01	g__CAJJDF01	s__CAJJDF01 sp950054195	d__Bacteria	3267659	33.4173	1	0	0	0	0	98	0	0	0	0
GB_GCA_958428295.1	TRUE	p__Bacillota_I	c__Bacilli_A	o__RF39	f__UBA660	g__Onthousia	s__Onthousia sp958428295	d__Bacteria	1163449	33.0271	1	0	0	0	0	175	0	0	0	0
GB_GCA_937139475.1	TRUE	p__Pseudomonadota	c__Gammaproteobacteria	o__Enterobacterales	f__Psychrobiaceae	g__Psychrobium	s__Psychrobium sp937139475	d__Bacteria	5355321	42.957	2	0	1	0	0	131	0	59	0	0
GB_GCA_000719695.1	TRUE	p__Actinomycetota	c__Actinomycetes	o__Streptomycetales	f__Streptomycetaceae	g__Kitasatospora	s__Kitasatospora sp000719695	d__Bacteria	9138054	73.7789	2	0	0	0	0	262	0	0	0	0
RS_GCF_000287055.2	TRUE	p__Pseudomonadota	c__Gammaproteobacteria	o__Enterobacterales	f__Vibrionaceae	g__Vibrio	s__Vibrio sp000287055	d__Bacteria	4418179	43.3231	1	2	1	0	0	95	118	57	0	0
RS_GCF_028289855.1	TRUE	p__Pseudomonadota	c__Alphaproteobacteria	o__Sphingomonadales	f__Sphingomonadaceae	g__Sphingomonas	s__Sphingomonas sp028289855	d__Bacteria	3106160	65.6114	1	0	0	0	0	197	0	0	0	0
RS_GCF_024741795.1	TRUE	p__Actinomycetota	c__Actinomycetes	o__Actinomycetales	f__Micrococcaceae	g__Arthrobacter	s__Arthrobacter sp024741795	d__Bacteria	4628024	66.1922	1	0	0	0	0	241	0	0	0	0
RS_GCF_008086175.1	TRUE	p__Bacteroidota	c__Bacteroidia	o__Flavobacteriales	f__Flavobacteriaceae	g__Bizionia	s__Bizionia saleffrena	d__Bacteria	3285275	34.9342	1	1	0	0	0	98	99	0	0	0
GB_GCA_019187195.1	TRUE	p__Acidobacteriota	c__Terriglobia	o__Bryobacterales	f__Bryobacteraceae	g__CADEFT01	s__CADEFT01 sp019187195	d__Bacteria	5828256	62.1825	1	0	0	0	0	190	0	0	0	0
GB_GCA_000317655.1	TRUE	p__Cyanobacteriota	c__Cyanobacteriia	o__Cyanobacteriales	f__Cyanobacteriaceae	g__Cyanobacterium	s__Cyanobacterium stanieri	d__Bacteria	3163381	38.6647	1	0	0	0	0	192	0	0	0	0
GB_GCA_947462685.1	TRUE	p__Pseudomonadota	c__Gammaproteobacteria	o__Burkholderiales	f__Burkholderiaceae	g__Polynucleobacter	s__Polynucleobacter sp947462685	d__Bacteria	2596489	40.1598	1	0	0	0	0	133	0	0	0	0
GB_GCA_938091145.1	TRUE	p__Actinomycetota	c__Aquicultoria	o__SKW223	f__CALKMS01	g__CALKMS01	s__CALKMS01 sp938091145	d__Bacteria	1263707	40.6392	1	0	0	0	0	177	0	0	0	0
GB_GCA_000335715.1	TRUE	p__Pseudomonadota	c__Gammaproteobacteria	o__Burkholderiales	f__Chromobacteriaceae	g__Vogesella	s__Vogesella sp000335715	d__Bacteria	3765366	61.342	1	0	0	0	0	106	0	0	0	0
RS_GCF_947488565.1	TRUE	p__Pseudomonadota	c__Gammaproteobacteria	o__Pseudomonadales	f__Moraxellaceae	g__Psychrobacter	s__Psychrobacter sp947488565	d__Bacteria	3246731	42.4912	1	0	0	0	0	126	0	0	0	0
GB_GCA_003281365.1	TRUE	p__Cyanobacteriota	c__Cyanobacteriia	o__PCC-6307	f__Cyanobiaceae	g__Prochlorococcus_A	s__Prochlorococcus_A sp003281365	d__Bacteria	1567557	31.1804	1	0	0	0	0	194	0	0	0	0
GB_GCA_001788565.1	FALSE	p__Patescibacteria	c__Saccharimonadia	o__Saccharimonadales	f__UBA10212	g__2-01-FULL-49-22	s__2-01-FULL-49-22 sp001788565	d__Bacteria	687546	49.1691	0	0	0	0	0	0	0	0	0	0
GB_GCA_943787425.1	TRUE	p__Pseudomonadota	c__Gammaproteobacteria	o__Pseudomonadales	f__Azotimanducaceae_A	g__UBA9926	s__UBA9926 sp943787425	d__Bacteria	3263788	53.0388	1	0	0	0	0	105	0	0	0	0
GB_GCA_900199505.1	TRUE	p__Actinomycetota	c__Actinomycetes	o__Actinomycetales	f__Actinomycetaceae	g__KH17	s__KH17 sp900199505	d__Bacteria	2724385	64.8906	1	0	0	0	0	211	0	0	0	0
RS_GCF_002934265.1	TRUE	p__Actinomycetota	c__Actinomycetes	o__Mycobacteriales	f__Pseudonocardiaceae	g__Actinokineospora	s__Actinokineospora auranticolor	d__Bacteria	8431890	71.7532	1	0	0	0	0	250	0	0	0	0
RS_GCF_001509485.1	TRUE	p__Actinomycetota	c__Actinomycetes	o__Streptomycetales	f__Streptomycetaceae	g__Streptomyces	s__Streptomyces sp001509485	d__Bacteria	7524057	73.2979	1	0	0	0	0	231	0	0	0	0
RS_GCF_014203155.1	TRUE	p__Pseudomonadota	c__Alphaproteobacteria	o__Rhizobiales	f__Rhizobiaceae	g__Shinella	s__Shinella fusca	d__Bacteria	4851211	65.7268	1	0	0	0	0	191	0	0	0	0
GB_GCA_947632325.1	TRUE	p__Bacillota_I	c__Bacilli_A	o__RF39	f__UBA660	g__CANPXY01	s__CANPXY01 sp947632325	d__Bacteria	1050618	28.7028	1	0	0	0	0	175	0	0	0	0
RS_GCF_947490095.1	TRUE	p__Pseudomonadota	c__Gammaproteobacteria	o__Pseudomonadales	f__Halomonadaceae	g__Halomonas	s__Halomonas sp947490095	d__Bacteria	3382796	64.4546	1	0	1	0	0	102	0	68	0	0
RS_GCF_000146345.1	TRUE	p__Bacillota_A	c__Clostridia	o__Tissierellales	f__Peptoniphilaceae	g__Peptoniphilus_B	s__Peptoniphilus_B duerdenii	d__Bacteria	2124844	34.2365	1	0	0	0	0	174	0	0	0	0
RS_GCF_004564275.1	TRUE	p__Pseudomonadota	c__Alphaproteobacteria	o__Sphingomonadales	f__Sphingomonadaceae	g__Allosphingosinicella	s__Allosphingosinicella parva	d__Bacteria	4487171	68.3972	1	0	0	0	0	192	0	0	0	0
GB_GCA_023389745.1	FALSE	p__Actinomycetota	c__Acidimicrobiia	o__Acidimicrobiales	f__Microtrichaceae	g__JAFAFN01	s__JAFAFN01 sp023389745	d__Bacteria	4811671	70.6226	0	0	0	0	0	0	0	0	0	0
RS_GCF_000316665.1	TRUE	p__Cyanobacteriota	c__Cyanobacteriia	o__Cyanobacteriales	f__Nostocaceae	g__Rivularia	s__Rivularia sp000316665	d__Bacteria	8728773	37.5316	1	0	0	0	0	221	0	0	0	0
RS_GCF_029960785.1	TRUE	p__Myxococcota	c__Polyangia	o__Polyangiales	f__Polyangiaceae	g__Polyangium	s__Polyangium sp029960785	d__Bacteria	13387150	68.7197	1	0	0	0	0	119	0	0	0	0
GB_GCA_027067235.1	TRUE	p__Pseudomonadota	c__Gammaproteobacteria	o__QOAV01	f__QOAV01	g__QOAV01	s__QOAV01 sp027067235	d__Bacteria	2394346	58.445	1	0	0	0	0	114	0	0	0	0
RS_GCF_001641635.1	TRUE	p__Pseudomonadota	c__Alphaproteobacteria	o__Rhizobiales	f__Xanthobacteraceae	g__Bradyrhizobium	s__Bradyrhizobium centrolobii	d__Bacteria	10111113	63.2195	1	0	0	0	0	199	0	0	0	0
GB_GCA_009377835.1	TRUE	p__Actinomycetota	c__Nitriliruptoria	o__Euzebyales	f__Egibacteraceae	g__WHTG01	s__WHTG01 sp009377835	d__Bacteria	3342050	68.7427	1	0	0	0	0	194	0	0	0	0
GB_GCA_029938115.1	TRUE	p__Pseudomonadota	c__Gammaproteobacteria	o__Enterobacterales	f__Alteromonadaceae	g__Colwellia	s__Colwellia sp029938115	d__Bacteria	5201598	37.456	2	1	2	0	0	112	118	58	0	0
RS_GCF_029637705.1	TRUE	p__Actinomycetota	c__Actinomycetes	o__Actinomycetales	f__Micrococcaceae	g__CmP2	s__CmP2 sp029637705	d__Bacteria	3129675	64.2218	1	0	0	0	0	226	0	0	0	0
GB_GCA_951812825.1	FALSE	p__Chloroflexota	c__Dehalococcoidia	o__UBA3495	f__GCA-2712585	g__JAPULR01	s__JAPULR01 sp951812825	d__Bacteria	2472204	59.9473	0	0	0	0	0	0	0	0	0	0
RS_GCF_014193675.1	TRUE	p__Desulfobacterota	c__Desulfuromonadia	o__Geobacterales	f__Geobacteraceae	g__Geomonas	s__Geomonas limicola	d__Bacteria	5233656	61.8202	1	0	0	0	0	182	0	0	0	0
RS_GCF_900176605.1	TRUE	p__Bacillota_A	c__Clostridia	o__Tissierellales	f__Peptoniphilaceae	g__Peptoniphilus_A	s__Peptoniphilus_A vaginalis	d__Bacteria	1877211	34.2281	1	0	0	0	0	175	0	0	0	0
GB_GCA_947487895.1	TRUE	p__Bacteroidota	c__Bacteroidia	o__Flavobacteriales	f__Flavobacteriaceae	g__Seonamhaeicola	s__Seonamhaeicola sp947487895	d__Bacteria	4386169	31.6664	1	1	0	0	0	100	99	0	0	0
RS_GCF_000746275.1	TRUE	p__Pseudomonadota	c__Alphaproteobacteria	o__Rhizobiales	f__Aestuariivirgaceae	g__Thermopetrobacter	s__Thermopetrobacter sp000746275	d__Bacteria	2608923	62.0226	1	0	0	0	0	207	0	0	0	0
RS_GCF_001078375.1	TRUE	p__Bacillota_C	c__Negativicutes	o__Veillonellales	f__Veillonellaceae	g__Veillonella	s__Veillonella tobetsuensis	d__Bacteria	2161277	38.4731	1	0	0	0	0	177	0	0	0	0
RS_GCF_900143005.1	TRUE	p__Actinomycetota	c__Actinomycetes	o__Mycobacteriales	f__Cryptosporangiaceae	g__Cryptosporangium	s__Cryptosporangium aurantiacum	d__Bacteria	9579923	71.1968	1	0	0	0	0	211	0	0	0	0
RS_GCF_013149805.1	TRUE	p__Actinomycetota	c__Actinomycetes	o__Actinomycetales	f__Cellulomonadaceae	g__Isoptericola	s__Isoptericola chiayiensis	d__Bacteria	3616226	73.02	1	0	0	0	0	218	0	0	0	0
RS_GCF_000615285.1	TRUE	p__Bacillota	c__Bacilli	o__Lactobacillales	f__Lactobacillaceae	g__Lactobacillus	s__Lactobacillus kitasatonis	d__Bacteria	1902496	37.4991	1	0	0	0	0	181	0	0	0	0
GB_GCA_904419735.1	TRUE	p__Bacillota_A	c__Clostridia	o__Christensenellales	f__QALW01	g__Neochristensenella	s__Neochristensenella gallicola	d__Bacteria	2583556	47.0472	1	0	0	0	0	175	0	0	0	0
GB_GCA_947627725.1	TRUE	p__Bacillota_A	c__Clostridia	o__Oscillospirales	f__Acutalibacteraceae	g__Eubacterium_R	s__Eubacterium_R sp947627725	d__Bacteria	2461794	39.3516	1	0	0	0	0	182	0	0	0	0
GB_GCA_945901265.1	TRUE	p__Pseudomonadota	c__Alphaproteobacteria	o__Rickettsiales	f__UBA1997	g__CAILUF01	s__CAILUF01 sp945901265	d__Bacteria	1419934	30.819	1	0	0	0	0	209	0	0	0	0
GB_GCA_937899995.1	TRUE	p__Pseudomonadota	c__Gammaproteobacteria	o__PS1	f__Thioglobaceae	g__Thioglobus_C	s__Thioglobus_C sp937899995	d__Bacteria	1243108	38.7699	1	0	0	0	0	98	0	0	0	0
RS_GCF_000986795.1	TRUE	p__Bacillota	c__Bacilli	o__Staphylococcales	f__Salinicoccaceae	g__Salinicoccus	s__Salinicoccus sediminis	d__Bacteria	2591284	48.7051	1	0	0	0	0	193	0	0	0	0
RS_GCF_020687805.1	TRUE	p__Pseudomonadota	c__Gammaproteobacteria	o__Enterobacterales	f__Alteromonadaceae	g__Planctobacterium	s__Planctobacterium marinum	d__Bacteria	5239599	46.2355	1	0	1	0	0	95	0	57	0	0
RS_GCF_019492055.1	TRUE	p__Pseudomonadota	c__Alphaproteobacteria	o__Rhizobiales	f__Rhizobiaceae	g__Flavimaribacter	s__Flavimaribacter sediminis	d__Bacteria	5691365	59.5344	1	0	0	0	0	189	0	0	0	0
RS_GCF_003351145.1	TRUE	p__Deinococcota	c__Deinococci	o__Deinococcales	f__Thermaceae	g__Meiothermus	s__Meiothermus sp003351145	d__Bacteria	2407594	66.8346	1	0	0	0	0	180	0	0	0	0
GB_GCA_020629635.1	TRUE	p__Actinomycetota	c__Acidimicrobiia	o__Acidimicrobiales	f__SHLQ01	g__SHLQ01	s__SHLQ01 sp020629635	d__Bacteria	4453199	65.6189	1	0	0	0	0	185	0	0	0	0
RS_GCF_018129985.1	TRUE	p__Pseudomonadota	c__Alphaproteobacteria	o__Rhizobiales	f__Xanthobacteraceae	g__Bradyrhizobium	s__Bradyrhizobium japonicum_H	d__Bacteria	7171628	64.1125	1	0	0	0	0	204	0	0	0	0
RS_GCF_001418085.1	TRUE	p__Bacteroidota	c__Bacteroidia	o__Flavobacteriales	f__Flavobacteriaceae	g__Lacinutrix	s__Lacinutrix algicola	d__Bacteria	3661347	31.365	1	1	0	0	0	96	100	0	0	0
RS_GCF_018917865.1	TRUE	p__Bacillota_A	c__Clostridia	o__Tissierellales	f__Tissierellaceae	g__Tissierella_C	s__Tissierella_C simiarum	d__Bacteria	4087897	30.3827	1	0	0	0	0	177	0	0	0	0
GB_GCA_015057505.1	TRUE	p__Bacillota_A	c__Clostridia	o__Lachnospirales	f__Lachnospiraceae	g__SIG300	s__SIG300 sp015057505	d__Bacteria	2855766	40.053	1	0	0	0	0	178	0	0	0	0
GB_GCA_026645875.1	TRUE	p__Chloroflexota	c__Anaerolineae	o__Anaerolineales	f__Anaerolineaceae	g__Longilinea	s__Longilinea sp026645875	d__Bacteria	3073917	58.7492	1	0	0	0	0	186	0	0	0	0
GB_GCA_024451685.1	TRUE	p__Planctomycetota	c__Brocadiia	o__Brocadiales	f__Bathyanammoxibiaceae	g__Bathyanammoxibius	s__Bathyanammoxibius amoris	d__Bacteria	2070208	52.3664	1	0	0	0	0	112	0	0	0	0
GB_GCA_019459525.1	TRUE	p__Bacteroidota	c__Bacteroidia	o__Bacteroidales	f__Prolixibacteraceae	g__UBA6024	s__UBA6024 sp019459525	d__Bacteria	5541905	41.819	1	0	0	0	0	100	0	0	0	0
GB_GCA_022842995.1	TRUE	p__Patescibacteria	c__Saccharimonadia	o__Saccharimonadales	f__2-12-FULL-41-12	g__JALHOM01	s__JALHOM01 sp022842995	d__Bacteria	1111147	45.6285	1	0	0	0	0	125	0	0	0	0
GB_GCA_028713575.1	FALSE	p__Patescibacteria	c__ABY1	o__UBA2591	f__UBA6264	g__JAQTOB01	s__JAQTOB01 sp028713575	d__Bacteria	692187	34.6321	0	0	0	0	0	0	0	0	0	0
GB_GCA_014075255.1	TRUE	p__Pseudomonadota	c__Gammaproteobacteria	o__UBA4575	f__UBA4575	g__JABDMD01	s__JABDMD01 sp014075255	d__Bacteria	2650119	39.5523	1	0	0	0	0	108	0	0	0	0
RS_GCF_004210215.2	TRUE	p__Actinomycetota	c__Actinomycetes	o__Actinomycetales	f__Microbacteriaceae	g__Cryobacterium	s__Cryobacterium sp004210215	d__Bacteria	4068634	67.5117	1	0	0	0	0	234	0	0	0	0
RS_GCF_000022565.1	TRUE	p__Acidobacteriota	c__Terriglobia	o__Terriglobales	f__Acidobacteriaceae	g__Acidobacterium	s__Acidobacterium capsulatum	d__Bacteria	4127356	60.497	1	0	0	0	0	225	0	0	0	0
GB_GCA_016868575.1	TRUE	p__Bacteroidota	c__Bacteroidia	o__Bacteroidales	f__FEN-979	g__VGGL01	s__VGGL01 sp016868575	d__Bacteria	2839959	46.6309	1	0	0	0	0	99	0	0	0	0
GB_GCA_002698985.1	TRUE	p__Bacteroidota	c__Bacteroidia	o__Chitinophagales	f__Saprospiraceae	g__UBA6168	s__UBA6168 sp002698985	d__Bacteria	4832204	51.8499	1	0	0	0	0	104	0	0	0	0
RS_GCF_026410385.1	TRUE	p__Bacillota	c__Bacilli	o__Tumebacillales	f__Tumebacillaceae	g__DT12	s__DT12 sp026410385	d__Bacteria	4184153	57.5992	1	0	0	0	0	185	0	0	0	0
GB_GCA_028284865.1	FALSE	p__Bacteroidota	c__Rhodothermia	o__Rhodothermales	f__UBA10348	g__JAAZVD01	s__JAAZVD01 sp028284865	d__Bacteria	3481060	57.3674	0	0	0	0	0	0	0	0	0	0
RS_GCF_000615805.1	TRUE	p__Bacillota	c__Bacilli	o__Lactobacillales	f__Lactobacillaceae	g__Latilactobacillus	s__Latilactobacillus fuchuensis	d__Bacteria	2107444	41.7944	1	0	0	0	0	181	0	0	0	0
RS_GCF_001570565.1	TRUE	p__Actinomycetota	c__Actinomycetes	o__Streptosporangiales	f__Streptosporangiaceae	g__Herbidospora	s__Herbidospora yilanensis	d__Bacteria	7857004	70.784	1	0	0	0	0	223	0	0	0	0
RS_GCF_003493605.1	TRUE	p__Pseudomonadota	c__Gammaproteobacteria	o__Enterobacterales	f__Pasteurellaceae	g__Haemophilus	s__Haemophilus haemolyticus_J	d__Bacteria	1795109	38.4416	0	1	0	0	0	0	107	0	0	0
RS_GCF_900114705.1	TRUE	p__Pseudomonadota	c__Gammaproteobacteria	o__Burkholderiales	f__Burkholderiaceae	g__Rugamonas	s__Rugamonas rubra	d__Bacteria	6830503	66.9918	1	0	0	0	0	118	0	0	0	0
RS_GCF_001073155.1	TRUE	p__Bacillota	c__Bacilli	o__Lactobacillales	f__Streptococcaceae	g__Streptococcus	s__Streptococcus parasanguinis_D	d__Bacteria	2121511	41.6973	1	0	0	0	0	180	0	0	0	0
GB_GCA_927441705.1	TRUE	p__Bacillota_I	c__Bacilli_A	o__Acholeplasmatales	f__Acholeplasmataceae	g__Mariniplasma	s__Mariniplasma sp927441705	d__Bacteria	1759517	30.9246	1	0	0	0	0	183	0	0	0	0
GB_GCA_030615505.1	TRUE	p__Spirochaetota	c__Spirochaetia	o__SZUA-6	f__DRHE01	g__JAUWZD01	s__JAUWZD01 sp030615505	d__Bacteria	4436925	44.2776	1	0	0	0	0	112	0	0	0	0
GB_GCA_938036155.1	TRUE	p__Patescibacteria	c__Saccharimonadia	o__Saccharimonadales	f__Nanogingivalaceae	g__Nanogingivalis	s__Nanogingivalis sp938036155	d__Bacteria	665678	35.567	1	0	0	0	0	122	0	0	0	0
RS_GCF_001682855.1	TRUE	p__Bacillota	c__Bacilli	o__Paenibacillales	f__Paenibacillaceae	g__Paenibacillus	s__Paenibacillus sp001682855	d__Bacteria	6681755	47.7227	1	0	0	0	0	183	0	0	0	0
RS_GCF_000236165.1	TRUE	p__Pseudomonadota	c__Gammaproteobacteria	o__Legionellales	f__Legionellaceae	g__Legionella	s__Legionella dumoffii	d__Bacteria	3909670	39.6377	1	0	0	0	0	95	0	0	0	0
RS_GCF_010820565.1	TRUE	p__Pseudomonadota	c__Gammaproteobacteria	o__Chromatiales	f__Chromatiaceae	g__Thiorhodococcus	s__Thiorhodococcus minor	d__Bacteria	6204626	64.8059	1	0	0	0	0	106	0	0	0	0
RS_GCF_002259745.1	TRUE	p__Actinomycetota	c__Actinomycetes	o__Actinomycetales	f__Bifidobacteriaceae	g__Bifidobacterium	s__Bifidobacterium myosotis	d__Bacteria	2944195	62.5515	1	0	0	0	0	220	0	0	0	0
RS_GCF_013285155.1	TRUE	p__Bacteroidota	c__Bacteroidia	o__Flavobacteriales	f__Flavobacteriaceae	g__Winogradskyella	s__Winogradskyella undariae	d__Bacteria	4198086	31.7918	1	1	0	0	0	100	99	0	0	0
RS_GCF_003437035.1	TRUE	p__Actinomycetota	c__Coriobacteriia	o__Coriobacteriales	f__Coriobacteriaceae	g__Collinsella	s__Collinsella sp003437035	d__Bacteria	2305804	59.5391	1	0	0	0	0	194	0	0	0	0
GB_GCA_028717505.1	FALSE	p__Patescibacteria	c__Gracilibacteria	o__Peribacterales	f__Peribacteraceae	g__JAQUNQ01	s__JAQUNQ01 sp028717505	d__Bacteria	1067347	60.2289	0	0	0	0	0	0	0	0	0	0
GB_GCA_009991965.1	TRUE	p__Patescibacteria	c__Microgenomatia	o__UBA1400	f__PJMF01	g__UM-FILTER-42-14	s__UM-FILTER-42-14 sp009991965	d__Bacteria	853881	44.1576	0	1	0	0	0	0	103	0	0	0
GB_GCA_027593365.1	TRUE	p__Verrucomicrobiota	c__Verrucomicrobiae	o__Opitutales	f__MB11C04	g__MB11C04	s__MB11C04 sp027593365	d__Bacteria	1877404	46.1532	1	0	0	0	0	116	0	0	0	0
GB_GCA_019683875.1	TRUE	p__Bacillota_E	c__RBS10-35	o__RBS10-35	f__Bu92	g__Bu92	s__Bu92 sp019683875	d__Bacteria	1869801	70.7222	1	0	0	0	0	181	0	0	0	0
RS_GCF_023734115.1	TRUE	p__Actinomycetota	c__Actinomycetes	o__Actinomycetales	f__Microbacteriaceae	g__Naasia	s__Naasia sp023734115	d__Bacteria	3179366	69.4746	1	0	0	0	0	238	0	0	0	0
RS_GCF_002804205.1	FALSE	p__Bacillota_I	c__Bacilli_A	o__Mycoplasmatales	f__Mycoplasmataceae	g__Williamsoniiplasma	s__Williamsoniiplasma freundtii	d__Bacteria	838114	34.5977	0	0	0	0	0	0	0	0	0	0
RS_GCF_014054985.1	TRUE	p__Pseudomonadota	c__Gammaproteobacteria	o__Burkholderiales	f__Neisseriaceae	g__Kingella_B	s__Kingella_B oralis	d__Bacteria	2420532	54.3027	1	0	0	0	0	97	0	0	0	0
GB_GCA_014983025.1	TRUE	p__Pseudomonadota	c__Alphaproteobacteria	o__Sphingomonadales	f__Sphingomonadaceae	g__Erythrobacter	s__Erythrobacter sp014983025	d__Bacteria	2518489	57.4186	1	0	0	0	0	192	0	0	0	0
RS_GCF_030815585.1	TRUE	p__Actinomycetota	c__Actinomycetes	o__Actinomycetales	f__Micrococcaceae	g__Arthrobacter	s__Arthrobacter pascens_A	d__Bacteria	4729875	64.2453	1	0	0	0	0	241	0	0	0	0
RS_GCF_004685055.1	TRUE	p__Pseudomonadota	c__Gammaproteobacteria	o__Enterobacterales	f__Vibrionaceae	g__Aliivibrio	s__Aliivibrio fischeri_B	d__Bacteria	4283732	38.3118	1	1	1	0	0	95	117	57	0	0
RS_GCF_004210275.1	TRUE	p__Pseudomonadota	c__Alphaproteobacteria	o__Rickettsiales	f__Midichloriaceae	g__RICK02	s__RICK02 sp004210275	d__Bacteria	1375759	40.8379	1	0	0	0	0	200	0	0	0	0
RS_GCF_001679665.1	TRUE	p__Pseudomonadota	c__Alphaproteobacteria	o__Caulobacterales	f__TH1-2	g__Vitreimonas	s__Vitreimonas manganica	d__Bacteria	3732719	61.5006	1	0	0	0	0	204	0	0	0	0
RS_GCF_902460665.1	TRUE	p__Campylobacterota	c__Campylobacteria	o__Campylobacterales	f__Campylobacteraceae	g__Campylobacter_A	s__Campylobacter_A concisus_AL	d__Bacteria	1885136	37.5941	1	0	0	0	0	175	0	0	0	0
GB_GCA_026702745.1	TRUE	p__JAAXHH01	c__JAAXHH01	o__JAAXHH01	f__JAAXHH01	g__JAAXHH01	s__JAAXHH01 sp026702745	d__Bacteria	3884263	62.0345	1	0	0	0	0	100	0	0	0	0
RS_GCF_001945605.1	TRUE	p__Bacillota_I	c__Bacilli_A	o__Erysipelotrichales	f__Erysipelotrichaceae	g__Dubosiella	s__Dubosiella newyorkensis	d__Bacteria	2254642	42.3731	1	0	0	0	0	177	0	0	0	0
RS_GCF_003944215.1	TRUE	p__Bacillota	c__Bacilli	o__Lactobacillales	f__Streptococcaceae	g__Streptococcus	s__Streptococcus oralis_BI	d__Bacteria	1941958	41.1159	1	0	0	0	0	182	0	0	0	0
RS_GCF_015477805.1	TRUE	p__Actinomycetota	c__Actinomycetes	o__Mycobacteriales	f__Mycobacteriaceae	g__Nocardia	s__Nocardia flavorosea_A	d__Bacteria	6390854	67.5519	1	0	0	0	0	239	0	0	0	0
GB_GCA_026993805.1	TRUE	p__Thermotogota	c__Thermotogae	o__Thermotogales	f__Thermotogaceae	g__JALWSA01	s__JALWSA01 sp026993805	d__Bacteria	1689176	45.3363	1	0	0	0	0	182	0	0	0	0
RS_GCF_001425045.1	TRUE	p__Pseudomonadota	c__Gammaproteobacteria	o__Burkholderiales	f__Burkholderiaceae	g__Pseudoduganella	s__Pseudoduganella sp001425045	d__Bacteria	7207331	65.816	1	0	0	0	0	118	0	0	0	0
GB_GCA_000752215.1	TRUE	p__Bacillota_A	c__Clostridia	o__Oscillospirales	f__Acutalibacteraceae	g__Caproiciproducens	s__Caproiciproducens sp000752215	d__Bacteria	3737722	51.3351	1	0	0	0	0	178	0	0	0	0
GB_GCA_030665965.1	FALSE	p__Patescibacteria	c__Paceibacteria	o__Paceibacterales	f__JANBVM01	g__DAOUYT01	s__DAOUYT01 sp030665965	d__Bacteria	469738	35.6411	0	0	0	0	0	0	0	0	0	0
RS_GCF_001941485.1	TRUE	p__Actinomycetota	c__Actinomycetes	o__Mycobacteriales	f__Mycobacteriaceae	g__Corynebacterium	s__Corynebacterium frankenforstense	d__Bacteria	2604152	71.5066	1	0	0	0	0	225	0	0	0	0
RS_GCF_012516435.1	TRUE	p__Desulfobacterota	c__Desulfovibrionia	o__Desulfovibrionales	f__Desulfovibrionaceae	g__Pseudodesulfovibrio	s__Pseudodesulfovibrio sp012516435	d__Bacteria	4082342	53.2602	1	0	0	0	0	179	0	0	0	0
GB_GCA_947502145.1	TRUE	p__Pseudomonadota	c__Alphaproteobacteria	o__Rhodobacterales	f__Rhodobacteraceae	g__CANMYO01	s__CANMYO01 sp947502145	d__Bacteria	4027451	58.0439	1	0	0	0	0	191	0	0	0	0
GB_GCA_029573715.1	FALSE	p__Patescibacteria	c__Microgenomatia	o__UBA1406	f__GWC2-37-13	g__JAGOLU01	s__JAGOLU01 sp029573715	d__Bacteria	1793708	44.4042	0	0	0	0	0	0	0	0	0	0
RS_GCF_022230935.1	TRUE	p__Actinomycetota	c__Actinomycetes	o__Mycobacteriales	f__Micromonosporaceae	g__Micromonospora	s__Micromonospora hortensis	d__Bacteria	6947278	71.0814	1	0	0	0	0	211	0	0	0	0
GB_GCA_017460805.1	FALSE	p__Bacillota_A	c__Clostridia	o__Lachnospirales	f__CAG-274	g__RGIG4310	s__RGIG4310 sp017460805	d__Bacteria	2990434	43.1477	0	0	0	0	0	0	0	0	0	0
RS_GCF_002934625.1	TRUE	p__Actinomycetota	c__Actinomycetes	o__Actinomycetales	f__Kineococcaceae	g__Kineococcus	s__Kineococcus xinjiangensis	d__Bacteria	4617682	74.6458	1	0	0	0	0	245	0	0	0	0
RS_GCF_006539545.1	TRUE	p__Pseudomonadota	c__Alphaproteobacteria	o__Rhizobiales	f__Xanthobacteraceae	g__Nitrobacter	s__Nitrobacter winogradskyi_A	d__Bacteria	3960943	61.3049	1	0	0	0	0	198	0	0	0	0
RS_GCF_004000845.1	TRUE	p__Bacillota	c__Bacilli	o__Paenibacillales	f__NBRC-103111	g__Paenibacillus_AA	s__Paenibacillus_AA koleovorans	d__Bacteria	7544267	54.8786	1	0	0	0	0	188	0	0	0	0
RS_GCF_014196525.1	TRUE	p__Pseudomonadota	c__Alphaproteobacteria	o__Sphingomonadales	f__Sphingomonadaceae	g__Novosphingobium	s__Novosphingobium sediminicola	d__Bacteria	5372701	62.9473	1	0	0	0	0	188	0	0	0	0
GB_GCA_002239105.1	FALSE	p__Actinomycetota	c__Acidimicrobiia	o__Acidimicrobiales	f__Bin134	g__Poriferisocius	s__Poriferisocius sp002239105	d__Bacteria	3684518	64.2888	0	0	0	0	0	0	0	0	0	0
GB_GCA_902609685.1	FALSE	p__Pseudomonadota	c__Alphaproteobacteria	o__Pelagibacterales	f__Pelagibacteraceae	g__Pelagibacter	s__Pelagibacter sp902609685	d__Bacteria	1189543	29.4748	0	0	0	0	0	0	0	0	0	0
RS_GCF_000708265.2	TRUE	p__Bacteroidota	c__Bacteroidia	o__Sphingobacteriales	f__Sphingobacteriaceae	g__Pedobacter	s__Pedobacter sp000708265	d__Bacteria	5006523	37.1318	1	0	0	0	0	115	0	0	0	0
RS_GCF_012927245.1	TRUE	p__Actinomycetota	c__Actinomycetes	o__Streptomycetales	f__Streptomycetaceae	g__Streptomyces	s__Streptomyces sp012927245	d__Bacteria	7950470	72.7412	2	0	0	0	0	263	0	0	0	0
RS_GCF_000706625.1	FALSE	p__Pseudomonadota	c__Alphaproteobacteria	o__Rhizobiales	f__Rhizobiaceae	g__Bartonella	s__Bartonella koehlerae	d__Bacteria	1747106	37.5768	0	0	0	0	0	0	0	0	0	0
GB_GCA_002695905.1	TRUE	p__Pseudomonadota	c__Alphaproteobacteria	o__Parvibaculales	f__Parvibaculaceae	g__Mf105b01	s__Mf105b01 sp002695905	d__Bacteria	4818388	50.6291	1	0	0	0	0	193	0	0	0	0
RS_GCF_000770585.1	TRUE	p__Pseudomonadota	c__Gammaproteobacteria	o__Legionellales	f__Legionellaceae	g__Legionella	s__Legionella norrlandica	d__Bacteria	3070855	37.4684	1	0	0	0	0	99	0	0	0	0
RS_GCF_003332885.2	TRUE	p__Bacteroidota	c__Bacteroidia	o__Chitinophagales	f__Chitinophagaceae	g__Paracnuella	s__Paracnuella aquatica	d__Bacteria	4976980	49.3222	2	0	0	0	0	105	0	0	0	0
RS_GCF_025567005.1	TRUE	p__Bacillota_A	c__Clostridia	o__Lachnospirales	f__Lachnospiraceae	g__Muricoprocola	s__Muricoprocola aceti	d__Bacteria	3270962	43.0671	1	0	0	0	0	176	0	0	0	0
GB_GCA_012965045.1	TRUE	p__Patescibacteria	c__Saccharimonadia	o__Saccharimonadales	f__DTSZ01	g__DTSZ01	s__DTSZ01 sp012965045	d__Bacteria	909550	43.2737	1	0	0	0	0	128	0	0	0	0
RS_GCF_001456955.1	TRUE	p__Actinomycetota	c__Actinomycetes	o__Actinomycetales	f__Microbacteriaceae	g__Microbacterium	s__Microbacterium enclense	d__Bacteria	3666504	70.338	1	0	0	0	0	221	0	0	0	0
RS_GCF_003367505.1	TRUE	p__Bacillota	c__Bacilli	o__Bacillales_A	f__Planococcaceae	g__Lysinibacillus	s__Lysinibacillus capsici	d__Bacteria	4574203	37.5365	1	0	0	0	0	183	0	0	0	0
RS_GCF_030866745.1	TRUE	p__Pseudomonadota	c__Alphaproteobacteria	o__Sphingomonadales	f__Sphingomonadaceae	g__Sphingomicrobium	s__Sphingomicrobium limnosediminicola	d__Bacteria	2656862	63.5479	1	0	0	0	0	187	0	0	0	0
GB_GCA_031268035.1	FALSE	p__Pseudomonadota	c__Alphaproteobacteria	o__Rickettsiales	f__UBA1997	g__CALXRO01	s__CALXRO01 sp031268035	d__Bacteria	922595	40.4049	0	0	0	0	0	0	0	0	0	0
RS_GCF_013466985.1	TRUE	p__Actinomycetota	c__Actinomycetes	o__Propionibacteriales	f__Nocardioidaceae	g__Nocardioides	s__Nocardioides ungokensis	d__Bacteria	4624782	71.6931	2	0	0	0	0	258	0	0	0	0
RS_GCF_000445185.1	TRUE	p__Bacillota_A	c__Thermoanaerobacteria	o__Thermoanaerobacterales	f__Thermoanaerobacteraceae	g__Thermoanaerobacter	s__Thermoanaerobacter sp000445185	d__Bacteria	2614610	34.0083	1	0	0	0	0	181	0	0	0	0
RS_GCF_023509475.1	TRUE	p__Pseudomonadota	c__Gammaproteobacteria	o__Pseudomonadales	f__Aestuariirhabdaceae	g__Aestuariirhabdus	s__Aestuariirhabdus haliotis	d__Bacteria	4157691	51.8623	1	0	1	0	0	95	0	68	0	0
GB_GCA_002691205.1	FALSE	p__Myxococcota_A	c__UBA9160	o__UBA9160	f__UBA4427	g__MED660	s__MED660 sp002691205	d__Bacteria	4558888	54.1883	0	0	0	0	0	0	0	0	0	0
RS_GCF_962747995.1	TRUE	p__Pseudomonadota	c__Gammaproteobacteria	o__Burkholderiales	f__Neisseriaceae	g__Neisseria	s__Neisseria viridiae	d__Bacteria	2019266	52.2216	1	0	0	0	0	97	0	0	0	0
GB_GCA_026710655.1	FALSE	p__Chloroflexota	c__Dehalococcoidia	o__Tepidiformales	f__Tepidiformaceae	g__UBA2991	s__UBA2991 sp026710655	d__Bacteria	3139899	68.4026	0	0	0	0	0	0	0	0	0	0
GB_GCA_902800355.1	TRUE	p__Bacillota_I	c__Bacilli_A	o__RFN20	f__CAG-826	g__UBA2450	s__UBA2450 sp902800355	d__Bacteria	1138734	33.8592	1	0	0	0	0	183	0	0	0	0
RS_GCF_007845675.1	TRUE	p__Actinomycetota	c__Actinomycetes	o__Mycobacteriales	f__Pseudonocardiaceae	g__Lentzea	s__Lentzea tibetensis	d__Bacteria	9370857	69.5015	1	0	0	0	0	228	0	0	0	0
GB_GCA_016788945.1	TRUE	p__Spirochaetota	c__Leptospirae	o__Turneriellales	f__Turneriellaceae	g__Turneriella	s__Turneriella sp016788945	d__Bacteria	3704107	52.7495	1	0	0	0	0	271	0	0	0	0
RS_GCF_029767005.1	TRUE	p__Pseudomonadota	c__Gammaproteobacteria	o__Thiomicrospirales	f__Thiomicrospiraceae	g__Thiomicrorhabdus	s__Thiomicrorhabdus sp029767005	d__Bacteria	2466195	47.2963	1	0	0	0	0	106	0	0	0	0
RS_GCF_002707685.1	TRUE	p__Pseudomonadota	c__Gammaproteobacteria	o__Pseudomonadales	f__Porticoccaceae	g__Porticoccus	s__Porticoccus sp002707685	d__Bacteria	2745355	53.1896	1	0	1	0	0	95	0	68	0	0
GB_GCA_024641925.1	TRUE	p__Pseudomonadota	c__Gammaproteobacteria	o__Burkholderiales	f__Burkholderiaceae	g__Rubrivivax	s__Rubrivivax sp024641925	d__Bacteria	4944527	65.6202	2	0	0	0	0	128	0	0	0	0
RS_GCF_022809355.1	TRUE	p__Bacteroidota	c__Bacteroidia	o__Bacteroidales	f__Tannerellaceae	g__Parabacteroides	s__Parabacteroides faecalis	d__Bacteria	4308683	42.4841	1	0	0	0	0	111	0	0	0	0
GB_GCA_024280215.1	TRUE	p__Zixibacteria	c__MSB-5A5	o__GN15	f__FEB-12	g__QQUK01	s__QQUK01 sp024280215	d__Bacteria	3032430	36.5703	1	0	0	0	0	119	0	0	0	0
GB_GCA_019637445.1	FALSE	p__Gemmatimonadota	c__Gemmatimonadetes	o__Gemmatimonadales	f__Gemmatimonadaceae	g__PNKF01	s__PNKF01 sp019637445	d__Bacteria	3350692	68.1126	0	0	0	0	0	0	0	0	0	0
GB_GCA_027449545.1	TRUE	p__Acidobacteriota	c__Terriglobia	o__Terriglobales	f__Acidobacteriaceae	g__Occallatibacter	s__Occallatibacter sp027449545	d__Bacteria	4427244	62.6184	1	0	0	0	0	209	0	0	0	0
GB_GCA_947589425.1	TRUE	p__Cyanobacteriota	c__Vampirovibrionia	o__Gastranaerophilales	f__RUG14156	g__RUG14156	s__RUG14156 sp947589425	d__Bacteria	1873483	33.2231	1	0	0	0	0	119	0	0	0	0
GB_GCA_022846095.1	TRUE	p__Bacillota_A	c__Clostridia	o__Oscillospirales	f__Oscillospiraceae	g__UMGS1202	s__UMGS1202 sp900549565	d__Bacteria	4308696	63.8444	1	0	0	0	0	180	0	0	0	0
RS_GCF_001007875.1	TRUE	p__Pseudomonadota	c__Gammaproteobacteria	o__Chromatiales	f__Sedimenticolaceae	g__Sedimenticola	s__Sedimenticola thiotaurini	d__Bacteria	3962284	57.6152	1	0	0	0	0	111	0	0	0	0
RS_GCF_028858515.1	TRUE	p__Pseudomonadota	c__Alphaproteobacteria	o__Sphingomonadales	f__Sphingomonadaceae	g__Alteraurantiacibacter	s__Alteraurantiacibacter sp028858515	d__Bacteria	2574942	60.2523	1	0	0	0	0	189	0	0	0	0
RS_GCF_019977315.1	TRUE	p__Actinomycetota	c__Actinomycetes	o__Actinomycetales	f__Micrococcaceae	g__Arthrobacter	s__Arthrobacter sp006964045	d__Bacteria	4554426	62.028	1	0	0	0	0	242	0	0	0	0
GB_GCA_024707255.1	TRUE	p__Pseudomonadota	c__Alphaproteobacteria	o__Caulobacterales	f__Caulobacteraceae	g__Asticcacaulis	s__Asticcacaulis sp024707255	d__Bacteria	4136404	59.9649	1	0	0	0	0	204	0	0	0	0
RS_GCF_900142235.1	TRUE	p__Bacillota_A	c__Clostridia	o__Peptostreptococcales	f__Peptostreptococcaceae	g__Tepidibacter	s__Tepidibacter formicigenes	d__Bacteria	2639825	27.7293	1	0	0	0	0	176	0	0	0	0
RS_GCF_000820165.1	TRUE	p__Pseudomonadota	c__Gammaproteobacteria	o__Enterobacterales	f__Aeromonadaceae	g__Aeromonas	s__Aeromonas taiwanensis	d__Bacteria	4250891	62.8081	1	1	0	0	0	95	112	0	0	0
RS_GCF_000015445.1	FALSE	p__Pseudomonadota	c__Alphaproteobacteria	o__Rhizobiales	f__Rhizobiaceae	g__Bartonella	s__Bartonella bacilliformis	d__Bacteria	1445021	38.2387	0	0	0	0	0	0	0	0	0	0
RS_GCF_000009045.1	TRUE	p__Bacillota	c__Bacilli	o__Bacillales	f__Bacillaceae	g__Bacillus	s__Bacillus subtilis	d__Bacteria	4215606	43.5144	1	0	0	0	0	189	0	0	0	0
GB_GCA_905221035.1	TRUE	p__Bacillota	c__Bacilli	o__Lactobacillales	f__Streptococcaceae	g__Streptococcus	s__Streptococcus sp905221035	d__Bacteria	1958886	40.3485	1	0	0	0	0	182	0	0	0	0
RS_GCF_003932895.1	TRUE	p__Fusobacteriota	c__Fusobacteriia	o__Fusobacteriales	f__Leptotrichiaceae	g__Pseudoleptotrichia	s__Pseudoleptotrichia sp003932895	d__Bacteria	2516687	29.6386	1	0	0	0	0	106	0	0	0	0
RS_GCF_005049045.1	TRUE	p__Bacillota	c__Bacilli	o__Paenibacillales	f__Paenibacillaceae	g__Cohnella	s__Cohnella pontilimi	d__Bacteria	4289335	53.7044	1	0	0	0	0	188	0	0	0	0
RS_GCF_001870485.1	TRUE	p__Pseudomonadota	c__Gammaproteobacteria	o__Enterobacterales	f__Aeromonadaceae	g__Oceanisphaera	s__Oceanisphaera psychrotolerans	d__Bacteria	3819538	58.7177	1	1	1	0	0	95	109	58	0	0
RS_GCF_010686765.1	TRUE	p__Actinomycetota	c__Actinomycetes	o__Mycobacteriales	f__Geodermatophilaceae	g__Geodermatophilus	s__Geodermatophilus sabuli_A	d__Bacteria	4793157	74.3033	1	0	0	0	0	226	0	0	0	0
GB_GCA_002438805.1	TRUE	p__Bacteroidota	c__Bacteroidia	o__Bacteroidales	f__UBA932	g__Cryptobacteroides	s__Cryptobacteroides sp002438805	d__Bacteria	2158287	54.4861	1	0	0	0	0	96	0	0	0	0
RS_GCF_014189505.1	TRUE	p__Pseudomonadota	c__Alphaproteobacteria	o__Rhizobiales	f__Rhizobiaceae	g__Phyllobacterium	s__Phyllobacterium sp014189505	d__Bacteria	5254435	55.3971	1	0	0	0	0	197	0	0	0	0
RS_GCF_003171715.1	TRUE	p__Pseudomonadota	c__Alphaproteobacteria	o__Sphingomonadales	f__Sphingomonadaceae	g__Novosphingobium	s__Novosphingobium meiothermophilum	d__Bacteria	3474569	64.2524	1	0	0	0	0	194	0	0	0	0
GB_GCA_002792395.1	TRUE	p__Patescibacteria	c__Paceibacteria	o__Portnoybacterales	f__GCA-002795985	g__GCA-002795985	s__GCA-002795985 sp002792395	d__Bacteria	1017932	43.912	1	0	0	0	0	128	0	0	0	0
GB_GCA_021299695.1	TRUE	p__Planctomycetota	c__Planctomycetia	o__Pirellulales	f__Pirellulaceae	g__Pirellula_B	s__Pirellula_B sp021299695	d__Bacteria	5492797	54.7047	1	0	0	0	0	106	0	0	0	0
GB_GCA_029881675.1	FALSE	p__Patescibacteria	c__Microgenomatia	o__UBA1400	f__PJMF01	g__JAHDXH01	s__JAHDXH01 sp029881675	d__Bacteria	1082759	33.883	0	0	0	0	0	0	0	0	0	0
GB_GCA_015067255.1	TRUE	p__Bacillota_A	c__Clostridia	o__Oscillospirales	f__SIG519	g__SIG519	s__SIG519 sp015067255	d__Bacteria	1839517	37.2909	1	0	0	0	0	187	0	0	0	0
GB_GCA_944324675.1	TRUE	p__Elusimicrobiota	c__Elusimicrobia	o__Elusimicrobiales	f__Elusimicrobiaceae	g__UBA1174	s__UBA1174 sp944324675	d__Bacteria	1399677	46.0406	1	0	0	0	0	179	0	0	0	0
GB_GCA_024128875.1	TRUE	p__Actinomycetota	c__Acidimicrobiia	o__Acidimicrobiales	f__JACDCH01	g__UBA9382	s__UBA9382 sp024128875	d__Bacteria	4095387	71.7658	1	0	0	0	0	477	0	0	0	0
GB_GCA_025370075.1	TRUE	p__Bacteroidota	c__Bacteroidia	o__Cytophagales	f__Cyclobacteriaceae	g__ELB16-189	s__ELB16-189 sp025370075	d__Bacteria	4720360	41.7395	1	0	0	0	0	98	0	0	0	0
RS_GCF_022827545.1	TRUE	p__Bacteroidota	c__Bacteroidia	o__Cytophagales	f__Hymenobacteraceae	g__Hymenobacter	s__Hymenobacter tibetensis	d__Bacteria	6328632	55.6267	1	0	0	0	0	99	0	0	0	0
RS_GCF_001941505.1	TRUE	p__Actinomycetota	c__Actinomycetes	o__Mycobacteriales	f__Mycobacteriaceae	g__Corynebacterium	s__Corynebacterium sphenisci	d__Bacteria	2594799	74.7296	1	0	0	0	0	218	0	0	0	0
RS_GCF_003568865.1	TRUE	p__Actinomycetota	c__Rubrobacteria	o__Rubrobacterales	f__Rubrobacteraceae	g__Rubrobacter	s__Rubrobacter indicoceani	d__Bacteria	3078689	63.7632	1	0	0	0	0	189	0	0	0	0
RS_GCF_021057185.1	FALSE	p__Patescibacteria	c__JAEDAM01	o__Absconditabacterales	f__Absconditicoccaceae	g__Absconditicoccus	s__Absconditicoccus praedator	d__Bacteria	1129696	27.9326	0	0	0	0	0	0	0	0	0	0
RS_GCF_002890795.1	TRUE	p__Pseudomonadota	c__Gammaproteobacteria	o__Pseudomonadales	f__Pseudomonadaceae	g__Stutzerimonas	s__Stutzerimonas stutzeri_AA	d__Bacteria	4615749	61.7783	1	0	1	0	0	102	0	71	0	0
RS_GCF_001262715.1	FALSE	p__Bacillota_I	c__Bacilli_A	o__Mycoplasmatales	f__Mycoplasmataceae	g__Spiroplasma_A	s__Spiroplasma_A turonicum	d__Bacteria	1261374	24.1997	0	0	0	0	0	0	0	0	0	0
RS_GCF_029433445.1	TRUE	p__Bacillota	c__Bacilli	o__Lactobacillales	f__Lactobacillaceae	g__Lactobacillus	s__Lactobacillus sp029433445	d__Bacteria	1632206	38.4977	1	0	0	0	0	182	0	0	0	0
GB_GCA_903824575.1	TRUE	p__Pseudomonadota	c__Gammaproteobacteria	o__Burkholderiales	f__Methylophilaceae	g__CAIJXJ01	s__CAIJXJ01 sp903824575	d__Bacteria	3664524	53.7378	1	0	0	0	0	108	0	0	0	0
GB_GCA_003166795.1	FALSE	p__Acidobacteriota	c__Terriglobia	o__Acidoferrales	f__UBA7541	g__Palsa-295	s__Palsa-295 sp003166795	d__Bacteria	3924320	59.95	0	0	0	0	0	0	0	0	0	0
RS_GCF_026659735.1	TRUE	p__Bacillota	c__Bacilli	o__Staphylococcales	f__Staphylococcaceae	g__Staphylococcus	s__Staphylococcus sp943908435	d__Bacteria	2528283	38.7348	1	0	0	0	0	194	0	0	0	0
RS_GCF_021513135.1	TRUE	p__Pseudomonadota	c__Gammaproteobacteria	o__Enterobacterales	f__Vibrionaceae	g__GCA-021513135	s__GCA-021513135 sp021513135	d__Bacteria	4325556	38.6072	1	2	0	0	0	95	118	0	0	0
RS_GCF_004124325.1	TRUE	p__Actinomycetota	c__Actinomycetes	o__Streptomycetales	f__Streptomycetaceae	g__Streptomyces	s__Streptomyces sp004124325	d__Bacteria	8073926	71.6917	1	0	0	0	0	230	0	0	0	0
RS_GCF_000741295.1	TRUE	p__Actinomycetota	c__Actinomycetes	o__Actinomycetales	f__Bifidobacteriaceae	g__Bifidobacterium	s__Bifidobacterium globosum	d__Bacteria	1935255	63.3942	1	0	0	0	0	228	0	0	0	0
RS_GCF_022808595.1	TRUE	p__Pseudomonadota	c__Alphaproteobacteria	o__Rhizobiales	f__Beijerinckiaceae	g__Microvirga	s__Microvirga solisilvae	d__Bacteria	3706728	61.3935	1	0	0	0	0	191	0	0	0	0
GB_GCA_024230095.1	TRUE	p__Pseudomonadota	c__Gammaproteobacteria	o__Pseudomonadales	f__Nitrincolaceae	g__ASP10-02a	s__ASP10-02a sp024230095	d__Bacteria	3182886	47.5242	1	0	0	0	0	116	0	0	0	0
RS_GCF_009861505.1	TRUE	p__Pseudomonadota	c__Gammaproteobacteria	o__Pseudomonadales	f__Pseudomonadaceae	g__Pseudomonas_E	s__Pseudomonas_E izuensis	d__Bacteria	6867808	59.6133	1	0	1	0	0	102	0	71	0	0
RS_GCF_002743375.1	TRUE	p__Bacillota	c__Bacilli	o__Bacillales_A	f__Planococcaceae	g__Sporosarcina	s__Sporosarcina sp002743375	d__Bacteria	3262144	41.4203	1	0	0	0	0	184	0	0	0	0
RS_GCF_005146945.1	TRUE	p__Actinomycetota	c__Actinomycetes	o__Mycobacteriales	f__Pseudonocardiaceae	g__Prauserella_A	s__Prauserella_A endophytica	d__Bacteria	7908520	70.4478	1	0	0	0	0	228	0	0	0	0
RS_GCF_002979915.1	TRUE	p__Actinomycetota	c__Actinomycetes	o__Actinomycetales	f__Micrococcaceae	g__Glutamicibacter	s__Glutamicibacter sp002979915	d__Bacteria	3785151	55.7943	1	0	0	0	0	232	0	0	0	0
RS_GCF_009765905.1	TRUE	p__Bacteroidota	c__Bacteroidia	o__Sphingobacteriales	f__Sphingobacteriaceae	g__Mucilaginibacter	s__Mucilaginibacter sp009765905	d__Bacteria	5331597	40.0798	1	0	0	0	0	115	0	0	0	0
RS_GCF_000285575.1	TRUE	p__Bacillota_A	c__Clostridia	o__Clostridiales	f__Clostridiaceae	g__Clostridium_J	s__Clostridium_J senegalense	d__Bacteria	3925888	26.8671	1	0	0	0	0	174	0	0	0	0
RS_GCF_001425485.1	TRUE	p__Pseudomonadota	c__Alphaproteobacteria	o__Rhizobiales	f__Rhizobiaceae	g__Aureimonas_A	s__Aureimonas_A sp001425485	d__Bacteria	5438231	67.0182	1	0	0	0	0	192	0	0	0	0
RS_GCF_030718085.1	TRUE	p__Pseudomonadota	c__Gammaproteobacteria	o__Pseudomonadales	f__Oleiphilaceae	g__Marinobacter	s__Marinobacter sp030718085	d__Bacteria	3449993	55.0645	1	0	2	0	0	100	0	72	0	0
GB_GCA_002772815.1	TRUE	p__Patescibacteria	c__Gracilibacteria	o__Peribacterales	f__Peribacteraceae	g__UBA2170	s__UBA2170 sp002772815	d__Bacteria	1011331	42.3431	1	0	0	0	0	106	0	0	0	0
GB_GCA_009692925.1	FALSE	p__Chloroflexota	c__Dehalococcoidia	o__UBA3495	f__UBA3495	g__SHYG01	s__SHYG01 sp009692925	d__Bacteria	2065070	64.2888	0	0	0	0	0	0	0	0	0	0
GB_GCA_018384745.1	TRUE	p__Bacillota	c__Bacilli	o__Bacillales_A	f__Planococcaceae	g__Caryophanon	s__Caryophanon sp018384745	d__Bacteria	2149313	42.6076	1	0	0	0	0	186	0	0	0	0
GB_GCA_030263715.1	TRUE	p__Armatimonadota	c__Fimbriimonadia	o__Fimbriimonadales	f__ATM1	g__ATM1	s__ATM1 sp003577165	d__Bacteria	2766641	60.6733	1	0	0	0	0	179	0	0	0	0
GB_GCA_004535795.1	TRUE	p__Pseudomonadota	c__Gammaproteobacteria	o__Pseudomonadales	f__Porticoccaceae	g__LSUCC0057	s__LSUCC0057 sp004535795	d__Bacteria	2203110	59.3017	1	0	1	0	0	95	0	68	0	0
RS_GCF_030519475.1	TRUE	p__Actinomycetota	c__Actinomycetes	o__Mycobacteriales	f__Micromonosporaceae	g__Micromonospora	s__Micromonospora sp030519475	d__Bacteria	6646852	74.0236	1	0	0	0	0	215	0	0	0	0
GB_GCA_028724885.1	TRUE	p__Bacteroidota	c__Bacteroidia	o__Bacteroidales	f__UBA932	g__Cryptobacteroides	s__Cryptobacteroides sp028724885	d__Bacteria	2743398	47.6017	1	0	0	0	0	97	0	0	0	0
GB_GCA_011392765.1	TRUE	p__Pseudomonadota	c__Gammaproteobacteria	o__Chromatiales	f__Chromatiaceae	g__Thiosymbion	s__Thiosymbion ectosymbiont_A	d__Bacteria	5005132	57.5058	1	0	0	0	0	110	0	0	0	0
GB_GCA_024232965.1	TRUE	p__Verrucomicrobiota	c__Verrucomicrobiae	o__Verrucomicrobiales	f__Verrucomicrobiaceae	g__JACKQF01	s__JACKQF01 sp024232965	d__Bacteria	6538132	58.2807	1	0	0	0	0	205	0	0	0	0
GB_GCA_014192545.1	TRUE	p__Planctomycetota	c__Phycisphaerae	o__Phycisphaerales	f__UBA1924	g__BJHL01	s__BJHL01 sp014192545	d__Bacteria	3661429	60.1412	1	0	0	0	0	101	0	0	0	0
RS_GCF_002982135.1	TRUE	p__Bacillota	c__Bacilli	o__Lactobacillales	f__Lactobacillaceae	g__Pediococcus	s__Pediococcus inopinatus	d__Bacteria	2312041	38.6664	1	0	0	0	0	188	0	0	0	0
RS_GCF_009909195.1	TRUE	p__Bacillota	c__Bacilli	o__Paenibacillales	f__Paenibacillaceae	g__Paenibacillus_Z	s__Paenibacillus_Z sacheonensis	d__Bacteria	7436748	56.3484	1	0	0	0	0	181	0	0	0	0
RS_GCF_014642735.1	TRUE	p__Pseudomonadota	c__Alphaproteobacteria	o__Rhodobacterales	f__Rhodobacteraceae	g__Paracoccus	s__Paracoccus acridae	d__Bacteria	3989655	65.2972	1	0	0	0	0	191	0	0	0	0
RS_GCF_017744135.1	TRUE	p__Pseudomonadota	c__Gammaproteobacteria	o__Nevskiales	f__Salinisphaeraceae	g__Salinisphaera	s__Salinisphaera sp017744135	d__Bacteria	3736827	64.1583	1	0	0	0	0	108	0	0	0	0
GB_GCA_937139515.1	TRUE	p__Armatimonadota	c__Fimbriimonadia	o__Fimbriimonadales	f__GBS-DC	g__CAKZQI01	s__CAKZQI01 sp937139515	d__Bacteria	2690751	58.6538	1	0	0	0	0	193	0	0	0	0
RS_GCF_013624435.2	TRUE	p__Actinomycetota	c__Actinomycetes	o__Propionibacteriales	f__Nocardioidaceae	g__Nocardioides	s__Nocardioides campestrisoli	d__Bacteria	4206296	72.0984	1	0	0	0	0	205	0	0	0	0
GB_GCA_009923455.1	TRUE	p__Actinomycetota	c__Actinomycetes	o__Actinomycetales	f__Microbacteriaceae	g__Aquiluna	s__Aquiluna sp009923455	d__Bacteria	1641239	52.6685	1	0	0	0	0	201	0	0	0	0
RS_GCF_014652375.1	TRUE	p__Pseudomonadota	c__Gammaproteobacteria	o__Enterobacterales	f__Alteromonadaceae	g__Alishewanella	s__Alishewanella tabrizica	d__Bacteria	3744405	45.3977	1	0	1	0	0	95	0	60	0	0
RS_GCF_900102875.1	TRUE	p__Pseudomonadota	c__Gammaproteobacteria	o__Pseudomonadales	f__Halomonadaceae	g__Franzmannia	s__Franzmannia pantelleriensis	d__Bacteria	4402189	63.8957	1	0	1	0	0	102	0	101	0	0
RS_GCF_900250115.1	TRUE	p__Pseudomonadota	c__Gammaproteobacteria	o__Burkholderiales	f__Burkholderiaceae	g__Cupriavidus	s__Cupriavidus taiwanensis_B	d__Bacteria	7009602	66.9065	1	0	0	0	0	116	0	0	0	0
RS_GCF_008124615.1	TRUE	p__Desulfobacterota	c__Desulfuromonadia	o__Desulfuromonadales	f__Geothermobacteraceae	g__Geothermobacter	s__Geothermobacter ehrlichii	d__Bacteria	3235950	61.8553	1	0	0	0	0	183	0	0	0	0
RS_GCF_001558155.1	TRUE	p__Pseudomonadota	c__Alphaproteobacteria	o__Rhodobacterales	f__Rhodobacteraceae	g__Tropicimonas	s__Tropicimonas sabulilitoris	d__Bacteria	5324675	62.4155	1	0	0	0	0	192	0	0	0	0
RS_GCF_022170785.1	TRUE	p__Bacillota	c__Bacilli	o__Bacillales_B	f__Bacillaceae_B	g__Rossellomorea	s__Rossellomorea marisflavi_B	d__Bacteria	4310313	48.2606	1	0	0	0	0	193	0	0	0	0
RS_GCF_019431045.1	TRUE	p__Bacillota_A	c__Clostridia	o__Clostridiales	f__Clostridiaceae	g__Clostridium	s__Clostridium weizhouense	d__Bacteria	3962696	26.4637	1	0	0	0	0	175	0	0	0	0
RS_GCF_016861565.1	TRUE	p__Bacillota	c__Bacilli	o__Lactobacillales	f__Lactobacillaceae	g__Secundilactobacillus	s__Secundilactobacillus yichangensis	d__Bacteria	2703434	44.2821	1	0	0	0	0	185	0	0	0	0
RS_GCF_012641275.1	TRUE	p__Bacteroidota	c__Bacteroidia	o__Chitinophagales	f__Chitinophagaceae	g__Chitinophaga	s__Chitinophaga varians_A	d__Bacteria	8459112	49.6125	1	0	0	0	0	99	0	0	0	0
GB_GCA_009744235.1	TRUE	p__Pseudomonadota	c__Alphaproteobacteria	o__Rhizobiales	f__Rhizobiaceae	g__Allorhizobium	s__Allorhizobium vitis_G	d__Bacteria	5839406	57.5528	1	0	0	0	0	188	0	0	0	0
RS_GCF_030499155.1	TRUE	p__Actinomycetota	c__Actinomycetes	o__Mycobacteriales	f__Mycobacteriaceae	g__Mycobacterium	s__Mycobacterium frederiksbergense_A	d__Bacteria	6033909	67.4812	1	0	0	0	0	223	0	0	0	0
GB_GCA_015075165.1	TRUE	p__Pseudomonadota	c__Gammaproteobacteria	o__Burkholderiales	f__Burkholderiaceae	g__JAEUPI01	s__JAEUPI01 sp015075165	d__Bacteria	5066124	70.1599	1	0	0	0	0	110	0	0	0	0
GB_GCA_001873465.1	TRUE	p__Patescibacteria	c__ABY1	o__UBA2591	f__CG2-30-36-38	g__CG2-30-36-38	s__CG2-30-36-38 sp001873465	d__Bacteria	463448	36.2644	1	0	0	0	0	107	0	0	0	0
GB_GCA_016871575.1	FALSE	p__Verrucomicrobiota	c__Verrucomicrobiae	o__Palsa-1439	f__Palsa-1439	g__CAIKAP01	s__CAIKAP01 sp016871575	d__Bacteria	5193540	60.5984	0	0	0	0	0	0	0	0	0	0
GB_GCA_910577835.1	FALSE	p__Bacillota_A	c__Clostridia	o__Lachnospirales	f__Lachnospiraceae	g__CAG-303	s__CAG-303 sp910577835	d__Bacteria	3889157	37.2552	0	0	0	0	0	0	0	0	0	0
RS_GCF_000224005.2	TRUE	p__Pseudomonadota	c__Gammaproteobacteria	o__Chromatiales	f__Chromatiaceae	g__Marichromatium	s__Marichromatium purpuratum	d__Bacteria	3779112	67.8641	1	0	0	0	0	115	0	0	0	0
GB_GCA_018652265.1	TRUE	p__Patescibacteria	c__Gracilibacteria	o__Peribacterales	f__JABICL01	g__JABICL01	s__JABICL01 sp018652265	d__Bacteria	1069784	38.0484	1	0	0	0	0	102	0	0	0	0
GB_GCA_001783525.1	TRUE	p__Patescibacteria	c__Paceibacteria	o__UBA9973	f__UBA918	g__OLB19	s__OLB19 sp001783525	d__Bacteria	632575	46.6036	1	0	0	0	0	121	0	0	0	0
RS_GCF_900156415.1	TRUE	p__Bacteroidota	c__Bacteroidia	o__Cytophagales	f__Hymenobacteraceae	g__Pontibacter	s__Pontibacter lucknowensis	d__Bacteria	4474059	50.1488	1	0	0	0	0	100	0	0	0	0
RS_GCF_000378345.1	TRUE	p__Pseudomonadota	c__Alphaproteobacteria	o__Caulobacterales	f__Hyphomonadaceae	g__Hirschia	s__Hirschia maritima	d__Bacteria	3351270	44.6233	1	0	0	0	0	191	0	0	0	0
RS_GCF_900184815.1	TRUE	p__Pseudomonadota	c__Alphaproteobacteria	o__Rhodobacterales	f__Rhodobacteraceae	g__Boseongicola	s__Boseongicola aestuarii	d__Bacteria	4001270	57.914	1	0	0	0	0	189	0	0	0	0
RS_GCF_900637305.1	TRUE	p__Pseudomonadota	c__Gammaproteobacteria	o__Cardiobacteriales	f__Cardiobacteriaceae	g__Cardiobacterium	s__Cardiobacterium hominis	d__Bacteria	2670755	59.2265	1	0	0	0	0	95	0	0	0	0
RS_GCF_001999765.1	TRUE	p__Actinomycetota	c__Actinomycetes	o__Actinomycetales	f__Micrococcaceae	g__Sinomonas	s__Sinomonas mesophila	d__Bacteria	4008197	71.1354	1	0	0	0	0	243	0	0	0	0
RS_GCF_026810225.1	TRUE	p__Bacillota_A	c__Thermoanaerobacteria	o__Caldicellulosiruptorales	f__Caldicellulosiruptoraceae	g__Caldicellulosiruptor	s__Caldicellulosiruptor morganii	d__Bacteria	2475467	36.4986	1	0	0	0	0	181	0	0	0	0
RS_GCF_000818395.1	TRUE	p__Pseudomonadota	c__Gammaproteobacteria	o__Burkholderiales	f__Burkholderiaceae	g__Noviherbaspirillum	s__Noviherbaspirillum autotrophicum	d__Bacteria	5384605	59.912	2	0	0	0	0	115	0	0	0	0
RS_GCF_004352855.1	TRUE	p__Pseudomonadota	c__Gammaproteobacteria	o__Pseudomonadales	f__Marinomonadaceae	g__Marinomonas	s__Marinomonas sp004352855	d__Bacteria	3753874	45.6708	2	0	1	0	0	130	0	69	0	0
RS_GCF_004168285.1	TRUE	p__Bacteroidota	c__Bacteroidia	o__Cytophagales	f__Spirosomataceae	g__Emticicia	s__Emticicia agri	d__Bacteria	6650851	38.5578	1	0	0	0	0	120	0	0	0	0
RS_GCF_009649815.1	TRUE	p__Actinomycetota	c__Actinomycetes	o__Mycobacteriales	f__Mycobacteriaceae	g__Nocardia	s__Nocardia sp009649815	d__Bacteria	9052329	65.8102	1	0	0	0	0	240	0	0	0	0
RS_GCF_006517255.1	TRUE	p__Pseudomonadota	c__Gammaproteobacteria	o__Burkholderiales	f__Burkholderiaceae	g__Janthinobacterium	s__Janthinobacterium tructae	d__Bacteria	6314370	62.3546	1	0	0	0	0	120	0	0	0	0
GB_GCA_027118455.1	TRUE	p__Actinomycetota	c__Actinomycetes	o__JAHEKZ01	f__JAHEKZ01	g__JAHEKZ01	s__JAHEKZ01 sp027118455	d__Bacteria	2832720	65.2107	1	0	0	0	0	212	0	0	0	0
GB_GCA_015075075.1	FALSE	p__Desulfobacterota	c__GWC2-55-46	o__GWC2-55-46	f__GWC2-55-46	g__UBA5799	s__UBA5799 sp015075075	d__Bacteria	2617048	58.281	0	0	0	0	0	0	0	0	0	0
GB_GCA_015055905.1	TRUE	p__Bacillota_A	c__Clostridia	o__Christensenellales	f__UBA1242	g__RGIG1681	s__RGIG1681 sp015055905	d__Bacteria	1189104	34.7794	1	0	0	0	0	175	0	0	0	0
RS_GCF_017303055.1	TRUE	p__Pseudomonadota	c__Gammaproteobacteria	o__Pseudomonadales	f__Halomonadaceae	g__Halomonas	s__Halomonas litopenaei_A	d__Bacteria	4576535	61.9159	1	0	1	0	0	102	0	68	0	0
GB_GCA_016715505.1	TRUE	p__Bacteroidota	c__Bacteroidia	o__Chitinophagales	f__Chitinophagaceae	g__OLB11	s__OLB11 sp016715505	d__Bacteria	3983432	40.2866	1	0	0	0	0	101	0	0	0	0
GB_GCA_934747255.1	FALSE	p__Bacillota_A	c__Clostridia	o__Christensenellales	f__UBA1242	g__CAKVNM01	s__CAKVNM01 sp934747255	d__Bacteria	1041406	31.8257	0	0	0	0	0	0	0	0	0	0
GB_GCA_029011315.1	TRUE	p__Desulfobacterota	c__Desulfovibrionia	o__Desulfovibrionales	f__Desulfovibrionaceae	g__Bilophila	s__Bilophila sp029011315	d__Bacteria	1485434	50.3239	1	0	0	0	0	182	0	0	0	0
RS_GCF_002135235.1	TRUE	p__Pseudomonadota	c__Gammaproteobacteria	o__Pseudomonadales	f__Moraxellaceae	g__Acinetobacter	s__Acinetobacter silvestris	d__Bacteria	3129605	38.058	1	0	0	0	0	113	0	0	0	0
RS_GCF_014698795.1	TRUE	p__Cyanobacteriota	c__Cyanobacteriia	o__Cyanobacteriales	f__Nostocaceae	g__Nostoc	s__Nostoc sp014698795	d__Bacteria	9033956	41.4335	1	0	0	0	0	213	0	0	0	0
GB_GCA_905221255.1	TRUE	p__Bacillota	c__Bacilli	o__Lactobacillales	f__Streptococcaceae	g__Streptococcus	s__Streptococcus sp905221255	d__Bacteria	1911639	40.9973	1	0	0	0	0	182	0	0	0	0
GB_GCA_937870585.1	TRUE	p__Pseudomonadota	c__Alphaproteobacteria	o__Sphingomonadales	f__Sphingomonadaceae	g__Aquisediminimonas	s__Aquisediminimonas sp937870585	d__Bacteria	3802783	61.4133	1	0	0	0	0	189	0	0	0	0
GB_GCA_015494735.1	TRUE	p__WOR-3	c__Hydrothermia	o__LBFQ01	f__DSFT01	g__S143-66	s__S143-66 sp015494735	d__Bacteria	1762927	51.9465	1	0	0	0	0	96	0	0	0	0
GB_GCA_007096045.1	TRUE	p__Cyanobacteriota	c__Cyanobacteriia	o__Cyanobacteriales	f__Microcystaceae	g__Microcystis	s__Microcystis novacekii	d__Bacteria	4698201	42.7529	1	0	0	0	0	199	0	0	0	0
GB_GCA_016795545.1	TRUE	p__Verrucomicrobiota	c__Verrucomicrobiae	o__Opitutales	f__Opitutaceae	g__Lacunisphaera	s__Lacunisphaera sp016795545	d__Bacteria	3545358	69.348	1	0	0	0	0	125	0	0	0	0
GB_GCA_019118565.1	TRUE	p__Bacteroidota	c__Bacteroidia	o__Bacteroidales	f__Rikenellaceae	g__Alistipes	s__Alistipes avicola	d__Bacteria	1811358	53.0948	1	0	0	0	0	98	0	0	0	0
RS_GCF_003054245.1	TRUE	p__Bacillota	c__Bacilli	o__Thermoactinomycetales	f__DSM-45169	g__Melghirimyces	s__Melghirimyces profundicolus	d__Bacteria	3768904	55.0697	1	0	0	0	0	186	0	0	0	0
RS_GCF_000725805.1	TRUE	p__Actinomycetota	c__Actinomycetes	o__Streptomycetales	f__Streptomycetaceae	g__Streptomyces	s__Streptomyces xanthophaeus	d__Bacteria	8621934	72.2381	1	0	0	0	0	265	0	0	0	0
RS_GCF_001436295.1	TRUE	p__Bacillota	c__Bacilli	o__Lactobacillales	f__Lactobacillaceae	g__Paucilactobacillus	s__Paucilactobacillus vaccinostercus	d__Bacteria	2559201	43.4884	1	0	0	0	0	184	0	0	0	0
GB_GCA_910575835.1	TRUE	p__Bacillota_A	c__Clostridia	o__Lachnospirales	f__Lachnospiraceae	g__Sporofaciens	s__Sporofaciens sp910575835	d__Bacteria	5266706	46.3052	1	0	0	0	0	178	0	0	0	0
RS_GCF_947496855.1	TRUE	p__Bacteroidota	c__Bacteroidia	o__Flavobacteriales	f__Flavobacteriaceae	g__Aquimarina	s__Aquimarina sp947496855	d__Bacteria	5831167	32.5308	1	1	0	0	0	100	99	0	0	0
RS_GCF_923081025.1	TRUE	p__Bacteroidota	c__Bacteroidia	o__Chitinophagales	f__Saprospiraceae	g__Neolewinella	s__Neolewinella maritima	d__Bacteria	4244706	59.7759	1	0	0	0	0	100	0	0	0	0
GB_GCA_945862215.1	TRUE	p__Planctomycetota	c__Phycisphaerae	o__Phycisphaerales	f__SM1A02	g__F1-60-MAGs104	s__F1-60-MAGs104 sp945862215	d__Bacteria	2791439	51.423	1	0	0	0	0	98	0	0	0	0
RS_GCF_000146285.1	TRUE	p__Actinomycetota	c__Actinomycetes	o__Actinomycetales	f__Actinomycetaceae	g__Mobiluncus	s__Mobiluncus curtisii	d__Bacteria	2152970	55.6585	1	0	0	0	0	207	0	0	0	0
RS_GCF_002960425.1	TRUE	p__Bacillota	c__Bacilli	o__Lactobacillales	f__Streptococcaceae	g__Streptococcus	s__Streptococcus suis_S	d__Bacteria	2096121	42.2644	1	0	0	0	0	180	0	0	0	0
GB_GCA_012275575.1	TRUE	p__Pseudomonadota	c__Gammaproteobacteria	o__Burkholderiales	f__Burkholderiaceae	g__Paraburkholderia	s__Paraburkholderia sp012275575	d__Bacteria	7236796	63.0259	1	0	0	0	0	118	0	0	0	0
RS_GCF_011355085.1	TRUE	p__Pseudomonadota	c__Gammaproteobacteria	o__Pseudomonadales	f__Pseudomonadaceae	g__Pseudomonas_E	s__Pseudomonas_E akapageensis	d__Bacteria	6373949	60.2048	1	0	1	0	0	102	0	71	0	0
RS_GCF_001434275.1	TRUE	p__Bacillota	c__Bacilli	o__Lactobacillales	f__Lactobacillaceae	g__Companilactobacillus	s__Companilactobacillus mindensis	d__Bacteria	2336411	38.2135	1	0	0	0	0	182	0	0	0	0
RS_GCF_010500865.1	TRUE	p__Pseudomonadota	c__Gammaproteobacteria	o__Enterobacterales	f__Alteromonadaceae	g__Alteromonas	s__Alteromonas profundi	d__Bacteria	4391362	44.3595	1	0	1	0	0	95	0	58	0	0
RS_GCF_012911815.1	TRUE	p__Pseudomonadota	c__Gammaproteobacteria	o__Enterobacterales	f__Alteromonadaceae	g__Alteromonas	s__Alteromonas ponticola	d__Bacteria	3602801	46.0696	1	0	1	0	0	95	0	58	0	0
RS_GCF_001431205.1	TRUE	p__Bacillota	c__Bacilli	o__Staphylococcales	f__Staphylococcaceae	g__Staphylococcus	s__Staphylococcus sp001431205	d__Bacteria	2730867	33.0687	1	0	0	0	0	188	0	0	0	0
GB_GCA_030652805.1	TRUE	p__JAHJDO01	c__JAHJDO01	o__JAHJDO01	f__JAHJDO01	g__JAHJDO01	s__JAHJDO01 sp030652805	d__Bacteria	2001061	37.7863	1	0	0	0	0	118	0	0	0	0
GB_GCA_031253995.1	TRUE	p__Pseudomonadota	c__Gammaproteobacteria	o__Pseudomonadales	f__Pseudomonadaceae	g__Pseudomonas_E	s__Pseudomonas_E sp031253995	d__Bacteria	6319506	64.652	1	0	1	0	0	102	0	71	0	0
GB_GCA_004552485.1	TRUE	p__Bacteroidota	c__Bacteroidia	o__Bacteroidales	f__Muribaculaceae	g__CAG-873	s__CAG-873 sp004552485	d__Bacteria	2318070	59.9029	1	0	0	0	0	97	0	0	0	0
GB_GCA_002792535.1	TRUE	p__Patescibacteria	c__Gracilibacteria	o__UBA1369	f__LOWO2-01-FULL-3	g__UM-FILTER-38-24	s__UM-FILTER-38-24 sp002792535	d__Bacteria	1102626	37.6035	1	0	0	0	0	183	0	0	0	0
GB_GCA_030145485.1	TRUE	p__Pseudomonadota	c__Gammaproteobacteria	o__Chromatiales	f__Sedimenticolaceae	g__Sva-25	s__Sva-25 sp030145485	d__Bacteria	3022916	52.3304	2	0	0	0	0	117	0	0	0	0
RS_GCF_027625475.1	TRUE	p__Pseudomonadota	c__Alphaproteobacteria	o__Sphingomonadales	f__Sphingomonadaceae	g__Sphingomonas_N	s__Sphingomonas_N sp027625475	d__Bacteria	4429509	66.0733	1	0	0	0	0	198	0	0	0	0
RS_GCF_000012565.1	TRUE	p__Pseudomonadota	c__Alphaproteobacteria	o__Rickettsiales	f__Anaplasmataceae	g__Ehrlichia	s__Ehrlichia canis	d__Bacteria	1315030	28.9577	1	0	0	0	0	197	0	0	0	0
RS_GCF_000494755.1	TRUE	p__Actinomycetota	c__Actinomycetes	o__Mycobacteriales	f__Micromonosporaceae	g__Actinoplanes	s__Actinoplanes friuliensis	d__Bacteria	9376071	70.3551	1	0	0	0	0	206	0	0	0	0
RS_GCF_000590925.1	TRUE	p__Pseudomonadota	c__Alphaproteobacteria	o__Rhodobacterales	f__Rhodobacteraceae	g__Roseibacterium	s__Roseibacterium elongatum	d__Bacteria	3555109	65.7424	1	0	0	0	0	191	0	0	0	0
RS_GCF_005280275.1	TRUE	p__Pseudomonadota	c__Gammaproteobacteria	o__Enterobacterales	f__Vibrionaceae	g__Salinivibrio	s__Salinivibrio kushneri	d__Bacteria	3443290	50.7104	1	1	1	0	0	95	116	56	0	0
GB_GCA_016716185.1	TRUE	p__Bacteroidota	c__Bacteroidia	o__Chitinophagales	f__Saprospiraceae	g__Vicinibacter	s__Vicinibacter sp016716185	d__Bacteria	3821971	40.1896	1	0	0	0	0	101	0	0	0	0
GB_GCA_029225085.1	TRUE	p__Actinomycetota	c__Coriobacteriia	o__Coriobacteriales	f__Eggerthellaceae	g__JAQXVU01	s__JAQXVU01 sp029225085	d__Bacteria	1928956	58.6662	1	0	0	0	0	189	0	0	0	0
GB_GCA_905212345.1	FALSE	p__Pseudomonadota	c__Gammaproteobacteria	o__Burkholderiales	f__Burkholderiaceae	g__Aphodousia	s__Aphodousia sp905212345	d__Bacteria	1901547	46.7696	0	0	0	0	0	0	0	0	0	0
RS_GCF_026011795.1	TRUE	p__Actinomycetota	c__Actinomycetes	o__Actinomycetales	f__Micrococcaceae	g__Arthrobacter_F	s__Arthrobacter_F mangrovi	d__Bacteria	4426898	67.982	1	0	0	0	0	243	0	0	0	0
GB_GCA_024276355.1	TRUE	p__Actinomycetota	c__Acidimicrobiia	o__Acidimicrobiales	f__Aldehydirespiratoraceae	g__SZUA-87	s__SZUA-87 sp024276355	d__Bacteria	3604789	64.4283	1	0	0	0	0	192	0	0	0	0
GB_GCA_007133365.1	TRUE	p__Bacillota_E	c__SLMV01	o__SLMV01	f__SLMV01	g__SLMV01	s__SLMV01 sp007133365	d__Bacteria	1910474	53.746	1	0	0	0	0	176	0	0	0	0
RS_GCF_022179065.1	TRUE	p__Pseudomonadota	c__Alphaproteobacteria	o__Rhizobiales	f__Beijerinckiaceae	g__Methylobacterium	s__Methylobacterium adhaesivum	d__Bacteria	4677674	68.4967	1	0	0	0	0	206	0	0	0	0
RS_GCF_002151125.1	TRUE	p__Actinomycetota	c__Actinomycetes	o__Actinomycetales	f__Microbacteriaceae	g__Clavibacter	s__Clavibacter michiganensis_C	d__Bacteria	3024150	73.4736	1	0	0	0	0	229	0	0	0	0
RS_GCF_004345705.1	TRUE	p__Bacillota_A	c__Clostridia	o__Peptostreptococcales	f__Thermotaleaceae	g__Marinisporobacter	s__Marinisporobacter balticus	d__Bacteria	3865388	32.3514	1	0	0	0	0	176	0	0	0	0
RS_GCF_014385005.1	TRUE	p__Bacillota_A	c__Clostridia	o__Lachnospirales	f__Lachnospiraceae	g__Muricoprocola	s__Muricoprocola shaoxingensis	d__Bacteria	3649426	42.7196	1	0	0	0	0	176	0	0	0	0
RS_GCF_008831085.1	TRUE	p__Actinomycetota	c__Actinomycetes	o__Actinomycetales	f__Microbacteriaceae	g__Pseudoclavibacter_C	s__Pseudoclavibacter_C endophyticus	d__Bacteria	3256946	69.5556	1	0	0	0	0	264	0	0	0	0
RS_GCF_002021875.1	TRUE	p__Actinomycetota	c__Actinomycetes	o__Streptomycetales	f__Streptomycetaceae	g__Streptomyces	s__Streptomyces hygroscopicus_B	d__Bacteria	12012215	70.7501	1	0	0	0	0	229	0	0	0	0
GB_GCA_016842085.1	TRUE	p__Chloroflexota	c__Anaerolineae	o__Thermoflexales	f__Thermoflexaceae	g__Thermoflexus	s__Thermoflexus tengchongensis	d__Bacteria	3891019	64.5395	1	0	0	0	0	179	0	0	0	0
RS_GCF_001424045.1	TRUE	p__Pseudomonadota	c__Alphaproteobacteria	o__Rhizobiales	f__Rhizobiaceae	g__Ferranicluibacter	s__Ferranicluibacter sp001424045	d__Bacteria	5085900	63.5771	1	0	0	0	0	190	0	0	0	0
GB_GCA_015277795.1	TRUE	p__Pseudomonadota	c__Gammaproteobacteria	o__Burkholderiales	f__Burkholderiaceae	g__Telluria	s__Telluria sp015277795	d__Bacteria	5302561	65.9284	1	0	0	0	0	118	0	0	0	0
RS_GCF_025642115.1	TRUE	p__Pseudomonadota	c__Gammaproteobacteria	o__Burkholderiales	f__Chitinibacteraceae	g__Chitiniphilus	s__Chitiniphilus sp025642115	d__Bacteria	4186520	64.827	1	0	0	0	0	107	0	0	0	0
RS_GCF_900460345.1	TRUE	p__Actinomycetota	c__Actinomycetes	o__Actinomycetales	f__Actinomycetaceae	g__Trueperella	s__Trueperella pyogenes	d__Bacteria	2310711	59.574	1	0	0	0	0	218	0	0	0	0
GB_GCA_018897535.1	TRUE	p__Dependentiae	c__Babeliae	o__Babeliales	f__UASB340	g__UASB340	s__UASB340 sp018897535	d__Bacteria	1062222	29.2451	1	0	0	0	0	120	0	0	0	0
RS_GCF_000257865.1	TRUE	p__Bacillota	c__Bacilli	o__Lactobacillales	f__Streptococcaceae	g__Streptococcus	s__Streptococcus mitis_CQ	d__Bacteria	2018798	39.7497	1	0	0	0	0	182	0	0	0	0
RS_GCF_000417905.1	TRUE	p__Pseudomonadota	c__Gammaproteobacteria	o__Enterobacterales	f__Vibrionaceae	g__Vibrio	s__Vibrio natriegens	d__Bacteria	5130031	45.031	1	1	1	0	0	95	108	57	0	0
GB_GCA_002894685.1	TRUE	p__Bacteroidota	c__Rhodothermia	o__Rhodothermales	f__Salinibacteraceae	g__Salinibacter	s__Salinibacter luteus	d__Bacteria	3550109	65.8966	1	0	0	0	0	106	0	0	0	0
RS_GCF_000373565.1	TRUE	p__Actinomycetota	c__Actinomycetes	o__Streptomycetales	f__Streptomycetaceae	g__Streptomyces	s__Streptomyces sp000373565	d__Bacteria	9161949	71.1485	1	0	0	0	0	231	0	0	0	0
RS_GCF_008151785.1	TRUE	p__Bacillota_A	c__Clostridia	o__Peptostreptococcales	f__Peptostreptococcaceae	g__Peptacetobacter	s__Peptacetobacter hiranonis	d__Bacteria	2521899	31.2793	2	0	0	0	0	190	0	0	0	0
RS_GCF_016811235.1	TRUE	p__Pseudomonadota	c__Alphaproteobacteria	o__Rhizobiales	f__Beijerinckiaceae	g__Microvirga	s__Microvirga arabica	d__Bacteria	6671803	62.4614	2	0	0	0	0	190	0	0	0	0
RS_GCF_900172215.1	TRUE	p__Pseudomonadota	c__Alphaproteobacteria	o__Rhodobacterales	f__Rhodobacteraceae	g__Ruegeria	s__Ruegeria meonggei	d__Bacteria	4543068	57.3016	1	0	0	0	0	187	0	0	0	0
RS_GCF_000158475.2	TRUE	p__Pseudomonadota	c__Gammaproteobacteria	o__Burkholderiales	f__Burkholderiaceae	g__Oxalobacter	s__Oxalobacter paraformigenes	d__Bacteria	2488386	52.6762	1	0	0	0	0	115	0	0	0	0
GB_GCA_943788235.1	TRUE	p__Bacteroidota	c__Bacteroidia	o__Cytophagales	f__Cyclobacteriaceae	g__UBA4465	s__UBA4465 sp943788235	d__Bacteria	3248610	37.6375	1	0	0	0	0	99	0	0	0	0
RS_GCF_007671675.1	TRUE	p__Pseudomonadota	c__Gammaproteobacteria	o__Pseudomonadales	f__Oleiphilaceae	g__Marinobacter	s__Marinobacter maritimus	d__Bacteria	4357025	54.494	1	0	2	0	0	102	0	75	0	0
RS_GCF_026015965.1	TRUE	p__Bacillota_C	c__Negativicutes	o__Selenomonadales	f__Selenomonadaceae	g__Selenomonas	s__Selenomonas sp905372355	d__Bacteria	2614080	56.8835	1	0	0	0	0	181	0	0	0	0
RS_GCF_023221775.1	TRUE	p__Bacillota	c__Bacilli	o__Lactobacillales	f__Enterococcaceae	g__Enterococcus_E	s__Enterococcus_E cecorum_A	d__Bacteria	2553798	35.9777	1	0	0	0	0	182	0	0	0	0
GB_GCA_018818965.1	FALSE	p__Patescibacteria	c__JABMPQ01	o__JABMPQ01	f__JABMPQ01	g__JABMPQ01	s__JABMPQ01 sp018818965	d__Bacteria	1202857	43.0537	0	0	0	0	0	0	0	0	0	0
RS_GCF_004359985.1	TRUE	p__Pseudomonadota	c__Gammaproteobacteria	o__Burkholderiales	f__Burkholderiaceae	g__Paraburkholderia	s__Paraburkholderia flava	d__Bacteria	6970102	63.3653	1	0	0	0	0	119	0	0	0	0
GB_GCA_029066805.1	TRUE	p__Bacillota_A	c__Clostridia	o__Christensenellales	f__Pumilibacteraceae	g__Anaerocaecibacter	s__Anaerocaecibacter sp029066805	d__Bacteria	1925202	48.5203	1	0	0	0	0	182	0	0	0	0
GB_GCA_938092135.1	TRUE	p__Acidobacteriota	c__Aminicenantia	o__Aminicenantales	f__CALLJL01	g__CALLJL01	s__CALLJL01 sp938092135	d__Bacteria	2838572	41.7891	1	0	0	0	0	178	0	0	0	0
RS_GCF_003966715.1	TRUE	p__Pseudomonadota	c__Alphaproteobacteria	o__Rhizobiales	f__Xanthobacteraceae	g__Blastochloris	s__Blastochloris tepida	d__Bacteria	3949390	68.3043	1	0	0	0	0	193	0	0	0	0
RS_GCF_024749165.1	TRUE	p__Pseudomonadota	c__Gammaproteobacteria	o__Pseudomonadales	f__Pseudomonadaceae	g__Pseudomonas_E	s__Pseudomonas_E sp024749165	d__Bacteria	5874598	63.9864	1	0	1	0	0	102	0	71	0	0
RS_GCF_024129355.1	TRUE	p__Pseudomonadota	c__Gammaproteobacteria	o__Pseudomonadales	f__Moraxellaceae	g__Acinetobacter	s__Acinetobacter lwoffii_I	d__Bacteria	3353864	42.8981	1	0	0	0	0	110	0	0	0	0
RS_GCF_027271155.1	TRUE	p__Pseudomonadota	c__Alphaproteobacteria	o__Caulobacterales	f__Caulobacteraceae	g__Brevundimonas	s__Brevundimonas subvibrioides_D	d__Bacteria	2973988	67.2354	1	0	0	0	0	219	0	0	0	0
RS_GCF_021502725.1	TRUE	p__Bacteroidota	c__Bacteroidia	o__Cytophagales	f__Spirosomataceae	g__Dyadobacter	s__Dyadobacter sp021502725	d__Bacteria	6583725	40.8637	1	0	0	0	0	125	0	0	0	0
GB_GCA_903876685.1	TRUE	p__Pseudomonadota	c__Gammaproteobacteria	o__Burkholderiales	f__Gallionellaceae	g__Gallionella	s__Gallionella sp903876685	d__Bacteria	4821208	50.434	1	0	0	0	0	107	0	0	0	0
GB_GCA_944350405.1	TRUE	p__Bacillota_I	c__Bacilli_A	o__RF39	f__UBA660	g__UMGS1449	s__UMGS1449 sp944350405	d__Bacteria	927225	25.9115	1	0	0	0	0	176	0	0	0	0
GB_GCA_012719195.1	TRUE	p__Chloroflexota	c__Anaerolineae	o__DRVO01	f__DRVO01	g__Ch71	s__Ch71 sp012719195	d__Bacteria	2929200	66.8321	1	0	0	0	0	207	0	0	0	0
RS_GCF_014197535.1	TRUE	p__Pseudomonadota	c__Alphaproteobacteria	o__Rhizobiales	f__Rhizobiaceae	g__Rhizobium	s__Rhizobium aethiopicum_A	d__Bacteria	6494267	61.117	1	0	0	0	0	191	0	0	0	0
RS_GCF_002240225.1	TRUE	p__Bacillota	c__Bacilli	o__Paenibacillales	f__Paenibacillaceae	g__Paenibacillus_A	s__Paenibacillus_A physcomitrellae	d__Bacteria	4828665	50.6979	1	0	0	0	0	187	0	0	0	0
RS_GCF_900168195.1	TRUE	p__Pseudomonadota	c__Alphaproteobacteria	o__Rhizobiales	f__Beijerinckiaceae	g__Bosea	s__Bosea thiooxidans	d__Bacteria	5369373	67.3843	1	0	0	0	0	202	0	0	0	0
RS_GCF_002954685.1	TRUE	p__Bacteroidota	c__Bacteroidia	o__Flavobacteriales	f__Flavobacteriaceae	g__Polaribacter	s__Polaribacter porphyrae	d__Bacteria	3904103	29.0495	1	0	0	0	0	102	0	0	0	0
RS_GCF_938029845.1	TRUE	p__Bacteroidota	c__Bacteroidia	o__Flavobacteriales	f__Flavobacteriaceae	g__Capnocytophaga	s__Capnocytophaga sp938029845	d__Bacteria	3000345	39.6083	1	0	0	0	0	96	0	0	0	0
RS_GCF_003258705.1	TRUE	p__Bacteroidota	c__Bacteroidia	o__Cytophagales	f__Spirosomataceae	g__Arcticibacterium	s__Arcticibacterium luteifluviistationis	d__Bacteria	5379839	37.1974	1	0	0	0	0	117	0	0	0	0
RS_GCF_001269925.1	TRUE	p__Pseudomonadota	c__Gammaproteobacteria	o__Pseudomonadales	f__Pseudomonadaceae	g__Pseudomonas_E	s__Pseudomonas_E sp001269925	d__Bacteria	6815860	60.669	1	0	0	0	0	101	0	0	0	0
RS_GCF_002000085.1	TRUE	p__Pseudomonadota	c__Gammaproteobacteria	o__Enterobacterales	f__Alteromonadaceae	g__Pseudocolwellia	s__Pseudocolwellia agarivorans	d__Bacteria	4722645	35.8247	2	1	1	0	0	121	119	57	0	0
GB_GCA_002838815.1	TRUE	p__Bacillota_A	c__Clostridia	o__Clostridiales	f__Clostridiaceae	g__JG1575	s__JG1575 sp002838815	d__Bacteria	2379488	52.3311	1	0	0	0	0	183	0	0	0	0
GB_GCA_005887895.1	FALSE	p__Methylomirabilota	c__Methylomirabilia	o__Rokubacteriales	f__CSP1-6	g__AR5	s__AR5 sp005887895	d__Bacteria	5541258	71.051	0	0	0	0	0	0	0	0	0	0
GB_GCA_016875395.1	FALSE	p__Myxococcota_A	c__UBA9160	o__UBA9160	f__UBA6930	g__VGRF01	s__VGRF01 sp016875395	d__Bacteria	4514420	70.2474	0	0	0	0	0	0	0	0	0	0
RS_GCF_900451095.1	FALSE	p__Campylobacterota	c__Campylobacteria	o__Campylobacterales	f__Helicobacteraceae	g__Helicobacter_B	s__Helicobacter_B canis_B	d__Bacteria	2237085	44.8897	0	0	0	0	0	0	0	0	0	0
RS_GCF_946902045.1	TRUE	p__Pseudomonadota	c__Gammaproteobacteria	o__Burkholderiales	f__Neisseriaceae	g__Neisseria	s__Neisseria sp946902045	d__Bacteria	2354813	49.2025	1	0	0	0	0	104	0	0	0	0
GB_GCA_024397995.1	TRUE	p__Pseudomonadota	c__Alphaproteobacteria	o__Rhodospirillales_A	f__Casp-alpha2	g__UBA1479	s__UBA1479 sp024397995	d__Bacteria	3933246	62.9822	1	0	0	0	0	193	0	0	0	0
RS_GCF_003428335.1	TRUE	p__Pseudomonadota	c__Gammaproteobacteria	o__Nevskiales	f__Nevskiaceae	g__Solimonas_A	s__Solimonas_A sp003428335	d__Bacteria	5373342	67.0903	1	0	0	0	0	107	0	0	0	0
RS_GCF_947499845.1	TRUE	p__Actinomycetota	c__Actinomycetes	o__Actinomycetales	f__Quadrisphaeraceae	g__Pseudokineococcus	s__Pseudokineococcus sp947499845	d__Bacteria	3720873	76.9283	1	0	0	0	0	245	0	0	0	0
GB_GCA_017456885.1	TRUE	p__Bacteroidota	c__Bacteroidia	o__Bacteroidales	f__Paludibacteraceae	g__RGIG9608	s__RGIG9608 sp017456885	d__Bacteria	1920639	41.4294	1	0	0	0	0	96	0	0	0	0
GB_GCA_903850725.1	TRUE	p__Patescibacteria	c__Paceibacteria	o__Paceibacterales	f__Staskawiczbacteraceae	g__XYB1-FULL-32-11	s__XYB1-FULL-32-11 sp903850725	d__Bacteria	1012803	32.9914	1	0	0	0	0	126	0	0	0	0
RS_GCF_004101785.1	TRUE	p__Bacillota_A	c__Clostridia	o__Tissierellales	f__Tissierellaceae	g__Gudongella	s__Gudongella oleilytica	d__Bacteria	2356157	42.4142	1	0	0	0	0	178	0	0	0	0
RS_GCF_001623075.1	TRUE	p__Pseudomonadota	c__Alphaproteobacteria	o__Rhizobiales	f__Stappiaceae	g__Pseudovibrio	s__Pseudovibrio sp001623075	d__Bacteria	5875058	51.131	1	0	0	0	0	196	0	0	0	0
RS_GCF_002906795.1	TRUE	p__Pseudomonadota	c__Gammaproteobacteria	o__Pseudomonadales	f__Pseudomonadaceae	g__Pseudomonas_E	s__Pseudomonas_E putida_Y	d__Bacteria	5976331	61.1225	1	0	1	0	0	102	0	71	0	0
RS_GCF_946227095.1	TRUE	p__Pseudomonadota	c__Gammaproteobacteria	o__Enterobacterales	f__Enterobacteriaceae	g__Serratia_J	s__Serratia_J proteamaculans_E	d__Bacteria	5585395	55.0481	1	1	1	0	0	95	113	56	0	0
RS_GCF_013410945.1	TRUE	p__Actinomycetota	c__Actinomycetes	o__Actinomycetales	f__Microbacteriaceae	g__Rhodoglobus	s__Rhodoglobus sp013410945	d__Bacteria	3013378	66.8144	1	0	0	0	0	223	0	0	0	0
RS_GCF_002930195.1	FALSE	p__Pseudomonadota	c__Alphaproteobacteria	o__Holosporales	f__Holosporaceae	g__Holospora	s__Holospora curviuscula	d__Bacteria	1715500	37.6248	0	0	0	0	0	0	0	0	0	0
RS_GCF_000701785.1	FALSE	p__Bacillota_I	c__Bacilli_A	o__Mycoplasmatales	f__Mycoplasmoidaceae	g__Mycoplasmoides	s__Mycoplasmoides alvi	d__Bacteria	840640	24.9743	0	0	0	0	0	0	0	0	0	0
GB_GCA_026707945.1	TRUE	p__Pseudomonadota	c__Gammaproteobacteria	o__Pseudomonadales_A	f__Azotimanducaceae	g__Bin55	s__Bin55 sp026707945	d__Bacteria	3800628	51.0749	1	0	0	0	0	101	0	0	0	0
GB_GCA_017556795.1	TRUE	p__Patescibacteria	c__Saccharimonadia	o__Saccharimonadales	f__Nanosyncoccaceae	g__Nanosyncoccus	s__Nanosyncoccus sp017556795	d__Bacteria	674245	46.2743	1	0	0	0	0	120	0	0	0	0
RS_GCF_029360805.1	TRUE	p__Bacteroidota	c__Bacteroidia	o__Sphingobacteriales	f__Sphingobacteriaceae	g__Daejeonella	s__Daejeonella sp029360805	d__Bacteria	4095353	44.2108	1	0	0	0	0	113	0	0	0	0
RS_GCF_001623525.1	TRUE	p__Pseudomonadota	c__Gammaproteobacteria	o__Pseudomonadales	f__Pseudomonadaceae	g__Pseudomonas_E	s__Pseudomonas_E fluorescens_Q	d__Bacteria	6921098	60.5366	1	0	1	0	0	102	0	71	0	0
RS_GCF_000768345.1	TRUE	p__Pseudomonadota	c__Gammaproteobacteria	o__Xanthomonadales	f__Xanthomonadaceae	g__Lysobacter_C	s__Lysobacter_C concretionis	d__Bacteria	3032117	67.2391	1	0	0	0	0	109	0	0	0	0
RS_GCF_003025595.1	TRUE	p__Pseudomonadota	c__Gammaproteobacteria	o__Enterobacterales	f__Vibrionaceae	g__Photobacterium	s__Photobacterium ganghwense	d__Bacteria	5533005	50.4618	1	1	1	0	0	95	114	57	0	0
GB_GCA_018649625.1	FALSE	p__Marinisomatota	c__Marinisomatia	o__Marinisomatales	f__UBA1611	g__GCA-2722105	s__GCA-2722105 sp018649625	d__Bacteria	2392419	34.9783	0	0	0	0	0	0	0	0	0	0
GB_GCA_020050775.1	FALSE	p__Patescibacteria	c__Paceibacteria	o__UBA9973	f__SBAW01	g__GWA1-54-10	s__GWA1-54-10 sp020050775	d__Bacteria	553959	49.3529	0	0	0	0	0	0	0	0	0	0
RS_GCF_021261315.1	TRUE	p__Bacteroidota	c__Bacteroidia	o__Flavobacteriales	f__Weeksellaceae	g__Epilithonimonas	s__Epilithonimonas sp021261315	d__Bacteria	4169017	37.1692	1	0	0	0	0	96	0	0	0	0
GB_GCA_016928915.1	TRUE	p__Patescibacteria	c__Gracilibacteria	o__UBA1369	f__PNNO01	g__JAFGJT01	s__JAFGJT01 sp016928915	d__Bacteria	1127696	38.5065	1	0	0	0	0	190	0	0	0	0
GB_GCA_027487895.1	TRUE	p__Bacteroidota	c__Bacteroidia	o__Chitinophagales	f__Chitinophagaceae	g__Sediminibacterium	s__Sediminibacterium sp027487895	d__Bacteria	2211795	38.2628	1	0	0	0	0	99	0	0	0	0
GB_GCA_024206335.1	TRUE	p__Pseudomonadota	c__Gammaproteobacteria	o__Chromatiales	f__Sedimenticolaceae	g__JAAGZL01	s__JAAGZL01 sp024206335	d__Bacteria	4277064	50.1259	1	0	0	0	0	109	0	0	0	0
GB_GCA_027491075.1	TRUE	p__Bacteroidota	c__Bacteroidia	o__Flavobacteriales	f__UA16	g__JAIXWP01	s__JAIXWP01 sp027491075	d__Bacteria	3021296	41.5855	1	0	0	0	0	96	0	0	0	0
GB_GCA_027858235.1	TRUE	p__Patescibacteria	c__ABY1	o__BM507	f__BM507	g__BM507	s__BM507 sp027858235	d__Bacteria	1431675	33.3499	1	0	0	0	0	101	0	0	0	0
RS_GCF_022811605.1	TRUE	p__Actinomycetota	c__Actinomycetes	o__Actinomycetales	f__Microbacteriaceae	g__Agromyces	s__Agromyces soli	d__Bacteria	3810275	72.1778	1	0	0	0	0	234	0	0	0	0
GB_GCA_003251015.1	TRUE	p__Bacteroidota	c__Bacteroidia	o__Bacteroidales	f__Marinilabiliaceae	g__SZUA-582	s__SZUA-582 sp003251015	d__Bacteria	3109809	37.7784	1	0	0	0	0	99	0	0	0	0
RS_GCF_006152145.1	TRUE	p__Pseudomonadota	c__Alphaproteobacteria	o__Rhodobacterales	f__Rhodobacteraceae	g__Rubellimicrobium	s__Rubellimicrobium roseum	d__Bacteria	4851245	69.1232	1	0	0	0	0	204	0	0	0	0
RS_GCF_900142935.1	TRUE	p__Pseudomonadota	c__Alphaproteobacteria	o__Rhodobacterales	f__Rhodobacteraceae	g__Rhodovulum	s__Rhodovulum sp900142935	d__Bacteria	3832939	68.1309	1	0	0	0	0	187	0	0	0	0
RS_GCF_002127225.1	TRUE	p__Pseudomonadota	c__Alphaproteobacteria	o__Sphingomonadales	f__Sphingomonadaceae	g__Sphingomonas	s__Sphingomonas sp002127225	d__Bacteria	4293819	67.8078	1	0	0	0	0	195	0	0	0	0
GB_GCA_030617085.1	TRUE	p__Omnitrophota	c__Koll11	o__Tantalellales	f__Tantalellaceae	g__Makaraimicrobium	s__Makaraimicrobium sp030617085	d__Bacteria	1079317	54.3711	1	0	0	0	0	182	0	0	0	0
RS_GCF_002812205.1	TRUE	p__Spirochaetota	c__Leptospirae	o__Leptospirales	f__Leptospiraceae	g__Leptospira_B	s__Leptospira_B neocaledonica	d__Bacteria	4213808	40.1699	1	0	0	0	0	95	0	0	0	0
GB_GCA_002689385.1	TRUE	p__Planctomycetota	c__Phycisphaerae	o__Phycisphaerales	f__SM1A02	g__GCA-002718515	s__GCA-002718515 sp002689385	d__Bacteria	1937263	45.101	1	0	0	0	0	107	0	0	0	0
RS_GCF_016918785.1	TRUE	p__Spirochaetota	c__Leptospirae	o__Leptospirales	f__Leptospiraceae	g__Leptospira	s__Leptospira ainazelensis	d__Bacteria	4864687	42.6143	1	0	0	0	0	95	0	0	0	0
RS_GCF_007096355.1	TRUE	p__Pseudomonadota	c__Alphaproteobacteria	o__Rhodobacterales	f__Rhodobacteraceae	g__Paracoccus	s__Paracoccus sp007096355	d__Bacteria	4408317	63.8902	1	0	0	0	0	191	0	0	0	0
GB_GCA_031291035.1	TRUE	p__Desulfobacterota	c__Desulfovibrionia	o__Desulfovibrionales	f__Desulfovibrionaceae	g__Desulfovibrio	s__Desulfovibrio sp031291035	d__Bacteria	2038611	58.4911	1	0	0	0	0	179	0	0	0	0
GB_GCA_002778965.1	FALSE	p__Patescibacteria	c__ABY1	o__UBA2196	f__GWA2-42-15	g__GCA-002787375	s__GCA-002787375 sp002778965	d__Bacteria	788340	37.1599	0	0	0	0	0	0	0	0	0	0
GB_GCA_024277655.1	FALSE	p__Desulfobacterota	c__Desulfobulbia	o__Desulfobulbales	f__Desulfurivibrionaceae	g__JAJRUT01	s__JAJRUT01 sp024277655	d__Bacteria	2668053	48.0581	0	0	0	0	0	0	0	0	0	0
GB_GCA_016720565.1	TRUE	p__Bacteroidota	c__Bacteroidia	o__Chitinophagales	f__Chitinophagaceae	g__JJ008	s__JJ008 sp016720565	d__Bacteria	3489940	44.1782	1	0	0	0	0	99	0	0	0	0
GB_GCA_023150895.1	TRUE	p__Myxococcota	c__Bradymonadia	o__UBA7976	f__UBA1532	g__CAINDO01	s__CAINDO01 sp023150895	d__Bacteria	9208049	71.0912	1	0	0	0	0	117	0	0	0	0
RS_GCF_001664485.1	TRUE	p__Pseudomonadota	c__Alphaproteobacteria	o__Rhizobiales	f__Rhizobiaceae	g__Rhizobium	s__Rhizobium sp001664485	d__Bacteria	6972593	61.4378	1	0	0	0	0	191	0	0	0	0
RS_GCF_003236385.1	TRUE	p__Actinomycetota	c__Actinomycetes	o__Streptosporangiales	f__Streptosporangiaceae	g__Spongiactinospora	s__Spongiactinospora gelatinilytica	d__Bacteria	8049107	70.8067	1	0	0	0	0	234	0	0	0	0
RS_GCF_025854335.1	TRUE	p__Pseudomonadota	c__Alphaproteobacteria	o__Rhizobiales	f__Devosiaceae	g__Pelagibacterium	s__Pelagibacterium sp002375765	d__Bacteria	3930456	60.6993	1	0	0	0	0	189	0	0	0	0
RS_GCF_013186535.1	TRUE	p__Actinomycetota	c__Actinomycetes	o__Mycobacteriales	f__Mycobacteriaceae	g__Nocardia	s__Nocardia terpenica	d__Bacteria	9269950	68.5152	1	0	0	0	0	202	0	0	0	0
GB_GCA_910574635.1	TRUE	p__Bacillota_A	c__Clostridia	o__Oscillospirales	f__Oscillospiraceae	g__Dysosmobacter	s__Dysosmobacter sp009774015	d__Bacteria	4480127	58.4267	1	0	0	0	0	181	0	0	0	0
RS_GCF_002090075.1	TRUE	p__Actinomycetota	c__Actinomycetes	o__Actinomycetales	f__Demequinaceae	g__Demequina	s__Demequina sp002090075	d__Bacteria	2614118	69.6193	1	0	0	0	0	226	0	0	0	0
GB_GCA_947462105.1	FALSE	p__Pseudomonadota	c__Alphaproteobacteria	o__Micropepsales	f__Micropepsaceae	g__Rhizomicrobium	s__Rhizomicrobium sp947462105	d__Bacteria	2166834	64.726	0	0	0	0	0	0	0	0	0	0
GB_GCA_947305705.1	TRUE	p__Patescibacteria	c__Saccharimonadia	o__Saccharimonadales	f__Nanosyncoccaceae	g__UBA2834	s__UBA2834 sp947305705	d__Bacteria	884992	44.9924	1	0	0	0	0	120	0	0	0	0
GB_GCA_947453445.1	TRUE	p__Bacteroidota	c__Bacteroidia	o__B-17B0	f__B-17BO	g__UBA2475	s__UBA2475 sp947453445	d__Bacteria	3721827	37.9283	1	0	0	0	0	102	0	0	0	0
RS_GCF_001435755.1	TRUE	p__Bacillota	c__Bacilli	o__Lactobacillales	f__Lactobacillaceae	g__Ligilactobacillus	s__Ligilactobacillus acidipiscis	d__Bacteria	2326083	39.0716	1	0	0	0	0	184	0	0	0	0
RS_GCF_020829445.1	TRUE	p__Cyanobacteriota	c__Cyanobacteriia	o__Cyanobacteriales	f__Nostocaceae	g__Nostoc	s__Nostoc sp020829445	d__Bacteria	7457132	42.5523	1	0	0	0	0	211	0	0	0	0
RS_GCF_026183675.1	TRUE	p__Pseudomonadota	c__Gammaproteobacteria	o__Pseudomonadales	f__Cellvibrionaceae	g__Microbulbifer	s__Microbulbifer halophilus	d__Bacteria	4655510	61.6809	1	0	1	0	0	96	0	83	0	0
RS_GCF_023544465.1	TRUE	p__Actinomycetota	c__Actinomycetes	o__Mycobacteriales	f__Micromonosporaceae	g__Actinoplanes	s__Actinoplanes maris	d__Bacteria	9353428	70.9479	1	0	0	0	0	206	0	0	0	0
RS_GCF_020539505.1	TRUE	p__Pseudomonadota	c__Gammaproteobacteria	o__Burkholderiales	f__Burkholderiaceae	g__Pusillimonas_E	s__Pusillimonas_E faecipullorum	d__Bacteria	3144116	57.4556	1	0	0	0	0	108	0	0	0	0
RS_GCF_026013365.1	TRUE	p__Bacillota	c__Bacilli	o__Paenibacillales	f__Paenibacillaceae	g__Paenibacillus	s__Paenibacillus sp026013365	d__Bacteria	7230638	45.7021	1	0	0	0	0	187	0	0	0	0
GB_GCA_002869275.1	TRUE	p__Bacteroidota	c__SZUA-365	o__SZUA-365	f__SZUA-365	g__BM516	s__BM516 sp002869275	d__Bacteria	3929095	56.4054	1	0	0	0	0	98	0	0	0	0
GB_GCA_022822445.1	FALSE	p__Gemmatimonadota	c__Gemmatimonadetes	o__Longimicrobiales	f__UBA6960	g__Bin94	s__Bin94 sp022822445	d__Bacteria	4289885	68.0877	0	0	0	0	0	0	0	0	0	0
GB_GCA_019636375.1	FALSE	p__Planctomycetota	c__Planctomycetia	o__Pirellulales	f__Pirellulaceae	g__BJ22	s__BJ22 sp019636375	d__Bacteria	5238678	51.5244	0	0	0	0	0	0	0	0	0	0
RS_GCF_029876145.1	TRUE	p__Pseudomonadota	c__Gammaproteobacteria	o__Enterobacterales	f__Enterobacteriaceae	g__Escherichia	s__Escherichia ruysiae	d__Bacteria	4501754	50.6989	1	1	1	1	0	95	113	55	45	0
RS_GCF_016469335.1	TRUE	p__Pseudomonadota	c__Gammaproteobacteria	o__Enterobacterales	f__Alteromonadaceae	g__Flocculibacter	s__Flocculibacter collagenilyticus	d__Bacteria	3973578	39.9812	2	1	1	0	0	137	137	57	0	0
RS_GCF_000734895.2	TRUE	p__Cyanobacteriota	c__Cyanobacteriia	o__Cyanobacteriales	f__Nostocaceae	g__336-3	s__336-3 sp000734895	d__Bacteria	6420126	41.0969	1	0	0	0	0	214	0	0	0	0
RS_GCF_022965755.1	TRUE	p__Pseudomonadota	c__Gammaproteobacteria	o__Xanthomonadales	f__Xanthomonadaceae	g__Pseudoxanthomonas_A	s__Pseudoxanthomonas_A sp022965755	d__Bacteria	3971652	68.5451	1	0	0	0	0	106	0	0	0	0
GB_GCA_029549885.1	TRUE	p__Planctomycetota	c__Planctomycetia	o__Pirellulales	f__Thermoguttaceae	g__Thermogutta	s__Thermogutta sp029549885	d__Bacteria	4590110	55.7211	1	0	0	0	0	116	0	0	0	0
GB_GCA_020831765.1	TRUE	p__Planctomycetota	c__Phycisphaerae	o__Phycisphaerales	f__Phycisphaeraceae	g__JAFIFY01	s__JAFIFY01 sp020831765	d__Bacteria	4714536	62.3627	1	0	0	0	0	100	0	0	0	0
RS_GCF_018283675.1	TRUE	p__Bacillota	c__Bacilli	o__Bacillales	f__Bacillaceae	g__Metabacillus_B	s__Metabacillus_B flavus	d__Bacteria	4032488	43.7948	1	0	0	0	0	189	0	0	0	0
GB_GCA_018433585.1	TRUE	p__Elusimicrobiota	c__Endomicrobiia	o__Endomicrobiales	f__Endomicrobiaceae	g__JAHDQW01	s__JAHDQW01 sp018433585	d__Bacteria	1855567	34.6383	1	0	0	0	0	182	0	0	0	0
GB_GCA_001776775.1	FALSE	p__Patescibacteria	c__Microgenomatia	o__Daviesbacterales	f__UBA10151	g__HO2-FULL-47-45	s__HO2-FULL-47-45 sp001776775	d__Bacteria	1124621	42.2352	0	0	0	0	0	0	0	0	0	0
RS_GCF_000023785.1	TRUE	p__Pseudomonadota	c__Alphaproteobacteria	o__Caulobacterales	f__Hyphomonadaceae	g__Hirschia	s__Hirschia baltica	d__Bacteria	3540114	45.1898	1	0	0	0	0	191	0	0	0	0
RS_GCF_000688235.1	TRUE	p__Pseudomonadota	c__Alphaproteobacteria	o__Rhodospirillales_A	f__Terasakiellaceae	g__Terasakiella	s__Terasakiella pusilla	d__Bacteria	4053560	50.0206	1	0	0	0	0	192	0	0	0	0
RS_GCF_026107375.2	TRUE	p__Pseudomonadota	c__Alphaproteobacteria	o__Sphingomonadales	f__Sphingomonadaceae	g__Sphingomonas	s__Sphingomonas sp026107375	d__Bacteria	4077375	67.3099	1	0	0	0	0	192	0	0	0	0
RS_GCF_014192285.1	TRUE	p__Pseudomonadota	c__Gammaproteobacteria	o__Pseudomonadales	f__Halomonadaceae	g__Halomonas	s__Halomonas fontilapidosi	d__Bacteria	3598958	65.4008	1	0	1	0	0	102	0	68	0	0
RS_GCF_003269275.1	TRUE	p__Bacillota_C	c__Negativicutes	o__Acidaminococcales	f__Acidaminococcaceae	g__Phascolarctobacterium	s__Phascolarctobacterium faecium	d__Bacteria	2317131	43.7467	1	0	0	0	0	178	0	0	0	0
GB_GCA_900100835.1	TRUE	p__Bacillota_C	c__Negativicutes	o__Selenomonadales	f__Selenomonadaceae	g__Selenomonas_A	s__Selenomonas_A ruminantium_E	d__Bacteria	2748281	50.0087	1	0	0	0	0	180	0	0	0	0
RS_GCF_000312305.1	TRUE	p__Bacteroidota	c__Bacteroidia	o__Bacteroidales	f__Bacteroidaceae	g__Prevotella	s__Prevotella conceptionensis	d__Bacteria	4080115	46.9554	1	0	0	0	0	99	0	0	0	0
RS_GCF_901873445.1	TRUE	p__Bacillota	c__Bacilli	o__Staphylococcales	f__Gemellaceae	g__Gemella	s__Gemella haemolysans_C	d__Bacteria	1922556	30.6589	1	0	0	0	0	181	0	0	0	0
RS_GCF_000344155.1	TRUE	p__Actinomycetota	c__Actinomycetes	o__Mycobacteriales	f__Mycobacteriaceae	g__Gordonia	s__Gordonia paraffinivorans	d__Bacteria	4632332	68.9263	1	0	0	0	0	271	0	0	0	0
GB_GCA_948472945.1	TRUE	p__Bacillota_A	c__Clostridia	o__Lachnospirales	f__Lachnospiraceae	g__V9D3004	s__V9D3004 sp948472945	d__Bacteria	2682328	40.9385	1	0	0	0	0	228	0	0	0	0
GB_GCA_002378195.1	FALSE	p__Patescibacteria	c__Paceibacteria	o__UBA9973	f__UBA918	g__OLB19	s__OLB19 sp002378195	d__Bacteria	902885	44.4455	0	0	0	0	0	0	0	0	0	0
GB_GCA_945878845.1	TRUE	p__Pseudomonadota	c__Alphaproteobacteria	o__Sphingomonadales	f__Sphingomonadaceae	g__Erythrobacter	s__Erythrobacter sanguineus_A	d__Bacteria	3218910	66.6156	1	0	0	0	0	188	0	0	0	0
GB_GCA_028292665.1	TRUE	p__Pseudomonadota	c__Gammaproteobacteria	o__Burkholderiales	f__Burkholderiaceae	g__JAQGLW01	s__JAQGLW01 sp028292665	d__Bacteria	4334345	56.4475	1	0	0	0	0	121	0	0	0	0
RS_GCF_004137345.1	TRUE	p__Actinomycetota	c__Actinomycetes	o__Propionibacteriales	f__Nocardioidaceae	g__Nocardioides	s__Nocardioides zhouii	d__Bacteria	4604445	70.6514	1	0	0	0	0	209	0	0	0	0
GB_GCA_016200085.1	FALSE	p__Methylomirabilota	c__Methylomirabilia	o__Rokubacteriales	f__CSP1-6	g__JACQFL01	s__JACQFL01 sp016200085	d__Bacteria	3566302	71.1891	0	0	0	0	0	0	0	0	0	0
GB_GCA_003612485.1	TRUE	p__Bacillota_A	c__Clostridia	o__Lachnospirales	f__Lachnospiraceae	g__Acetatifactor	s__Acetatifactor sp003612485	d__Bacteria	4960820	50.8352	1	0	0	0	0	175	0	0	0	0
GB_GCA_003598175.1	TRUE	p__Hinthialibacterota	c__Hinthialibacteria	o__Hinthialibacterales	f__Hinthialibacteraceae	g__SURF-12	s__SURF-12 sp003598175	d__Bacteria	6882332	49.7225	2	0	0	0	0	183	0	0	0	0
GB_GCA_013414745.1	TRUE	p__Bacteroidota	c__Bacteroidia	o__Chitinophagales	f__Chitinophagaceae	g__OLB11	s__OLB11 sp013414745	d__Bacteria	4268916	42.1521	2	0	0	0	0	121	0	0	0	0
GB_GCA_031258545.1	TRUE	p__Verrucomicrobiota	c__Verrucomicrobiae	o__Opitutales	f__UBA9783	g__CABUVL01	s__CABUVL01 sp031258545	d__Bacteria	1021500	42.077	1	0	0	0	0	110	0	0	0	0
GB_GCA_022447545.1	FALSE	p__Myxococcota_A	c__UBA9160	o__UBA9160	f__SMWR01	g__JAKVBI01	s__JAKVBI01 sp022447545	d__Bacteria	5912276	61.9235	0	0	0	0	0	0	0	0	0	0
GB_GCA_027483645.1	TRUE	p__Bacteroidota	c__Bacteroidia	o__Chitinophagales	f__CAIOSU01	g__CAIOSU01	s__CAIOSU01 sp027483645	d__Bacteria	4270577	46.4429	1	0	0	0	0	99	0	0	0	0
GB_GCA_029194535.1	TRUE	p__Nitrospirota	c__Nitrospiria	o__Nitrospirales	f__Nitrospiraceae	g__Nitrospira_C	s__Nitrospira_C sp029194535	d__Bacteria	3979322	59.4545	1	0	0	0	0	168	0	0	0	0
RS_GCF_001735715.1	TRUE	p__Bacteroidota	c__Bacteroidia	o__Flavobacteriales	f__Flavobacteriaceae	g__GCA001735715	s__GCA001735715 sp001735715	d__Bacteria	2016454	36.3657	1	0	0	0	0	101	0	0	0	0
RS_GCF_013343235.1	TRUE	p__Cyanobacteriota	c__Cyanobacteriia	o__Cyanobacteriales	f__Nostocaceae	g__Nostoc	s__Nostoc sp013343235	d__Bacteria	7887247	41.2865	1	0	0	0	0	214	0	0	0	0
RS_GCF_003611475.1	TRUE	p__Pseudomonadota	c__Gammaproteobacteria	o__Pseudomonadales	f__Moraxellaceae	g__Acinetobacter	s__Acinetobacter rongchengensis	d__Bacteria	4102130	37.6685	1	0	0	0	0	112	0	0	0	0
GB_GCA_943353165.1	TRUE	p__Patescibacteria	c__Saccharimonadia	o__Saccharimonadales	f__OMJO01	g__CALRAM01	s__CALRAM01 sp943353165	d__Bacteria	639318	42.395	1	0	0	0	0	120	0	0	0	0
GB_GCA_949300345.1	TRUE	p__Bacillota_I	c__Bacilli_A	o__RFN20	f__CAG-826	g__UBA4951	s__UBA4951 sp949300345	d__Bacteria	1053145	52.3421	1	0	0	0	0	184	0	0	0	0
GB_GCA_027484985.1	TRUE	p__Pseudomonadota	c__Alphaproteobacteria	o__Rhodobacterales	f__Rhodobacteraceae	g__Gemmobacter_B	s__Gemmobacter_B sp027484985	d__Bacteria	3636313	65.2564	1	0	0	0	0	191	0	0	0	0
GB_GCA_000431235.1	TRUE	p__Bacillota_I	c__Bacilli_A	o__ML615J-28	f__CAG-698	g__CAG-698	s__CAG-698 sp000431235	d__Bacteria	1865014	28.1764	1	0	0	0	0	185	0	0	0	0
RS_GCF_001592045.1	TRUE	p__Actinomycetota	c__Actinomycetes	o__Streptosporangiales	f__Streptosporangiaceae	g__Thermobifida	s__Thermobifida fusca	d__Bacteria	3643897	67.5428	1	0	0	0	0	226	0	0	0	0
RS_GCF_024129435.1	TRUE	p__Pseudomonadota	c__Gammaproteobacteria	o__Pseudomonadales	f__Moraxellaceae	g__Acinetobacter	s__Acinetobacter lwoffii_F	d__Bacteria	3174516	42.9596	1	0	0	0	0	110	0	0	0	0
RS_GCF_014905135.1	TRUE	p__Campylobacterota	c__Campylobacteria	o__Campylobacterales	f__Sulfurimonadaceae	g__Sulfurimonas	s__Sulfurimonas paralvinellae	d__Bacteria	2078871	38.5136	1	1	0	0	0	177	109	0	0	0
RS_GCF_000739015.1	TRUE	p__Pseudomonadota	c__Alphaproteobacteria	o__Rhizobiales	f__Beijerinckiaceae	g__Microvirga	s__Microvirga sp000739015	d__Bacteria	5655736	62.9391	1	0	0	0	0	190	0	0	0	0
RS_GCF_001832905.1	TRUE	p__Bacillota	c__Bacilli	o__Lactobacillales	f__Streptococcaceae	g__Floricoccus	s__Floricoccus tropicus	d__Bacteria	2157756	32.9826	1	0	0	0	0	183	0	0	0	0
RS_GCF_019805165.1	TRUE	p__Pseudomonadota	c__Alphaproteobacteria	o__Azospirillales	f__Azospirillaceae	g__Azospirillum	s__Azospirillum sp019805165	d__Bacteria	7361017	67.9175	1	0	0	0	0	196	0	0	0	0
GB_GCA_023511615.1	TRUE	p__Cyanobacteriota	c__Cyanobacteriia	o__Leptolyngbyales	f__Leptolyngbyaceae	g__Leptothermofonsia	s__Leptothermofonsia sp023511615	d__Bacteria	5287283	50.4169	1	0	0	0	0	222	0	0	0	0
RS_GCF_002835935.1	TRUE	p__Pseudomonadota	c__Gammaproteobacteria	o__Enterobacterales	f__Alteromonadaceae	g__Paraglaciecola	s__Paraglaciecola sp002835935	d__Bacteria	6478889	41.2279	2	1	1	0	0	124	118	58	0	0
RS_GCF_004187715.1	TRUE	p__Actinomycetota	c__Actinomycetes	o__Streptomycetales	f__Streptomycetaceae	g__Streptomyces	s__Streptomyces sp004187715	d__Bacteria	9724482	70.2857	1	0	0	0	0	230	0	0	0	0
GB_GCA_020851375.1	FALSE	p__Nitrospirota	c__9FT-COMBO-42-15	o__HDB-SIOI813	f__HDB-SIOI813	g__RBG-16-43-11	s__RBG-16-43-11 sp020851375	d__Bacteria	2496842	46.2731	0	0	0	0	0	0	0	0	0	0
GB_GCA_023451265.1	TRUE	p__Actinomycetota	c__Actinomycetes	o__Actinomycetales	f__Microbacteriaceae	g__Microbacterium	s__Microbacterium sp023451265	d__Bacteria	3066457	70.3206	1	0	0	0	0	221	0	0	0	0
GB_GCA_030698395.1	TRUE	p__Patescibacteria	c__ABY1	o__UBA9570	f__UBA9570	g__JAUYKW01	s__JAUYKW01 sp030698395	d__Bacteria	1316576	36.2142	1	0	0	0	0	122	0	0	0	0
GB_GCA_018812905.1	TRUE	p__Patescibacteria	c__ABY1	o__Magasanikbacterales	f__GWA2-37-8	g__JAHJCN01	s__JAHJCN01 sp018812905	d__Bacteria	992066	42.8806	1	0	0	0	0	118	0	0	0	0
GB_GCA_022446965.1	TRUE	p__Planctomycetota	c__Phycisphaerae	o__Phycisphaerales	f__SM1A02	g__JABAAC01	s__JABAAC01 sp022446965	d__Bacteria	2244470	62.8695	1	0	0	0	0	98	0	0	0	0
GB_GCA_018268105.1	TRUE	p__Bacteroidota	c__Bacteroidia	o__Chitinophagales	f__Chitinophagaceae	g__Agriterribacter	s__Agriterribacter sp018268105	d__Bacteria	5096414	39.6657	1	0	0	0	0	101	0	0	0	0
GB_GCA_018813025.1	FALSE	p__Patescibacteria	c__Paceibacteria	o__Paceibacterales	f__DG-74-3	g__JAHJCL01	s__JAHJCL01 sp018813025	d__Bacteria	542381	33.4927	0	0	0	0	0	0	0	0	0	0
RS_GCF_003860565.1	TRUE	p__Bacteroidota	c__Bacteroidia	o__Flavobacteriales	f__Weeksellaceae	g__Cloacibacterium	s__Cloacibacterium normanense	d__Bacteria	2759562	33.0605	1	0	0	0	0	96	0	0	0	0
GB_GCA_938041275.1	TRUE	p__Bacillota_I	c__Bacilli_A	o__Erysipelotrichales	f__Erysipelotrichaceae	g__Bulleidia	s__Bulleidia sp938041275	d__Bacteria	2167183	35.9765	1	0	0	0	0	175	0	0	0	0
GB_GCA_902471075.1	TRUE	p__Bacteroidota	c__Bacteroidia	o__Bacteroidales	f__Barnesiellaceae	g__Barnesiella	s__Barnesiella sp902471075	d__Bacteria	2665014	54.4164	1	0	0	0	0	100	0	0	0	0
RS_GCF_900114135.1	TRUE	p__Pseudomonadota	c__Alphaproteobacteria	o__Rhodobacterales	f__Rhodobacteraceae	g__Celeribacter	s__Celeribacter halophilus	d__Bacteria	3859742	58.0713	1	0	0	0	0	191	0	0	0	0
GB_GCA_000716465.1	TRUE	p__Actinomycetota	c__Actinomycetes	o__Streptomycetales	f__Streptomycetaceae	g__Streptomyces	s__Streptomyces bikiniensis	d__Bacteria	7390663	73.0722	1	0	0	0	0	231	0	0	0	0
RS_GCF_000765665.2	FALSE	p__Campylobacterota	c__Campylobacteria	o__Campylobacterales	f__Helicobacteraceae	g__Helicobacter_C	s__Helicobacter_C sp000765665	d__Bacteria	1928308	37.7091	0	0	0	0	0	0	0	0	0	0
RS_GCF_003574035.1	TRUE	p__Deinococcota	c__Deinococci	o__Deinococcales	f__Thermaceae	g__Meiothermus	s__Meiothermus hypogaeus	d__Bacteria	3684677	61.0039	1	0	0	0	0	183	0	0	0	0
RS_GCF_003626895.1	TRUE	p__Actinomycetota	c__Actinomycetes	o__Mycobacteriales	f__Mycobacteriaceae	g__Nocardia	s__Nocardia yunnanensis	d__Bacteria	7931441	68.3627	1	0	0	0	0	240	0	0	0	0
GB_GCA_021444005.1	FALSE	p__Bacillota_I	c__Bacilli_A	o__Mycoplasmatales	f__Mycoplasmoidaceae	g__Malacoplasma	s__Malacoplasma sp021444005	d__Bacteria	983880	28.4752	0	0	0	0	0	0	0	0	0	0
RS_GCF_000454725.1	FALSE	p__Chlamydiota	c__Chlamydiia	o__Chlamydiales	f__Chlamydiaceae	g__Chlamydophila	s__Chlamydophila ibidis	d__Bacteria	1146066	38.3176	0	0	0	0	0	0	0	0	0	0
GB_GCA_026390755.1	TRUE	p__Bacteroidota	c__Ignavibacteria	o__SJA-28	f__B-1AR	g__JAPLFI01	s__JAPLFI01 sp026390755	d__Bacteria	3899025	38.84	1	0	0	0	0	108	0	0	0	0
GB_GCA_016200485.1	FALSE	p__Pseudomonadota	c__Gammaproteobacteria	o__Tenderiales	f__Tenderiaceae	g__JACQEP01	s__JACQEP01 sp016200485	d__Bacteria	3063098	52.7435	0	0	0	0	0	0	0	0	0	0
GB_GCA_030856205.1	TRUE	p__Patescibacteria	c__Saccharimonadia	o__Saccharimonadales	f__JAGQNJ01	g__JALYPT01	s__JALYPT01 sp030856205	d__Bacteria	809598	42.0825	1	0	0	0	0	122	0	0	0	0
RS_GCF_000190435.1	TRUE	p__Spirochaetota	c__Spirochaetia	o__Sphaerochaetales	f__Sphaerochaetaceae	g__Sphaerochaeta	s__Sphaerochaeta globosa	d__Bacteria	3316466	48.8743	1	0	0	0	0	98	0	0	0	0
RS_GCF_001895085.1	TRUE	p__Pseudomonadota	c__Zetaproteobacteria	o__Mariprofundales	f__Mariprofundaceae	g__Mariprofundus	s__Mariprofundus micogutta	d__Bacteria	2497805	48.7556	1	0	0	0	0	185	0	0	0	0
GB_GCA_028822375.1	TRUE	p__Verrucomicrobiota	c__Verrucomicrobiae	o__Opitutales	f__Opitutaceae	g__Pelagisphaera	s__Pelagisphaera sp028822375	d__Bacteria	4556241	50.814	1	0	0	0	0	124	0	0	0	0
RS_GCF_014138625.1	TRUE	p__Pseudomonadota	c__Alphaproteobacteria	o__Rhizobiales	f__Rhizobiaceae	g__Aminobacter	s__Aminobacter ciceronei	d__Bacteria	6774758	63.0686	1	0	0	0	0	185	0	0	0	0
RS_GCF_003096695.1	FALSE	p__Bacteroidota	c__Bacteroidia	o__Bacteroidales	f__Porphyromonadaceae	g__Porphyromonas	s__Porphyromonas loveana	d__Bacteria	2275291	50.0505	0	0	0	0	0	0	0	0	0	0
RS_GCF_000421845.1	TRUE	p__Actinomycetota	c__Actinomycetes	o__Actinomycetales	f__Microbacteriaceae	g__Leucobacter	s__Leucobacter chironomi	d__Bacteria	2964712	69.9026	1	0	0	0	0	210	0	0	0	0
GB_GCA_002338335.1	TRUE	p__Bacteroidota	c__Rhodothermia	o__Balneolales	f__Balneolaceae	g__UBA8296	s__UBA8296 sp002338335	d__Bacteria	1510407	47.306	1	0	0	0	0	110	0	0	0	0
RS_GCF_002096815.1	TRUE	p__Bacillota	c__Bacilli	o__Lactobacillales	f__Streptococcaceae	g__Streptococcus	s__Streptococcus mitis_AD	d__Bacteria	1984277	40.2069	1	0	0	0	0	182	0	0	0	0
GB_GCA_025463785.1	TRUE	p__Actinomycetota	c__Actinomycetes	o__Actinomycetales	f__Microbacteriaceae	g__Galbitalea	s__Galbitalea sp025463785	d__Bacteria	3306423	63.8383	1	0	0	0	0	226	0	0	0	0
RS_GCF_027923465.1	TRUE	p__Bacillota_A	c__Clostridia	o__Lachnospirales	f__Vallitaleaceae	g__Vallitalea	s__Vallitalea longa	d__Bacteria	5707491	30.2185	1	0	0	0	0	177	0	0	0	0
RS_GCF_003797835.1	TRUE	p__Actinomycetota	c__Actinomycetes	o__Actinomycetales	f__Micrococcaceae	g__Kocuria	s__Kocuria soli	d__Bacteria	2952089	67.0163	1	0	0	0	0	226	0	0	0	0
RS_GCF_014861365.1	TRUE	p__Pseudomonadota	c__Gammaproteobacteria	o__Pseudomonadales	f__Moraxellaceae	g__Psychrobacter	s__Psychrobacter sp014861365	d__Bacteria	3361643	42.778	1	0	0	0	0	126	0	0	0	0
RS_GCF_014851815.1	TRUE	p__Pseudomonadota	c__Gammaproteobacteria	o__Xanthomonadales	f__Xanthomonadaceae	g__Pseudoxanthomonas_A	s__Pseudoxanthomonas_A sp014851815	d__Bacteria	4176775	67.0505	1	0	0	0	0	106	0	0	0	0
GB_GCA_016218085.1	TRUE	p__Bacteroidota	c__Ignavibacteria	o__SJA-28	f__B-1AR	g__FEN-1279	s__FEN-1279 sp016218085	d__Bacteria	3314905	37.4187	1	0	0	0	0	110	0	0	0	0
GB_GCA_019454765.1	TRUE	p__Deinococcota	c__Deinococci	o__Deinococcales	f__Trueperaceae	g__JAAYYF01	s__JAAYYF01 sp019454765	d__Bacteria	2912653	72.119	1	0	0	0	0	177	0	0	0	0
GB_GCA_016124755.1	TRUE	p__Bacteroidota	c__Bacteroidia	o__NS11-12g	f__UBA9320	g__WGNA01	s__WGNA01 sp016124755	d__Bacteria	4049095	41.3715	1	0	0	0	0	100	0	0	0	0
RS_GCF_024347575.1	TRUE	p__Pseudomonadota	c__Gammaproteobacteria	o__Enterobacterales	f__Vibrionaceae	g__Vibrio	s__Vibrio pelagius	d__Bacteria	4963975	44.8237	1	2	1	0	0	95	118	57	0	0
GB_GCA_938005465.1	TRUE	p__Actinomycetota	c__Coriobacteriia	o__Coriobacteriales	f__Coriobacteriaceae	g__Collinsella	s__Collinsella sp938005465	d__Bacteria	2332406	59.5019	1	0	0	0	0	194	0	0	0	0
GB_GCA_946187935.1	FALSE	p__Bacillota_A	c__Clostridia	o__Saccharofermentanales	f__Saccharofermentanaceae	g__Saccharofermentans	s__Saccharofermentans sp946187935	d__Bacteria	1947980	47.3691	0	0	0	0	0	0	0	0	0	0
RS_GCF_008065095.1	TRUE	p__Planctomycetota	c__Planctomycetia	o__Gemmatales	f__Gemmataceae	g__Gemmata	s__Gemmata obscuriglobus	d__Bacteria	8999201	67.3597	1	0	0	0	0	112	0	0	0	0
RS_GCF_000092985.1	TRUE	p__Actinomycetota	c__Actinomycetes	o__Streptosporangiales	f__Streptosporangiaceae	g__Nocardiopsis	s__Nocardiopsis dassonvillei	d__Bacteria	6543312	72.7298	1	0	0	0	0	225	0	0	0	0
RS_GCF_002355955.1	TRUE	p__Desulfobacterota	c__Desulfovibrionia	o__Desulfovibrionales	f__Desulfovibrionaceae	g__Desulfovibrio	s__Desulfovibrio trichonymphae	d__Bacteria	1410056	54.8182	1	0	0	0	0	179	0	0	0	0
GB_GCA_003989085.1	TRUE	p__Pseudomonadota	c__Gammaproteobacteria	o__Competibacterales	f__Competibacteraceae	g__RXIV01	s__RXIV01 sp003989085	d__Bacteria	3508494	57.9779	1	0	0	0	0	107	0	0	0	0
RS_GCF_004761875.1	TRUE	p__Pseudomonadota	c__Alphaproteobacteria	o__Rhodobacterales	f__Rhodobacteraceae	g__Roseovarius	s__Roseovarius aestuariivivens	d__Bacteria	3941562	62.0303	1	0	0	0	0	187	0	0	0	0
GB_GCA_023262855.1	FALSE	p__Bacteroidota	c__Bacteroidia	o__Flavobacteriales	f__Crocinitomicaceae	g__M0103	s__M0103 sp023262855	d__Bacteria	3276542	36.5494	0	0	0	0	0	0	0	0	0	0
RS_GCF_019457475.1	TRUE	p__Pseudomonadota	c__Gammaproteobacteria	o__Enterobacterales	f__Shewanellaceae	g__Shewanella	s__Shewanella acanthi	d__Bacteria	4133651	46.5758	1	2	1	0	0	95	118	58	0	0
GB_GCA_023266055.1	FALSE	p__Pseudomonadota	c__Gammaproteobacteria	o__Ga0077554	f__Ga007554	g__Ga0077554	s__Ga0077554 sp023266055	d__Bacteria	2707193	51.3772	0	0	0	0	0	0	0	0	0	0
GB_GCA_003140835.1	FALSE	p__Eremiobacterota	c__Eremiobacteria	o__Baltobacterales	f__Baltobacteraceae	g__Tumulicola	s__Tumulicola scandinaviensis	d__Bacteria	4001325	61.3096	0	0	0	0	0	0	0	0	0	0
RS_GCF_946190115.1	TRUE	p__Bacillota	c__Bacilli	o__Lactobacillales	f__Streptococcaceae	g__Streptococcus	s__Streptococcus mitis_CO	d__Bacteria	1966346	40.1796	1	0	0	0	0	182	0	0	0	0
RS_GCF_000153205.1	TRUE	p__Pseudomonadota	c__Gammaproteobacteria	o__Nitrococcales	f__Nitrococcaceae	g__Nitrococcus	s__Nitrococcus mobilis	d__Bacteria	3623681	59.9688	1	0	0	0	0	108	0	0	0	0
GB_GCA_945903545.1	TRUE	p__Verrucomicrobiota	c__Verrucomicrobiae	o__Opitutales	f__Opitutaceae	g__CAIYFD01	s__CAIYFD01 sp945903545	d__Bacteria	3083619	66.5179	2	0	0	0	0	124	0	0	0	0
RS_GCF_944390845.1	TRUE	p__Spirochaetota	c__Brachyspirae	o__Brachyspirales	f__Brachyspiraceae	g__Brachyspira	s__Brachyspira sp944390845	d__Bacteria	3426796	27.0154	1	0	0	0	0	257	0	0	0	0
RS_GCF_001042905.1	TRUE	p__Pseudomonadota	c__Gammaproteobacteria	o__Pseudomonadales	f__Pseudomonadaceae	g__Pseudomonas_E	s__Pseudomonas_E lini	d__Bacteria	6495504	58.8194	1	0	1	0	0	102	0	71	0	0
GB_GCA_002479255.1	FALSE	p__Desulfobacterota_B	c__Binatia	o__Binatales	f__Binataceae	g__Binatus	s__Binatus soli	d__Bacteria	3671360	61.3432	0	0	0	0	0	0	0	0	0	0
GB_GCA_026397135.1	FALSE	p__Patescibacteria	c__UBA1384	o__XYA2-FULL-43-10	f__1-14-0-10-43-13	g__JAPLVL01	s__JAPLVL01 sp026397135	d__Bacteria	1144552	43.151	0	0	0	0	0	0	0	0	0	0
GB_GCA_003385605.1	TRUE	p__Bacteroidota	c__Bacteroidia	o__Flavobacteriales	f__Schleiferiaceae	g__UBA10364	s__UBA10364 sp003385605	d__Bacteria	2548510	45.9656	1	0	0	0	0	97	0	0	0	0
GB_GCA_029233985.1	FALSE	p__Patescibacteria	c__Gracilibacteria	o__JAUYGZ01	f__JAUYGZ01	g__JARGOK01	s__JARGOK01 sp029233985	d__Bacteria	1658297	41.214	0	0	0	0	0	0	0	0	0	0
GB_GCA_030853195.1	TRUE	p__Bacteroidota	c__Bacteroidia	o__Chitinophagales	f__Chitinophagaceae	g__Hanamia	s__Hanamia sp030853195	d__Bacteria	4152248	36.2258	1	0	0	0	0	99	0	0	0	0
GB_GCA_015494395.1	TRUE	p__Desulfobacterota	c__Dissulfuribacteria	o__Dissulfuribacterales	f__QOAL01	g__S144-17	s__S144-17 sp015494395	d__Bacteria	3214463	47.8276	1	0	0	0	0	173	0	0	0	0
RS_GCF_001425265.1	TRUE	p__Pseudomonadota	c__Gammaproteobacteria	o__Burkholderiales	f__Burkholderiaceae	g__Pseudoduganella	s__Pseudoduganella sp001425265	d__Bacteria	7272945	65.893	1	0	0	0	0	118	0	0	0	0
RS_GCF_007859935.1	TRUE	p__Planctomycetota	c__Planctomycetia	o__Pirellulales	f__Lacipirellulaceae	g__Posidoniimonas	s__Posidoniimonas polymericola	d__Bacteria	6262701	66.5025	1	0	0	0	0	129	0	0	0	0
GB_GCA_030149435.1	TRUE	p__Chlamydiota	c__Chlamydiia	o__Chlamydiales	f__Simkaniaceae	g__JASBRR01	s__JASBRR01 sp030149435	d__Bacteria	1669687	43.5049	1	0	0	0	0	204	0	0	0	0
GB_GCA_913057165.1	TRUE	p__Deinococcota	c__Deinococci	o__Deinococcales	f__Trueperaceae	g__SLSQ01	s__SLSQ01 sp913057165	d__Bacteria	1780752	63.0693	1	0	0	0	0	175	0	0	0	0
GB_GCA_023438885.1	TRUE	p__Actinomycetota	c__Actinomycetes	o__Actinomycetales	f__Cellulomonadaceae	g__Cellulomonas	s__Cellulomonas sp023438885	d__Bacteria	2967263	72.8293	1	0	0	0	0	218	0	0	0	0
GB_GCA_028736075.1	TRUE	p__Bacteroidota	c__Bacteroidia	o__Flavobacteriales	f__Weeksellaceae	g__Epilithonimonas	s__Epilithonimonas sp028736075	d__Bacteria	4067423	37.2653	1	0	0	0	0	96	0	0	0	0
GB_GCA_900380265.1	FALSE	p__Pseudomonadota	c__Gammaproteobacteria	o__Enterobacterales	f__Enterobacteriaceae	g__Serratia_H	s__Serratia_H symbiotica_A	d__Bacteria	2436813	40.2604	0	0	0	0	0	0	0	0	0	0
GB_GCA_021413975.1	FALSE	p__Gemmatimonadota	c__Gemmatimonadetes	o__Gemmatimonadales	f__Gemmatimonadaceae	g__PNKF01	s__PNKF01 sp021413975	d__Bacteria	3081198	69.8977	0	0	0	0	0	0	0	0	0	0
RS_GCF_004799515.1	TRUE	p__Pseudomonadota	c__Alphaproteobacteria	o__Caulobacterales	f__Caulobacteraceae	g__Phenylobacterium	s__Phenylobacterium sp004799515	d__Bacteria	4699331	69.5424	1	0	0	0	0	208	0	0	0	0
GB_GCA_030610995.1	TRUE	p__Desulfobacterota	c__Desulfobacteria	o__Desulfobacterales	f__ETH-SRB1	g__Desulfaltia	s__Desulfaltia sp030610995	d__Bacteria	3023277	42.0427	1	0	0	0	0	180	0	0	0	0
RS_GCF_004565465.1	TRUE	p__Bacillota	c__Bacilli	o__Bacillales_D	f__Amphibacillaceae	g__Lentibacillus	s__Lentibacillus salicampi	d__Bacteria	3897716	42.981	1	0	0	0	0	185	0	0	0	0
GB_GCA_002427755.1	TRUE	p__Bacteroidota	c__Bacteroidia	o__Cytophagales	f__Cyclobacteriaceae	g__Roseivirga	s__Roseivirga sp002427755	d__Bacteria	4055744	39.038	1	0	0	0	0	99	0	0	0	0
GB_GCA_019637295.1	TRUE	p__Myxococcota	c__Polyangia	o__Polyangiales	f__Polyangiaceae	g__JACKEA01	s__JACKEA01 sp019637295	d__Bacteria	7651130	69.4271	1	0	0	0	0	137	0	0	0	0
RS_GCF_900103535.1	TRUE	p__Bacillota_C	c__Negativicutes	o__Veillonellales	f__Megasphaeraceae	g__Megasphaera_A	s__Megasphaera_A paucivorans	d__Bacteria	2912276	40.1981	1	0	0	0	0	174	0	0	0	0
RS_GCF_020523925.1	TRUE	p__Bacteroidota	c__Bacteroidia	o__Flavobacteriales	f__Flavobacteriaceae	g__Tamlana_B	s__Tamlana_B laminarinivorans	d__Bacteria	3621748	32.1271	1	0	0	0	0	100	0	0	0	0
GB_GCA_934130045.1	TRUE	p__Bacillota_I	c__Bacilli_A	o__RF39	f__UBA660	g__CAJLIR01	s__CAJLIR01 sp934130045	d__Bacteria	1252028	24.1681	1	0	0	0	0	176	0	0	0	0
GB_GCA_002316295.1	TRUE	p__Desulfobacterota	c__Desulfomonilia	o__UBA1062	f__UBA1062	g__UBA1062	s__UBA1062 sp002316295	d__Bacteria	3130992	58.133	1	0	0	0	0	174	0	0	0	0
RS_GCF_003612015.1	TRUE	p__Pseudomonadota	c__Gammaproteobacteria	o__Enterobacterales	f__Enterobacteriaceae	g__Pantoea	s__Pantoea piersonii	d__Bacteria	4851875	57.0693	1	1	1	0	0	95	108	55	0	0
RS_GCF_023522835.1	TRUE	p__Bacillota	c__Bacilli	o__Bacillales_D	f__Amphibacillaceae	g__Oceanobacillus	s__Oceanobacillus saliphilus	d__Bacteria	4227370	38.6136	1	0	0	0	0	186	0	0	0	0
RS_GCF_000733125.1	TRUE	p__Pseudomonadota	c__Alphaproteobacteria	o__Caulobacterales	f__Parvularculaceae	g__Parvularcula	s__Parvularcula oceani	d__Bacteria	3354504	67.4388	1	0	0	0	0	196	0	0	0	0
RS_GCF_001975785.1	TRUE	p__Bacillota	c__Bacilli	o__Bacillales_B	f__Domibacillaceae	g__Domibacillus	s__Domibacillus epiphyticus	d__Bacteria	3237069	41.5192	1	0	0	0	0	184	0	0	0	0
RS_GCF_013276625.1	TRUE	p__Bacillota	c__Bacilli	o__Lactobacillales	f__Streptococcaceae	g__Streptococcus	s__Streptococcus sp013276625	d__Bacteria	2118514	39.9873	1	0	0	0	0	182	0	0	0	0
GB_GCA_003331045.1	FALSE	p__Pseudomonadota	c__Alphaproteobacteria	o__Rhizobiales	f__Rhizobiaceae	g__Tokpelaia_A	s__Tokpelaia_A sp003331045	d__Bacteria	1532052	43.5404	0	0	0	0	0	0	0	0	0	0
GB_GCA_013824085.1	TRUE	p__Bacteroidota	c__Ignavibacteria	o__Ignavibacteriales	f__Ignavibacteriaceae	g__PNNF01	s__PNNF01 sp013824085	d__Bacteria	2654925	32.9135	1	0	0	0	0	103	0	0	0	0
GB_GCA_022571255.1	FALSE	p__Bacteroidota	c__Rhodothermia	o__Rhodothermales	f__UBA10348	g__N075bin62	s__N075bin62 sp022571255	d__Bacteria	3291313	51.9532	0	0	0	0	0	0	0	0	0	0
RS_GCF_009833965.1	TRUE	p__Pseudomonadota	c__Gammaproteobacteria	o__Burkholderiales	f__Burkholderiaceae	g__Pelistega	s__Pelistega ratti	d__Bacteria	2326689	37.2679	1	0	0	0	0	96	0	0	0	0
RS_GCF_000484535.1	TRUE	p__Cyanobacteriota	c__Cyanobacteriia	o__Gloeobacterales	f__Gloeobacteraceae	g__Gloeobacter	s__Gloeobacter kilaueensis	d__Bacteria	4724791	60.5368	1	0	0	0	0	187	0	0	0	0
RS_GCF_002119685.1	TRUE	p__Pseudomonadota	c__Gammaproteobacteria	o__Burkholderiales	f__Burkholderiaceae	g__Bordetella_C	s__Bordetella_C sp002119685	d__Bacteria	6167536	66.2444	1	0	0	0	0	108	0	0	0	0
GB_GCA_029242765.1	TRUE	p__Bacteroidota	c__Bacteroidia	o__Flavobacteriales	f__UA16	g__UBA8752	s__UBA8752 sp029242765	d__Bacteria	2224768	55.6298	1	0	0	0	0	97	0	0	0	0
RS_GCF_000735355.1	TRUE	p__Pseudomonadota	c__Gammaproteobacteria	o__Enterobacterales	f__Enterobacteriaceae	g__Buttiauxella	s__Buttiauxella agrestis	d__Bacteria	4725816	50.7827	1	1	1	0	0	95	112	55	0	0
RS_GCF_013364195.1	TRUE	p__Actinomycetota	c__Actinomycetes	o__Streptomycetales	f__Streptomycetaceae	g__Streptomyces	s__Streptomyces sp013364195	d__Bacteria	7894562	70.818	1	0	0	0	0	238	0	0	0	0
RS_GCF_026805325.1	TRUE	p__Bacillota	c__Bacilli	o__Bacillales_D	f__Amphibacillaceae	g__Natronobacillus	s__Natronobacillus azotifigens	d__Bacteria	3473691	36.7025	1	0	0	0	0	181	0	0	0	0
RS_GCF_900095745.1	TRUE	p__Actinomycetota	c__Actinomycetes	o__Actinomycetales	f__Microbacteriaceae	g__Microbacterium	s__Microbacterium oxydans_B	d__Bacteria	3989887	68.6225	1	0	0	0	0	218	0	0	0	0
RS_GCF_000367365.1	TRUE	p__Actinomycetota	c__Actinomycetes	o__Streptomycetales	f__Streptomycetaceae	g__Streptomyces	s__Streptomyces prunicolor	d__Bacteria	11760649	69.7329	1	0	0	0	0	230	0	0	0	0
RS_GCF_000949635.1	TRUE	p__Planctomycetota	c__Brocadiia	o__Brocadiales	f__Brocadiaceae	g__Brocadia	s__Brocadia sinica	d__Bacteria	4077002	42.4102	1	0	0	0	0	120	0	0	0	0
RS_GCF_000374105.1	TRUE	p__Pseudomonadota	c__Gammaproteobacteria	o__Enterobacterales	f__Kangiellaceae	g__Kangiella	s__Kangiella aquimarina	d__Bacteria	2681803	43.7157	1	0	1	0	0	95	0	60	0	0
RS_GCF_000821245.2	TRUE	p__Bacillota	c__Bacilli	o__Bacillales_D	f__Amphibacillaceae	g__Sediminibacillus	s__Sediminibacillus senegalensis	d__Bacteria	3924902	42.8382	1	0	0	0	0	190	0	0	0	0
RS_GCF_019802345.1	TRUE	p__Pseudomonadota	c__Alphaproteobacteria	o__Rhizobiales	f__Beijerinckiaceae	g__Methylosinus	s__Methylosinus sp019802345	d__Bacteria	5133925	65.8994	1	0	0	0	0	188	0	0	0	0
RS_GCF_000372825.1	TRUE	p__Pseudomonadota	c__Alphaproteobacteria	o__Rhizobiales	f__Beijerinckiaceae	g__Methylobacterium	s__Methylobacterium sp000372825	d__Bacteria	4664957	66.676	1	0	0	0	0	203	0	0	0	0
GB_GCA_951801825.1	FALSE	p__Pseudomonadota	c__Alphaproteobacteria	o__Rs-D84	f__Rs-D84	g__Enterousia	s__Enterousia sp951801825	d__Bacteria	897245	47.9901	0	0	0	0	0	0	0	0	0	0
RS_GCF_000633395.1	TRUE	p__Pseudomonadota	c__Gammaproteobacteria	o__Pseudomonadales	f__Pseudomonadaceae	g__Pseudomonas_E	s__Pseudomonas_E sp000633395	d__Bacteria	7430140	62.9327	1	0	0	0	0	101	0	0	0	0
GB_GCA_021299735.1	TRUE	p__Pseudomonadota	c__Gammaproteobacteria	o__Burkholderiales	f__Burkholderiaceae	g__Limnobacter	s__Limnobacter sp021299735	d__Bacteria	3234174	51.0451	1	0	0	0	0	109	0	0	0	0
GB_GCA_009699865.1	FALSE	p__Actinomycetota	c__Thermoleophilia	o__Solirubrobacterales	f__Solirubrobacteraceae	g__WLNJ01	s__WLNJ01 sp009699865	d__Bacteria	1697948	60.4771	0	0	0	0	0	0	0	0	0	0
RS_GCF_001423495.1	TRUE	p__Pseudomonadota	c__Gammaproteobacteria	o__Xanthomonadales	f__Xanthomonadaceae	g__Xanthomonas	s__Xanthomonas sp001423495	d__Bacteria	5169088	64.0275	1	0	0	0	0	105	0	0	0	0
RS_GCF_010692745.1	TRUE	p__Pseudomonadota	c__Alphaproteobacteria	o__Rhizobiales	f__Beijerinckiaceae	g__Methylobacterium	s__Methylobacterium sp010692745	d__Bacteria	5183439	66.5374	1	0	0	0	0	204	0	0	0	0
GB_GCA_024403115.1	TRUE	p__Bacillota_A	c__Clostridia	o__Peptostreptococcales	f__Anaerovoracaceae	g__JAKSSK01	s__JAKSSK01 sp024403115	d__Bacteria	1081448	38.1943	1	0	0	0	0	172	0	0	0	0
GB_GCA_000063505.1	TRUE	p__Cyanobacteriota	c__Cyanobacteriia	o__PCC-6307	f__Cyanobiaceae	g__Synechococcus_C	s__Synechococcus_C sp000063505	d__Bacteria	2366980	60.236	1	0	0	0	0	195	0	0	0	0
GB_GCA_026709085.1	TRUE	p__Cyanobacteriota	c__Cyanobacteriia	o__PCC-6307	f__Cyanobiaceae	g__Synechococcus_B	s__Synechococcus_B sp026709085	d__Bacteria	2367058	61.6096	1	0	0	0	0	196	0	0	0	0
GB_GCA_003566775.1	TRUE	p__Armatimonadota	c__UBA5377	o__UBA5377	f__UBA5352	g__UBA5352	s__UBA5352 sp003566775	d__Bacteria	4411474	61.8487	1	0	0	0	0	184	0	0	0	0
GB_GCA_937901335.1	TRUE	p__Bacillota_C	c__Negativicutes	o__Acidaminococcales	f__Acidaminococcaceae	g__JAHHUH01	s__JAHHUH01 sp937901335	d__Bacteria	1669144	40.9205	1	0	0	0	0	175	0	0	0	0
RS_GCF_001279525.1	TRUE	p__Actinomycetota	c__Actinomycetes	o__Mycobacteriales	f__Pseudonocardiaceae	g__Lentzea	s__Lentzea sp001279525	d__Bacteria	9869396	70.5523	1	0	0	0	0	223	0	0	0	0
GB_GCA_944367565.1	TRUE	p__Bacillota_A	c__Clostridia	o__Christensenellales	f__Borkfalkiaceae	g__UMGS775	s__UMGS775 sp944367565	d__Bacteria	1775725	50.0481	1	0	0	0	0	178	0	0	0	0
GB_GCA_021806745.1	TRUE	p__Elusimicrobiota	c__Elusimicrobia	o__UBA1565	f__UBA9628	g__GWA2-66-18	s__GWA2-66-18 sp021806745	d__Bacteria	2776616	68.8704	1	0	0	0	0	174	0	0	0	0
GB_GCA_900315755.1	TRUE	p__Bacillota_A	c__Clostridia	o__Oscillospirales	f__Ruminococcaceae	g__Ruminococcus	s__Ruminococcus sp900315755	d__Bacteria	2446058	44.8826	1	0	0	0	0	175	0	0	0	0
RS_GCF_002940205.1	TRUE	p__Pseudomonadota	c__Gammaproteobacteria	o__Xanthomonadales	f__Xanthomonadaceae	g__Xanthomonas	s__Xanthomonas arboricola_C	d__Bacteria	4935183	65.6184	1	0	0	0	0	105	0	0	0	0
RS_GCF_001675285.1	TRUE	p__Bacteroidota	c__Bacteroidia	o__Flavobacteriales	f__Weeksellaceae	g__Elizabethkingia	s__Elizabethkingia miricola	d__Bacteria	4293809	35.8234	1	0	0	0	0	96	0	0	0	0
RS_GCF_900119625.1	TRUE	p__Actinomycetota	c__Coriobacteriia	o__Coriobacteriales	f__Atopobiaceae	g__Tractidigestivibacter	s__Tractidigestivibacter sp900119625	d__Bacteria	2421020	62.6142	1	0	0	0	0	196	0	0	0	0
GB_GCA_002313635.1	FALSE	p__Fusobacteriota	c__Fusobacteriia	o__Bac17	f__UBA816	g__UBA816	s__UBA816 sp002313635	d__Bacteria	767976	33.3443	0	0	0	0	0	0	0	0	0	0
RS_GCF_013034685.1	TRUE	p__Pseudomonadota	c__Alphaproteobacteria	o__Rhodobacterales	f__Rhodobacteraceae	g__Ruegeria	s__Ruegeria lacuscaerulensis_B	d__Bacteria	4603984	58.0797	1	0	0	0	0	187	0	0	0	0
RS_GCF_001597725.1	TRUE	p__Pseudomonadota	c__Gammaproteobacteria	o__Pseudomonadales	f__Nitrincolaceae	g__Neptuniibacter	s__Neptuniibacter marinus	d__Bacteria	3454191	42.7881	2	0	1	0	0	124	0	68	0	0
GB_GCA_002317215.1	FALSE	p__Bacillota_I	c__Bacilli_A	o__RFN20	f__UBA1709	g__UBA1709	s__UBA1709 sp002317215	d__Bacteria	836904	28.3413	0	0	0	0	0	0	0	0	0	0
RS_GCF_003583365.1	TRUE	p__Bacteroidota	c__Bacteroidia	o__Cytophagales	f__Spirosomataceae	g__Fibrisoma	s__Fibrisoma montanum	d__Bacteria	7799645	53.9864	1	1	0	0	0	114	124	0	0	0
RS_GCF_006345815.1	TRUE	p__Pseudomonadota	c__Alphaproteobacteria	o__Rhizobiales	f__Rhizobiaceae	g__Ochrobactrum	s__Ochrobactrum sp006345815	d__Bacteria	4602745	55.1586	1	0	0	0	0	197	0	0	0	0
GB_GCA_017592665.1	TRUE	p__Actinomycetota	c__Actinomycetes	o__Streptosporangiales	f__Streptosporangiaceae	g__NEAU-GS5	s__NEAU-GS5 sp017592665	d__Bacteria	9965261	69.6092	1	0	0	0	0	225	0	0	0	0
GB_GCA_002773285.1	TRUE	p__Patescibacteria	c__Paceibacteria	o__UBA9973	f__UBA2100	g__UBA10103	s__UBA10103 sp002773285	d__Bacteria	759674	58.5476	1	0	0	0	0	113	0	0	0	0
GB_GCA_005809105.1	TRUE	p__Verrucomicrobiota	c__Verrucomicrobiae	o__Limisphaerales	f__UBA1100	g__SYLI01	s__SYLI01 sp005809105	d__Bacteria	2992473	64.4189	1	0	0	0	0	111	0	0	0	0
GB_GCA_028727785.1	TRUE	p__Bacillota_A	c__Clostridia	o__Peptostreptococcales	f__Anaerovoracaceae	g__Emergencia	s__Emergencia sp028727785	d__Bacteria	1929059	41.5299	1	0	0	0	0	177	0	0	0	0
GB_GCA_023957835.1	TRUE	p__Actinomycetota	c__Actinomycetes	o__Actinomycetales	f__Microbacteriaceae	g__Terrimesophilobacter	s__Terrimesophilobacter sp023957835	d__Bacteria	2074417	59.57	1	0	0	0	0	226	0	0	0	0
RS_GCF_003545885.1	TRUE	p__Spirochaetota	c__Leptospirae	o__Leptospirales	f__Leptospiraceae	g__Leptospira	s__Leptospira stimsonii	d__Bacteria	4837465	42.6439	1	0	0	0	0	95	0	0	0	0
GB_GCA_020352495.1	TRUE	p__Krumholzibacteriota	c__Krumholzibacteria	o__WVZY01	f__WVZY01	g__G020356045	s__G020356045 sp020352495	d__Bacteria	4308810	55.6606	1	0	0	0	0	177	0	0	0	0
GB_GCA_946409515.1	TRUE	p__Bacillota_I	c__Bacilli_A	o__RFN20	f__CAG-826	g__RUG14515	s__RUG14515 sp946409515	d__Bacteria	1323416	36.1879	1	0	0	0	0	182	0	0	0	0
GB_GCA_016707885.1	TRUE	p__Pseudomonadota	c__Alphaproteobacteria	o__Sphingomonadales	f__Sphingomonadaceae	g__Sphingorhabdus_B	s__Sphingorhabdus_B sp016707885	d__Bacteria	3004743	57.7806	1	0	0	0	0	191	0	0	0	0
RS_GCF_024399335.1	TRUE	p__Actinomycetota	c__Actinomycetes	o__Actinomycetales	f__Microbacteriaceae	g__Leucobacter	s__Leucobacter aridicollis_A	d__Bacteria	3604182	64.6044	1	0	0	0	0	208	0	0	0	0
RS_GCF_017161445.1	TRUE	p__Pseudomonadota	c__Gammaproteobacteria	o__Burkholderiales	f__Rhodocyclaceae	g__Niveibacterium	s__Niveibacterium microcysteis	d__Bacteria	4854389	64.1444	1	0	0	0	0	107	0	0	0	0
RS_GCF_001857965.1	TRUE	p__Bacteroidota	c__Bacteroidia	o__Flavobacteriales	f__Flavobacteriaceae	g__Flavobacterium	s__Flavobacterium commune	d__Bacteria	3851214	34.3765	1	0	0	0	0	100	0	0	0	0
RS_GCF_005981925.1	TRUE	p__Actinomycetota	c__Actinomycetes	o__Streptomycetales	f__Streptomycetaceae	g__Streptomyces	s__Streptomyces albidochromogenes	d__Bacteria	7265310	71.4674	1	0	0	0	0	248	0	0	0	0
RS_GCF_017469785.1	TRUE	p__Spirochaetota	c__Spirochaetia	o__Treponematales	f__Treponemataceae	g__Treponema_D	s__Treponema_D sp017469785	d__Bacteria	3236427	45.0539	1	0	0	0	0	96	0	0	0	0
RS_GCF_000745015.1	TRUE	p__Pseudomonadota	c__Gammaproteobacteria	o__Burkholderiales	f__Burkholderiaceae	g__Paraburkholderia	s__Paraburkholderia sp000745015	d__Bacteria	8455632	62.7301	1	0	0	0	0	118	0	0	0	0
RS_GCF_000701465.1	TRUE	p__Actinomycetota	c__Actinomycetes	o__Actinomycetales	f__Cellulomonadaceae	g__Paraoerskovia	s__Paraoerskovia marina	d__Bacteria	2948319	70.8212	1	0	0	0	0	216	0	0	0	0
GB_GCA_028821475.1	TRUE	p__Spirochaetota	c__Spirochaetia	o__SZUA-6	f__Bin103	g__Bin103	s__Bin103 sp028821475	d__Bacteria	5730564	67.4014	1	0	0	0	0	108	0	0	0	0
GB_GCA_903878085.1	FALSE	p__Pseudomonadota	c__Alphaproteobacteria	o__Rhizobiales	f__Xanthobacteraceae	g__Pseudolabrys	s__Pseudolabrys sp903878085	d__Bacteria	4407252	62.8606	0	0	0	0	0	0	0	0	0	0
GB_GCA_938004065.1	TRUE	p__Patescibacteria	c__JAHJAL01	o__JAHJAL01	f__JAHJAL01	g__CALKWM01	s__CALKWM01 sp938004065	d__Bacteria	1276217	37.8958	1	0	0	0	0	183	0	0	0	0
GB_GCA_020555865.1	TRUE	p__Bacillota_A	c__Clostridia	o__Oscillospirales	f__Oscillospiraceae	g__Pseudoscilispira	s__Pseudoscilispira sp018369915	d__Bacteria	2201446	55.2273	1	0	0	0	0	183	0	0	0	0
RS_GCF_014287895.1	TRUE	p__Bacillota_A	c__Clostridia	o__Oscillospirales	f__Oscillospiraceae	g__Lawsonibacter_A	s__Lawsonibacter_A hominis	d__Bacteria	3499704	60.3146	1	0	0	0	0	181	0	0	0	0
GB_GCA_019309045.1	TRUE	p__Desulfobacterota	c__Syntrophobacteria	o__BM002	f__BM002	g__JAFDGZ01	s__JAFDGZ01 sp019309045	d__Bacteria	3915949	52.9771	1	0	0	0	0	180	0	0	0	0
RS_GCF_014947265.1	TRUE	p__Bacteroidota	c__Bacteroidia	o__Sphingobacteriales	f__Sphingobacteriaceae	g__Pedobacter	s__Pedobacter sp014947265	d__Bacteria	5950109	38.3972	1	0	0	0	0	115	0	0	0	0
GB_GCA_005502805.1	TRUE	p__Pseudomonadota	c__Alphaproteobacteria	o__Rhizobiales	f__Beijerinckiaceae	g__Bosea	s__Bosea sp005502805	d__Bacteria	6265038	66.514	1	0	0	0	0	195	0	0	0	0
GB_GCA_018268915.1	TRUE	p__Acidobacteriota	c__Terriglobia	o__Terriglobales	f__Acidobacteriaceae	g__Occallatibacter	s__Occallatibacter sp018268915	d__Bacteria	5908015	57.4168	1	0	0	0	0	208	0	0	0	0
GB_GCA_016783745.1	FALSE	p__Omnitrophota	c__Koll11	o__JAHIPI01	f__JAHIPI01	g__BS750m-G14	s__BS750m-G14 sp016783745	d__Bacteria	1664769	45.6453	0	0	0	0	0	0	0	0	0	0
RS_GCF_014489615.1	TRUE	p__Actinomycetota	c__Actinomycetes	o__Streptomycetales	f__Streptomycetaceae	g__Streptomyces	s__Streptomyces genisteinicus	d__Bacteria	8188347	73.4327	1	0	0	0	0	229	0	0	0	0
RS_GCF_001698225.1	TRUE	p__Actinomycetota	c__Actinomycetes	o__Mycobacteriales	f__Mycobacteriaceae	g__Gordonia	s__Gordonia terrae	d__Bacteria	5701501	67.8105	1	0	0	0	0	273	0	0	0	0
RS_GCF_013168275.1	TRUE	p__Pseudomonadota	c__Gammaproteobacteria	o__Burkholderiales	f__Gallionellaceae	g__Nitrotoga	s__Nitrotoga sp013168275	d__Bacteria	3008303	48.8553	1	0	0	0	0	109	0	0	0	0
GB_GCA_009692105.1	FALSE	p__Gemmatimonadota	c__Gemmatimonadetes	o__Longimicrobiales	f__UBA6960	g__SHZS01	s__SHZS01 sp009692105	d__Bacteria	1617159	66.381	0	0	0	0	0	0	0	0	0	0
GB_GCA_000333815.1	TRUE	p__Actinomycetota	c__Coriobacteriia	o__Coriobacteriales	f__Coriobacteriaceae	g__Enorma	s__Enorma sp000333815	d__Bacteria	2330785	65.8133	1	0	0	0	0	194	0	0	0	0
RS_GCF_011078175.1	TRUE	p__Pseudomonadota	c__Gammaproteobacteria	o__Enterobacterales	f__Enterobacteriaceae	g__Enterobacter	s__Enterobacter cloacae_Q	d__Bacteria	4482026	55.245	1	1	0	1	0	95	113	0	45	0
GB_GCA_900553125.1	TRUE	p__Bacillota_A	c__Clostridia	o__TANB77	f__CAG-508	g__CAG-269	s__CAG-269 sp900553125	d__Bacteria	1578561	27.6175	1	0	0	0	0	222	0	0	0	0
RS_GCF_014251815.1	FALSE	p__Bacteroidota	c__Bacteroidia	o__Flavobacteriales_B	f__Blattabacteriaceae	g__Blattabacterium	s__Blattabacterium cuenoti_E	d__Bacteria	624029	26.5085	0	0	0	0	0	0	0	0	0	0
RS_GCF_000444135.1	TRUE	p__Pseudomonadota	c__Gammaproteobacteria	o__Pseudomonadales	f__Pseudomonadaceae	g__Pseudomonas_E	s__Pseudomonas_E avellanae	d__Bacteria	5962738	58.5118	1	0	1	0	0	102	0	71	0	0
RS_GCF_900100125.1	TRUE	p__Bacillota	c__Bacilli	o__Lactobacillales	f__Aerococcaceae	g__Dolosicoccus	s__Dolosicoccus paucivorans	d__Bacteria	1759599	37.9087	1	0	0	0	0	185	0	0	0	0
RS_GCF_000424685.1	TRUE	p__Pseudomonadota	c__Gammaproteobacteria	o__Methylococcales	f__Methylococcaceae	g__Methylococcus	s__Methylococcus capsulatus	d__Bacteria	3266263	63.5587	1	0	0	0	0	98	0	0	0	0
GB_GCA_903845125.1	TRUE	p__Verrucomicrobiota	c__Verrucomicrobiae	o__Limisphaerales	f__CAIMWS01	g__CAIMWS01	s__CAIMWS01 sp903845125	d__Bacteria	8513692	60.9309	1	0	0	0	0	120	0	0	0	0
GB_GCA_934454405.1	TRUE	p__Bacillota_A	c__Clostridia	o__Oscillospirales	f__UBA644	g__UBA644	s__UBA644 sp934454405	d__Bacteria	1944232	49.0458	1	0	0	0	0	172	0	0	0	0
RS_GCF_000803065.1	TRUE	p__Pseudomonadota	c__Alphaproteobacteria	o__Sphingomonadales	f__Sphingomonadaceae	g__Sphingomonas	s__Sphingomonas sp000803065	d__Bacteria	5739859	63.7273	1	0	0	0	0	200	0	0	0	0
RS_GCF_004681965.1	TRUE	p__Pseudomonadota	c__Gammaproteobacteria	o__Burkholderiales	f__Burkholderiaceae	g__Ramlibacter	s__Ramlibacter rhizophilus	d__Bacteria	4590519	69.7055	1	0	0	0	0	111	0	0	0	0
GB_GCA_023247075.1	FALSE	p__Omnitrophota	c__Omnitrophia	o__Omnitrophales	f__Danuiimicrobiaceae	g__JAHFHD01	s__JAHFHD01 sp023247075	d__Bacteria	2283886	43.8814	0	0	0	0	0	0	0	0	0	0
RS_GCF_001436255.1	TRUE	p__Bacillota	c__Bacilli	o__Lactobacillales	f__Lactobacillaceae	g__Lentilactobacillus	s__Lentilactobacillus rapi	d__Bacteria	2854844	42.9481	1	0	0	0	0	186	0	0	0	0
GB_GCA_021836035.1	FALSE	p__Patescibacteria	c__Microgenomatia	o__JAMCZE01	f__JAMCZE01	g__JAKBJL01	s__JAKBJL01 sp021836035	d__Bacteria	1058246	45.7158	0	0	0	0	0	0	0	0	0	0
RS_GCF_004022705.2	TRUE	p__Pseudomonadota	c__Alphaproteobacteria	o__Rhizobiales	f__Rhizobiaceae	g__Mesorhizobium	s__Mesorhizobium sp004022705	d__Bacteria	6867388	63.1866	1	0	0	0	0	186	0	0	0	0
GB_GCA_020353215.1	TRUE	p__Desulfobacterota	c__Syntrophobacteria	o__BM002	f__BM002	g__G020353215	s__G020353215 sp020353215	d__Bacteria	4697875	51.9386	1	0	0	0	0	180	0	0	0	0
GB_GCA_021802825.1	TRUE	p__Chloroflexota	c__Limnocylindria	o__Limnocylindrales	f__CSP1-4	g__CAIXZV01	s__CAIXZV01 sp021802825	d__Bacteria	3933281	71.6398	1	0	0	0	0	196	0	0	0	0
RS_GCF_002531725.1	TRUE	p__Pseudomonadota	c__Alphaproteobacteria	o__Rhizobiales	f__Rhizobiaceae	g__Rhizobium	s__Rhizobium sp002531725	d__Bacteria	7122227	61.2247	1	0	0	0	0	191	0	0	0	0
GB_GCA_030831125.1	FALSE	p__Pseudomonadota	c__Gammaproteobacteria	o__Pseudomonadales	f__Pseudohongiellaceae	g__CAILUG01	s__CAILUG01 sp030831125	d__Bacteria	3157090	52.3085	0	0	0	0	0	0	0	0	0	0
GB_GCA_027313145.1	TRUE	p__Planctomycetota	c__Phycisphaerae	o__WQYP01	f__WQYP01	g__JAMDCX01	s__JAMDCX01 sp027313145	d__Bacteria	4432962	54.2183	1	0	0	0	0	101	0	0	0	0
RS_GCF_004331955.1	TRUE	p__Pseudomonadota	c__Alphaproteobacteria	o__Rhizobiales	f__Rhizobiaceae	g__Roseitalea	s__Roseitalea porphyridii	d__Bacteria	3539672	66.5591	1	0	0	0	0	191	0	0	0	0
RS_GCF_006742065.1	TRUE	p__Bacillota_A	c__Clostridia	o__Clostridiales	f__Clostridiaceae	g__Clostridium	s__Clostridium butyricum	d__Bacteria	4705096	28.7395	1	0	0	0	0	177	0	0	0	0
GB_GCA_003551005.1	TRUE	p__Bacillota_I	c__Bacilli_A	o__Izemoplasmatales	f__Izemoplasmataceae	g__T1SED10-81	s__T1SED10-81 sp003551005	d__Bacteria	1352745	56.3585	1	0	0	0	0	179	0	0	0	0
RS_GCF_030812255.1	TRUE	p__Actinomycetota	c__Actinomycetes	o__Actinomycetales	f__Micrococcaceae	g__Paeniglutamicibacter	s__Paeniglutamicibacter psychrophenolicus_A	d__Bacteria	4567409	66.2866	1	0	0	0	0	238	0	0	0	0
GB_GCA_947307295.1	FALSE	p__Pseudomonadota	c__Alphaproteobacteria	o__Rs-D84	f__Rs-D84	g__Enterousia	s__Enterousia sp947307295	d__Bacteria	1116116	36.0787	0	0	0	0	0	0	0	0	0	0
RS_GCF_001832885.1	TRUE	p__Bacillota	c__Bacilli	o__Lactobacillales	f__Streptococcaceae	g__Floricoccus	s__Floricoccus penangensis	d__Bacteria	2049722	33.0772	1	0	0	0	0	183	0	0	0	0
RS_GCF_002574545.1	TRUE	p__Bacillota	c__Bacilli	o__Bacillales	f__Bacillaceae_G	g__Gottfriedia	s__Gottfriedia sp002574545	d__Bacteria	4392053	33.1025	1	0	0	0	0	181	0	0	0	0
RS_GCF_001971785.1	TRUE	p__Bacteroidota	c__Bacteroidia	o__Flavobacteriales	f__Flavobacteriaceae	g__Seonamhaeicola	s__Seonamhaeicola sp001971785	d__Bacteria	3752836	32.2622	1	1	0	0	0	111	99	0	0	0
GB_GCA_023428755.1	TRUE	p__Bacteroidota	c__Bacteroidia	o__Chitinophagales	f__Chitinophagaceae	g__Lacibacter	s__Lacibacter sp023428755	d__Bacteria	4415620	41.7779	1	0	0	0	0	100	0	0	0	0
RS_GCF_000612665.1	TRUE	p__Bacillota	c__Bacilli	o__Bacillales_B	f__DSM-18226	g__Neobacillus	s__Neobacillus dielmonensis	d__Bacteria	4566707	40.9246	1	0	0	0	0	181	0	0	0	0
RS_GCF_900109285.1	TRUE	p__Pseudomonadota	c__Alphaproteobacteria	o__Rhodobacterales	f__Rhodobacteraceae	g__Jannaschia	s__Jannaschia helgolandensis	d__Bacteria	3562860	62.1773	1	0	0	0	0	189	0	0	0	0
RS_GCF_025994315.1	FALSE	p__Pseudomonadota	c__Alphaproteobacteria	o__Acetobacterales	f__Acetobacteraceae	g__Swaminathania	s__Swaminathania salitolerans	d__Bacteria	2927546	62.8432	0	0	0	0	0	0	0	0	0	0
GB_GCA_905210485.1	TRUE	p__Bacillota_A	c__Clostridia	o__Oscillospirales	f__CAG-272	g__UBA1740	s__UBA1740 sp905210485	d__Bacteria	1760149	51.2721	1	0	0	0	0	175	0	0	0	0
GB_GCA_902793635.1	TRUE	p__Bacillota_I	c__Bacilli_A	o__Erysipelotrichales	f__Erysipelotrichaceae	g__Bulleidia	s__Bulleidia sp902793635	d__Bacteria	2430201	50.2346	1	0	0	0	0	176	0	0	0	0
RS_GCF_918698005.1	TRUE	p__Actinomycetota	c__Actinomycetes	o__Actinomycetales	f__Microbacteriaceae	g__Microbacterium	s__Microbacterium sp918698005	d__Bacteria	3088809	67.7535	1	0	0	0	0	220	0	0	0	0
GB_GCA_913046365.1	TRUE	p__Bacteroidota	c__Bacteroidia	o__Flavobacteriales	f__Crocinitomicaceae	g__UBA952	s__UBA952 sp002480215	d__Bacteria	2441761	37.5339	1	0	0	0	0	95	0	0	0	0
RS_GCF_002893095.1	TRUE	p__Pseudomonadota	c__Gammaproteobacteria	o__Xanthomonadales	f__Xanthomonadaceae	g__Stenotrophomonas	s__Stenotrophomonas sp002893095	d__Bacteria	4428876	66.5601	1	0	0	0	0	107	0	0	0	0
GB_GCA_026984335.1	TRUE	p__Bacteroidota	c__Rhodothermia	o__Rhodothermales	f__ISCAR-4553	g__Rhodocaloribacter	s__Rhodocaloribacter sp026984335	d__Bacteria	4357026	65.8854	2	0	0	0	0	123	0	0	0	0
RS_GCF_012641745.1	TRUE	p__Pseudomonadota	c__Gammaproteobacteria	o__Enterobacterales	f__Alteromonadaceae	g__Pseudoalteromonas	s__Pseudoalteromonas peptidolytica	d__Bacteria	5123242	42.44	1	1	1	0	0	95	118	56	0	0
RS_GCF_017104565.1	TRUE	p__Pseudomonadota	c__Gammaproteobacteria	o__Burkholderiales	f__Burkholderiaceae	g__Paraburkholderia	s__Paraburkholderia sp017104565	d__Bacteria	8997065	62.572	2	0	0	0	0	119	0	0	0	0
RS_GCF_004358095.2	TRUE	p__Bacteroidota	c__Bacteroidia	o__Flavobacteriales	f__Flavobacteriaceae	g__Seonamhaeicola	s__Seonamhaeicola sp004358095	d__Bacteria	3537147	33.5216	1	1	0	0	0	101	101	0	0	0
RS_GCF_007655255.1	TRUE	p__Pseudomonadota	c__Gammaproteobacteria	o__Burkholderiales	f__Burkholderiaceae	g__Extensimonas	s__Extensimonas perlucida	d__Bacteria	3577201	65.4626	1	0	0	0	0	111	0	0	0	0
RS_GCF_008107725.1	TRUE	p__Pseudomonadota	c__Gammaproteobacteria	o__Pseudomonadales	f__Oleiphilaceae	g__Marinobacter	s__Marinobacter sp008107725	d__Bacteria	4214515	56.947	1	0	2	0	0	102	0	71	0	0
RS_GCF_018455725.1	TRUE	p__Actinomycetota	c__Actinomycetes	o__Mycobacteriales	f__Mycobacteriaceae	g__Mycobacterium	s__Mycobacterium acidiphilum	d__Bacteria	4545982	69.1267	1	0	0	0	0	230	0	0	0	0
RS_GCF_000012625.1	TRUE	p__Cyanobacteriota	c__Cyanobacteriia	o__PCC-6307	f__Cyanobiaceae	g__Parasynechococcus	s__Parasynechococcus sp000012625	d__Bacteria	2510659	59.2176	1	0	0	0	0	195	0	0	0	0
GB_GCA_015134355.1	FALSE	p__Pseudomonadota	c__Gammaproteobacteria	o__Enterobacterales	f__Enterobacteriaceae_A	g__Stammera	s__Stammera capleta_L	d__Bacteria	268511	15.2214	0	0	0	0	0	0	0	0	0	0
RS_GCF_011493005.1	TRUE	p__Pseudomonadota	c__Gammaproteobacteria	o__Burkholderiales	f__Burkholderiaceae	g__Caballeronia	s__Caballeronia sp011493005	d__Bacteria	8848153	59.6886	1	0	0	0	0	119	0	0	0	0
RS_GCF_004341445.1	TRUE	p__Bacillota	c__Bacilli	o__Thermoactinomycetales	f__Thermoactinomycetaceae	g__Baia	s__Baia soyae	d__Bacteria	2921910	42.0123	1	0	0	0	0	195	0	0	0	0
RS_GCF_000295955.2	TRUE	p__Pseudomonadota	c__Gammaproteobacteria	o__Enterobacterales	f__Enterobacteriaceae	g__Pantoea	s__Pantoea multigeneris	d__Bacteria	5329719	52.9168	1	1	0	0	0	95	109	0	0	0
GB_GCA_900696495.1	TRUE	p__Pseudomonadota	c__Alphaproteobacteria	o__Micavibrionales	f__Micavibrionaceae	g__UBA7657	s__UBA7657 sp900696495	d__Bacteria	2043818	55.6085	1	0	0	0	0	199	0	0	0	0
GB_GCA_947173945.1	TRUE	p__Bacillota_A	c__Clostridia	o__Lachnospirales	f__Lachnospiraceae	g__Wujia	s__Wujia sp947173945	d__Bacteria	2836510	38.3279	1	0	0	0	0	175	0	0	0	0
RS_GCF_001676875.1	TRUE	p__Pseudomonadota	c__Gammaproteobacteria	o__Burkholderiales	f__Chromobacteriaceae	g__Chromobacterium	s__Chromobacterium subtsugae	d__Bacteria	4805598	64.7819	1	0	0	0	0	108	0	0	0	0
RS_GCF_900105255.1	TRUE	p__Pseudomonadota	c__Gammaproteobacteria	o__Pseudomonadales	f__Pseudomonadaceae	g__Halopseudomonas	s__Halopseudomonas sabulinigri	d__Bacteria	4030203	59.9171	1	0	1	0	0	102	0	71	0	0
GB_GCA_900101355.1	TRUE	p__Bacillota_A	c__Clostridia	o__Oscillospirales	f__Acutalibacteraceae	g__Ruminococcus_E	s__Ruminococcus_E bromii_A	d__Bacteria	2539482	39.1433	1	0	0	0	0	176	0	0	0	0
GB_GCA_937952315.1	FALSE	p__Patescibacteria	c__Paceibacteria	o__CAIUEV01	f__CAIUEV01	g__CAIUEV01	s__CAIUEV01 sp937952315	d__Bacteria	1050145	39.535	0	0	0	0	0	0	0	0	0	0
RS_GCF_943192895.1	TRUE	p__Bacillota_C	c__Negativicutes	o__Veillonellales	f__Veillonellaceae	g__Veillonella_A	s__Veillonella_A intestinalis	d__Bacteria	2125466	38.2117	1	0	0	0	0	176	0	0	0	0
GB_GCA_903837555.1	FALSE	p__Pseudomonadota	c__Alphaproteobacteria	o__Micropepsales	f__Micropepsaceae	g__Rhizomicrobium	s__Rhizomicrobium sp903837555	d__Bacteria	2457954	63.5526	0	0	0	0	0	0	0	0	0	0
GB_GCA_902582315.1	FALSE	p__Pseudomonadota	c__Alphaproteobacteria	o__Pelagibacterales	f__Pelagibacteraceae	g__Pelagibacter	s__Pelagibacter sp902582315	d__Bacteria	1181295	29.3392	0	0	0	0	0	0	0	0	0	0
RS_GCF_003335505.1	TRUE	p__Planctomycetota	c__Planctomycetia	o__Pirellulales	f__Pirellulaceae	g__Bremerella	s__Bremerella cremea_A	d__Bacteria	6287921	54.0338	1	0	0	0	0	113	0	0	0	0
GB_GCA_020718905.1	TRUE	p__Desulfobacterota	c__Syntrophia	o__Syntrophales	f__UBA8958	g__UBA8958	s__UBA8958 sp020718905	d__Bacteria	3000180	54.115	1	0	0	0	0	179	0	0	0	0
RS_GCF_019703855.1	FALSE	p__Desulfobacterota	c__Desulfobulbia	o__Desulfobulbales	f__Desulfocapsaceae	g__Desulfomarina	s__Desulfomarina profundi	d__Bacteria	4307339	46.1287	0	0	0	0	0	0	0	0	0	0
GB_GCA_019856455.1	TRUE	p__Bacillota	c__Bacilli	o__Lactobacillales	f__Streptococcaceae	g__Streptococcus	s__Streptococcus suis_AE	d__Bacteria	2561054	41.3092	1	0	0	0	0	180	0	0	0	0
GB_GCA_016125185.1	FALSE	p__Armatimonadota	c__Fimbriimonadia	o__Fimbriimonadales	f__Fimbriimonadaceae	g__Fimbriimonas	s__Fimbriimonas sp016125185	d__Bacteria	4520756	56.99	0	0	0	0	0	0	0	0	0	0
GB_GCA_023415235.1	TRUE	p__Bacillota_A	c__Clostridia	o__Peptostreptococcales	f__Anaerovoracaceae	g__MT110	s__MT110 sp023415235	d__Bacteria	2978287	47.4734	1	0	0	0	0	176	0	0	0	0
GB_GCA_027071355.1	TRUE	p__Pseudomonadota	c__Gammaproteobacteria	o__GRL18	f__GRL18	g__JANELJ01	s__JANELJ01 sp027071355	d__Bacteria	4173155	41.6966	1	0	0	0	0	107	0	0	0	0
RS_GCF_902170305.1	TRUE	p__Pseudomonadota	c__Gammaproteobacteria	o__Enterobacterales	f__Enterobacteriaceae	g__Yersinia	s__Yersinia alsatica	d__Bacteria	5007657	47.5732	1	1	0	0	0	95	120	0	0	0
RS_GCF_024349785.1	TRUE	p__Pseudomonadota	c__Alphaproteobacteria	o__Sphingomonadales	f__Sphingomonadaceae	g__Sphingobium	s__Sphingobium bisphenolicum	d__Bacteria	5209012	64.0547	1	0	0	0	0	198	0	0	0	0
RS_GCF_003214255.1	FALSE	p__Bacteroidota	c__Bacteroidia	o__Flavobacteriales_B	f__Blattabacteriaceae	g__Sulcia	s__Sulcia muelleri	d__Bacteria	273706	22.6404	0	0	0	0	0	0	0	0	0	0
GB_GCA_031268845.1	TRUE	p__Bacillota	c__Bacilli	o__Lactobacillales	f__Streptococcaceae	g__JAIRLR01	s__JAIRLR01 sp031268845	d__Bacteria	1225287	34.3098	1	0	0	0	0	201	0	0	0	0
RS_GCF_004802635.2	TRUE	p__Pseudomonadota	c__Alphaproteobacteria	o__Rhizobiales	f__Beijerinckiaceae	g__Methylocystis	s__Methylocystis heyeri	d__Bacteria	4727788	63.0216	1	0	0	0	0	188	0	0	0	0
GB_GCA_024279865.1	TRUE	p__Planctomycetota	c__Phycisphaerae	o__Phycisphaerales	f__Phycisphaeraceae	g__JAJRRC01	s__JAJRRC01 sp024279865	d__Bacteria	3422653	51.071	1	0	0	0	0	100	0	0	0	0
RS_GCF_000959945.1	TRUE	p__Bacillota	c__Bacilli	o__Lactobacillales	f__Streptococcaceae	g__Streptococcus	s__Streptococcus oralis_B	d__Bacteria	1900154	41.2119	1	0	0	0	0	182	0	0	0	0
GB_GCA_001818495.1	TRUE	p__Patescibacteria	c__ABY1	o__UBA1558	f__GWA2-36-10	g__XYD1-37-29	s__XYD1-37-29 sp001818495	d__Bacteria	899340	36.6813	1	0	0	0	0	120	0	0	0	0
GB_GCA_947498935.1	TRUE	p__Bacteroidota	c__Bacteroidia	o__Flavobacteriales	f__Flavobacteriaceae	g__Aquimarina	s__Aquimarina sp947498935	d__Bacteria	4766086	36.7091	1	0	0	0	0	100	0	0	0	0
RS_GCF_014652615.1	TRUE	p__Pseudomonadota	c__Alphaproteobacteria	o__Sphingomonadales	f__Sphingomonadaceae	g__Novosphingobium	s__Novosphingobium arvoryzae	d__Bacteria	3285341	65.3598	1	0	0	0	0	188	0	0	0	0
RS_GCF_900101445.1	TRUE	p__Bacillota	c__Bacilli	o__Lactobacillales	f__Streptococcaceae	g__Streptococcus	s__Streptococcus equinus_B	d__Bacteria	1962621	37.8879	1	0	0	0	0	182	0	0	0	0
RS_GCF_014638845.1	TRUE	p__Bacteroidota	c__Bacteroidia	o__Cytophagales	f__Hymenobacteraceae	g__Pontibacter	s__Pontibacter amylolyticus	d__Bacteria	4588841	51.7886	1	0	0	0	0	99	0	0	0	0
RS_GCF_002104675.1	TRUE	p__Actinomycetota	c__Actinomycetes	o__Mycobacteriales	f__Mycobacteriaceae	g__Mycobacterium	s__Mycobacterium decipiens	d__Bacteria	5225940	65.5178	1	0	0	0	0	228	0	0	0	0
RS_GCF_900094835.1	TRUE	p__Bacillota	c__Bacilli	o__Lactobacillales	f__Lactobacillaceae	g__Weissella	s__Weissella bombi	d__Bacteria	1820901	36.8525	1	0	0	0	0	186	0	0	0	0
RS_GCF_000378105.1	TRUE	p__Verrucomicrobiota	c__Verrucomicrobiae	o__Verrucomicrobiales	f__Akkermansiaceae	g__Rubritalea	s__Rubritalea marina	d__Bacteria	3013271	51.5604	1	0	0	0	0	194	0	0	0	0
RS_GCF_918814755.1	TRUE	p__Bacillota	c__Bacilli	o__Lactobacillales	f__Lactobacillaceae	g__Periweissella	s__Periweissella ghanensis	d__Bacteria	1988014	39.5562	1	0	0	0	0	183	0	0	0	0
RS_GCF_900100825.1	TRUE	p__Pseudomonadota	c__Alphaproteobacteria	o__Rhizobiales	f__Rhizobiaceae	g__Agrobacterium	s__Agrobacterium sp900100825	d__Bacteria	5688264	56.4898	1	0	0	0	0	191	0	0	0	0
RS_GCF_000384155.1	TRUE	p__Pseudomonadota	c__Gammaproteobacteria	o__Burkholderiales	f__Methylophilaceae	g__Methylophilus	s__Methylophilus sp000384155	d__Bacteria	2968340	50.4387	1	0	0	0	0	108	0	0	0	0
RS_GCF_016734815.1	TRUE	p__Bacteroidota	c__Bacteroidia	o__Cytophagales	f__Hymenobacteraceae	g__Hymenobacter	s__Hymenobacter rubidus	d__Bacteria	5487430	60.7167	1	0	0	0	0	99	0	0	0	0
GB_GCA_902628195.1	FALSE	p__Pseudomonadota	c__Alphaproteobacteria	o__Pelagibacterales	f__Pelagibacteraceae	g__Pelagibacter	s__Pelagibacter sp902628195	d__Bacteria	1024646	28.4764	0	0	0	0	0	0	0	0	0	0
RS_GCF_000422245.1	TRUE	p__Desulfobacterota	c__Desulfovibrionia	o__Desulfovibrionales	f__Desulfovibrionaceae	g__Desulfohalovibrio	s__Desulfohalovibrio alkalitolerans	d__Bacteria	3202328	64.4817	1	0	0	0	0	181	0	0	0	0
RS_GCF_007097145.1	TRUE	p__Bacteroidota	c__Bacteroidia	o__Flavobacteriales	f__Flavobacteriaceae	g__Flavobacterium	s__Flavobacterium zepuense	d__Bacteria	4757687	41.3536	1	0	0	0	0	100	0	0	0	0
GB_GCA_000722615.1	TRUE	p__Pseudomonadota	c__Alphaproteobacteria	o__Rhizobiales	f__Rhizobiaceae	g__Neorhizobium	s__Neorhizobium pelagicum	d__Bacteria	5134606	62.8198	1	0	0	0	0	191	0	0	0	0
RS_GCF_025056915.1	TRUE	p__Deinococcota	c__Deinococci	o__Deinococcales	f__Thermaceae	g__Meiothermus	s__Meiothermus sp025056915	d__Bacteria	3023423	63.4835	1	0	0	0	0	183	0	0	0	0
GB_GCA_030648795.1	FALSE	p__Patescibacteria	c__ABY1	o__JACQSD01	f__JACQSD01	g__JAUSHC01	s__JAUSHC01 sp030648795	d__Bacteria	1109047	47.2548	0	0	0	0	0	0	0	0	0	0
GB_GCA_023485845.1	FALSE	p__Patescibacteria	c__Microgenomatia	o__JAMCZE01	f__JAMCZE01	g__JAMCZE01	s__JAMCZE01 sp023485845	d__Bacteria	883160	46.8783	0	0	0	0	0	0	0	0	0	0
GB_GCA_007376265.1	TRUE	p__Patescibacteria	c__Paceibacteria	o__UBA6257	f__2-01-FULL-56-20	g__VMFW01	s__VMFW01 sp007376265	d__Bacteria	912976	46.1641	1	0	0	0	0	111	0	0	0	0
GB_GCA_021787935.1	TRUE	p__Chloroflexota	c__Dehalococcoidia	o__SZUA-161	f__SZUA-161	g__JACWAE01	s__JACWAE01 sp021787935	d__Bacteria	2683694	51.1781	1	0	0	0	0	185	0	0	0	0
GB_GCA_016290325.1	TRUE	p__Bacteroidota	c__Bacteroidia	o__Bacteroidales	f__Muribaculaceae	g__Sodaliphilus	s__Sodaliphilus sp016290325	d__Bacteria	2933318	50.6515	1	0	0	0	0	97	0	0	0	0
RS_GCF_008642335.1	TRUE	p__Actinomycetota	c__Actinomycetes	o__Streptomycetales	f__Streptomycetaceae	g__Streptomyces	s__Streptomyces venezuelae_F	d__Bacteria	8048154	71.3488	1	0	0	0	0	230	0	0	0	0
GB_GCA_021324815.1	TRUE	p__Pseudomonadota	c__Gammaproteobacteria	o__JAJPIJ01	f__JAJPIJ01	g__JAJPIJ01	s__JAJPIJ01 sp021324815	d__Bacteria	2371682	64.4336	1	0	0	0	0	103	0	0	0	0
RS_GCF_007991615.1	TRUE	p__Pseudomonadota	c__Alphaproteobacteria	o__Sphingomonadales	f__Sphingomonadaceae	g__Novosphingobium	s__Novosphingobium sediminis	d__Bacteria	4577994	64.691	1	0	0	0	0	188	0	0	0	0
GB_GCA_900541715.1	TRUE	p__Actinomycetota	c__Coriobacteriia	o__Coriobacteriales	f__Coriobacteriaceae	g__Collinsella	s__Collinsella sp900541715	d__Bacteria	1990751	59.9295	1	0	0	0	0	194	0	0	0	0
GB_GCA_919901745.1	TRUE	p__Chloroflexota	c__Limnocylindria	o__Limnocylindrales	f__CSP1-4	g__CAKKPP01	s__CAKKPP01 sp919901745	d__Bacteria	3043168	69.2626	1	0	0	0	0	196	0	0	0	0
GB_GCA_003315335.1	TRUE	p__Pseudomonadota	c__Gammaproteobacteria	o__Enterobacterales	f__Enterobacteriaceae	g__Pseudocitrobacter	s__Pseudocitrobacter faecalis	d__Bacteria	5155726	53.0161	1	1	1	0	0	95	112	55	0	0
RS_GCF_003259895.1	TRUE	p__Bacillota_F	c__Halanaerobiia	o__Halanaerobiales	f__Halanaerobiaceae	g__Halanaerobium	s__Halanaerobium saccharolyticum_A	d__Bacteria	3311460	34.7518	1	0	0	0	0	195	0	0	0	0
GB_GCA_947488655.1	TRUE	p__Bacteroidota	c__Bacteroidia	o__Flavobacteriales	f__Flavobacteriaceae	g__Psychroserpens	s__Psychroserpens sp947488655	d__Bacteria	3599606	31.9391	2	2	0	0	0	100	100	0	0	0
RS_GCF_017916515.1	TRUE	p__Actinomycetota	c__Actinomycetes	o__Actinomycetales	f__Microbacteriaceae	g__Naasia	s__Naasia sp017916515	d__Bacteria	3209299	71.6657	1	0	0	0	0	240	0	0	0	0
RS_GCF_023715785.1	TRUE	p__Bacillota	c__Bacilli	o__Bacillales_B	f__DSM-18226	g__Neobacillus	s__Neobacillus niacini_E	d__Bacteria	5696635	42.3184	1	0	0	0	0	178	0	0	0	0
RS_GCF_000812865.1	TRUE	p__Bacteroidota	c__Bacteroidia	o__Flavobacteriales	f__Weeksellaceae	g__Kaistella	s__Kaistella jeonii	d__Bacteria	3261282	34.936	1	0	0	0	0	96	0	0	0	0
RS_GCF_013200955.2	TRUE	p__Pseudomonadota	c__Gammaproteobacteria	o__Pseudomonadales	f__Pseudomonadaceae	g__Pseudomonas_E	s__Pseudomonas_E campi	d__Bacteria	4436925	63.451	1	0	2	0	0	102	0	71	0	0
RS_GCF_023218075.1	TRUE	p__Actinomycetota	c__Actinomycetes	o__Mycobacteriales	f__Mycobacteriaceae	g__Rhodococcus	s__Rhodococcus sp015865005	d__Bacteria	6934978	68.2811	1	0	0	0	0	221	0	0	0	0
RS_GCF_001507595.1	TRUE	p__Pseudomonadota	c__Alphaproteobacteria	o__Rhodobacterales	f__Rhodobacteraceae	g__Ruegeria	s__Ruegeria marisrubri	d__Bacteria	4012034	62.9443	1	0	0	0	0	187	0	0	0	0
RS_GCF_003364335.1	FALSE	p__Campylobacterota	c__Campylobacteria	o__Campylobacterales	f__Helicobacteraceae	g__Helicobacter_H	s__Helicobacter_H anseris	d__Bacteria	1623876	32.1005	0	0	0	0	0	0	0	0	0	0
RS_GCF_013378445.1	TRUE	p__Pseudomonadota	c__Alphaproteobacteria	o__Rhizobiales	f__Rhizobiaceae	g__Mycoplana	s__Mycoplana rhizolycopersici	d__Bacteria	5605128	63.0834	1	0	0	0	0	191	0	0	0	0
RS_GCF_030316825.1	TRUE	p__Pseudomonadota	c__Gammaproteobacteria	o__Burkholderiales	f__Burkholderiaceae	g__Variovorax	s__Variovorax sp030316825	d__Bacteria	5808035	66.3066	1	0	0	0	0	109	0	0	0	0
RS_GCF_003143775.1	FALSE	p__Bacteroidota	c__Bacteroidia	o__Flavobacteriales	f__Crocinitomicaceae	g__Brumimicrobium	s__Brumimicrobium sp003143775	d__Bacteria	3846876	35.4901	0	0	0	0	0	0	0	0	0	0
RS_GCF_001940245.1	TRUE	p__Bacillota_A	c__Clostridia	o__Lachnospirales	f__Lachnospiraceae	g__Fimousia	s__Fimousia sp001940245	d__Bacteria	2798165	40.0741	1	0	0	0	0	176	0	0	0	0
GB_GCA_029242705.1	FALSE	p__Pseudomonadota	c__Gammaproteobacteria	o__Pseudomonadales	f__Pseudohongiellaceae	g__UBA9145	s__UBA9145 sp029242705	d__Bacteria	2458474	41.8775	0	0	0	0	0	0	0	0	0	0
RS_GCF_029625905.1	TRUE	p__Pseudomonadota	c__Gammaproteobacteria	o__Thiomicrospirales	f__Thiomicrospiraceae	g__Hydrogenovibrio	s__Hydrogenovibrio sp029625905	d__Bacteria	2437635	42.7573	1	0	0	0	0	112	0	0	0	0
GB_GCA_026396635.1	FALSE	p__Patescibacteria	c__ABY1	o__UBA1558	f__JAPLWL01	g__JAPLWL01	s__JAPLWL01 sp026396635	d__Bacteria	835981	40.4728	0	0	0	0	0	0	0	0	0	0
RS_GCF_001595725.1	TRUE	p__Bacillota	c__Bacilli	o__Bacillales	f__Bacillaceae_G	g__Bacillus_A	s__Bacillus_A thuringiensis_K	d__Bacteria	6390500	34.8357	1	0	0	0	0	180	0	0	0	0
RS_GCF_030296695.1	TRUE	p__Actinomycetota	c__Actinomycetes	o__Actinomycetales	f__Microbacteriaceae	g__Agromyces	s__Agromyces mangrovi	d__Bacteria	3613806	71.8735	1	0	0	0	0	235	0	0	0	0
GB_GCA_016458225.1	TRUE	p__Myxococcota	c__Myxococcia	o__Myxococcales	f__Myxococcaceae	g__Citreicoccus	s__Citreicoccus sp016458225	d__Bacteria	8994968	69.5123	3	0	0	0	0	212	0	0	0	0
RS_GCF_011397115.1	TRUE	p__Bacillota	c__Bacilli	o__Lactobacillales	f__Enterococcaceae	g__Enterococcus_C	s__Enterococcus_C saigonensis	d__Bacteria	2844986	36.2745	1	0	0	0	0	184	0	0	0	0
RS_GCF_021603645.1	TRUE	p__Pseudomonadota	c__Gammaproteobacteria	o__Pseudomonadales	f__Pseudomonadaceae	g__Pseudomonas	s__Pseudomonas pseudonitroreducens	d__Bacteria	6993961	64.5029	1	0	0	0	0	102	0	0	0	0
GB_GCA_029258375.1	FALSE	p__Bacillota_A	c__Clostridia	o__Oscillospirales	f__Acutalibacteraceae	g__Eubacterium_R	s__Eubacterium_R sp029258375	d__Bacteria	1715580	32.3107	0	0	0	0	0	0	0	0	0	0
RS_GCF_902729445.1	FALSE	p__Pseudomonadota	c__Alphaproteobacteria	o__Rhodospirillales	f__Magnetospirillaceae	g__Magnetospirillum	s__Magnetospirillum sp902729445	d__Bacteria	3903923	65.4824	0	0	0	0	0	0	0	0	0	0
GB_GCA_944381095.1	TRUE	p__Bacillota_A	c__Clostridia	o__Oscillospirales	f__CAG-272	g__SIG673	s__SIG673 sp944381095	d__Bacteria	2102612	44.038	1	0	0	0	0	182	0	0	0	0
GB_GCA_937900095.1	TRUE	p__Bacteroidota	c__Bacteroidia	o__Bacteroidales	f__Bacteroidaceae	g__HGM04593	s__HGM04593 sp937900095	d__Bacteria	2551520	46.9467	1	0	0	0	0	95	0	0	0	0
RS_GCF_003260205.1	TRUE	p__Bacteroidota	c__Bacteroidia	o__Flavobacteriales	f__Flavobacteriaceae	g__Winogradskyella	s__Winogradskyella tangerina	d__Bacteria	3517112	36.0912	1	1	0	0	0	102	99	0	0	0
RS_GCF_030362835.1	TRUE	p__Actinomycetota	c__Actinomycetes	o__Actinomycetales	f__Cellulomonadaceae	g__Cellulomonas	s__Cellulomonas sp030362835	d__Bacteria	3795804	74.0481	1	0	0	0	0	214	0	0	0	0
RS_GCF_000833025.1	TRUE	p__Bacteroidota	c__Bacteroidia	o__Flavobacteriales	f__Flavobacteriaceae	g__Flavobacterium	s__Flavobacterium profundi_A	d__Bacteria	4064534	33.8458	1	0	0	0	0	99	0	0	0	0
GB_GCA_031290255.1	TRUE	p__Patescibacteria	c__Saccharimonadia	o__Saccharimonadales	f__Nanosyncoccaceae	g__UBA2834	s__UBA2834 sp031290255	d__Bacteria	697830	46.8831	1	0	0	0	0	118	0	0	0	0
GB_GCA_027306885.1	FALSE	p__Chloroflexota	c__Dormibacteria	o__UBA8260	f__Bog-877	g__JAJYXT01	s__JAJYXT01 sp027306885	d__Bacteria	2257500	71.0922	0	0	0	0	0	0	0	0	0	0
GB_GCA_016714895.1	TRUE	p__Bacteroidota	c__Bacteroidia	o__Chitinophagales	f__Saprospiraceae	g__OLB9	s__OLB9 sp016714895	d__Bacteria	5007007	37.606	1	0	0	0	0	101	0	0	0	0
GB_GCA_012972825.1	TRUE	p__Bacteroidota	c__Chlorobiia	o__Chlorobiales	f__Chlorobiaceae	g__Chlorobium	s__Chlorobium sp012972825	d__Bacteria	2793755	45.6697	1	0	0	0	0	106	0	0	0	0
RS_GCF_008120935.1	TRUE	p__Actinomycetota	c__Actinomycetes	o__Streptomycetales	f__Streptomycetaceae	g__Streptomyces	s__Streptomyces sp008120935	d__Bacteria	9709490	71.8173	1	0	0	0	0	229	0	0	0	0
GB_GCA_018882785.1	TRUE	p__Pseudomonadota	c__Gammaproteobacteria	o__Burkholderiales	f__Burkholderiaceae	g__UBA954	s__UBA954 sp018882785	d__Bacteria	2168176	56.5398	1	0	0	0	0	108	0	0	0	0
RS_GCF_023242475.1	TRUE	p__Pseudomonadota	c__Gammaproteobacteria	o__Pseudomonadales	f__Pseudomonadaceae	g__Pseudomonas_E	s__Pseudomonas_E sp023242475	d__Bacteria	6082616	59.9226	1	0	0	0	0	101	0	0	0	0
GB_GCA_016875405.1	TRUE	p__Myxococcota	c__Polyangia	o__Polyangiales	f__Polyangiaceae	g__SYFR01	s__SYFR01 sp016875405	d__Bacteria	5024321	69.5182	1	0	0	0	0	115	0	0	0	0
GB_GCA_020831775.1	TRUE	p__Planctomycetota	c__Phycisphaerae	o__Phycisphaerales	f__UBA1924	g__SLFH01	s__SLFH01 sp020831775	d__Bacteria	3553943	67.4657	1	0	0	0	0	102	0	0	0	0
GB_GCA_943846735.1	TRUE	p__Bacteroidota	c__Bacteroidia	o__Flavobacteriales	f__Flavobacteriaceae	g__CAJQLB01	s__CAJQLB01 sp905479065	d__Bacteria	2705909	33.9224	2	1	0	0	0	100	99	0	0	0
RS_GCF_013523125.1	TRUE	p__Pseudomonadota	c__Gammaproteobacteria	o__Pseudomonadales	f__Pseudomonadaceae	g__Pseudomonas_E	s__Pseudomonas_E entomophila_B	d__Bacteria	4773438	64.2948	1	0	1	0	0	102	0	71	0	0
GB_GCA_002713695.1	TRUE	p__Verrucomicrobiota	c__Verrucomicrobiae	o__Opitutales	f__Opitutaceae	g__Cephaloticoccus	s__Cephaloticoccus sp002713695	d__Bacteria	3523997	55.9556	1	0	0	0	0	124	0	0	0	0
RS_GCF_020329435.1	TRUE	p__Pseudomonadota	c__Alphaproteobacteria	o__Rhizobiales	f__Xanthobacteraceae	g__Bradyrhizobium	s__Bradyrhizobium hereditatis	d__Bacteria	7871253	61.9861	1	0	0	0	0	200	0	0	0	0
RS_GCF_020329485.1	TRUE	p__Pseudomonadota	c__Alphaproteobacteria	o__Rhizobiales	f__Xanthobacteraceae	g__Bradyrhizobium	s__Bradyrhizobium cenepequi	d__Bacteria	8472857	62.3095	1	0	0	0	0	200	0	0	0	0
GB_GCA_021810245.1	FALSE	p__Elusimicrobiota	c__Elusimicrobia	o__UBA1565	f__UBA9628	g__JAKAQV01	s__JAKAQV01 sp021810245	d__Bacteria	2032490	49.3327	0	0	0	0	0	0	0	0	0	0
RS_GCF_900100655.1	TRUE	p__Pseudomonadota	c__Alphaproteobacteria	o__Kiloniellales	f__Rhodovibrionaceae	g__Limimonas	s__Limimonas halophila	d__Bacteria	3039361	69.4816	1	0	0	0	0	203	0	0	0	0
GB_GCA_012798065.1	TRUE	p__Chloroflexota	c__Anaerolineae	o__Anaerolineales	f__Anaerolineaceae	g__UBA6107	s__UBA6107 sp012798065	d__Bacteria	2179166	52.1177	1	0	0	0	0	186	0	0	0	0
RS_GCF_938045205.1	TRUE	p__Campylobacterota	c__Campylobacteria	o__Campylobacterales	f__Campylobacteraceae	g__Campylobacter_B	s__Campylobacter_B sp938045205	d__Bacteria	2170516	46.9834	1	0	0	0	0	180	0	0	0	0
RS_GCF_016428585.1	TRUE	p__Pseudomonadota	c__Alphaproteobacteria	o__Rhodobacterales	f__Rhodobacteraceae	g__Arenibacterium_A	s__Arenibacterium_A arenosum	d__Bacteria	3979826	64.1651	1	0	0	0	0	187	0	0	0	0
RS_GCF_014235185.1	TRUE	p__Actinomycetota	c__Actinomycetes	o__Mycobacteriales	f__Pseudonocardiaceae	g__Pseudonocardia	s__Pseudonocardia petroleophila	d__Bacteria	6490139	74.0439	1	0	0	0	0	224	0	0	0	0
RS_GCF_013306565.1	FALSE	p__Pseudomonadota	c__Alphaproteobacteria	o__Rhizobiales	f__Hyphomicrobiaceae	g__Hyphomicrobium_A	s__Hyphomicrobium_A sulfonivorans	d__Bacteria	3551730	61.2317	0	0	0	0	0	0	0	0	0	0
RS_GCF_000311845.1	TRUE	p__Actinomycetota	c__Coriobacteriia	o__Coriobacteriales	f__Coriobacteriaceae	g__Enorma	s__Enorma massiliensis	d__Bacteria	2280503	61.9727	1	0	0	0	0	194	0	0	0	0
GB_GCA_026995935.1	TRUE	p__Desulfobacterota	c__Dissulfuribacteria	o__Dissulfuribacterales	f__QOAL01	g__JAADCZ01	s__JAADCZ01 sp026995935	d__Bacteria	2586999	48.7109	1	0	0	0	0	173	0	0	0	0
RS_GCF_014297285.1	TRUE	p__Bacillota_A	c__Clostridia	o__Oscillospirales	f__Oscillospiraceae	g__Dysosmobacter	s__Dysosmobacter segnis	d__Bacteria	3671022	55.515	1	0	0	0	0	181	0	0	0	0
RS_GCF_004786095.1	TRUE	p__Actinomycetota	c__Actinomycetes	o__Actinomycetales	f__Beutenbergiaceae	g__Litorihabitans	s__Litorihabitans arcticus	d__Bacteria	3436981	72.9776	1	0	0	0	0	217	0	0	0	0
RS_GCF_021568905.1	TRUE	p__Pseudomonadota	c__Alphaproteobacteria	o__Zavarziniales	f__Zavarziniaceae	g__Zavarzinia	s__Zavarzinia marina	d__Bacteria	3954847	67.6946	1	0	0	0	0	196	0	0	0	0
RS_GCF_002778325.1	TRUE	p__Pseudomonadota	c__Gammaproteobacteria	o__Burkholderiales	f__Burkholderiaceae	g__Limnohabitans	s__Limnohabitans sp002778325	d__Bacteria	3399993	56.545	1	0	0	0	0	109	0	0	0	0
GB_GCA_003576905.1	TRUE	p__Planctomycetota	c__Phycisphaerae	o__UBA1845	f__UTPLA1	g__UTPLA1	s__UTPLA1 sp003576905	d__Bacteria	4711417	63.7603	2	0	0	0	0	128	0	0	0	0
GB_GCA_017577895.1	TRUE	p__Bacillota	c__Bacilli	o__ZCTH02-B2	f__ZCTH02-B2	g__Bacillus_BB	s__Bacillus_BB sp001884825	d__Bacteria	1966362	56.3531	1	0	0	0	0	183	0	0	0	0
GB_GCA_020349965.1	TRUE	p__WOR-3	c__WOR-3	o__SM23-42	f__SM23-42	g__SM23-42	s__SM23-42 sp020349965	d__Bacteria	2297784	49.2889	0	1	0	0	0	0	105	0	0	0
GB_GCA_016718315.1	TRUE	p__Cyanobacteriota	c__Vampirovibrionia	o__Obscuribacterales	f__Obscuribacteraceae	g__Obscuribacter	s__Obscuribacter sp016718315	d__Bacteria	6089269	48.5949	1	0	0	0	0	194	0	0	0	0
GB_GCA_016206155.1	FALSE	p__Patescibacteria	c__ABY1	o__JACQRZ01	f__JACQRZ01	g__JACQSC01	s__JACQSC01 sp016206155	d__Bacteria	913686	48.4361	0	0	0	0	0	0	0	0	0	0
RS_GCF_001429025.1	TRUE	p__Pseudomonadota	c__Alphaproteobacteria	o__Caulobacterales	f__Caulobacteraceae	g__Phenylobacterium	s__Phenylobacterium sp001429025	d__Bacteria	4578346	67.4197	1	0	0	0	0	212	0	0	0	0
GB_GCA_027627685.1	TRUE	p__Pseudomonadota	c__Alphaproteobacteria	o__Caulobacterales	f__Maricaulaceae	g__Oceanicaulis	s__Oceanicaulis sp027627685	d__Bacteria	3038461	66.5325	1	0	0	0	0	220	0	0	0	0
RS_GCF_029027965.1	TRUE	p__Pseudomonadota	c__Alphaproteobacteria	o__Rhodobacterales	f__Rhodobacteraceae	g__Paracoccus	s__Paracoccus sp029027965	d__Bacteria	3221824	67.1856	1	0	0	0	0	191	0	0	0	0
GB_GCA_030247525.1	FALSE	p__Electryoneota	c__JAOADG01	o__JAOADG01	f__JAOADG01	g__JAOTSC01	s__JAOTSC01 sp030247525	d__Bacteria	3589251	48.5296	0	0	0	0	0	0	0	0	0	0
GB_GCA_002409625.1	TRUE	p__Chloroflexota	c__Anaerolineae	o__Anaerolineales	f__Anaerolineaceae	g__T78	s__T78 sp002409625	d__Bacteria	2110190	46.7179	1	0	0	0	0	187	0	0	0	0
RS_GCF_000599985.1	TRUE	p__Pseudomonadota	c__Gammaproteobacteria	o__Enterobacterales	f__Enterobacteriaceae	g__Gilliamella	s__Gilliamella apicola	d__Bacteria	3139412	33.6173	0	1	0	0	0	0	110	0	0	0
RS_GCF_009834925.2	TRUE	p__Actinomycetota	c__Coriobacteriia	o__Coriobacteriales	f__Eggerthellaceae	g__Eggerthella	s__Eggerthella guodeyinii	d__Bacteria	4175177	66.16	1	0	0	0	0	191	0	0	0	0
RS_GCF_019048845.1	TRUE	p__Pseudomonadota	c__Gammaproteobacteria	o__Enterobacterales	f__Vibrionaceae	g__Vibrio	s__Vibrio sp000176715	d__Bacteria	4347065	46.351	1	1	1	0	0	95	108	57	0	0
RS_GCF_017161115.1	TRUE	p__Pseudomonadota	c__Gammaproteobacteria	o__Burkholderiales	f__Burkholderiaceae	g__Variovorax	s__Variovorax sp017161115	d__Bacteria	7168845	66.6933	1	0	0	0	0	109	0	0	0	0
GB_GCA_903885195.1	TRUE	p__Pseudomonadota	c__Gammaproteobacteria	o__Steroidobacterales	f__Steroidobacteraceae	g__UBA964	s__UBA964 sp903885195	d__Bacteria	2723067	64.1617	1	0	0	0	0	105	0	0	0	0
RS_GCF_021044825.1	TRUE	p__Pseudomonadota	c__Gammaproteobacteria	o__Burkholderiales	f__Burkholderiaceae	g__Telluria	s__Telluria phyllostachyos	d__Bacteria	5807960	66.3699	1	0	0	0	0	118	0	0	0	0
RS_GCF_000153325.1	TRUE	p__Pseudomonadota	c__Gammaproteobacteria	o__Enterobacterales	f__Vibrionaceae	g__Photobacterium	s__Photobacterium sp000153325	d__Bacteria	4992772	39.5625	1	2	1	0	0	95	122	57	0	0
RS_GCF_005869845.1	TRUE	p__Bacteroidota	c__Rhodothermia	o__Balneolales	f__Balneolaceae	g__Fodinibius	s__Fodinibius saliphilus	d__Bacteria	3606883	40.8429	1	0	0	0	0	99	0	0	0	0
RS_GCF_004360145.1	TRUE	p__Pseudomonadota	c__Alphaproteobacteria	o__Rhodobacterales	f__Rhodobacteraceae	g__Aliiroseovarius	s__Aliiroseovarius marinus	d__Bacteria	3133413	59.9007	1	0	0	0	0	192	0	0	0	0
RS_GCF_002532075.1	TRUE	p__Chloroflexota	c__Chloroflexia	o__Chloroflexales	f__Chloroflexaceae	g__Chloroploca	s__Chloroploca asiatica	d__Bacteria	5841167	58.8291	1	0	0	0	0	193	0	0	0	0
GB_GCA_023229765.1	TRUE	p__Desulfobacterota	c__Syntrophia	o__Syntrophales	f__UBA5619	g__DYTH01	s__DYTH01 sp023229765	d__Bacteria	3989567	52.5404	1	0	0	0	0	179	0	0	0	0
GB_GCA_030054115.1	FALSE	p__Pseudomonadota	c__Alphaproteobacteria	o__JASGGL01	f__JASGCL01	g__JASGCL01	s__JASGCL01 sp030054115	d__Bacteria	1679970	48.9315	0	0	0	0	0	0	0	0	0	0
GB_GCA_005791875.1	TRUE	p__Verrucomicrobiota	c__Verrucomicrobiae	o__Limisphaerales	f__SXTU01	g__SXTU01	s__SXTU01 sp005791875	d__Bacteria	4715673	64.8788	1	0	0	0	0	115	0	0	0	0
GB_GCA_020432045.1	FALSE	p__Chloroflexota	c__Dehalococcoidia	o__Tepidiformales	f__Tepidiformaceae	g__JAGQHB01	s__JAGQHB01 sp020432045	d__Bacteria	3482834	64.374	0	0	0	0	0	0	0	0	0	0
GB_GCA_016869045.1	TRUE	p__Armatimonadota	c__UBA5377	o__UBA5377	f__VGFC01	g__VGFC01	s__VGFC01 sp016869045	d__Bacteria	7870969	68.0393	1	0	0	0	0	186	0	0	0	0
GB_GCA_021199255.1	TRUE	p__Bacillota_A	c__Clostridia	o__Lachnospirales	f__Lachnospiraceae	g__UBA3282	s__UBA3282 sp021199255	d__Bacteria	3083785	48.031	1	0	0	0	0	200	0	0	0	0
GB_GCA_963204835.1	TRUE	p__Pseudomonadota	c__Gammaproteobacteria	o__Steroidobacterales	f__Steroidobacteraceae	g__CADEFQ01	s__CADEFQ01 sp963204835	d__Bacteria	2900676	69.2272	1	0	0	0	0	106	0	0	0	0
GB_GCA_027295775.1	FALSE	p__Myxococcota_A	c__UBA9160	o__UBA9160	f__JAPUKG01	g__JAPUKG01	s__JAPUKG01 sp027295775	d__Bacteria	3983640	70.1314	0	0	0	0	0	0	0	0	0	0
RS_GCF_016647575.1	TRUE	p__Pseudomonadota	c__Gammaproteobacteria	o__Enterobacterales	f__Enterobacteriaceae	g__Proteus	s__Proteus mirabilis_B	d__Bacteria	4141308	37.9983	1	1	1	0	0	95	111	56	0	0
RS_GCF_900087055.1	TRUE	p__Pseudomonadota	c__Gammaproteobacteria	o__Enterobacterales	f__Enterobacteriaceae	g__Plesiomonas	s__Plesiomonas shigelloides	d__Bacteria	3405979	52.0311	1	1	1	0	0	95	127	57	0	0
RS_GCF_015840915.1	TRUE	p__Cyanobacteriota	c__Cyanobacteriia	o__PCC-6307	f__Cyanobiaceae	g__CBW1002	s__CBW1002 sp015840915	d__Bacteria	3854122	64.6371	1	0	0	0	0	196	0	0	0	0
RS_GCF_011300455.1	TRUE	p__Pseudomonadota	c__Alphaproteobacteria	o__Sphingomonadales	f__Sphingomonadaceae	g__Sphingomicrobium	s__Sphingomicrobium piscis	d__Bacteria	2718035	63.2753	1	0	0	0	0	187	0	0	0	0
RS_GCF_017569925.1	TRUE	p__Pseudomonadota	c__Gammaproteobacteria	o__Enterobacterales	f__Enterobacteriaceae	g__Brenneria	s__Brenneria izadpanahii	d__Bacteria	5330697	53.667	1	1	1	0	0	95	112	55	0	0
RS_GCF_003048405.1	TRUE	p__Campylobacterota	c__Campylobacteria	o__Campylobacterales	f__Campylobacteraceae	g__Campylobacter_A	s__Campylobacter_A concisus_Q	d__Bacteria	1964632	37.4404	1	0	0	0	0	175	0	0	0	0
GB_GCA_944322885.1	TRUE	p__Cyanobacteriota	c__Vampirovibrionia	o__Gastranaerophilales	f__Gastranaerophilaceae	g__Stercorousia	s__Stercorousia sp944322885	d__Bacteria	1861228	34.8213	1	0	0	0	0	121	0	0	0	0
GB_GCA_022702935.2	TRUE	p__Bacillota_A	c__Clostridia	o__DSM-8532	f__DSM-8532	g__DTU059	s__DTU059 sp002376415	d__Bacteria	3170953	47.7119	1	0	0	0	0	176	0	0	0	0
GB_GCA_900019985.1	TRUE	p__Bacillota_G	c__SHA-98	o__UBA4971	f__UBA4971	g__UBA4971	s__UBA4971 sp900019985	d__Bacteria	1833135	49.6607	1	0	0	0	0	181	0	0	0	0
RS_GCF_000308615.1	TRUE	p__Actinomycetota	c__Actinomycetes	o__Mycobacteriales	f__Mycobacteriaceae	g__Nocardia	s__Nocardia jiangxiensis	d__Bacteria	10445918	66.7693	1	0	0	0	0	242	0	0	0	0
RS_GCF_000427295.1	TRUE	p__Bacteroidota	c__Bacteroidia	o__Cytophagales	f__Cyclobacteriaceae	g__Cyclobacterium	s__Cyclobacterium qasimii	d__Bacteria	6291928	38.7538	3	0	0	0	0	185	0	0	0	0
GB_GCA_947626955.1	TRUE	p__Bacillota_A	c__Clostridia	o__Christensenellales	f__UBA1242	g__UMGS2069	s__UMGS2069 sp947626955	d__Bacteria	1225354	43.7691	1	0	0	0	0	177	0	0	0	0
RS_GCF_000205025.1	FALSE	p__Pseudomonadota	c__Gammaproteobacteria	o__Burkholderiales	f__Burkholderiaceae	g__Parasutterella	s__Parasutterella excrementihominis	d__Bacteria	2831696	48.1439	0	0	0	0	0	0	0	0	0	0
GB_GCA_903958045.1	TRUE	p__Bacteroidota	c__Bacteroidia	o__Chitinophagales	f__Chitinophagaceae	g__Sediminibacterium	s__Sediminibacterium sp903958045	d__Bacteria	2430175	38.2197	1	0	0	0	0	99	0	0	0	0
GB_GCA_021648085.1	TRUE	p__Patescibacteria	c__ABY1	o__Magasanikbacterales	f__UBA922	g__JAKITS01	s__JAKITS01 sp021648085	d__Bacteria	984181	32.4422	1	0	0	0	0	116	0	0	0	0
RS_GCF_006516955.1	TRUE	p__Pseudomonadota	c__Alphaproteobacteria	o__Rhizobiales	f__Rhizobiaceae	g__Martelella	s__Martelella alba	d__Bacteria	4990712	58.6562	1	0	0	0	0	189	0	0	0	0
RS_GCF_002119425.1	TRUE	p__Campylobacterota_A	c__Desulfurellia	o__Desulfurellales	f__Desulfurellaceae	g__Desulfurella	s__Desulfurella amilsii	d__Bacteria	2002780	33.9822	1	0	0	0	0	165	0	0	0	0
RS_GCF_002148795.1	TRUE	p__Pseudomonadota	c__Alphaproteobacteria	o__Oceanibaculales	f__Oceanibaculaceae	g__Oceanibaculum	s__Oceanibaculum nanhaiense	d__Bacteria	3843501	65.1421	1	0	0	0	0	189	0	0	0	0
RS_GCF_003240585.1	TRUE	p__Pseudomonadota	c__Alphaproteobacteria	o__Rhizobiales	f__Rhizobiaceae	g__Rhizobium	s__Rhizobium tubonense	d__Bacteria	6540512	59.2729	1	0	0	0	0	191	0	0	0	0
RS_GCF_003480255.1	TRUE	p__Bacillota_I	c__Bacilli_A	o__Erysipelotrichales	f__Coprobacillaceae	g__Faecalibacillus	s__Faecalibacillus sp003480255	d__Bacteria	2159993	30.3573	1	0	0	0	0	177	0	0	0	0
RS_GCF_012932215.1	TRUE	p__Pseudomonadota	c__Alphaproteobacteria	o__Rhodobacterales	f__Rhodobacteraceae	g__Roseobacter	s__Roseobacter ponti	d__Bacteria	3962631	60.5418	1	0	0	0	0	189	0	0	0	0
RS_GCF_018119395.1	TRUE	p__Pseudomonadota	c__Gammaproteobacteria	o__Burkholderiales	f__Burkholderiaceae	g__Telluria	s__Telluria sp018119395	d__Bacteria	5362323	66.103	1	0	0	0	0	119	0	0	0	0
GB_GCA_031082425.1	TRUE	p__Edwardsbacteria	c__AC1	o__AC1	f__EtOH8	g__UBA2226	s__UBA2226 sp031082425	d__Bacteria	2617080	55.4195	1	0	0	0	0	106	0	0	0	0
GB_GCA_009684515.1	TRUE	p__Desulfobacterota	c__Desulfuromonadia	o__Geobacterales	f__Pseudopelobacteraceae	g__JACRCG01	s__JACRCG01 sp009684515	d__Bacteria	3671416	51.5519	1	0	0	0	0	182	0	0	0	0
RS_GCF_000379625.1	TRUE	p__Actinomycetota	c__Actinomycetes	o__Mycobacteriales	f__Pseudonocardiaceae	g__Actinomycetospora	s__Actinomycetospora chiangmaiensis	d__Bacteria	5861079	73.9905	1	0	0	0	0	224	0	0	0	0
GB_GCA_018815765.1	TRUE	p__Pseudomonadota	c__Gammaproteobacteria	o__Enterobacterales	f__Alteromonadaceae	g__Pararheinheimera	s__Pararheinheimera sp018815765	d__Bacteria	4108920	46.423	1	0	1	0	0	95	0	60	0	0
GB_GCA_018699955.1	TRUE	p__Planctomycetota	c__Planctomycetia	o__Planctomycetales	f__Planctomycetaceae	g__JABISG01	s__JABISG01 sp018699955	d__Bacteria	7100581	57.0141	1	0	0	0	0	119	0	0	0	0
GB_GCA_024234435.1	TRUE	p__Pseudomonadota	c__Gammaproteobacteria	o__Pseudomonadales	f__Porticoccaceae	g__JACKOF01	s__JACKOF01 sp024234435	d__Bacteria	3109957	49.4801	1	0	1	0	0	95	0	68	0	0
GB_GCA_027065695.1	TRUE	p__Desulfobacterota	c__Desulfuromonadia	o__Desulfuromonadales	f__BM103	g__M0040	s__M0040 sp027065695	d__Bacteria	3386556	49.9258	1	0	0	0	0	181	0	0	0	0
RS_GCF_020990385.1	TRUE	p__Pseudomonadota	c__Alphaproteobacteria	o__Rhodobacterales	f__Rhodobacteraceae	g__Paracoccus	s__Paracoccus sp000518925	d__Bacteria	4473736	68.0819	1	0	0	0	0	191	0	0	0	0
RS_GCF_024181225.1	TRUE	p__Spirochaetota	c__Spirochaetia	o__Treponematales	f__Treponemataceae	g__Treponema_B	s__Treponema_B sp024181225	d__Bacteria	2756918	37.799	1	0	0	0	0	96	0	0	0	0
RS_GCF_001720465.1	TRUE	p__Pseudomonadota	c__Alphaproteobacteria	o__Sphingomonadales	f__Sphingomonadaceae	g__Erythrobacter	s__Erythrobacter sp001720465	d__Bacteria	2979257	64.7166	1	0	0	0	0	188	0	0	0	0
RS_GCF_000719475.1	TRUE	p__Actinomycetota	c__Actinomycetes	o__Streptomycetales	f__Streptomycetaceae	g__Streptomyces	s__Streptomyces sp000719475	d__Bacteria	7063039	72.9039	1	0	0	0	0	250	0	0	0	0
RS_GCF_029889905.1	TRUE	p__Pseudomonadota	c__Gammaproteobacteria	o__Pseudomonadales	f__Halomonadaceae	g__Chromohalobacter	s__Chromohalobacter sp029889905	d__Bacteria	3660465	60.8304	1	0	1	0	0	102	0	68	0	0
RS_GCF_003324185.1	FALSE	p__Bacillota_A	c__Clostridia	o__Oscillospirales	f__Ruminococcaceae	g__Faecalibacterium	s__Faecalibacterium prausnitzii	d__Bacteria	3031166	56.4489	0	0	0	0	0	0	0	0	0	0
RS_GCF_004363805.1	TRUE	p__Pseudomonadota	c__Gammaproteobacteria	o__Burkholderiales	f__Chromobacteriaceae	g__Paludibacterium	s__Paludibacterium purpuratum	d__Bacteria	4036026	60.6727	1	0	0	0	0	106	0	0	0	0
RS_GCF_002368095.1	TRUE	p__Cyanobacteriota	c__Cyanobacteriia	o__Cyanobacteriales	f__Nostocaceae	g__Rivularia	s__Rivularia parasitica	d__Bacteria	9491741	36.856	1	0	0	0	0	218	0	0	0	0
RS_GCF_008274215.1	TRUE	p__Bacillota_A	c__Thermoanaerobacteria	o__Thermoanaerobacterales	f__UBA4877	g__Calorimonas	s__Calorimonas adulescens	d__Bacteria	2595951	40.2442	1	0	0	0	0	177	0	0	0	0
RS_GCF_024539675.1	TRUE	p__Actinomycetota	c__Actinomycetes	o__Streptomycetales	f__Streptomycetaceae	g__Streptomyces	s__Streptomyces hilarionis	d__Bacteria	9061055	72.2497	1	0	0	0	0	230	0	0	0	0
GB_GCA_903918025.1	FALSE	p__Actinomycetota	c__Acidimicrobiia	o__Acidimicrobiales	f__RAAP-2	g__CAIQEU01	s__CAIQEU01 sp903918025	d__Bacteria	2188340	57.7739	0	0	0	0	0	0	0	0	0	0
GB_GCA_934647945.1	TRUE	p__Bacillota_A	c__Clostridia	o__Oscillospirales	f__Acutalibacteraceae	g__UMGS1623	s__UMGS1623 sp934647945	d__Bacteria	2703084	58.5143	1	0	0	0	0	175	0	0	0	0
RS_GCF_026107455.2	TRUE	p__Pseudomonadota	c__Gammaproteobacteria	o__Xanthomonadales	f__Xanthomonadaceae	g__Stenotrophomonas	s__Stenotrophomonas sp026107455	d__Bacteria	3889357	69.1554	1	0	0	0	0	105	0	0	0	0
RS_GCF_009900765.1	TRUE	p__Pseudomonadota	c__Alphaproteobacteria	o__Acetobacterales	f__Acetobacteraceae	g__Rhodovarius	s__Rhodovarius lipocyclicus	d__Bacteria	4585642	69.8528	1	0	0	0	0	194	0	0	0	0
RS_GCF_008710275.1	TRUE	p__Pseudomonadota	c__Alphaproteobacteria	o__Rhodobacterales	f__Rhodobacteraceae	g__Oceanicola	s__Oceanicola aquaticus	d__Bacteria	3905125	67.7124	1	0	0	0	0	192	0	0	0	0
RS_GCF_002115745.1	TRUE	p__Pseudomonadota	c__Alphaproteobacteria	o__Rhodospirillales_A	f__Thalassospiraceae	g__Thalassospira	s__Thalassospira alkalitolerans	d__Bacteria	4788947	53.0908	1	0	0	0	0	198	0	0	0	0
GB_GCA_003151435.1	TRUE	p__Acidobacteriota	c__Terriglobia	o__Terriglobales	f__Acidobacteriaceae	g__Occallatibacter	s__Occallatibacter sp003151435	d__Bacteria	5960205	59.105	1	0	0	0	0	208	0	0	0	0
GB_GCA_030854195.1	TRUE	p__Chloroflexota	c__Ktedonobacteria	o__Ktedonobacterales	f__Ktedonobacteraceae	g__JACDAE01	s__JACDAE01 sp030854195	d__Bacteria	5054334	55.8466	1	0	0	0	0	202	0	0	0	0
GB_GCA_009379725.1	TRUE	p__Desulfobacterota_B	c__Binatia	o__UBA9968	f__UBA9968	g__WHTF01	s__WHTF01 sp009379725	d__Bacteria	4229199	54.1891	1	0	0	0	0	107	0	0	0	0
GB_GCA_016931995.1	TRUE	p__Planctomycetota	c__Planctomycetia	o__Pirellulales	f__Thermoguttaceae	g__JAFGDS01	s__JAFGDS01 sp016931995	d__Bacteria	5430075	66.0779	2	0	0	0	0	117	0	0	0	0
GB_GCA_025463135.1	TRUE	p__Acidobacteriota	c__Blastocatellia	o__Pyrinomonadales	f__Pyrinomonadaceae	g__JAOAPY01	s__JAOAPY01 sp025463135	d__Bacteria	6478997	54.7225	1	0	0	0	0	176	0	0	0	0
GB_GCA_910585055.1	TRUE	p__Bacillota_A	c__Clostridia	o__Christensenellales	f__Pumilibacteraceae	g__Anaerocaecibacter	s__Anaerocaecibacter sp910585055	d__Bacteria	1961418	48.1354	1	0	0	0	0	182	0	0	0	0
RS_GCF_000195855.1	TRUE	p__Actinomycetota	c__Actinomycetes	o__Mycobacteriales	f__Mycobacteriaceae	g__Mycobacterium	s__Mycobacterium leprae	d__Bacteria	3268203	57.7967	1	0	0	0	0	229	0	0	0	0
RS_GCF_001586215.1	TRUE	p__Actinomycetota	c__Actinomycetes	o__Mycobacteriales	f__Mycobacteriaceae	g__Corynebacterium	s__Corynebacterium simulans	d__Bacteria	2737971	59.008	1	0	0	0	0	215	0	0	0	0
GB_GCA_021768185.1	TRUE	p__Bacillota_A	c__Clostridia	o__Oscillospirales	f__Oscillospiraceae	g__Pelethomonas	s__Pelethomonas sp021768185	d__Bacteria	3378876	59.9398	1	0	0	0	0	180	0	0	0	0
GB_GCA_910575035.1	TRUE	p__Bacillota_A	c__Clostridia	o__Lachnospirales	f__Lachnospiraceae	g__Petralouisia	s__Petralouisia sp910575035	d__Bacteria	5703041	45.5902	1	0	0	0	0	175	0	0	0	0
GB_GCA_002724245.1	FALSE	p__Planctomycetota	c__Planctomycetia	o__Pirellulales	f__Pirellulaceae	g__UBA9264	s__UBA9264 sp002724245	d__Bacteria	7787459	56.5568	0	0	0	0	0	0	0	0	0	0
GB_GCA_900466475.1	TRUE	p__Pseudomonadota	c__Alphaproteobacteria	o__Rhizobiales	f__Rhizobiaceae	g__Rhizobium	s__Rhizobium sp900466475	d__Bacteria	7207630	60.1293	1	0	0	0	0	191	0	0	0	0
RS_GCF_014646655.1	TRUE	p__Bacteroidota	c__Bacteroidia	o__Flavobacteriales	f__Flavobacteriaceae	g__Yeosuana	s__Yeosuana aromativorans	d__Bacteria	3762238	35.3731	1	0	0	0	0	100	0	0	0	0
RS_GCF_000423745.1	TRUE	p__Bacillota	c__Bacilli	o__Lactobacillales	f__Streptococcaceae	g__Streptococcus	s__Streptococcus plurextorum	d__Bacteria	2103464	41.1005	1	0	0	0	0	182	0	0	0	0
RS_GCF_011761235.1	TRUE	p__Actinomycetota	c__Actinomycetes	o__Actinomycetales	f__Microbacteriaceae	g__Frigoribacterium	s__Frigoribacterium faeni_A	d__Bacteria	3199322	73.4175	1	0	0	0	0	233	0	0	0	0
RS_GCF_900101265.1	TRUE	p__Pseudomonadota	c__Gammaproteobacteria	o__Burkholderiales	f__Burkholderiaceae	g__Telluria	s__Telluria sp900101265	d__Bacteria	7515134	66.3934	1	0	0	0	0	119	0	0	0	0
RS_GCF_000423885.1	TRUE	p__Pseudomonadota	c__Gammaproteobacteria	o__Xanthomonadales	f__Xanthomonadaceae	g__Thermomonas	s__Thermomonas fusca	d__Bacteria	3151451	67.9459	1	0	0	0	0	108	0	0	0	0
RS_GCF_003259935.1	TRUE	p__Bacillota	c__Bacilli	o__Bacillales	f__Anoxybacillaceae	g__Anoxybacillus_B	s__Anoxybacillus_B vitaminiphilus	d__Bacteria	3556270	40.0568	1	0	0	0	0	182	0	0	0	0
RS_GCF_000975115.1	TRUE	p__Actinomycetota	c__Actinomycetes	o__Actinomycetales	f__Demequinaceae	g__Demequina	s__Demequina oxidasica	d__Bacteria	2623557	64.0541	1	0	0	0	0	234	0	0	0	0
GB_GCA_937120475.1	TRUE	p__Bacteroidota	c__Bacteroidia	o__Flavobacteriales	f__Schleiferiaceae	g__Owenweeksia	s__Owenweeksia sp937120475	d__Bacteria	3645549	45.7221	2	0	0	0	0	101	0	0	0	0
RS_GCF_019457905.1	TRUE	p__Bacteroidota	c__Bacteroidia	o__Flavobacteriales	f__Flavobacteriaceae	g__Flagellimonas	s__Flagellimonas abyssi	d__Bacteria	4407068	41.6789	1	2	0	0	0	100	105	0	0	0
GB_GCA_001544655.2	TRUE	p__Pseudomonadota	c__Gammaproteobacteria	o__Burkholderiales	f__Burkholderiaceae	g__Caballeronia	s__Caballeronia turbans	d__Bacteria	7352555	63.1017	2	0	0	0	0	136	0	0	0	0
RS_GCF_013377855.1	TRUE	p__Pseudomonadota	c__Gammaproteobacteria	o__Burkholderiales	f__Burkholderiaceae	g__Undibacterium	s__Undibacterium oligocarboniphilum	d__Bacteria	3674452	52.2345	1	0	0	0	0	114	0	0	0	0
RS_GCF_004011885.1	TRUE	p__Pseudomonadota	c__Gammaproteobacteria	o__Enterobacterales	f__Enterobacteriaceae	g__Serratia_G	s__Serratia_G microhaemolytica	d__Bacteria	3263170	49.3146	1	1	1	0	0	95	109	55	0	0
GB_GCA_002789015.1	FALSE	p__Patescibacteria	c__WWE3	o__2-01-FULL-39-13	f__2-01-FULL-39-13	g__GCA-002789015	s__GCA-002789015 sp002789015	d__Bacteria	750652	34.7317	0	0	0	0	0	0	0	0	0	0
GB_GCA_024763135.1	TRUE	p__Pseudomonadota	c__Gammaproteobacteria	o__UWMA-0217	f__UWMA-0217	g__JANTGD01	s__JANTGD01 sp024763135	d__Bacteria	3467088	52.4224	1	0	0	0	0	111	0	0	0	0
RS_GCF_024700055.1	TRUE	p__Pseudomonadota	c__Gammaproteobacteria	o__Burkholderiales	f__Burkholderiaceae	g__Rhizobacter	s__Rhizobacter sp024700055	d__Bacteria	5523971	67.6984	1	0	0	0	0	112	0	0	0	0
RS_GCF_013307205.1	TRUE	p__Pseudomonadota	c__Gammaproteobacteria	o__Burkholderiales	f__Burkholderiaceae	g__Polynucleobacter	s__Polynucleobacter arcticus	d__Bacteria	2090447	45.9326	1	0	0	0	0	107	0	0	0	0
GB_GCA_902629285.1	FALSE	p__Pseudomonadota	c__Alphaproteobacteria	o__Pelagibacterales	f__Pelagibacteraceae	g__Pelagibacter	s__Pelagibacter sp902629285	d__Bacteria	1309982	28.9733	0	0	0	0	0	0	0	0	0	0
GB_GCA_958295815.1	TRUE	p__Poribacteria	c__WGA-4E	o__WGA-4E	f__WGA-3G	g__WGA-3G	s__WGA-3G sp958295815	d__Bacteria	5130803	47.0312	1	0	0	0	0	185	0	0	0	0
RS_GCF_900453105.1	FALSE	p__Pseudomonadota	c__Gammaproteobacteria	o__Pseudomonadales	f__Moraxellaceae	g__Moraxella	s__Moraxella ovis	d__Bacteria	2322490	45.2045	0	0	0	0	0	0	0	0	0	0
RS_GCF_021811875.1	FALSE	p__Pseudomonadota	c__Alphaproteobacteria	o__Rickettsiales	f__Midichloriaceae	g__Bandiella	s__Bandiella numerosa_A	d__Bacteria	1066535	31.4022	0	0	0	0	0	0	0	0	0	0
RS_GCF_000687775.1	FALSE	p__Bacillota_I	c__Bacilli_A	o__Mycoplasmatales	f__Metamycoplasmataceae	g__Mycoplasmopsis	s__Mycoplasmopsis felifaucium	d__Bacteria	764934	28.1487	0	0	0	0	0	0	0	0	0	0
RS_GCF_002930155.1	FALSE	p__Bacillota_I	c__Bacilli_A	o__Mycoplasmatales	f__Mycoplasmataceae	g__Entomoplasma	s__Entomoplasma ellychniae	d__Bacteria	900037	26.2436	0	0	0	0	0	0	0	0	0	0
RS_GCF_014196055.1	TRUE	p__Pseudomonadota	c__Alphaproteobacteria	o__Sphingomonadales	f__Sphingomonadaceae	g__Novosphingobium	s__Novosphingobium hassiacum	d__Bacteria	4410114	62.7204	1	0	0	0	0	194	0	0	0	0
GB_GCA_903831865.1	TRUE	p__Actinomycetota	c__Coriobacteriia	o__Anaerosomatales	f__PALSA-660	g__PALSA-660	s__PALSA-660 sp903831865	d__Bacteria	2155199	67.7754	1	0	0	0	0	184	0	0	0	0
GB_GCA_902761625.1	TRUE	p__Bacillota_I	c__Bacilli_A	o__Erysipelotrichales	f__Erysipelotrichaceae	g__Bulleidia	s__Bulleidia sp902761625	d__Bacteria	2933633	48.4409	1	0	0	0	0	179	0	0	0	0
GB_GCA_947073545.1	TRUE	p__Bacillota_A	c__Clostridia	o__Lachnospirales	f__Lachnospiraceae	g__UBA3282	s__UBA3282 sp947073545	d__Bacteria	4367488	48.0826	1	0	0	0	0	175	0	0	0	0
RS_GCF_023336735.1	FALSE	p__Pseudomonadota	c__Gammaproteobacteria	o__Pseudomonadales	f__Moraxellaceae	g__Moraxella	s__Moraxella sp023336735	d__Bacteria	2006474	42.5089	0	0	0	0	0	0	0	0	0	0
RS_GCF_003458715.1	TRUE	p__Bacillota_I	c__Bacilli_A	o__Erysipelotrichales	f__Erysipelotrichaceae	g__Holdemanella	s__Holdemanella sp003458715	d__Bacteria	2274946	33.9724	1	0	0	0	0	177	0	0	0	0
RS_GCF_009389585.1	TRUE	p__Bacillota	c__Bacilli	o__Bacillales_D	f__Amphibacillaceae	g__Oceanobacillus	s__Oceanobacillus sp009389585	d__Bacteria	4457791	38.5564	1	0	0	0	0	184	0	0	0	0
RS_GCF_025628885.1	TRUE	p__Bacteroidota	c__Bacteroidia	o__Chitinophagales	f__Chitinophagaceae	g__Paraflavisolibacter	s__Paraflavisolibacter caeni	d__Bacteria	7014184	41.2012	2	0	0	0	0	103	0	0	0	0
RS_GCF_015999305.1	TRUE	p__Pseudomonadota	c__Alphaproteobacteria	o__Sphingomonadales	f__Sphingomonadaceae	g__Alteriqipengyuania	s__Alteriqipengyuania sp015999305	d__Bacteria	3317720	64.291	1	0	0	0	0	188	0	0	0	0
RS_GCF_009363275.1	TRUE	p__Pseudomonadota	c__Gammaproteobacteria	o__Pseudomonadales	f__Oleiphilaceae	g__Marinobacter	s__Marinobacter sp009363275	d__Bacteria	4264018	57.2802	1	0	2	0	0	100	0	70	0	0
RS_GCF_001425025.1	TRUE	p__Actinomycetota	c__Actinomycetes	o__Propionibacteriales	f__Nocardioidaceae	g__Nocardioides	s__Nocardioides sp001425025	d__Bacteria	4490190	71.8505	1	0	0	0	0	203	0	0	0	0
GB_GCA_022482495.1	TRUE	p__Spirochaetota	c__Spirochaetia	o__Sphaerochaetales	f__Sphaerochaetaceae	g__RUG023	s__RUG023 sp022482495	d__Bacteria	2250858	56.2303	1	0	0	0	0	98	0	0	0	0
GB_GCA_947501045.1	TRUE	p__Pseudomonadota	c__Gammaproteobacteria	o__Pseudomonadales	f__Moraxellaceae	g__Psychrobacter	s__Psychrobacter sp947501045	d__Bacteria	3488041	42.8308	1	0	0	0	0	125	0	0	0	0
GB_GCA_016927475.1	TRUE	p__Acidobacteriota	c__Aminicenantia	o__Aminicenantales	f__Aminicenantaceae	g__JAFGMO01	s__JAFGMO01 sp016927475	d__Bacteria	4989209	45.818	1	0	0	0	0	173	0	0	0	0
GB_GCA_030592285.1	TRUE	p__WOR-3	c__32-111	o__32-111	f__JAUVJU01	g__JAUVJU01	s__JAUVJU01 sp030592285	d__Bacteria	2141478	30.0202	1	0	0	0	0	101	0	0	0	0
GB_GCA_022846035.1	TRUE	p__Bacillota_A	c__Clostridia	o__Christensenellales	f__Christensenellaceae	g__Christensenella	s__Christensenella sp022846035	d__Bacteria	2768446	49.7849	1	0	0	0	0	176	0	0	0	0
GB_GCA_000953735.1	TRUE	p__Pseudomonadota	c__Gammaproteobacteria	o__Enterobacterales	f__Moritellaceae	g__Moritella	s__Moritella viscosa	d__Bacteria	5093989	39.4318	1	1	1	0	0	95	128	58	0	0
GB_GCA_014584605.1	TRUE	p__Bacteroidota	c__Bacteroidia	o__Flavobacteriales	f__PHOS-HE28	g__PHOS-HE28	s__PHOS-HE28 sp014584605	d__Bacteria	3735532	66.1407	1	0	0	0	0	100	0	0	0	0
RS_GCF_900169075.1	TRUE	p__Bacteroidota	c__Bacteroidia	o__Flavobacteriales	f__Weeksellaceae	g__Chryseobacterium	s__Chryseobacterium phocaeense	d__Bacteria	4864679	38.8636	1	0	0	0	0	96	0	0	0	0
GB_GCA_002340425.1	FALSE	p__Patescibacteria	c__Paceibacteria	o__Paceibacterales	f__UBA5633	g__UBA2558	s__UBA2558 sp002340425	d__Bacteria	550143	31.7462	0	0	0	0	0	0	0	0	0	0
GB_GCA_903829015.1	TRUE	p__Bacteroidota	c__Bacteroidia	o__Chitinophagales	f__Chitinophagaceae	g__Flavipsychrobacter	s__Flavipsychrobacter sp903829015	d__Bacteria	3990227	43.7032	1	0	0	0	0	100	0	0	0	0
RS_GCF_015182315.1	TRUE	p__Pseudomonadota	c__Gammaproteobacteria	o__Pseudomonadales	f__Cellvibrionaceae	g__Cellvibrio	s__Cellvibrio polysaccharolyticus	d__Bacteria	4261962	51.5642	1	0	1	0	0	96	0	74	0	0
RS_GCF_013032445.1	TRUE	p__Pseudomonadota	c__Alphaproteobacteria	o__Rhodobacterales	f__Rhodobacteraceae	g__Ruegeria	s__Ruegeria arenilitoris_F	d__Bacteria	5243664	57.3187	1	0	0	0	0	187	0	0	0	0
GB_GCA_016867635.1	TRUE	p__Acidobacteriota	c__Aminicenantia	o__Aminicenantales	f__RBG-16-66-30	g__RBG-16-66-30	s__RBG-16-66-30 sp016867635	d__Bacteria	2664845	65.6448	1	0	0	0	0	175	0	0	0	0
GB_GCA_027492935.1	TRUE	p__Armatimonadota	c__Fimbriimonadia	o__Fimbriimonadales	f__Fimbriimonadaceae	g__UphvI-Ar2	s__UphvI-Ar2 sp027492935	d__Bacteria	3112766	49.5836	1	0	0	0	0	182	0	0	0	0
GB_GCA_016205025.1	TRUE	p__Elusimicrobiota	c__Elusimicrobia	o__JACQPE01	f__JACQPE01	g__JACQJO01	s__JACQJO01 sp016205025	d__Bacteria	2301658	51.9895	1	0	0	0	0	196	0	0	0	0
GB_GCA_021628825.1	TRUE	p__Bacillota_A	c__Clostridia	o__Lachnospirales	f__Lachnospiraceae	g__Suilimivivens	s__Suilimivivens sp021628825	d__Bacteria	3378829	43.5522	1	0	0	0	0	181	0	0	0	0
GB_GCA_021299265.1	TRUE	p__Pseudomonadota	c__Alphaproteobacteria	o__Caulobacterales	f__TH1-2	g__Aquidulcibacter	s__Aquidulcibacter sp021299265	d__Bacteria	3426851	56.2177	1	0	0	0	0	200	0	0	0	0
GB_GCA_002793435.1	FALSE	p__Patescibacteria	c__UBA1384	o__GWA2-35-9	f__GWA2-35-9	g__GWA2-35-9	s__GWA2-35-9 sp002793435	d__Bacteria	590443	33.2046	0	0	0	0	0	0	0	0	0	0
GB_GCA_012838685.1	FALSE	p__Bacteroidota	c__Bacteroidia	o__Bacteroidales	f__VadinHA17	g__DUOU01	s__DUOU01 sp012838685	d__Bacteria	2186887	43.4846	0	0	0	0	0	0	0	0	0	0
GB_GCA_025408425.1	TRUE	p__Acidobacteriota	c__Terriglobia	o__Terriglobales	f__Acidobacteriaceae	g__Edaphobacter	s__Edaphobacter sp025408425	d__Bacteria	4229817	57.8857	1	0	0	0	0	211	0	0	0	0
GB_GCA_946500965.1	TRUE	p__Patescibacteria	c__Saccharimonadia	o__Saccharimonadales	f__Nanosyncoccaceae	g__Nanosyncoccus	s__Nanosyncoccus sp946500965	d__Bacteria	735042	55.3862	1	0	0	0	0	120	0	0	0	0
GB_GCA_951805225.1	TRUE	p__Bacteroidota	c__Bacteroidia	o__Flavobacteriales	f__Flavobacteriaceae	g__Flavobacterium	s__Flavobacterium sp951805225	d__Bacteria	6234830	33.1249	1	0	0	0	0	119	0	0	0	0
GB_GCA_002897995.1	TRUE	p__Pseudomonadota	c__Alphaproteobacteria	o__Rhizobiales	f__Methyloligellaceae	g__UBA2767	s__UBA2767 sp002897995	d__Bacteria	3184120	60.8943	1	0	0	0	0	194	0	0	0	0
RS_GCF_900446215.1	TRUE	p__Pseudomonadota	c__Gammaproteobacteria	o__Burkholderiales	f__Burkholderiaceae	g__Burkholderia	s__Burkholderia cenocepacia	d__Bacteria	8038740	66.882	1	0	0	0	0	119	0	0	0	0
RS_GCF_018141425.1	TRUE	p__Bacillota_A	c__Clostridia	o__Lachnospirales	f__Vallitaleaceae	g__Vallitalea	s__Vallitalea guaymasensis	d__Bacteria	5626074	31.1273	1	0	0	0	0	178	0	0	0	0
GB_GCA_026982575.1	TRUE	p__Pseudomonadota	c__Alphaproteobacteria	o__Rhodobacterales	f__Rhodobacteraceae	g__UBA3077	s__UBA3077 sp026982575	d__Bacteria	2378300	52.8599	1	0	0	0	0	190	0	0	0	0
GB_GCA_003564135.1	TRUE	p__Cloacimonadota	c__Cloacimonadia	o__Cloacimonadales	f__PWNZ01	g__PWNZ01	s__PWNZ01 sp003564135	d__Bacteria	2871949	40.3615	1	0	0	0	0	176	0	0	0	0
RS_GCF_003438995.1	TRUE	p__Bacteroidota	c__Bacteroidia	o__Bacteroidales	f__Bacteroidaceae	g__OM05-12	s__OM05-12 sp003438995	d__Bacteria	4475735	39.4963	1	0	0	0	0	99	0	0	0	0
GB_GCA_000403255.2	TRUE	p__Bacillota_A	c__Clostridia	o__Lachnospirales	f__Lachnospiraceae	g__Petralouisia	s__Petralouisia sp000403255	d__Bacteria	5083159	42.3463	1	0	0	0	0	175	0	0	0	0
RS_GCF_900100455.1	FALSE	p__Pseudomonadota	c__Alphaproteobacteria	o__Rhodospirillales	f__Rhodospirillaceae	g__Roseospirillum	s__Roseospirillum parvum	d__Bacteria	3497210	69.924	0	0	0	0	0	0	0	0	0	0
RS_GCF_000152885.1	TRUE	p__Pseudomonadota	c__Gammaproteobacteria	o__Enterobacterales	f__Alteromonadaceae	g__Idiomarina	s__Idiomarina baltica	d__Bacteria	2770272	47.2969	1	0	1	0	0	95	0	58	0	0
RS_GCF_000403785.1	TRUE	p__Bacteroidota	c__Bacteroidia	o__Flavobacteriales	f__Flavobacteriaceae	g__Gillisia	s__Gillisia sp000403785	d__Bacteria	3646721	33.8959	1	1	0	0	0	100	99	0	0	0
GB_GCA_958445065.1	TRUE	p__Actinomycetota	c__Coriobacteriia	o__Coriobacteriales	f__Coriobacteriaceae	g__Collinsella	s__Collinsella sp958445065	d__Bacteria	2464809	59.5983	1	0	0	0	0	194	0	0	0	0
GB_GCA_030012215.1	TRUE	p__Planctomycetota	c__Phycisphaerae	o__Sedimentisphaerales	f__SG8-4	g__PLanc-01	s__PLanc-01 sp030012215	d__Bacteria	5733199	62.4868	1	0	0	0	0	108	0	0	0	0
RS_GCF_023110055.1	TRUE	p__Bacillota	c__Bacilli	o__Lactobacillales	f__Streptococcaceae	g__Streptococcus	s__Streptococcus oralis_BY	d__Bacteria	1990034	41.2236	1	0	0	0	0	182	0	0	0	0
RS_GCF_000784835.1	TRUE	p__Thermotogota	c__Thermotogae	o__Thermotogales	f__Thermotogaceae	g__Thermotoga	s__Thermotoga sp000784835	d__Bacteria	1823483	45.9631	1	0	0	0	0	178	0	0	0	0
GB_GCA_001189345.1	TRUE	p__Pseudomonadota	c__Gammaproteobacteria	o__Burkholderiales	f__Burkholderiaceae	g__Caballeronia	s__Caballeronia kirkii_B	d__Bacteria	3914712	64.0012	1	0	0	0	0	119	0	0	0	0
RS_GCF_009857835.1	TRUE	p__Pseudomonadota	c__Gammaproteobacteria	o__Burkholderiales	f__Burkholderiaceae	g__Duganella	s__Duganella fentianensis	d__Bacteria	5095510	60.9262	2	0	0	0	0	121	0	0	0	0
RS_GCF_012939955.1	TRUE	p__Pseudomonadota	c__Gammaproteobacteria	o__Burkholderiales	f__Rhodocyclaceae	g__Accumulibacter	s__Accumulibacter phosphatis_G	d__Bacteria	5044133	62.2938	2	0	0	0	0	118	0	0	0	0
GB_GCA_028817795.1	TRUE	p__Pseudomonadota	c__Alphaproteobacteria	o__Micavibrionales	f__UBA2020	g__JAPPOU01	s__JAPPOU01 sp028817795	d__Bacteria	2497191	52.195	1	0	0	0	0	193	0	0	0	0
GB_GCA_018695135.1	TRUE	p__Cyanobacteriota	c__Vampirovibrionia	o__LMEP-6097	f__LMEP-6097	g__JABHOV01	s__JABHOV01 sp018695135	d__Bacteria	2048102	39.2144	1	0	0	0	0	204	0	0	0	0
RS_GCF_004331155.1	TRUE	p__Pseudomonadota	c__Gammaproteobacteria	o__Pseudomonadales	f__Moraxellaceae	g__Acinetobacter	s__Acinetobacter terrestris	d__Bacteria	3287055	40.9525	1	0	0	0	0	110	0	0	0	0
GB_GCA_018818405.1	FALSE	p__Patescibacteria	c__ABY1	o__UBA11705	f__JABHMO01	g__JAHIRY01	s__JAHIRY01 sp018818405	d__Bacteria	1059643	41.2386	0	0	0	0	0	0	0	0	0	0
RS_GCF_018406645.1	TRUE	p__Pseudomonadota	c__Gammaproteobacteria	o__Xanthomonadales	f__Xanthomonadaceae	g__Lysobacter_A	s__Lysobacter_A helvus	d__Bacteria	3270620	67.9129	1	0	0	0	0	106	0	0	0	0
RS_GCF_030297175.1	TRUE	p__Pseudomonadota	c__Gammaproteobacteria	o__Pseudomonadales	f__Oleiphilaceae	g__Marinobacter	s__Marinobacter sp030297175	d__Bacteria	3774518	57.7726	1	0	2	0	0	102	0	72	0	0
RS_GCF_002302635.1	TRUE	p__Bacteroidota	c__Bacteroidia	o__Flavobacteriales	f__Flavobacteriaceae	g__Capnocytophaga	s__Capnocytophaga stomatis	d__Bacteria	2831350	35.8685	1	0	0	0	0	96	0	0	0	0
RS_GCF_002741055.1	TRUE	p__Bacillota	c__Bacilli	o__Paenibacillales	f__Paenibacillaceae	g__Paenibacillus	s__Paenibacillus ihbetae	d__Bacteria	6593819	52.1185	1	0	0	0	0	187	0	0	0	0
GB_GCA_029210085.1	TRUE	p__Pseudomonadota	c__Gammaproteobacteria	o__Legionellales	f__Legionellaceae	g__JAALKW01	s__JAALKW01 sp029210085	d__Bacteria	1956226	40.2392	1	0	0	0	0	97	0	0	0	0
GB_GCA_021816775.1	TRUE	p__Pseudomonadota	c__Gammaproteobacteria	o__Steroidobacterales	f__Steroidobacteraceae	g__13-2-20CM-66-19	s__13-2-20CM-66-19 sp021816775	d__Bacteria	3942804	67.745	1	0	0	0	0	105	0	0	0	0
GB_GCA_001767855.1	TRUE	p__Pseudomonadota	c__Alphaproteobacteria	o__UBA7879	f__UBA5542	g__2-01-FULL-41-14	s__2-01-FULL-41-14 sp001767855	d__Bacteria	994497	44.6612	1	0	0	0	0	199	0	0	0	0
RS_GCF_004364645.1	TRUE	p__Actinomycetota	c__Actinomycetes	o__Propionibacteriales	f__Propionibacteriaceae	g__Naumannella	s__Naumannella halotolerans	d__Bacteria	3473971	67.5595	1	0	0	0	0	224	0	0	0	0
GB_GCA_900316355.1	TRUE	p__Bacteroidota	c__Bacteroidia	o__Bacteroidales	f__Bacteroidaceae	g__UBA4372	s__UBA4372 sp900316355	d__Bacteria	3158208	53.9022	1	0	0	0	0	98	0	0	0	0
RS_GCF_003664595.1	TRUE	p__Bacillota	c__Bacilli	o__Lactobacillales	f__Aerococcaceae	g__Atopobacter	s__Atopobacter sp003664595	d__Bacteria	2207974	38.5819	1	0	0	0	0	186	0	0	0	0
RS_GCF_000430885.1	TRUE	p__Bacillota_B	c__Desulfotomaculia	o__Desulfotomaculales	f__Desulfallaceae	g__Desulfallas	s__Desulfallas alcoholivorax	d__Bacteria	3471050	46.9217	1	0	0	0	0	175	0	0	0	0
GB_GCA_944387315.1	TRUE	p__Bacillota_A	c__Clostridia	o__Oscillospirales	f__Ruminococcaceae	g__CALXEL01	s__CALXEL01 sp944387315	d__Bacteria	1984604	50.8188	1	0	0	0	0	174	0	0	0	0
RS_GCF_010811875.1	TRUE	p__Pseudomonadota	c__Alphaproteobacteria	o__Rhizobiales	f__Xanthobacteraceae	g__Bradyrhizobium	s__Bradyrhizobium uaiense	d__Bacteria	9972761	63.264	1	0	0	0	0	199	0	0	0	0
RS_GCF_003944835.1	TRUE	p__Bacillota	c__Bacilli	o__Bacillales	f__HMF5848	g__HMF5848	s__HMF5848 sp003944835	d__Bacteria	4547917	37.3752	1	0	0	0	0	181	0	0	0	0
RS_GCF_024666595.1	TRUE	p__Pseudomonadota	c__Alphaproteobacteria	o__Sphingomonadales	f__Sphingomonadaceae	g__Sphingomonas	s__Sphingomonas sp024666595	d__Bacteria	3929132	65.8185	1	0	0	0	0	192	0	0	0	0
RS_GCF_002776555.1	FALSE	p__Pseudomonadota	c__Gammaproteobacteria	o__Legionellales	f__Legionellaceae	g__GCF-002776555	s__GCF-002776555 sp002776555	d__Bacteria	529746	23.0312	0	0	0	0	0	0	0	0	0	0
GB_GCA_012221805.1	TRUE	p__Pseudomonadota	c__Gammaproteobacteria	o__Enterobacterales	f__Pasteurellaceae	g__RH1A	s__RH1A sp012221805	d__Bacteria	2314446	47.9169	0	1	0	0	0	0	109	0	0	0
RS_GCF_030388325.1	TRUE	p__Bacteroidota	c__Bacteroidia	o__Flavobacteriales	f__Flavobacteriaceae	g__Flavobacterium	s__Flavobacterium johnsoniae_C	d__Bacteria	5324536	33.3727	1	0	0	0	0	100	0	0	0	0
GB_GCA_024642265.1	TRUE	p__Pseudomonadota	c__Gammaproteobacteria	o__Pseudomonadales	f__Halieaceae	g__Halioglobus	s__Halioglobus sp024642265	d__Bacteria	4199336	60.9222	1	0	1	0	0	95	0	67	0	0
RS_GCF_014207505.1	TRUE	p__Bacillota	c__Bacilli	o__Lactobacillales	f__Lactobacillaceae	g__Leuconostoc	s__Leuconostoc carnosum	d__Bacteria	1820660	36.954	1	0	0	0	0	180	0	0	0	0
RS_GCF_004363045.1	TRUE	p__Bacillota	c__Bacilli	o__DSM-28697	f__DSM-28697	g__Aureibacillus	s__Aureibacillus halotolerans	d__Bacteria	4382167	44.2958	1	0	0	0	0	188	0	0	0	0
RS_GCF_014204415.1	TRUE	p__Bacteroidota	c__Bacteroidia	o__Flavobacteriales	f__Weeksellaceae	g__Chryseobacterium	s__Chryseobacterium defluvii_A	d__Bacteria	3873134	37.4912	1	0	0	0	0	96	0	0	0	0
RS_GCF_030433645.1	TRUE	p__Actinomycetota	c__Actinomycetes	o__Actinomycetales	f__Micrococcaceae	g__Arthrobacter_D	s__Arthrobacter_D sp030433645	d__Bacteria	3949738	67.9774	1	0	0	0	0	260	0	0	0	0
GB_GCA_903945195.1	FALSE	p__Patescibacteria	c__Microgenomatia	o__UBA1400	f__UBA12108	g__CAJAUT01	s__CAJAUT01 sp903945195	d__Bacteria	1049355	41.9261	0	0	0	0	0	0	0	0	0	0
RS_GCF_000235445.1	TRUE	p__Bacillota_A	c__Clostridia	o__Lachnospirales	f__Lachnospiraceae	g__Johnsonella	s__Johnsonella ignava	d__Bacteria	2687075	35.7352	1	0	0	0	0	177	0	0	0	0
GB_GCA_937139435.1	TRUE	p__WOR-3	c__WOR-3	o__UBA2258	f__UBA2258	g__JABLXZ01	s__JABLXZ01 sp937139435	d__Bacteria	1690454	50.846	1	0	0	0	0	109	0	0	0	0
GB_GCA_934180065.1	TRUE	p__Bacillota_A	c__Clostridia	o__TANB77	f__CAG-508	g__CAG-492	s__CAG-492 sp934180065	d__Bacteria	1924587	26.9985	1	0	0	0	0	176	0	0	0	0
RS_GCF_000442555.1	TRUE	p__Bacillota	c__Bacilli	o__Paenibacillales	f__Paenibacillaceae	g__Paenibacillus_B	s__Paenibacillus_B alvei_B	d__Bacteria	6709780	46.6423	1	0	0	0	0	183	0	0	0	0
RS_GCF_000724545.1	TRUE	p__Bacteroidota	c__Bacteroidia	o__Chitinophagales	f__Saprospiraceae	g__Aureispira	s__Aureispira sp000724545	d__Bacteria	7367602	35.6888	1	0	0	0	0	98	0	0	0	0
RS_GCF_001439695.1	TRUE	p__Pseudomonadota	c__Gammaproteobacteria	o__Pseudomonadales	f__Pseudomonadaceae	g__Pseudomonas_E	s__Pseudomonas_E veronii	d__Bacteria	6997867	60.7229	1	0	0	0	0	101	0	0	0	0
RS_GCF_003119195.2	TRUE	p__Pseudomonadota	c__Alphaproteobacteria	o__Azospirillales	f__Azospirillaceae	g__Azospirillum	s__Azospirillum baldaniorum	d__Bacteria	7682393	68.4328	1	0	0	0	0	198	0	0	0	0
RS_GCF_002250565.1	TRUE	p__Actinomycetota	c__Actinomycetes	o__Propionibacteriales	f__Propionibacteriaceae	g__Parenemella	s__Parenemella sanctibonifatiensis	d__Bacteria	3052532	68.0435	1	0	0	0	0	213	0	0	0	0
RS_GCF_000341065.1	TRUE	p__Actinomycetota	c__Actinomycetes	o__Streptosporangiales	f__Streptosporangiaceae	g__Nocardiopsis	s__Nocardiopsis halotolerans	d__Bacteria	6263929	71.4068	1	0	0	0	0	222	0	0	0	0
RS_GCF_000218235.1	TRUE	p__Bacteroidota	c__Bacteroidia	o__Bacteroidales	f__Bacteroidaceae	g__Prevotella	s__Prevotella multisaccharivorax	d__Bacteria	3388644	48.306	1	0	0	0	0	100	0	0	0	0
RS_GCF_001975825.1	TRUE	p__Bacteroidota	c__Bacteroidia	o__Chitinophagales	f__Chitinophagaceae	g__Chitinophaga	s__Chitinophaga sp001975825	d__Bacteria	8630543	43.4476	2	0	0	0	0	128	0	0	0	0
GB_GCA_021155985.1	TRUE	p__Actinomycetota	c__UBA4738	o__UBA4738	f__HRBIN12	g__JAJNBA01	s__JAJNBA01 sp021155985	d__Bacteria	2671657	69.0435	1	0	0	0	0	122	0	0	0	0
RS_GCF_000379165.1	TRUE	p__Pseudomonadota	c__Gammaproteobacteria	o__Pseudomonadales	f__Cellvibrionaceae	g__Teredinibacter	s__Teredinibacter turnerae	d__Bacteria	5387817	50.8487	0	1	1	0	0	0	103	68	0	0
GB_GCA_016704465.1	FALSE	p__Gemmatimonadota	c__Gemmatimonadetes	o__Gemmatimonadales	f__Gemmatimonadaceae	g__SCN-70-22	s__SCN-70-22 sp016704465	d__Bacteria	6108737	68.2724	0	0	0	0	0	0	0	0	0	0
RS_GCF_004125825.1	TRUE	p__Bacillota_A	c__Clostridia	o__Peptostreptococcales	f__Acidaminobacteraceae	g__QQWI01	s__QQWI01 sp004125825	d__Bacteria	4111109	42.8761	1	0	0	0	0	176	0	0	0	0
GB_GCA_958295875.1	TRUE	p__Pseudomonadota	c__Gammaproteobacteria	o__Pseudomonadales	f__Azotimanducaceae_A	g__VXNE01	s__VXNE01 sp958295875	d__Bacteria	3746347	66.4142	1	0	0	0	0	100	0	0	0	0
RS_GCF_001750165.1	TRUE	p__Pseudomonadota	c__Gammaproteobacteria	o__Enterobacterales	f__Alteromonadaceae	g__Pseudoalteromonas	s__Pseudoalteromonas luteoviolacea_G	d__Bacteria	6223983	41.6592	1	1	1	0	0	95	118	56	0	0
RS_GCF_029637605.1	TRUE	p__Pseudomonadota	c__Gammaproteobacteria	o__Burkholderiales	f__Burkholderiaceae	g__Achromobacter	s__Achromobacter spanius_E	d__Bacteria	6474880	64.1422	1	0	0	0	0	112	0	0	0	0
GB_GCA_029250925.1	TRUE	p__Pseudomonadota	c__Alphaproteobacteria	o__Caulobacterales	f__Maricaulaceae	g__Hellea	s__Hellea sp029250925	d__Bacteria	1837250	38.0941	1	0	0	0	0	193	0	0	0	0
GB_GCA_000276965.1	TRUE	p__Campylobacterota	c__Campylobacteria	o__Campylobacterales	f__Thiovulaceae	g__Thiovulum_A	s__Thiovulum_A sp000276965	d__Bacteria	2080587	33.0129	1	0	0	0	0	174	0	0	0	0
RS_GCF_000559025.1	TRUE	p__Pseudomonadota	c__Gammaproteobacteria	o__Xanthomonadales	f__Xanthomonadaceae	g__Luteimonas_D	s__Luteimonas_D huabeiensis	d__Bacteria	4295921	71.6212	1	0	0	0	0	108	0	0	0	0
RS_GCF_001625695.1	TRUE	p__Pseudomonadota	c__Gammaproteobacteria	o__Enterobacterales	f__Alteromonadaceae	g__Pseudoalteromonas	s__Pseudoalteromonas luteoviolacea_B	d__Bacteria	6109792	41.9591	1	1	1	0	0	95	118	56	0	0
RS_GCF_030733205.1	TRUE	p__Pseudomonadota	c__Alphaproteobacteria	o__Rhodobacterales	f__Rhodobacteraceae	g__Mameliella	s__Mameliella sp030733205	d__Bacteria	5715530	64.4874	1	0	0	0	0	187	0	0	0	0
RS_GCF_003987315.1	TRUE	p__Pseudomonadota	c__Gammaproteobacteria	o__Enterobacterales	f__Alteromonadaceae	g__Aliidiomarina	s__Aliidiomarina haloalkalitolerans	d__Bacteria	2675932	49.2918	1	0	1	0	0	95	0	58	0	0
RS_GCF_014698065.1	TRUE	p__Cyanobacteriota	c__Cyanobacteriia	o__Cyanobacteriales	f__Nostocaceae	g__Nostoc	s__Nostoc flagelliforme_B	d__Bacteria	10844745	41.5636	1	0	0	0	0	214	0	0	0	0
RS_GCF_024436375.1	TRUE	p__Actinomycetota	c__Actinomycetes	o__Propionibacteriales	f__Nocardioidaceae	g__Nocardioides	s__Nocardioides astragali	d__Bacteria	5170090	70.5673	1	0	0	0	0	209	0	0	0	0
GB_GCA_030949705.1	TRUE	p__Pseudomonadota	c__Alphaproteobacteria	o__Caulobacterales	f__Maricaulaceae	g__Robiginitomaculum_B	s__Robiginitomaculum_B sp030949705	d__Bacteria	2834082	55.6008	1	0	0	0	0	207	0	0	0	0
GB_GCA_021325495.1	FALSE	p__Verrucomicrobiota	c__Verrucomicrobiae	o__Chthoniobacterales	f__UBA10450	g__JAJPGZ01	s__JAJPGZ01 sp021325495	d__Bacteria	2934601	56.9714	0	0	0	0	0	0	0	0	0	0
RS_GCF_002154725.1	TRUE	p__Cyanobacteriota	c__Cyanobacteriia	o__Cyanobacteriales	f__Nostocaceae	g__Aulosira	s__Aulosira sp002154725	d__Bacteria	8662725	41.2897	1	0	0	0	0	220	0	0	0	0
RS_GCF_025152745.1	TRUE	p__Pseudomonadota	c__Alphaproteobacteria	o__Rhizobiales	f__Rhizobiaceae	g__Rhizobium	s__Rhizobium leguminosarum_I	d__Bacteria	6439303	60.8165	1	0	0	0	0	191	0	0	0	0
RS_GCF_000166275.1	TRUE	p__Bacteroidota	c__Bacteroidia	o__Cytophagales	f__Cyclobacteriaceae	g__Algoriphagus	s__Algoriphagus machipongonensis	d__Bacteria	4787724	38.6939	1	0	0	0	0	101	0	0	0	0
GB_GCA_029007115.1	TRUE	p__Bacillota_I	c__Bacilli_A	o__RF39	f__UBA660	g__CAG-1000	s__CAG-1000 sp029007115	d__Bacteria	1243304	24.74	1	0	0	0	0	175	0	0	0	0
RS_GCF_000714935.1	TRUE	p__Bacillota	c__Bacilli	o__Tumebacillales	f__Tumebacillaceae	g__Tumebacillus	s__Tumebacillus flagellatus	d__Bacteria	4874793	56.5494	1	0	0	0	0	184	0	0	0	0
GB_GCA_019636195.1	TRUE	p__Planctomycetota	c__UBA8742	o__UBA2392	f__UBA2392	g__JADJRK01	s__JADJRK01 sp019636195	d__Bacteria	3925498	63.7054	1	0	0	0	0	129	0	0	0	0
RS_GCF_016909495.1	TRUE	p__Pseudomonadota	c__Gammaproteobacteria	o__Enterobacterales	f__Enterobacteriaceae	g__Erwinia	s__Erwinia coffeiphila	d__Bacteria	5740494	55.255	1	1	0	0	0	95	110	0	0	0
GB_GCA_002238555.1	TRUE	p__Chloroflexota	c__Anaerolineae	o__Caldilineales	f__Caldilineaceae	g__Bin34	s__Bin34 sp002238555	d__Bacteria	4630258	63.1474	1	0	0	0	0	187	0	0	0	0
GB_GCA_000990585.1	FALSE	p__Patescibacteria	c__Paceibacteria	o__Moranbacterales	f__UBA9337	g__UBA12151	s__UBA12151 sp000990585	d__Bacteria	923070	36.4303	0	0	0	0	0	0	0	0	0	0
RS_GCF_023155805.1	TRUE	p__Actinomycetota	c__Actinomycetes	o__Actinomycetales	f__Micrococcaceae	g__Micrococcus	s__Micrococcus sp023155805	d__Bacteria	2568106	73.0859	1	0	0	0	0	234	0	0	0	0
RS_GCF_003201475.1	FALSE	p__Pseudomonadota	c__Alphaproteobacteria	o__Rhizobiales	f__Beijerinckiaceae	g__Chelatococcus	s__Chelatococcus asaccharovorans	d__Bacteria	7254611	63.9953	0	0	0	0	0	0	0	0	0	0
GB_GCA_009839485.1	TRUE	p__Bacteroidota	c__Rhodothermia	o__Rhodothermales	f__VXPQ01	g__VXPQ01	s__VXPQ01 sp009839485	d__Bacteria	2924555	58.715	1	0	0	0	0	104	0	0	0	0
GB_GCA_009842205.1	FALSE	p__Pseudomonadota	c__Alphaproteobacteria	o__Rhodobacterales	f__Rhodobacteraceae	g__MPNP01	s__MPNP01 sp009842205	d__Bacteria	2902643	44.4693	0	0	0	0	0	0	0	0	0	0
RS_GCF_000422825.1	TRUE	p__Actinomycetota	c__Actinomycetes	o__Propionibacteriales	f__Nocardioidaceae	g__Nocardioides	s__Nocardioides insulae	d__Bacteria	4060447	70.779	1	0	0	0	0	207	0	0	0	0
GB_GCA_937918935.1	TRUE	p__Chloroflexota	c__Chloroflexia	o__Chloroflexales	f__Chloroflexaceae	g__JACAEO01	s__JACAEO01 sp937918935	d__Bacteria	4602940	65.5121	1	0	0	0	0	193	0	0	0	0
GB_GCA_902798535.1	TRUE	p__Pseudomonadota	c__Alphaproteobacteria	o__RUG11792	f__RUG11792	g__RUG11420	s__RUG11420 sp902798535	d__Bacteria	945849	37.4492	1	0	0	0	0	185	0	0	0	0
GB_GCA_919592095.1	TRUE	p__Pseudomonadota	c__Gammaproteobacteria	o__Burkholderiales	f__Burkholderiaceae	g__Ralstonia	s__Ralstonia syzygii	d__Bacteria	3987390	66.5028	1	0	0	0	0	117	0	0	0	0
RS_GCF_001998825.1	TRUE	p__Pseudomonadota	c__Gammaproteobacteria	o__Enterobacterales	f__Pasteurellaceae	g__Rodentibacter	s__Rodentibacter mrazii	d__Bacteria	2484705	39.9525	0	1	0	0	0	0	106	0	0	0
RS_GCF_015863205.1	TRUE	p__Bacillota	c__Bacilli	o__Lactobacillales	f__Aerococcaceae	g__Facklamia	s__Facklamia lactis	d__Bacteria	2213095	36.4016	1	0	0	0	0	190	0	0	0	0
RS_GCF_001655055.1	TRUE	p__Pseudomonadota	c__Gammaproteobacteria	o__Enterobacterales	f__Enterobacteriaceae	g__Providencia	s__Providencia heimbachae	d__Bacteria	4205997	40.2462	1	1	1	0	0	95	109	56	0	0
GB_GCA_001730085.1	TRUE	p__GCA-001730085	c__GCA-001730085	o__GCA-001730085	f__GCA-001730085	g__GCA-001730085	s__GCA-001730085 sp001730085	d__Bacteria	1907665	34.6937	1	0	0	0	0	193	0	0	0	0
GB_GCA_019192585.1	TRUE	p__Pseudomonadota	c__Alphaproteobacteria	o__Rhizobiales	f__MH13	g__MH13	s__MH13 sp019192585	d__Bacteria	3159117	63.3003	1	0	0	0	0	188	0	0	0	0
RS_GCF_016703145.1	TRUE	p__Pseudomonadota	c__Gammaproteobacteria	o__Burkholderiales	f__Burkholderiaceae	g__Ottowia	s__Ottowia sp016703145	d__Bacteria	4006449	68.5954	1	0	0	0	0	109	0	0	0	0
RS_GCF_014851805.1	TRUE	p__Pseudomonadota	c__Gammaproteobacteria	o__Xanthomonadales	f__Xanthomonadaceae	g__Pseudoxanthomonas_A	s__Pseudoxanthomonas_A sp014851805	d__Bacteria	4343195	66.6166	1	0	0	0	0	108	0	0	0	0
GB_GCA_025060195.1	TRUE	p__Planctomycetota	c__Planctomycetia	o__Gemmatales	f__HRBIN36	g__HRBIN36	s__HRBIN36 sp025060195	d__Bacteria	3937156	55.5357	1	0	0	0	0	106	0	0	0	0
GB_GCA_016870275.1	FALSE	p__Actinomycetota	c__Acidimicrobiia	o__Acidimicrobiales	f__Microtrichaceae	g__SXMI01	s__SXMI01 sp016870275	d__Bacteria	3197272	68.2012	0	0	0	0	0	0	0	0	0	0
RS_GCF_003352045.1	TRUE	p__Pseudomonadota	c__Alphaproteobacteria	o__Rhodobacterales	f__Rhodobacteraceae	g__JL08	s__JL08 sp003352045	d__Bacteria	4323690	57.5157	1	0	0	0	0	187	0	0	0	0
RS_GCF_002795865.1	TRUE	p__Pseudomonadota	c__Alphaproteobacteria	o__Sphingomonadales	f__Sphingomonadaceae	g__Qipengyuania	s__Qipengyuania seohaensis	d__Bacteria	2942673	61.6506	1	0	0	0	0	189	0	0	0	0
GB_GCA_001766905.1	TRUE	p__Acidobacteriota	c__Thermoanaerobaculia	o__Thermoanaerobaculales	f__Thermoanaerobaculaceae	g__RBG-13-68-16	s__RBG-13-68-16 sp001766905	d__Bacteria	3610782	67.6315	1	0	0	0	0	178	0	0	0	0
RS_GCF_946190375.1	TRUE	p__Bacillota	c__Bacilli	o__Lactobacillales	f__Streptococcaceae	g__Streptococcus	s__Streptococcus mitis_CJ	d__Bacteria	2217348	39.6866	1	0	0	0	0	182	0	0	0	0
RS_GCF_000969705.1	TRUE	p__Actinomycetota	c__Nitriliruptoria	o__Nitriliruptorales	f__Nitriliruptoraceae	g__Nitriliruptor	s__Nitriliruptor alkaliphilus	d__Bacteria	5558097	72.0595	1	0	0	0	0	126	0	0	0	0
RS_GCF_030816235.1	TRUE	p__Actinomycetota	c__Actinomycetes	o__Actinomycetales	f__Microbacteriaceae	g__Microbacterium	s__Microbacterium sp030816235	d__Bacteria	3835514	68.3665	1	0	0	0	0	219	0	0	0	0
RS_GCF_900163625.1	TRUE	p__Pseudomonadota	c__Alphaproteobacteria	o__Caulobacterales	f__Caulobacteraceae	g__Brevundimonas	s__Brevundimonas diminuta_A	d__Bacteria	3250103	66.9875	1	0	0	0	0	216	0	0	0	0
RS_GCF_000014005.1	TRUE	p__Acidobacteriota	c__Terriglobia	o__Terriglobales	f__Koribacteraceae	g__Koribacter	s__Koribacter versatilis_A	d__Bacteria	5650368	58.3838	1	0	0	0	0	198	0	0	0	0
RS_GCF_016586355.1	TRUE	p__Bacillota_A	c__Clostridia	o__Lachnospirales	f__Lachnospiraceae	g__Anaerostipes	s__Anaerostipes butyraticus	d__Bacteria	3173732	43.0032	1	0	0	0	0	176	0	0	0	0
RS_GCF_001435315.1	TRUE	p__Bacillota	c__Bacilli	o__Lactobacillales	f__Lactobacillaceae	g__Lentilactobacillus	s__Lentilactobacillus parabuchneri	d__Bacteria	2566098	43.4328	1	0	0	0	0	185	0	0	0	0
GB_GCA_963170185.1	FALSE	p__Bdellovibrionota	c__Bdellovibrionia	o__Bdellovibrionales	f__JAMPXM01	g__Ga0074137	s__Ga0074137 sp963170185	d__Bacteria	3542566	53.2264	0	0	0	0	0	0	0	0	0	0
RS_GCF_902779965.1	TRUE	p__Fibrobacterota	c__Fibrobacteria	o__Fibrobacterales	f__Fibrobacteraceae	g__Fibrobacter	s__Fibrobacter succinogenes_F	d__Bacteria	4094377	46.6975	1	0	0	0	0	105	0	0	0	0
RS_GCF_001458195.1	TRUE	p__Pseudomonadota	c__Alphaproteobacteria	o__Rhodobacterales	f__Rhodobacteraceae	g__Ruegeria	s__Ruegeria atlantica	d__Bacteria	4816147	56.3801	1	0	0	0	0	187	0	0	0	0
RS_GCF_009930795.1	TRUE	p__Actinomycetota	c__Actinomycetes	o__Actinomycetales	f__Microbacteriaceae	g__Marisediminicola	s__Marisediminicola antarctica	d__Bacteria	3352609	67.1728	1	0	0	0	0	263	0	0	0	0
RS_GCF_001029505.1	TRUE	p__Actinomycetota	c__Rubrobacteria	o__Rubrobacterales	f__Rubrobacteraceae	g__Rubrobacter_A	s__Rubrobacter_A aplysinae	d__Bacteria	3187461	65.0517	1	0	0	0	0	189	0	0	0	0
RS_GCF_001684955.1	TRUE	p__Bacteroidota	c__Bacteroidia	o__Flavobacteriales	f__Weeksellaceae	g__Chryseobacterium	s__Chryseobacterium contaminans	d__Bacteria	4704265	35.9079	1	0	0	0	0	96	0	0	0	0
RS_GCF_001440395.1	TRUE	p__Pseudomonadota	c__Alphaproteobacteria	o__Rhizobiales	f__Xanthobacteraceae	g__Bradyrhizobium	s__Bradyrhizobium jicamae	d__Bacteria	8738846	62.4005	1	0	0	0	0	201	0	0	0	0
RS_GCF_019972155.1	TRUE	p__Pseudomonadota	c__Alphaproteobacteria	o__Rhizobiales	f__Xanthobacteraceae	g__Bradyrhizobium	s__Bradyrhizobium sp019972155	d__Bacteria	8259668	64.1912	1	0	0	0	0	199	0	0	0	0
RS_GCF_024055715.1	TRUE	p__Actinomycetota	c__Actinomycetes	o__Streptosporangiales	f__Streptosporangiaceae	g__Actinoallomurus	s__Actinoallomurus sp024055715	d__Bacteria	9424154	71.4763	1	0	0	0	0	225	0	0	0	0
GB_GCA_013696305.1	TRUE	p__Nitrospirota	c__Nitrospiria	o__Nitrospirales	f__Nitrospiraceae	g__Nitrospira_A	s__Nitrospira_A sp013696305	d__Bacteria	3248677	57.3789	1	0	0	0	0	185	0	0	0	0
GB_GCA_024638215.1	FALSE	p__Acidobacteriota	c__Terriglobia	o__UBA7540	f__UBA7540	g__JAHEKS01	s__JAHEKS01 sp024638215	d__Bacteria	4898650	60.8033	0	0	0	0	0	0	0	0	0	0
GB_GCA_002781785.1	TRUE	p__Patescibacteria	c__ABY1	o__UBA9570	f__XYC2-FULL-38-9	g__UM-FILTER-45-8	s__UM-FILTER-45-8 sp002781785	d__Bacteria	1219034	45.0634	1	0	0	0	0	122	0	0	0	0
GB_GCA_009842325.1	TRUE	p__Actinomycetota	c__Acidimicrobiia	o__Acidimicrobiales	f__Aldehydirespiratoraceae	g__Aldehydirespirator	s__Aldehydirespirator sp009842325	d__Bacteria	3532688	68.7685	1	0	0	0	0	196	0	0	0	0
GB_GCA_022825265.1	FALSE	p__Chloroflexota	c__Dehalococcoidia	o__Bin125	f__Bin125	g__Bin125	s__Bin125 sp022825265	d__Bacteria	2888612	64.3374	0	0	0	0	0	0	0	0	0	0
GB_GCA_016234345.1	FALSE	p__Patescibacteria	c__Paceibacteria	o__UBA6257	f__GWB1-50-10	g__JACRFG01	s__JACRFG01 sp016234345	d__Bacteria	912756	42.5156	0	0	0	0	0	0	0	0	0	0
RS_GCF_019923565.1	FALSE	p__Pseudomonadota	c__Gammaproteobacteria	o__Enterobacterales	f__Enterobacteriaceae_A	g__Schneideria	s__Schneideria nysicola	d__Bacteria	572184	29.1851	0	0	0	0	0	0	0	0	0	0
RS_GCF_026427775.1	TRUE	p__Actinomycetota	c__Actinomycetes	o__Actinomycetales	f__Micrococcaceae	g__Arthrobacter	s__Arthrobacter sp026427775	d__Bacteria	5161232	63.7426	1	0	0	0	0	241	0	0	0	0
RS_GCF_024758705.1	TRUE	p__Pseudomonadota	c__Alphaproteobacteria	o__Sphingomonadales	f__Sphingomonadaceae	g__Sphingomonas	s__Sphingomonas sp024758705	d__Bacteria	3807233	66.0342	1	0	0	0	0	194	0	0	0	0
RS_GCF_000754265.1	FALSE	p__Pseudomonadota	c__Gammaproteobacteria	o__Enterobacterales	f__Enterobacteriaceae	g__Baumannia	s__Baumannia cicadellinicola_B	d__Bacteria	759425	38.9958	0	0	0	0	0	0	0	0	0	0
RS_GCF_020169515.1	TRUE	p__Bacillota	c__Bacilli	o__Paenibacillales	f__Paenibacillaceae	g__Pristimantibacillus	s__Pristimantibacillus vietnamensis	d__Bacteria	6313835	52.9135	1	0	0	0	0	182	0	0	0	0
RS_GCF_009749385.1	TRUE	p__Actinomycetota	c__Actinomycetes	o__Actinomycetales	f__Microbacteriaceae	g__Agromyces	s__Agromyces allii	d__Bacteria	4360803	70.7852	1	0	0	0	0	233	0	0	0	0
RS_GCF_002160325.1	TRUE	p__Bacillota_A	c__Clostridia	o__Lachnospirales	f__Lachnospiraceae	g__An181	s__An181 sp002160325	d__Bacteria	2771487	43.1732	1	0	0	0	0	178	0	0	0	0
GB_GCA_001784175.1	TRUE	p__Lindowbacteria	c__2-12-FULL-62-27	o__2-12-FULL-62-27	f__2-12-FULL-62-27	g__2-12-FULL-62-27	s__2-12-FULL-62-27 sp001784175	d__Bacteria	4388263	61.3427	1	0	0	0	0	180	0	0	0	0
RS_GCF_002356555.2	TRUE	p__Pseudomonadota	c__Gammaproteobacteria	o__Nitrococcales	f__Halorhodospiraceae	g__Halorhodospira	s__Halorhodospira halochloris	d__Bacteria	2834560	56.028	2	0	0	0	0	115	0	0	0	0
RS_GCF_900116515.1	TRUE	p__Actinomycetota	c__Actinomycetes	o__Mycobacteriales	f__Geodermatophilaceae	g__Geodermatophilus	s__Geodermatophilus amargosae	d__Bacteria	5869713	74.2374	1	0	0	0	0	228	0	0	0	0
RS_GCF_000239775.1	TRUE	p__Pseudomonadota	c__Alphaproteobacteria	o__Rhizobiales	f__Xanthobacteraceae	g__Bradyrhizobium	s__Bradyrhizobium sp000239775	d__Bacteria	7859468	65.4944	1	0	0	0	0	200	0	0	0	0
RS_GCF_900120125.1	TRUE	p__Bacillota	c__Bacilli	o__Staphylococcales	f__Gemellaceae	g__Gemella	s__Gemella massiliensis	d__Bacteria	1804814	30.5431	1	0	0	0	0	181	0	0	0	0
GB_GCA_900078405.1	TRUE	p__Pseudomonadota	c__Gammaproteobacteria	o__Xanthomonadales	f__Xanthomonadaceae	g__Stenotrophomonas	s__Stenotrophomonas sp900078405	d__Bacteria	3245011	67.7944	1	0	0	0	0	104	0	0	0	0
RS_GCF_001189235.2	TRUE	p__Pseudomonadota	c__Alphaproteobacteria	o__Rhizobiales	f__Xanthobacteraceae	g__Bradyrhizobium	s__Bradyrhizobium embrapense	d__Bacteria	8267832	63.9766	1	0	0	0	0	204	0	0	0	0
RS_GCF_000518305.1	FALSE	p__Bacillota_I	c__Bacilli_A	o__Mycoplasmatales	f__Mycoplasmoidaceae	g__Mycoplasmoides	s__Mycoplasmoides imitans	d__Bacteria	922439	30.5359	0	0	0	0	0	0	0	0	0	0
RS_GCF_017829975.1	TRUE	p__Bacillota	c__Bacilli	o__Lactobacillales	f__Vagococcaceae	g__Vagococcus_D	s__Vagococcus_D allomyrinae	d__Bacteria	5705793	39.7895	1	0	0	0	0	188	0	0	0	0
RS_GCF_011753055.1	TRUE	p__Pseudomonadota	c__Gammaproteobacteria	o__Burkholderiales	f__Burkholderiaceae	g__Paraburkholderia	s__Paraburkholderia sp011753055	d__Bacteria	8123560	62.9983	1	0	0	0	0	118	0	0	0	0
GB_GCA_009780275.1	TRUE	p__Bacillota_A	c__Clostridia	o__Oscillospirales	f__UBA929	g__WRAI01	s__WRAI01 sp009780275	d__Bacteria	2093019	48.8715	1	0	0	0	0	173	0	0	0	0
GB_GCA_016197225.1	TRUE	p__Chloroflexota	c__Anaerolineae	o__Anaerolineales	f__VGOW01	g__VGOW01	s__VGOW01 sp016197225	d__Bacteria	4807384	59.1767	1	0	0	0	0	192	0	0	0	0
GB_GCA_016223025.1	TRUE	p__Pseudomonadota	c__Gammaproteobacteria	o__Burkholderiales	f__Gallionellaceae	g__VIKH01	s__VIKH01 sp016223025	d__Bacteria	2753003	60.0183	2	0	0	0	0	121	0	0	0	0
GB_GCA_024508915.1	TRUE	p__Pseudomonadota	c__Gammaproteobacteria	o__Xanthomonadales	f__Xanthomonadaceae	g__Luteimonas_B	s__Luteimonas_B sp024508915	d__Bacteria	2391857	71.5111	1	0	0	0	0	109	0	0	0	0
RS_GCF_019873825.1	FALSE	p__Bacillota_I	c__Bacilli_A	o__Mycoplasmatales	f__Mycoplasmoidaceae	g__Mycoplasmoides	s__Mycoplasmoides sp019873825	d__Bacteria	925667	28.9653	0	0	0	0	0	0	0	0	0	0
GB_GCA_011051715.1	TRUE	p__Pseudomonadota	c__Gammaproteobacteria	o__Chromatiales	f__Sedimenticolaceae	g__HyVt-443	s__HyVt-443 sp011051715	d__Bacteria	3391892	66.9881	1	0	0	0	0	109	0	0	0	0
RS_GCF_028200735.1	TRUE	p__Actinomycetota	c__Actinomycetes	o__Streptomycetales	f__Streptomycetaceae	g__Streptomyces	s__Streptomyces sp028200735	d__Bacteria	5433563	71.4553	1	0	0	0	0	268	0	0	0	0
RS_GCF_004526235.1	TRUE	p__Bacteroidota	c__Bacteroidia	o__Sphingobacteriales	f__Sphingobacteriaceae	g__Sphingobacterium	s__Sphingobacterium sp002734245	d__Bacteria	3925976	40.6803	1	0	0	0	0	113	0	0	0	0
RS_GCF_002741985.1	TRUE	p__Pseudomonadota	c__Gammaproteobacteria	o__Enterobacterales	f__Vibrionaceae	g__Vibrio	s__Vibrio rotiferianus	d__Bacteria	5368584	44.6931	1	1	1	0	0	95	108	57	0	0
RS_GCF_004345725.1	TRUE	p__Pseudomonadota	c__Gammaproteobacteria	o__Burkholderiales	f__Chromobacteriaceae	g__Crenobacter	s__Crenobacter luteus	d__Bacteria	2860341	68.3461	1	0	0	0	0	113	0	0	0	0
GB_GCA_902826635.1	TRUE	p__Pseudomonadota	c__Gammaproteobacteria	o__Steroidobacterales	f__Steroidobacteraceae	g__CADEFQ01	s__CADEFQ01 sp902826635	d__Bacteria	3219171	67.474	1	0	0	0	0	106	0	0	0	0
GB_GCA_017410375.1	TRUE	p__Bacillota_A	c__Clostridia	o__RGIG6154	f__RGIG6154	g__RGIG6154	s__RGIG6154 sp017410375	d__Bacteria	2766448	42.8851	1	0	0	0	0	172	0	0	0	0
RS_GCF_019186785.1	TRUE	p__Pseudomonadota	c__Alphaproteobacteria	o__Rickettsiales	f__Anaplasmataceae	g__Neoehrlichia	s__Neoehrlichia mikurensis	d__Bacteria	1112301	26.8383	1	0	0	0	0	190	0	0	0	0
RS_GCF_003946325.1	TRUE	p__Bacillota	c__Bacilli	o__Lactobacillales	f__Lactobacillaceae	g__Companilactobacillus	s__Companilactobacillus furfuricola	d__Bacteria	2644344	38.6225	1	0	0	0	0	182	0	0	0	0
GB_GCA_023250635.1	FALSE	p__Bdellovibrionota	c__Oligoflexia	o__Oligoflexales	f__Bog-1112	g__JAHFAI01	s__JAHFAI01 sp023250635	d__Bacteria	2634926	49.2082	0	0	0	0	0	0	0	0	0	0
RS_GCF_015354345.1	TRUE	p__Pseudomonadota	c__Gammaproteobacteria	o__Burkholderiales	f__Methylophilaceae	g__Methylophilus	s__Methylophilus sp015354345	d__Bacteria	3015369	50.4797	1	0	0	0	0	108	0	0	0	0
GB_GCA_030425195.1	TRUE	p__Pseudomonadota	c__Gammaproteobacteria	o__Pseudomonadales	f__Azotimanducaceae_A	g__SZUA-309	s__SZUA-309 sp030425195	d__Bacteria	4631309	63.5794	1	0	0	0	0	99	0	0	0	0
GB_GCA_029946125.1	TRUE	p__Pseudomonadota	c__Gammaproteobacteria	o__Methylococcales	f__Methylomonadaceae	g__Methylobacter_A	s__Methylobacter_A titanis	d__Bacteria	3510200	47.7117	1	0	0	0	0	96	0	0	0	0
GB_GCA_016720685.1	TRUE	p__Pseudomonadota	c__Gammaproteobacteria	o__Burkholderiales	f__Rhodocyclaceae	g__Zoogloea	s__Zoogloea sp016720685	d__Bacteria	4052277	64.4462	2	0	0	0	0	126	0	0	0	0
GB_GCA_016705125.1	TRUE	p__Bacteroidota	c__Bacteroidia	o__Chitinophagales	f__JADIYW01	g__JADIYW01	s__JADIYW01 sp016705125	d__Bacteria	3302134	32.682	1	0	0	0	0	99	0	0	0	0
GB_GCA_016938135.1	TRUE	p__Actinomycetota	c__Coriobacteriia	o__Anaerosomatales	f__Anaerosomataceae	g__UBA2279	s__UBA2279 sp016938135	d__Bacteria	2133228	61.8986	1	0	0	0	0	180	0	0	0	0
RS_GCF_024925465.1	TRUE	p__Pseudomonadota	c__Gammaproteobacteria	o__Burkholderiales	f__Burkholderiaceae	g__Ralstonia	s__Ralstonia pseudosolanacearum	d__Bacteria	5690309	66.6143	1	0	0	0	0	117	0	0	0	0
RS_GCF_002715865.1	TRUE	p__Actinomycetota	c__Actinomycetes	o__Actinomycetales	f__Bifidobacteriaceae	g__Bifidobacterium	s__Bifidobacterium asteroides	d__Bacteria	2190368	60.0056	1	0	0	0	0	224	0	0	0	0
GB_GCA_012517255.1	TRUE	p__Armatimonadota	c__Chthonomonadetes	o__Chthonomonadales	f__CAJBBX01	g__JAAYVH01	s__JAAYVH01 sp012517255	d__Bacteria	4769596	64.5571	1	0	0	0	0	181	0	0	0	0
RS_GCF_021083645.1	TRUE	p__Actinomycetota	c__Actinomycetes	o__Actinomycetales	f__Actinomycetaceae	g__Pauljensenia	s__Pauljensenia sp021083645	d__Bacteria	1925904	49.3901	1	0	0	0	0	214	0	0	0	0
GB_GCA_903883645.1	FALSE	p__Myxococcota	c__UBA9042	o__UBA9042	f__UBA9042	g__SXRM01	s__SXRM01 sp903883645	d__Bacteria	5989005	64.3007	0	0	0	0	0	0	0	0	0	0
GB_GCA_026003395.1	TRUE	p__Bacteroidota	c__Bacteroidia	o__BPHE01	f__BPHE01	g__BPHE01	s__BPHE01 sp026003395	d__Bacteria	2543004	37.1546	1	0	0	0	0	98	0	0	0	0
GB_GCA_001784115.1	FALSE	p__Patescibacteria	c__Microgenomatia	o__Levybacterales	f__UBA12049	g__2-01-FULL-37-20	s__2-01-FULL-37-20 sp001784115	d__Bacteria	1110745	36.803	0	0	0	0	0	0	0	0	0	0
RS_GCF_021166635.1	TRUE	p__Pseudomonadota	c__Gammaproteobacteria	o__Pseudomonadales	f__Pseudomonadaceae	g__Pseudomonas_E	s__Pseudomonas_E petroselini	d__Bacteria	6944956	60.0645	1	0	0	0	0	101	0	0	0	0
RS_GCF_000025005.1	FALSE	p__Chloroflexota	c__Chloroflexia	o__Thermobaculales	f__Thermobaculaceae	g__Thermobaculum	s__Thermobaculum terrenum	d__Bacteria	3101581	53.5073	0	0	0	0	0	0	0	0	0	0
GB_GCA_017513185.1	TRUE	p__Patescibacteria	c__Saccharimonadia	o__Saccharimonadales	f__Nanosyncoccaceae	g__Nanosyncoccus	s__Nanosyncoccus sp017513185	d__Bacteria	755095	50.4513	1	0	0	0	0	121	0	0	0	0
GB_GCA_947260025.1	TRUE	p__Pseudomonadota	c__Gammaproteobacteria	o__GCA-001735895	f__GCA-001735895	g__GCA-001735895	s__GCA-001735895 sp947260025	d__Bacteria	3591058	57.9467	3	0	0	0	0	127	0	0	0	0
GB_GCA_934129945.1	TRUE	p__Bacillota_I	c__Bacilli_A	o__RF39	f__UBA660	g__RUG14121	s__RUG14121 sp934129945	d__Bacteria	1245266	24.9817	1	0	0	0	0	177	0	0	0	0
GB_GCA_017643025.1	TRUE	p__Pseudomonadota	c__Alphaproteobacteria	o__Rhizobiales	f__Rhizobiaceae	g__RCIO01	s__RCIO01 sp017643025	d__Bacteria	4011874	63.6986	1	0	0	0	0	193	0	0	0	0
RS_GCF_017908035.1	TRUE	p__Bacteroidota	c__Bacteroidia	o__Sphingobacteriales	f__Sphingobacteriaceae	g__Sphingobacterium	s__Sphingobacterium tabacisoli	d__Bacteria	5466592	40.6373	1	0	0	0	0	114	0	0	0	0
RS_GCF_001715975.1	TRUE	p__Pseudomonadota	c__Gammaproteobacteria	o__Chromatiales	f__Sedimenticolaceae	g__Thiodiazotropha	s__Thiodiazotropha endolucinida	d__Bacteria	4489993	52.5952	1	0	0	0	0	106	0	0	0	0
RS_GCF_025717605.1	TRUE	p__Pseudomonadota	c__Gammaproteobacteria	o__Burkholderiales	f__Burkholderiaceae	g__Paucibacter_A	s__Paucibacter_A sp025717605	d__Bacteria	5131730	62.0585	2	0	0	0	0	118	0	0	0	0
RS_GCF_023507745.1	TRUE	p__Pseudomonadota	c__Gammaproteobacteria	o__Pseudomonadales	f__Halomonadaceae	g__Vreelandella	s__Vreelandella olivaria_A	d__Bacteria	4471744	54.0895	1	0	1	0	0	102	0	69	0	0
RS_GCF_018128945.1	TRUE	p__Bacillota_A	c__Clostridia	o__Christensenellales	f__Aristaeellaceae	g__Aristaeella	s__Aristaeella hokkaidonensis	d__Bacteria	3390518	53.0374	1	0	0	0	0	179	0	0	0	0
RS_GCF_023073715.1	TRUE	p__Pseudomonadota	c__Alphaproteobacteria	o__Rhizobiales	f__Xanthobacteraceae	g__Bradyrhizobium	s__Bradyrhizobium sp023073715	d__Bacteria	7435646	63.2064	1	0	0	0	0	200	0	0	0	0
RS_GCF_000415505.1	TRUE	p__Actinomycetota	c__Actinomycetes	o__Streptomycetales	f__Streptomycetaceae	g__Streptomyces	s__Streptomyces afghaniensis	d__Bacteria	9848774	70.972	1	0	0	0	0	232	0	0	0	0
RS_GCF_001865245.1	TRUE	p__Actinomycetota	c__Actinomycetes	o__Streptomycetales	f__Streptomycetaceae	g__Streptomyces	s__Streptomyces sp001865245	d__Bacteria	6978886	73.4034	1	0	0	0	0	228	0	0	0	0
GB_GCA_002709385.1	TRUE	p__Chlamydiota	c__Chlamydiia	o__Chlamydiales	f__GCA-2709385	g__GCA-2709385	s__GCA-2709385 sp002709385	d__Bacteria	3152361	38.4836	1	0	0	0	0	210	0	0	0	0
RS_GCF_002934685.1	TRUE	p__Pseudomonadota	c__Gammaproteobacteria	o__Pseudomonadales	f__Pseudomonadaceae	g__Pseudomonas_E	s__Pseudomonas_E bohemica	d__Bacteria	6486653	59.4778	1	0	1	0	0	102	0	71	0	0
RS_GCF_002900095.1	TRUE	p__Bacteroidota	c__Bacteroidia	o__Flavobacteriales	f__Flavobacteriaceae	g__Salegentibacter	s__Salegentibacter mishustinae	d__Bacteria	3821969	36.9394	1	2	0	0	0	100	101	0	0	0
RS_GCF_000236035.1	TRUE	p__Pseudomonadota	c__Gammaproteobacteria	o__Pseudomonadales	f__Halomonadaceae	g__Vreelandella	s__Vreelandella boliviensis	d__Bacteria	4208238	54.6833	1	0	1	0	0	102	0	69	0	0
GB_GCA_027214125.1	TRUE	p__Pseudomonadota	c__Gammaproteobacteria	o__Burkholderiales	f__Rhodocyclaceae	g__Nitrogeniibacter	s__Nitrogeniibacter sp027214125	d__Bacteria	4394465	63.3603	2	0	0	0	0	122	0	0	0	0
GB_GCA_030017715.1	TRUE	p__Acidobacteriota	c__Aminicenantia	o__Aminicenantales	f__Saccharicenantaceae	g__Saccharicenans	s__Saccharicenans sp030017715	d__Bacteria	2894397	52.5837	1	0	0	0	0	174	0	0	0	0
GB_GCA_029202985.1	TRUE	p__Pseudomonadota	c__Alphaproteobacteria	o__Sphingomonadales	f__Sphingomonadaceae	g__Andeanibacterium	s__Andeanibacterium colombiense	d__Bacteria	3546138	65.3712	1	0	0	0	0	188	0	0	0	0
RS_GCF_001043175.1	TRUE	p__Pseudomonadota	c__Gammaproteobacteria	o__Pseudomonadales	f__Oleiphilaceae	g__Marinobacter	s__Marinobacter psychrophilus	d__Bacteria	3998597	53.8449	1	0	1	0	0	99	0	70	0	0
RS_GCF_002950575.1	TRUE	p__Actinomycetota	c__Actinomycetes	o__Actinomycetales	f__Microbacteriaceae	g__Pontimonas	s__Pontimonas salivibrio	d__Bacteria	1760810	58.3348	1	0	0	0	0	215	0	0	0	0
RS_GCF_009497655.1	TRUE	p__Bacillota	c__Bacilli	o__Bacillales	f__Bacillaceae_H	g__Priestia	s__Priestia zanthoxyli	d__Bacteria	5243446	38.1228	1	0	0	0	0	183	0	0	0	0
RS_GCF_000011745.1	FALSE	p__Pseudomonadota	c__Gammaproteobacteria	o__Enterobacterales	f__Enterobacteriaceae_A	g__Blochmannia	s__Blochmannia pennsylvanicus	d__Bacteria	791654	29.5647	0	0	0	0	0	0	0	0	0	0
RS_GCF_017488845.2	TRUE	p__Pseudomonadota	c__Alphaproteobacteria	o__Rhizobiales	f__Rhizobiaceae	g__Ensifer	s__Ensifer canadensis	d__Bacteria	8094229	60.9575	1	0	0	0	0	189	0	0	0	0
RS_GCF_000013045.1	TRUE	p__Bacteroidota	c__Rhodothermia	o__Rhodothermales	f__Salinibacteraceae	g__Salinibacter	s__Salinibacter ruber	d__Bacteria	3587328	66.1348	1	0	0	0	0	106	0	0	0	0
GB_GCA_947367845.1	TRUE	p__Bacillota_A	c__Clostridia	o__TANB77	f__CAG-508	g__CAG-269	s__CAG-269 sp947367845	d__Bacteria	1497086	29.615	1	0	0	0	0	175	0	0	0	0
GB_GCA_002436205.1	TRUE	p__Patescibacteria	c__Gracilibacteria	o__Peribacterales	f__Peribacteraceae	g__UBA2170	s__UBA2170 sp002436205	d__Bacteria	1115786	44.8136	1	0	0	0	0	117	0	0	0	0
GB_GCA_947470855.1	TRUE	p__Verrucomicrobiota	c__Verrucomicrobiae	o__Opitutales	f__UBA953	g__UBA953	s__UBA953 sp947470855	d__Bacteria	1365745	48.6823	1	1	0	0	0	119	119	0	0	0
RS_GCF_937980635.1	TRUE	p__Campylobacterota	c__Campylobacteria	o__Campylobacterales	f__Campylobacteraceae	g__Campylobacter_B	s__Campylobacter_B sp937980635	d__Bacteria	2198141	46.8508	1	0	0	0	0	180	0	0	0	0
RS_GCF_000174015.1	TRUE	p__Actinomycetota	c__Coriobacteriia	o__Coriobacteriales	f__Atopobiaceae	g__Lancefieldella	s__Lancefieldella rimae	d__Bacteria	1626291	49.2623	1	0	0	0	0	195	0	0	0	0
GB_GCA_002898675.1	FALSE	p__Bacteroidota	c__Kapaibacteriia	o__Kapaibacteriales	f__NICIL-2	g__NICIL-2	s__NICIL-2 sp002898675	d__Bacteria	1993452	57.2837	0	0	0	0	0	0	0	0	0	0
RS_GCF_003946515.1	TRUE	p__Bacillota	c__Bacilli	o__Lactobacillales	f__Lactobacillaceae	g__Companilactobacillus	s__Companilactobacillus zhongbaensis	d__Bacteria	2644863	39.3602	1	0	0	0	0	182	0	0	0	0
GB_GCA_002421425.1	TRUE	p__WOR-3	c__Hydrothermia	o__UBA1063	f__UBA1063	g__UBA1063	s__UBA1063 sp002421425	d__Bacteria	1622116	41.7691	1	0	0	0	0	97	0	0	0	0
RS_GCF_001887775.1	TRUE	p__Desulfobacterota	c__Desulfuromonadia	o__Desulfuromonadales	f__Syntrophotaleaceae	g__Syntrophotalea_A	s__Syntrophotalea_A acetylenivorans	d__Bacteria	3218469	53.4117	1	0	0	0	0	182	0	0	0	0
RS_GCF_009828585.1	TRUE	p__Pseudomonadota	c__Gammaproteobacteria	o__Enterobacterales	f__Shewanellaceae	g__Shewanella	s__Shewanella litoralis	d__Bacteria	4642138	42.8023	1	2	1	0	0	95	118	58	0	0
RS_GCF_015461805.1	TRUE	p__Pseudomonadota	c__Gammaproteobacteria	o__Pseudomonadales	f__Pseudomonadaceae	g__Pseudomonas_E	s__Pseudomonas_E pisciculturae	d__Bacteria	6223697	60.0193	1	0	0	0	0	101	0	0	0	0
GB_GCA_021852345.1	FALSE	p__Actinomycetota	c__Acidimicrobiia	o__Acidimicrobiales	f__JABEUL01	g__JAJZNL01	s__JAJZNL01 sp021852345	d__Bacteria	2251991	40.5741	0	0	0	0	0	0	0	0	0	0
RS_GCF_015476655.1	TRUE	p__Bacteroidota	c__Bacteroidia	o__Cytophagales	f__Cyclobacteriaceae	g__Aquiflexum	s__Aquiflexum lacus	d__Bacteria	5940513	39.0382	1	0	0	0	0	101	0	0	0	0
GB_GCA_027622275.1	TRUE	p__Planctomycetota	c__Planctomycetia	o__Pirellulales	f__Pirellulaceae	g__GCA-2726245	s__GCA-2726245 sp027622275	d__Bacteria	9782536	58.4186	1	0	0	0	0	121	0	0	0	0
RS_GCF_013407595.1	TRUE	p__Bacillota	c__Bacilli	o__Lactobacillales	f__Lactobacillaceae	g__Lacticaseibacillus	s__Lacticaseibacillus absianus	d__Bacteria	2843141	59.8541	1	0	0	0	0	184	0	0	0	0
RS_GCF_005503145.1	TRUE	p__Pseudomonadota	c__Gammaproteobacteria	o__Burkholderiales	f__Burkholderiaceae	g__Paraburkholderia	s__Paraburkholderia sp005503145	d__Bacteria	9157448	62.3925	1	0	0	0	0	119	0	0	0	0
GB_GCA_016710685.1	TRUE	p__Bacteroidota	c__Bacteroidia	o__Flavobacteriales	f__PHOS-HE28	g__PHOS-HE28	s__PHOS-HE28 sp016710685	d__Bacteria	4205193	56.913	1	0	0	0	0	101	0	0	0	0
RS_GCF_001746755.1	TRUE	p__Pseudomonadota	c__Alphaproteobacteria	o__Rhodospirillales_A	f__Magnetovibrionaceae	g__Magnetovibrio	s__Magnetovibrio blakemorei	d__Bacteria	3638804	54.2893	1	0	0	0	0	193	0	0	0	0
RS_GCF_024347535.1	TRUE	p__Pseudomonadota	c__Gammaproteobacteria	o__Enterobacterales	f__Vibrionaceae	g__Vibrio	s__Vibrio kanaloae	d__Bacteria	4652496	43.9495	1	2	1	0	0	95	118	57	0	0
RS_GCF_000325705.1	TRUE	p__Bacteroidota	c__Bacteroidia	o__Cytophagales	f__Cyclobacteriaceae	g__Echinicola	s__Echinicola vietnamensis	d__Bacteria	5608040	44.7537	1	0	0	0	0	101	0	0	0	0
RS_GCF_000243135.2	TRUE	p__Bacillota_B	c__Desulfitobacteriia	o__Desulfitobacteriales	f__Desulfitobacteriaceae	g__Desulfitobacterium	s__Desulfitobacterium dichloroeliminans	d__Bacteria	3624449	44.2179	1	0	0	0	0	176	0	0	0	0
RS_GCF_000582535.1	FALSE	p__Bacillota_I	c__Bacilli_A	o__Mycoplasmatales	f__Hepatoplasmataceae	g__Hepatoplasma	s__Hepatoplasma crinochetorum	d__Bacteria	657101	22.5303	0	0	0	0	0	0	0	0	0	0
GB_GCA_003268675.1	TRUE	p__Actinomycetota	c__Actinomycetes	o__Streptomycetales	f__Streptomycetaceae	g__Streptomyces	s__Streptomyces bacillaris	d__Bacteria	7888441	71.9541	2	0	0	0	0	265	0	0	0	0
RS_GCF_020866845.1	TRUE	p__Pseudomonadota	c__Alphaproteobacteria	o__Sphingomonadales	f__Sphingomonadaceae	g__Sphingomonas	s__Sphingomonas radiodurans	d__Bacteria	3678193	65.746	1	0	0	0	0	196	0	0	0	0
RS_GCF_004118155.1	TRUE	p__Bacteroidota	c__Bacteroidia	o__Chitinophagales	f__Chitinophagaceae	g__Edaphocola	s__Edaphocola flava	d__Bacteria	3545609	43.5862	1	0	0	0	0	99	0	0	0	0
RS_GCF_006715175.1	TRUE	p__Actinomycetota	c__Actinomycetes	o__Actinomycetales	f__Microbacteriaceae	g__Curtobacterium	s__Curtobacterium citreum	d__Bacteria	3612036	71.9341	1	0	0	0	0	231	0	0	0	0
RS_GCF_009857505.1	TRUE	p__Pseudomonadota	c__Gammaproteobacteria	o__Burkholderiales	f__Burkholderiaceae	g__Duganella	s__Duganella lactea	d__Bacteria	5925223	63.2501	2	0	0	0	0	125	0	0	0	0
RS_GCF_014193585.1	TRUE	p__Desulfobacterota	c__Desulfuromonadia	o__Geobacterales	f__Geobacteraceae	g__Geomonas	s__Geomonas paludis	d__Bacteria	5114951	62.4095	1	0	0	0	0	182	0	0	0	0
GB_GCA_026989495.1	TRUE	p__Pseudomonadota	c__Gammaproteobacteria	o__S144-34	f__S144-34	g__S144-34	s__S144-34 sp026989495	d__Bacteria	2541294	73.1221	1	0	0	0	0	97	0	0	0	0
GB_GCA_910587045.1	TRUE	p__Bacillota_A	c__Clostridia	o__Lachnospirales	f__Lachnospiraceae	g__CAG-632	s__CAG-632 sp910587045	d__Bacteria	2758769	45.3474	1	0	0	0	0	175	0	0	0	0
GB_GCA_001804415.1	FALSE	p__Omnitrophota	c__Koll11	o__Aquiviventales	f__Aquiviventaceae	g__Aquivivens	s__Aquivivens invisus	d__Bacteria	1420395	63.3671	0	0	0	0	0	0	0	0	0	0
RS_GCF_000308435.1	TRUE	p__Actinomycetota	c__Actinomycetes	o__Mycobacteriales	f__Mycobacteriaceae	g__Nocardia	s__Nocardia araoensis	d__Bacteria	7722536	68.39	1	0	0	0	0	243	0	0	0	0
RS_GCF_900106015.1	TRUE	p__Pseudomonadota	c__Gammaproteobacteria	o__Pseudomonadales	f__Pseudomonadaceae	g__Pseudomonas_E	s__Pseudomonas_E sihuiensis	d__Bacteria	5476367	62.5369	1	0	2	0	0	102	0	71	0	0
RS_GCF_000423105.1	TRUE	p__Bacillota	c__Bacilli	o__Bacillales_D	f__Alkalibacillaceae	g__Halalkalibacillus	s__Halalkalibacillus halophilus	d__Bacteria	2707549	37.4335	1	0	0	0	0	184	0	0	0	0
GB_GCA_016802835.1	TRUE	p__Actinomycetota	c__Actinomycetes	o__Mycobacteriales	f__Micromonosporaceae	g__Micromonospora	s__Micromonospora sp016802835	d__Bacteria	6143223	71.615	1	0	0	0	0	210	0	0	0	0
GB_GCA_902523065.1	FALSE	p__Bacteroidota	c__Bacteroidia	o__Cytophagales_B	f__MED-G16	g__MED-G16	s__MED-G16 sp902523065	d__Bacteria	1636802	31.4294	0	0	0	0	0	0	0	0	0	0
RS_GCF_902489635.1	FALSE	p__Bacteroidota	c__Bacteroidia	o__Bacteroidales	f__Porphyromonadaceae	g__Porphyromonas	s__Porphyromonas sp902489635	d__Bacteria	2173953	53.1515	0	0	0	0	0	0	0	0	0	0
RS_GCF_002101845.1	TRUE	p__Actinomycetota	c__Actinomycetes	o__Mycobacteriales	f__Mycobacteriaceae	g__Mycobacterium	s__Mycobacterium riyadhense	d__Bacteria	6269850	65.2817	1	0	0	0	0	238	0	0	0	0
RS_GCF_004123905.1	TRUE	p__Pseudomonadota	c__Alphaproteobacteria	o__Rhizobiales	f__Xanthobacteraceae	g__Bradyrhizobium	s__Bradyrhizobium betae_A	d__Bacteria	8630250	63.7535	1	0	0	0	0	199	0	0	0	0
RS_GCF_014083865.1	TRUE	p__Bacillota	c__Bacilli	o__Bacillales_D	f__Amphibacillaceae	g__Paraliobacillus	s__Paraliobacillus salinarum	d__Bacteria	2799568	35.2848	1	0	0	0	0	186	0	0	0	0
RS_GCF_016599045.1	FALSE	p__Campylobacterota	c__Campylobacteria	o__Campylobacterales	f__Campylobacteraceae	g__Campylobacter_D	s__Campylobacter_D sp016599045	d__Bacteria	1487666	26.735	0	0	0	0	0	0	0	0	0	0
RS_GCF_015477775.1	TRUE	p__Actinomycetota	c__Actinomycetes	o__Mycobacteriales	f__Mycobacteriaceae	g__Nocardia	s__Nocardia abscessus_A	d__Bacteria	8698275	68.3579	1	0	0	0	0	242	0	0	0	0
RS_GCF_000312125.1	TRUE	p__Actinomycetota	c__Actinomycetes	o__Actinomycetales	f__Cellulomonadaceae	g__Timonella	s__Timonella senegalensis	d__Bacteria	3009940	61.4291	1	0	0	0	0	216	0	0	0	0
RS_GCF_001984065.1	TRUE	p__Pseudomonadota	c__Gammaproteobacteria	o__Pseudomonadales	f__Pseudomonadaceae	g__Pseudomonas_E	s__Pseudomonas_E sp001984065	d__Bacteria	6384104	60.78	1	0	0	0	0	102	0	0	0	0
GB_GCA_002772535.1	FALSE	p__Patescibacteria	c__Gracilibacteria	o__UBA1369	f__LOWO2-01-FULL-3	g__1-14-0-10-36-19	s__1-14-0-10-36-19 sp002772535	d__Bacteria	1074598	35.8064	0	0	0	0	0	0	0	0	0	0
GB_GCA_028866015.1	TRUE	p__Pseudomonadota	c__Gammaproteobacteria	o__Burkholderiales	f__Ferrovaceae	g__JAKBAT01	s__JAKBAT01 sp028866015	d__Bacteria	2358501	61.1366	1	0	0	0	0	107	0	0	0	0
RS_GCF_002283555.1	FALSE	p__Bacteroidota	c__Rhodothermia	o__Rhodothermales	f__Rubricoccaceae	g__Rubrivirga	s__Rubrivirga sp002283555	d__Bacteria	4480430	71.3462	0	0	0	0	0	0	0	0	0	0
GB_GCA_009885795.1	TRUE	p__Pseudomonadota	c__Alphaproteobacteria	o__Dongiales	f__Dongiaceae	g__VFKA01	s__VFKA01 sp009885795	d__Bacteria	3460272	65.7111	1	0	0	0	0	200	0	0	0	0
GB_GCA_020635135.1	FALSE	p__Bdellovibrionota	c__Bacteriovoracia	o__Bacteriovoracales	f__Bacteriovoracaceae	g__JACKAJ01	s__JACKAJ01 sp020635135	d__Bacteria	2840259	37.5578	0	0	0	0	0	0	0	0	0	0
GB_GCA_024707305.1	FALSE	p__Bacteroidota	c__Bacteroidia	o__Chitinophagales	f__Chitinophagaceae	g__Terrimonas_A	s__Terrimonas_A sp024707305	d__Bacteria	3859528	44.4411	0	0	0	0	0	0	0	0	0	0
GB_GCA_016932045.1	TRUE	p__Patescibacteria	c__Dojkabacteria	o__JAHIVN01	f__JAHIVN01	g__JAFGDO01	s__JAFGDO01 sp016932045	d__Bacteria	1463828	36.8775	1	0	0	0	0	195	0	0	0	0
GB_GCA_027592035.1	FALSE	p__Actinomycetota	c__Acidimicrobiia	o__Acidimicrobiales	f__Ilumatobacteraceae	g__Casp-actino8	s__Casp-actino8 sp001510455	d__Bacteria	2271429	62.8572	0	0	0	0	0	0	0	0	0	0
GB_GCA_025966135.1	TRUE	p__Actinomycetota	c__Actinomycetes	o__Mycobacteriales	f__SCTD01	g__RYN-111	s__RYN-111 sp025966135	d__Bacteria	3707033	70.0439	1	0	0	0	0	199	0	0	0	0
RS_GCF_000340865.1	TRUE	p__Pseudomonadota	c__Gammaproteobacteria	o__Burkholderiales	f__Burkholderiaceae_A	g__Kinetoplastibacterium	s__Kinetoplastibacterium oncopeltii	d__Bacteria	810172	31.2298	1	0	0	0	0	107	0	0	0	0
GB_GCA_943354555.1	TRUE	p__Patescibacteria	c__Gracilibacteria	o__Peribacterales	f__Peribacteraceae	g__2-12-FULL-55-11	s__2-12-FULL-55-11 sp943354555	d__Bacteria	1164754	51.3457	1	0	0	0	0	115	0	0	0	0
RS_GCF_028464145.1	TRUE	p__Bacteroidota	c__Bacteroidia	o__Flavobacteriales	f__Flavobacteriaceae	g__Maribacter	s__Maribacter sp028464145	d__Bacteria	4727315	38.6243	1	2	0	0	0	100	103	0	0	0
GB_GCA_011042225.1	TRUE	p__Desulfobacterota	c__Dissulfuribacteria	o__Dissulfuribacterales	f__UBA3076	g__UBA3076	s__UBA3076 sp011042225	d__Bacteria	2049612	45.7478	1	0	0	0	0	176	0	0	0	0
GB_GCA_903918755.1	TRUE	p__Verrucomicrobiota	c__Verrucomicrobiae	o__Limisphaerales	f__Pedosphaeraceae	g__CAIXFN01	s__CAIXFN01 sp903918755	d__Bacteria	7194820	60.5531	1	0	0	0	0	117	0	0	0	0
GB_GCA_023397475.1	TRUE	p__Bacillota_A	c__Clostridia	o__Saccharofermentanales	f__Saccharofermentanaceae	g__Firm-13	s__Firm-13 sp023397475	d__Bacteria	2960682	51.2728	1	0	0	0	0	179	0	0	0	0
RS_GCF_000719095.1	TRUE	p__Actinomycetota	c__Actinomycetes	o__Streptomycetales	f__Streptomycetaceae	g__Streptacidiphilus	s__Streptacidiphilus jeojiense	d__Bacteria	9156717	71.4526	1	0	0	0	0	210	0	0	0	0
RS_GCF_000430625.1	TRUE	p__Bacillota	c__Bacilli	o__Aneurinibacillales	f__Aneurinibacillaceae	g__Aneurinibacillus_B	s__Aneurinibacillus_B terranovensis	d__Bacteria	4247673	44.8908	1	0	0	0	0	185	0	0	0	0
GB_GCA_937900185.1	TRUE	p__Zixibacteria	c__MSB-5A5	o__GN15	f__FEB-12	g__QQUK01	s__QQUK01 sp913009765	d__Bacteria	3215068	35.8129	1	0	0	0	0	119	0	0	0	0
RS_GCF_000155475.1	FALSE	p__Campylobacterota	c__Campylobacteria	o__Campylobacterales	f__Helicobacteraceae	g__Helicobacter_C	s__Helicobacter_C cinaedi	d__Bacteria	2214470	38.4573	0	0	0	0	0	0	0	0	0	0
GB_GCA_910577845.1	TRUE	p__Bacillota_A	c__Clostridia	o__Christensenellales	f__UBA3700	g__MGBC100798	s__MGBC100798 sp910577845	d__Bacteria	1712450	31.0785	1	0	0	0	0	179	0	0	0	0
RS_GCF_010119385.1	TRUE	p__Actinomycetota	c__Actinomycetes	o__Actinomycetales	f__Micrococcaceae	g__Nesterenkonia	s__Nesterenkonia haasae	d__Bacteria	3434649	60.8012	1	0	0	0	0	242	0	0	0	0
GB_GCA_002352935.1	FALSE	p__Bacillota_B	c__Moorellia	o__UBA1874	f__UBA1874	g__UBA1874	s__UBA1874 sp002352935	d__Bacteria	1579730	42.2503	0	0	0	0	0	0	0	0	0	0
GB_GCA_007618135.1	TRUE	p__Planctomycetota	c__Brocadiia	o__Brocadiales	f__Brocadiaceae	g__Brocadia	s__Brocadia sp007618135	d__Bacteria	5037263	43.1831	1	0	0	0	0	120	0	0	0	0
RS_GCF_001428665.1	TRUE	p__Pseudomonadota	c__Gammaproteobacteria	o__Burkholderiales	f__Burkholderiaceae	g__Acidovorax	s__Acidovorax sp001428665	d__Bacteria	6820941	66.8366	2	0	0	0	0	113	0	0	0	0
GB_GCA_030447305.1	TRUE	p__Actinomycetota	c__UBA4738	o__JAHWKV01	f__JAHWKV01	g__JAJCYE01	s__JAJCYE01 sp030447305	d__Bacteria	2878801	63.0596	1	0	0	0	0	129	0	0	0	0
RS_GCF_026239735.1	TRUE	p__Bacteroidota	c__Bacteroidia	o__Sphingobacteriales	f__Sphingobacteriaceae	g__Pedobacter	s__Pedobacter sp026239735	d__Bacteria	5565015	38.1256	1	0	0	0	0	115	0	0	0	0
GB_GCA_007376125.1	TRUE	p__Patescibacteria	c__Paceibacteria	o__Sungbacterales	f__HO2-52-23	g__VMFQ01	s__VMFQ01 sp007376125	d__Bacteria	1047668	45.8226	1	0	0	0	0	138	0	0	0	0
GB_GCA_903911925.1	TRUE	p__Acidobacteriota	c__Terriglobia	o__Terriglobales	f__Acidobacteriaceae	g__Occallatibacter	s__Occallatibacter sp903911925	d__Bacteria	5794370	59.202	1	0	0	0	0	211	0	0	0	0
RS_GCF_029760935.1	TRUE	p__Actinomycetota	c__Actinomycetes	o__Actinomycetales	f__Microbacteriaceae	g__HNR	s__HNR sp029760935	d__Bacteria	2918483	56.1348	1	0	0	0	0	221	0	0	0	0
RS_GCF_003970695.1	TRUE	p__Bacteroidota	c__Bacteroidia	o__Flavobacteriales	f__Flavobacteriaceae	g__Maribacter	s__Maribacter sp002742365	d__Bacteria	4016247	39.3461	1	1	0	0	0	100	100	0	0	0
RS_GCF_010728155.1	TRUE	p__Actinomycetota	c__Actinomycetes	o__Mycobacteriales	f__Mycobacteriaceae	g__Mycobacterium	s__Mycobacterium doricum	d__Bacteria	4029398	67.5086	1	0	0	0	0	226	0	0	0	0
RS_GCF_014084125.1	TRUE	p__Actinomycetota	c__Actinomycetes	o__Streptomycetales	f__Streptomycetaceae	g__Streptacidiphilus	s__Streptacidiphilus sp014084125	d__Bacteria	7672494	72.6397	2	0	0	0	0	210	0	0	0	0
RS_GCF_020176955.2	TRUE	p__Actinomycetota	c__Actinomycetes	o__Mycobacteriales	f__Mycobacteriaceae	g__Nocardia	s__Nocardia sp020176955	d__Bacteria	9737565	69.3178	1	0	0	0	0	202	0	0	0	0
GB_GCA_900539915.1	TRUE	p__Bacteroidota	c__Bacteroidia	o__Bacteroidales	f__Muribaculaceae	g__Amulumruptor	s__Amulumruptor sp900539915	d__Bacteria	2162791	52.5103	1	0	0	0	0	97	0	0	0	0
RS_GCF_001679645.1	TRUE	p__Pseudomonadota	c__Gammaproteobacteria	o__Pseudomonadales	f__Pseudomonadaceae	g__Pseudomonas_E	s__Pseudomonas_E bananamidigenes	d__Bacteria	5971527	60.6209	1	0	1	0	0	102	0	71	0	0
RS_GCF_900112155.1	FALSE	p__Bacillota_A	c__Clostridia	o__Oscillospirales	f__Ruminococcaceae	g__Hominimerdicola	s__Hominimerdicola alba_D	d__Bacteria	4276527	44.8552	0	0	0	0	0	0	0	0	0	0
RS_GCF_003044425.1	TRUE	p__Pseudomonadota	c__Gammaproteobacteria	o__Burkholderiales	f__Neisseriaceae	g__Neisseria	s__Neisseria sicca_C	d__Bacteria	2443310	51.3886	1	0	0	0	0	104	0	0	0	0
RS_GCF_017312725.1	TRUE	p__Actinomycetota	c__Actinomycetes	o__Mycobacteriales	f__Micromonosporaceae	g__Actinocatenispora	s__Actinocatenispora comari	d__Bacteria	7964335	72.8976	1	0	0	0	0	204	0	0	0	0
RS_GCF_003003035.1	TRUE	p__Bacteroidota	c__Bacteroidia	o__Bacteroidales	f__Marinilabiliaceae	g__Marinilabilia	s__Marinilabilia salmonicolor_A	d__Bacteria	4790522	42.4492	1	0	0	0	0	99	0	0	0	0
RS_GCF_024505165.1	TRUE	p__Pseudomonadota	c__Gammaproteobacteria	o__Methylococcales	f__Methylomonadaceae	g__Methylomonas	s__Methylomonas sp018335995	d__Bacteria	4523345	53.3545	1	0	0	0	0	96	0	0	0	0
GB_GCA_905181935.1	TRUE	p__Pseudomonadota	c__Alphaproteobacteria	o__Rhodobacterales	f__Rhodobacteraceae	g__Amylibacter	s__Amylibacter sp905181935	d__Bacteria	2385254	38.9978	1	0	0	0	0	192	0	0	0	0
GB_GCA_030592575.1	FALSE	p__WOR-3	c__UBA3073	o__JACQXS01	f__JACQXS01	g__JAGMCN01	s__JAGMCN01 sp030592575	d__Bacteria	2486167	34.5697	0	0	0	0	0	0	0	0	0	0
RS_GCF_029960115.1	TRUE	p__Pseudomonadota	c__Gammaproteobacteria	o__Xanthomonadales	f__Xanthomonadaceae	g__Stenotrophomonas	s__Stenotrophomonas sp029960115	d__Bacteria	4792854	65.4678	1	0	0	0	0	105	0	0	0	0
RS_GCF_003719195.1	TRUE	p__Pseudomonadota	c__Gammaproteobacteria	o__Burkholderiales	f__Burkholderiaceae	g__Herbaspirillum	s__Herbaspirillum rubrisubalbicans	d__Bacteria	5617593	61.4959	1	0	0	0	0	120	0	0	0	0
RS_GCF_009765275.1	TRUE	p__Pseudomonadota	c__Alphaproteobacteria	o__Rhodobacterales	f__Rhodobacteraceae	g__Chachezhania	s__Chachezhania sediminis	d__Bacteria	5596458	65.6429	1	0	0	0	0	187	0	0	0	0
RS_GCF_002872255.1	TRUE	p__Bacillota	c__Bacilli	o__Lactobacillales	f__Lactobacillaceae	g__Companilactobacillus	s__Companilactobacillus nuruki	d__Bacteria	2582291	34.1538	1	0	0	0	0	182	0	0	0	0
RS_GCF_024519435.1	TRUE	p__Actinomycetota	c__Actinomycetes	o__Actinomycetales	f__Dermatophilaceae	g__Terrabacter	s__Terrabacter sp024519435	d__Bacteria	4831409	71.2451	1	0	0	0	0	217	0	0	0	0
RS_GCF_009208075.1	TRUE	p__Campylobacterota	c__Campylobacteria	o__Campylobacterales	f__Arcobacteraceae	g__Poseidonibacter	s__Poseidonibacter ostreae	d__Bacteria	2958551	27.4612	1	0	0	0	0	180	0	0	0	0
GB_GCA_002839765.1	FALSE	p__Bacteroidota	c__Kapaibacteriia	o__Kapaibacteriales	f__UBA2268	g__PGYR01	s__PGYR01 sp002839765	d__Bacteria	3363191	34.0573	0	0	0	0	0	0	0	0	0	0
GB_GCA_020348265.1	TRUE	p__Planctomycetota	c__Phycisphaerae	o__UBA1845	f__UBA1845	g__GCA-020348265	s__GCA-020348265 sp020348265	d__Bacteria	5666113	58.7592	1	0	0	0	0	106	0	0	0	0
GB_GCA_018897395.1	TRUE	p__Planctomycetota	c__Planctomycetia	o__Pirellulales	f__Thermoguttaceae	g__JAHIKV01	s__JAHIKV01 sp018897395	d__Bacteria	4488067	60.4508	1	0	0	0	0	104	0	0	0	0
GB_GCA_012033205.1	TRUE	p__Cyanobacteriota	c__Cyanobacteriia	o__Cyanobacteriales	f__Nostocaceae	g__Rivularia	s__Rivularia sp012033205	d__Bacteria	7552247	37.3453	1	0	0	0	0	213	0	0	0	0
RS_GCF_002370355.1	TRUE	p__Bacillota	c__Bacilli	o__Lactobacillales	f__Lactobacillaceae	g__Latilactobacillus	s__Latilactobacillus sakei	d__Bacteria	1943136	41.1509	1	0	0	0	0	181	0	0	0	0
RS_GCF_000189415.1	TRUE	p__Bacteroidota	c__Bacteroidia	o__Flavobacteriales	f__Weeksellaceae	g__Weeksella	s__Weeksella virosa	d__Bacteria	2272954	35.9217	1	0	0	0	0	99	0	0	0	0
RS_GCF_026559675.1	TRUE	p__Actinomycetota	c__Actinomycetes	o__Actinomycetales	f__Microbacteriaceae	g__Microbacterium	s__Microbacterium oxydans_D	d__Bacteria	3782954	69.7183	1	0	0	0	0	218	0	0	0	0
RS_GCF_900637025.1	TRUE	p__Bacillota	c__Bacilli	o__Lactobacillales	f__Streptococcaceae	g__Streptococcus	s__Streptococcus oralis	d__Bacteria	1931548	41.5089	1	0	0	0	0	182	0	0	0	0
RS_GCF_000015025.1	TRUE	p__Actinomycetota	c__Actinomycetes	o__Acidothermales	f__Acidothermaceae	g__Acidothermus	s__Acidothermus cellulolyticus	d__Bacteria	2443540	66.9074	1	0	0	0	0	326	0	0	0	0
RS_GCF_004920835.1	TRUE	p__Pseudomonadota	c__Gammaproteobacteria	o__Xanthomonadales	f__Xanthomonadaceae	g__Stenotrophomonas	s__Stenotrophomonas maltophilia_AQ	d__Bacteria	4559750	66.1376	1	0	0	0	0	105	0	0	0	0
GB_GCA_943788025.1	FALSE	p__Planctomycetota	c__Planctomycetia	o__Pirellulales	f__Pirellulaceae	g__JABAAE01	s__JABAAE01 sp905480545	d__Bacteria	6724966	47.9814	0	0	0	0	0	0	0	0	0	0
RS_GCF_000745125.1	TRUE	p__Bacillota	c__Bacilli	o__Lactobacillales	f__Carnobacteriaceae	g__Carnobacterium_A	s__Carnobacterium_A jeotgali	d__Bacteria	2518244	35.4048	1	0	0	0	0	180	0	0	0	0
RS_GCF_014836905.1	TRUE	p__Bacillota	c__Bacilli	o__Bacillales_A	f__Planococcaceae	g__Solibacillus	s__Solibacillus faecavium	d__Bacteria	3823945	37.0682	1	0	0	0	0	185	0	0	0	0
RS_GCF_004375085.3	TRUE	p__Bacteroidota	c__Bacteroidia	o__Chitinophagales	f__Saprospiraceae	g__Neolewinella	s__Neolewinella sp004375085	d__Bacteria	6183643	56.32	1	0	0	0	0	98	0	0	0	0
RS_GCF_902825155.1	FALSE	p__Pseudomonadota	c__Alphaproteobacteria	o__Rhizobiales	f__Rhizobiaceae	g__Bartonella	s__Bartonella taylorii_A	d__Bacteria	2019087	38.8253	0	0	0	0	0	0	0	0	0	0
RS_GCF_900107235.1	TRUE	p__Pseudomonadota	c__Alphaproteobacteria	o__Rhodobacterales	f__Rhodobacteraceae	g__Citreimonas	s__Citreimonas salinaria	d__Bacteria	4259991	67.1475	1	0	0	0	0	189	0	0	0	0
GB_GCA_903901345.1	TRUE	p__Bacteroidota	c__Bacteroidia	o__NS11-12g	f__UKL13-3	g__JAAFJM01	s__JAAFJM01 sp903901345	d__Bacteria	3797716	31.2604	1	0	0	0	0	83	0	0	0	0
GB_GCA_022571415.1	FALSE	p__Pseudomonadota	c__Gammaproteobacteria	o__Pseudomonadales	f__Azotimanducaceae_A	g__GCA-002726655	s__GCA-002726655 sp022571415	d__Bacteria	2558498	50.6603	0	0	0	0	0	0	0	0	0	0
GB_GCA_015059185.1	TRUE	p__Bacillota_I	c__Bacilli_A	o__RFN20	f__CAG-826	g__SIG220	s__SIG220 sp015059185	d__Bacteria	1306694	34.075	1	0	0	0	0	183	0	0	0	0
RS_GCF_001659985.1	TRUE	p__Bacillota	c__Bacilli	o__Bacillales_D	f__Amphibacillaceae	g__Oceanobacillus	s__Oceanobacillus sp001659985	d__Bacteria	3715758	35.7486	1	0	0	0	0	184	0	0	0	0
GB_GCA_030531425.1	TRUE	p__Bacillota_I	c__Bacilli_A	o__RF39	f__UBA660	g__UMGS1613	s__UMGS1613 sp030531425	d__Bacteria	1315681	24.8837	1	0	0	0	0	175	0	0	0	0
GB_GCA_018061755.1	TRUE	p__Patescibacteria	c__ABY1	o__SG8-24	f__2-12-FULL-60-25	g__CAIKOH01	s__CAIKOH01 sp018061755	d__Bacteria	1152061	50.9305	1	0	0	0	0	107	0	0	0	0
RS_GCF_002999235.1	TRUE	p__Actinomycetota	c__Actinomycetes	o__Actinomycetales	f__Actinomycetaceae	g__Actinomyces	s__Actinomyces sp002999235	d__Bacteria	3249416	71.6301	1	0	0	0	0	214	0	0	0	0
RS_GCF_003711265.1	TRUE	p__Pseudomonadota	c__Gammaproteobacteria	o__PS1	f__Thioglobaceae	g__Thiodubiliella	s__Thiodubiliella sp001875585	d__Bacteria	2832685	38.569	1	0	0	0	0	97	0	0	0	0
GB_GCA_024280755.1	TRUE	p__Planctomycetota	c__Phycisphaerae	o__Phycisphaerales	f__UBA1924	g__UBA1924	s__UBA1924 sp024280755	d__Bacteria	3021696	53.203	1	1	0	0	0	102	102	0	0	0
GB_GCA_029778565.1	TRUE	p__Patescibacteria	c__Saccharimonadia	o__CAILAD01	f__CAILAD01	g__JAHFOQ01	s__JAHFOQ01 sp029778565	d__Bacteria	2248359	40.4476	1	0	0	0	0	118	0	0	0	0
GB_GCA_003574845.1	FALSE	p__NPL-UPA2	c__NPL-UPA2	o__NPL-UPA2	f__NPL-UPA2	g__NPL-UPA2	s__NPL-UPA2 sp003574845	d__Bacteria	996215	43.7406	0	0	0	0	0	0	0	0	0	0
GB_GCA_003151115.1	FALSE	p__Eremiobacterota	c__Eremiobacteria	o__Baltobacterales	f__Baltobacteraceae	g__Rubrimentiphilum	s__Rubrimentiphilum sp003151115	d__Bacteria	2555168	60.9293	0	0	0	0	0	0	0	0	0	0
RS_GCF_000423285.1	TRUE	p__Pseudomonadota	c__Gammaproteobacteria	o__Burkholderiales	f__Aquaspirillaceae	g__Laribacter	s__Laribacter hongkongensis	d__Bacteria	3110307	62.4097	1	0	0	0	0	112	0	0	0	0
RS_GCF_000308455.1	TRUE	p__Actinomycetota	c__Actinomycetes	o__Mycobacteriales	f__Mycobacteriaceae	g__Nocardia	s__Nocardia abscessus	d__Bacteria	8410401	68.1598	1	0	0	0	0	243	0	0	0	0
RS_GCF_900100885.1	TRUE	p__Actinomycetota	c__Actinomycetes	o__Actinomycetales	f__Microbacteriaceae	g__Microbacterium	s__Microbacterium pygmaeum	d__Bacteria	3668670	68.7925	1	0	0	0	0	218	0	0	0	0
RS_GCF_000146325.1	TRUE	p__Bacillota	c__Bacilli	o__Lactobacillales	f__Lactobacillaceae	g__Pediococcus	s__Pediococcus acidilactici	d__Bacteria	1942827	42.1334	1	0	0	0	0	184	0	0	0	0
RS_GCF_026278345.1	TRUE	p__Bacteroidota	c__Bacteroidia	o__Cytophagales	f__Spirosomataceae	g__Tellurirhabdus	s__Tellurirhabdus rosea	d__Bacteria	5582807	57.009	1	1	0	0	0	131	131	0	0	0
RS_GCF_003254525.1	TRUE	p__Pseudomonadota	c__Alphaproteobacteria	o__Caulobacterales	f__Caulobacteraceae	g__Phenylobacterium	s__Phenylobacterium kunshanense	d__Bacteria	4184663	69.2423	1	0	0	0	0	206	0	0	0	0
RS_GCF_003946175.1	TRUE	p__Bacillota	c__Bacilli	o__Lactobacillales	f__Lactobacillaceae	g__Lacticaseibacillus	s__Lacticaseibacillus suibinensis	d__Bacteria	2560295	53.0234	1	0	0	0	0	186	0	0	0	0
GB_GCA_026984275.1	TRUE	p__Pseudomonadota	c__Gammaproteobacteria	o__CAJXQU01	f__CAJXQU01	g__CAJXQU01	s__CAJXQU01 sp026984275	d__Bacteria	2499736	43.4833	1	0	0	0	0	108	0	0	0	0
RS_GCF_000757485.1	TRUE	p__Pseudomonadota	c__Gammaproteobacteria	o__Burkholderiales	f__Burkholderiaceae	g__Achromobacter	s__Achromobacter sp000757485	d__Bacteria	6476495	66.6183	1	0	0	0	0	112	0	0	0	0
RS_GCF_023715705.1	TRUE	p__Bacillota	c__Bacilli	o__Bacillales_H	f__Bacillaceae_D	g__Halalkalibacter	s__Halalkalibacter oceani_A	d__Bacteria	4380279	46.3655	1	0	0	0	0	183	0	0	0	0
GB_GCA_025963485.1	FALSE	p__Bacteroidota	c__Bacteroidia	o__Chitinophagales	f__LD1	g__UBA1941	s__UBA1941 sp025963485	d__Bacteria	4507400	46.9944	0	0	0	0	0	0	0	0	0	0
GB_GCA_008534395.1	TRUE	p__SZUA-79	c__SZUA-79	o__Acidulodesulfobacterales	f__Acidulodesulfobacteraceae	g__Acidulodesulfobacterium_A	s__Acidulodesulfobacterium_A acidiphilum	d__Bacteria	2093156	35.5175	1	0	0	0	0	176	0	0	0	0
GB_GCA_030695565.1	TRUE	p__Myxococcota	c__Myxococcia	o__Myxococcales	f__Myxococcaceae	g__Archangium_A	s__Archangium_A sp030695565	d__Bacteria	8515972	66.839	2	0	0	0	0	193	0	0	0	0
GB_GCA_020524245.1	TRUE	p__Bacillota	c__Bacilli	o__Bacillales_G	f__Fictibacillaceae	g__Pseudalkalibacillus	s__Pseudalkalibacillus sp020524245	d__Bacteria	3789313	42.3807	1	0	0	0	0	191	0	0	0	0
GB_GCA_018883125.1	FALSE	p__Bacteroidota	c__Kapaibacteriia	o__Kapaibacteriales	f__Kapaibacteriaceae	g__UBA10438	s__UBA10438 sp018883125	d__Bacteria	2901579	55.3655	0	0	0	0	0	0	0	0	0	0
GB_GCA_016716005.1	TRUE	p__Actinomycetota	c__Acidimicrobiia	o__Acidimicrobiales	f__JADJXE01	g__JADJXE01	s__JADJXE01 sp016716005	d__Bacteria	3786270	73.8797	1	0	0	0	0	185	0	0	0	0
GB_GCA_910584875.1	TRUE	p__Bacillota_A	c__Clostridia	o__Lachnospirales	f__Lachnospiraceae	g__Eubacterium_F	s__Eubacterium_F sp910584875	d__Bacteria	3003107	46.474	1	0	0	0	0	175	0	0	0	0
RS_GCF_019977655.1	TRUE	p__Bacillota_A	c__Clostridia	o__Clostridiales	f__Clostridiaceae	g__Clostridium	s__Clostridium gelidum	d__Bacteria	6041432	29.0391	1	0	0	0	0	177	0	0	0	0
RS_GCF_028331445.1	TRUE	p__Pseudomonadota	c__Alphaproteobacteria	o__Rhizobiales	f__Rhizobiaceae	g__Phyllobacterium	s__Phyllobacterium sp028331445	d__Bacteria	6010116	56.3684	1	0	0	0	0	197	0	0	0	0
GB_GCA_900316125.1	TRUE	p__Bacteroidota	c__Bacteroidia	o__Bacteroidales	f__Paludibacteraceae	g__Enterocola	s__Enterocola sp900316125	d__Bacteria	2068327	44.8631	1	0	0	0	0	96	0	0	0	0
GB_GCA_001816475.1	FALSE	p__Patescibacteria	c__Microgenomatia	o__GWA2-44-7	f__UBA10165	g__UBA10165	s__UBA10165 sp001816475	d__Bacteria	958425	39.5805	0	0	0	0	0	0	0	0	0	0
RS_GCF_900046475.1	TRUE	p__Actinomycetota	c__Coriobacteriia	o__Coriobacteriales	f__Coriobacteriaceae	g__Collinsella	s__Collinsella ihumii	d__Bacteria	2836446	64.1285	1	0	0	0	0	194	0	0	0	0
RS_GCF_001544095.1	TRUE	p__Bacillota	c__Bacilli	o__Lactobacillales	f__Enterococcaceae	g__Enterococcus_D	s__Enterococcus_D casseliflavus	d__Bacteria	3498264	42.3524	1	0	0	0	0	185	0	0	0	0
RS_GCF_009720655.1	TRUE	p__Pseudomonadota	c__Alphaproteobacteria	o__Rhizobiales	f__Beijerinckiaceae	g__Rhodoblastus	s__Rhodoblastus acidophilus_A	d__Bacteria	4357059	64.1152	1	0	0	0	0	196	0	0	0	0
GB_GCA_944324825.1	TRUE	p__Cyanobacteriota	c__Vampirovibrionia	o__Gastranaerophilales	f__Gastranaerophilaceae	g__UMGS1585	s__UMGS1585 sp944324825	d__Bacteria	2121720	34.749	1	0	0	0	0	129	0	0	0	0
RS_GCF_000172175.1	TRUE	p__Bacteroidota	c__Bacteroidia	o__Bacteroidales	f__Bacteroidaceae	g__Bacteroides	s__Bacteroides intestinalis	d__Bacteria	6052596	42.8089	1	0	0	0	0	99	0	0	0	0
RS_GCF_025574465.1	TRUE	p__Pseudomonadota	c__Alphaproteobacteria	o__Sphingomonadales	f__Kordiimonadaceae	g__Kordiimonas	s__Kordiimonas aestuarii	d__Bacteria	4102882	56.2597	1	0	0	0	0	193	0	0	0	0
GB_GCA_002167745.1	TRUE	p__Pseudomonadota	c__Gammaproteobacteria	o__Burkholderiales	f__UBA3031	g__UBA3031	s__UBA3031 sp002167745	d__Bacteria	1881163	44.1199	1	0	0	0	0	110	0	0	0	0
GB_GCA_018883545.1	TRUE	p__Bacteroidota	c__Bacteroidia	o__Flavobacteriales	f__Flavobacteriaceae	g__Confluentibacter	s__Confluentibacter sp018883545	d__Bacteria	3134388	35.5232	2	1	0	0	0	100	99	0	0	0
RS_GCF_008364245.1	TRUE	p__Pseudomonadota	c__Gammaproteobacteria	o__Enterobacterales	f__Enterobacteriaceae	g__Serratia	s__Serratia nevei	d__Bacteria	5421591	59.4919	1	1	0	0	0	95	113	0	0	0
RS_GCF_014048475.1	FALSE	p__Pseudomonadota	c__Alphaproteobacteria	o__Acetobacterales	f__Acetobacteraceae	g__Bombella	s__Bombella favorum	d__Bacteria	1975894	55.3307	0	0	0	0	0	0	0	0	0	0
RS_GCF_004376175.1	TRUE	p__Bacillota	c__Bacilli	o__Bacillales_H	f__Bacillaceae_D	g__Halalkalibacterium	s__Halalkalibacterium halodurans	d__Bacteria	4191775	43.212	1	0	0	0	0	187	0	0	0	0
GB_GCA_020440705.1	TRUE	p__Krumholzibacteriota	c__Krumholzibacteria	o__LZORAL124-64-63	f__LZORAL124-64-63	g__JAGRNP01	s__JAGRNP01 sp020440705	d__Bacteria	4355677	70.4944	1	0	0	0	0	178	0	0	0	0
GB_GCA_016873995.1	FALSE	p__Gemmatimonadota	c__Gemmatimonadetes	o__Longimicrobiales	f__UBA6960	g__UBA2982	s__UBA2982 sp016873995	d__Bacteria	3374563	68.3814	0	0	0	0	0	0	0	0	0	0
GB_GCA_009782215.1	FALSE	p__Bacillota_A	c__Clostridia	o__Oscillospirales	f__UBA929	g__UBA929	s__UBA929 sp009782215	d__Bacteria	2355007	58.2105	0	0	0	0	0	0	0	0	0	0
GB_GCA_022508445.1	TRUE	p__Bacillota_A	c__Clostridia	o__Christensenellales	f__Pumilibacteraceae	g__Anaerocaecibacter	s__Anaerocaecibacter sp022508445	d__Bacteria	1779580	48.76	1	0	0	0	0	181	0	0	0	0
GB_GCA_003565295.1	TRUE	p__Bacteroidota	c__Bacteroidia	o__Cytophagales	f__Cyclobacteriaceae	g__Pleomorphovibrio	s__Pleomorphovibrio sp003565295	d__Bacteria	5619195	44.0216	1	1	0	0	0	97	102	0	0	0
GB_GCA_021162585.1	TRUE	p__Desulfobacterota	c__Desulfomonilia	o__UBA1062	f__UBA1062	g__JAGGYK01	s__JAGGYK01 sp021162585	d__Bacteria	2763580	42.1745	1	0	0	0	0	175	0	0	0	0
RS_GCF_000011705.1	TRUE	p__Pseudomonadota	c__Gammaproteobacteria	o__Burkholderiales	f__Burkholderiaceae	g__Burkholderia	s__Burkholderia mallei	d__Bacteria	5835527	68.4855	1	0	0	0	0	119	0	0	0	0
RS_GCF_019334345.1	TRUE	p__Pseudomonadota	c__Alphaproteobacteria	o__Rhizobiales	f__Rhizobiaceae	g__Pseudohoeflea	s__Pseudohoeflea sp019334345	d__Bacteria	3929092	62.6572	1	0	0	0	0	189	0	0	0	0
RS_GCF_014650955.1	TRUE	p__Actinomycetota	c__Actinomycetes	o__Streptomycetales	f__Streptomycetaceae	g__Streptomyces	s__Streptomyces tauricus	d__Bacteria	9713444	70.8252	1	0	0	0	0	230	0	0	0	0
RS_GCF_021991875.1	TRUE	p__Pseudomonadota	c__Gammaproteobacteria	o__Burkholderiales	f__Burkholderiaceae	g__Mycetohabitans	s__Mycetohabitans sp021991875	d__Bacteria	3281035	61.1655	1	0	0	0	0	116	0	0	0	0
RS_GCF_000426725.1	TRUE	p__Bacteroidota	c__Bacteroidia	o__Cytophagales	f__Cytophagaceae	g__Sporocytophaga	s__Sporocytophaga myxococcoides	d__Bacteria	6344326	36.1087	1	0	0	0	0	99	0	0	0	0
GB_GCA_937128795.1	FALSE	p__Actinomycetota	c__Thermoleophilia	o__Solirubrobacterales	f__JACPNS01	g__JACPNS01	s__JACPNS01 sp937128795	d__Bacteria	2425208	61.9026	0	0	0	0	0	0	0	0	0	0
RS_GCF_015207035.1	TRUE	p__Cyanobacteriota	c__Cyanobacteriia	o__Leptolyngbyales	f__Leptolyngbyaceae	g__Romeriopsis	s__Romeriopsis navalis	d__Bacteria	6469551	50.5959	1	0	0	0	0	215	0	0	0	0
RS_GCF_025567315.1	TRUE	p__Bacillota_A	c__Clostridia	o__Oscillospirales	f__Butyricicoccaceae	g__Agathobaculum	s__Agathobaculum ammoniilyticum	d__Bacteria	2999081	57.0955	1	0	0	0	0	175	0	0	0	0
RS_GCF_031157355.1	FALSE	p__Pseudomonadota	c__Alphaproteobacteria	o__Rhizobiales	f__Hyphomicrobiaceae	g__Hyphomicrobium_C	s__Hyphomicrobium_C sp031157355	d__Bacteria	4292870	62.6334	0	0	0	0	0	0	0	0	0	0
RS_GCF_001042485.2	TRUE	p__Bacillota	c__Bacilli	o__Bacillales	f__Bacillaceae	g__Bacillus	s__Bacillus paralicheniformis	d__Bacteria	4520660	45.7614	1	0	0	0	0	186	0	0	0	0
RS_GCF_000312005.1	TRUE	p__Actinomycetota	c__Actinomycetes	o__Actinomycetales	f__Cellulomonadaceae	g__Cellulomonas	s__Cellulomonas massiliensis	d__Bacteria	3410512	74.8415	1	0	0	0	0	217	0	0	0	0
RS_GCF_004210295.1	TRUE	p__Bacillota	c__Bacilli	o__Lactobacillales	f__Streptococcaceae	g__Lactococcus	s__Lactococcus sp004210295	d__Bacteria	2273230	39.3654	1	0	0	0	0	185	0	0	0	0
RS_GCF_000498355.1	TRUE	p__Bacillota_A	c__Clostridia	o__Clostridiales	f__Clostridiaceae	g__Clostridium	s__Clostridium sp000498355	d__Bacteria	3113901	26.7462	1	0	0	0	0	175	0	0	0	0
RS_GCF_020532705.1	TRUE	p__Pseudomonadota	c__Gammaproteobacteria	o__Burkholderiales	f__Methylophilaceae	g__Methylobacillus	s__Methylobacillus caricis	d__Bacteria	2969918	51.7413	1	0	0	0	0	108	0	0	0	0
GB_GCA_018665815.1	TRUE	p__Pseudomonadota	c__Alphaproteobacteria	o__Rhodospirillales_A	f__Casp-alpha2	g__UBA3470	s__UBA3470 sp018665815	d__Bacteria	3893358	56.7405	1	0	0	0	0	190	0	0	0	0
RS_GCF_020037015.1	TRUE	p__Myxococcota	c__Myxococcia	o__Myxococcales	f__Myxococcaceae	g__Corallococcus	s__Corallococcus sp020037015	d__Bacteria	9503344	70.7482	2	0	0	0	0	218	0	0	0	0
GB_GCA_030539055.1	TRUE	p__Bacillota_A	c__Clostridia	o__Lachnospirales	f__Lachnospiraceae	g__UBA3633	s__UBA3633 sp030539055	d__Bacteria	1513967	27.4886	1	0	0	0	0	179	0	0	0	0
GB_GCA_900546265.1	TRUE	p__Bacillota_A	c__Clostridia	o__Oscillospirales	f__Acutalibacteraceae	g__UMGS856	s__UMGS856 sp900546265	d__Bacteria	3701038	58.6593	1	0	0	0	0	177	0	0	0	0
GB_GCA_016931415.1	TRUE	p__JABMQX01	c__JABMQX01	o__JABMQX01	f__JAFGEW01	g__JAFGEW01	s__JAFGEW01 sp016931415	d__Bacteria	4055620	65.3449	1	0	0	0	0	150	0	0	0	0
GB_GCA_003281455.1	TRUE	p__Cyanobacteriota	c__Cyanobacteriia	o__PCC-6307	f__Cyanobiaceae	g__Prochlorococcus_A	s__Prochlorococcus_A sp003281455	d__Bacteria	1421082	31.5279	1	0	0	0	0	194	0	0	0	0
GB_GCA_958295945.1	TRUE	p__Poribacteria	c__WGA-4E	o__WGA-4E	f__WGA-3G	g__MSPOR6	s__MSPOR6 sp958295945	d__Bacteria	5337261	40.8334	1	0	0	0	0	185	0	0	0	0
RS_GCF_001594225.2	TRUE	p__Pseudomonadota	c__Gammaproteobacteria	o__Pseudomonadales	f__Pseudomonadaceae	g__Pseudomonas_E	s__Pseudomonas_E glycinae	d__Bacteria	6396728	60.4786	1	0	1	0	0	102	0	71	0	0
RS_GCF_000014565.1	TRUE	p__Actinomycetota	c__Actinomycetes	o__Mycobacteriales	f__Mycobacteriaceae	g__Rhodococcus	s__Rhodococcus jostii_A	d__Bacteria	9702737	66.9813	1	0	0	0	0	225	0	0	0	0
RS_GCF_019550795.1	TRUE	p__Bacillota	c__Bacilli	o__Paenibacillales	f__Paenibacillaceae	g__Paenibacillus_Z	s__Paenibacillus_Z sp019550795	d__Bacteria	6100890	50.117	1	0	0	0	0	182	0	0	0	0
GB_GCA_016861045.1	TRUE	p__Actinomycetota	c__Thermoleophilia	o__Solirubrobacterales	f__70-9	g__RHKX01	s__RHKX01 sp008363375	d__Bacteria	2703079	72.985	1	0	0	0	0	115	0	0	0	0
RS_GCF_030818575.1	TRUE	p__Bacteroidota	c__Bacteroidia	o__Flavobacteriales	f__Weeksellaceae	g__Chryseobacterium	s__Chryseobacterium camelliae_A	d__Bacteria	4187050	40.8205	1	0	0	0	0	96	0	0	0	0
RS_GCF_000188015.2	TRUE	p__Bacillota	c__Bacilli	o__Lactobacillales	f__Streptococcaceae	g__Streptococcus	s__Streptococcus ictaluri	d__Bacteria	2234402	38.1647	1	0	0	0	0	182	0	0	0	0
RS_GCF_000334455.1	TRUE	p__Actinomycetota	c__Actinomycetes	o__Mycobacteriales	f__Mycobacteriaceae	g__Gordonia	s__Gordonia soli	d__Bacteria	5375815	67.656	1	0	0	0	0	270	0	0	0	0
RS_GCF_000347035.1	TRUE	p__Spirochaetota	c__Leptospirae	o__Leptospirales	f__Leptospiraceae	g__Leptospira_B	s__Leptospira_B sp000347035	d__Bacteria	4180037	41.6551	1	0	0	0	0	95	0	0	0	0
GB_GCA_014642275.1	TRUE	p__Bacteroidota	c__Bacteroidia	o__Flavobacteriales	f__Flavobacteriaceae	g__Flavobacterium	s__Flavobacterium lutivivi	d__Bacteria	2872468	32.3957	1	0	0	0	0	100	0	0	0	0
RS_GCF_002836745.1	TRUE	p__Pseudomonadota	c__Gammaproteobacteria	o__Enterobacterales	f__Alteromonadaceae	g__Glaciecola	s__Glaciecola sp002836745	d__Bacteria	4517900	41.2759	1	1	1	0	0	95	118	58	0	0
GB_GCA_030622955.1	TRUE	p__Verrucomicrobiota	c__Kiritimatiellia	o__JAUXFM01	f__JAUXFM01	g__JAUXFM01	s__JAUXFM01 sp030622955	d__Bacteria	2652544	52.5879	1	0	0	0	0	118	0	0	0	0
GB_GCA_012517545.1	TRUE	p__Spirochaetota	c__JAAYUW01	o__JAAYUW01	f__JAAYUW01	g__Exilispira	s__Exilispira sp012517545	d__Bacteria	2358896	30.4271	1	0	0	0	0	256	0	0	0	0
RS_GCF_024448335.1	TRUE	p__Pseudomonadota	c__Gammaproteobacteria	o__Pseudomonadales	f__Pseudomonadaceae	g__Stutzerimonas	s__Stutzerimonas frequens	d__Bacteria	4379993	63.5852	1	0	1	0	0	102	0	71	0	0
GB_GCA_028715905.1	TRUE	p__Verrucomicrobiota	c__Kiritimatiellia	o__JAAZAB01	f__JAAZAB01	g__JAQUQV01	s__JAQUQV01 sp028715905	d__Bacteria	2669920	55.5191	1	0	0	0	0	117	0	0	0	0
GB_GCA_003260325.1	FALSE	p__Patescibacteria	c__JAEDAM01	o__BD1-5	f__UBA6164	g__GN02-872	s__GN02-872 sp003260325	d__Bacteria	1044027	25.0813	0	0	0	0	0	0	0	0	0	0
GB_GCA_002773725.1	TRUE	p__Patescibacteria	c__Paceibacteria	o__UBA6257	f__Colwellbacteraceae	g__1-14-0-10-42-22	s__1-14-0-10-42-22 sp002773725	d__Bacteria	550819	42.0289	1	0	0	0	0	102	0	0	0	0
GB_GCA_002166865.1	TRUE	p__Pseudomonadota	c__Alphaproteobacteria	o__Rhodobacterales	f__Rhodobacteraceae	g__Roseovarius	s__Roseovarius sp002166865	d__Bacteria	3361844	67.5355	1	0	0	0	0	187	0	0	0	0
RS_GCF_002072155.1	TRUE	p__Pseudomonadota	c__Alphaproteobacteria	o__Rhodobacterales	f__Rhodobacteraceae	g__Roseovarius	s__Roseovarius sp002072155	d__Bacteria	4584578	62.8313	1	0	0	0	0	187	0	0	0	0
RS_GCF_000308655.1	TRUE	p__Actinomycetota	c__Actinomycetes	o__Mycobacteriales	f__Mycobacteriaceae	g__Nocardia	s__Nocardia niigatensis	d__Bacteria	8224214	68.2256	1	0	0	0	0	239	0	0	0	0
RS_GCF_000153825.1	TRUE	p__Cyanobacteriota	c__Cyanobacteriia	o__PCC-6307	f__Cyanobiaceae	g__Synechococcus_C	s__Synechococcus_C sp000153825	d__Bacteria	2664873	59.8072	1	0	0	0	0	195	0	0	0	0
RS_GCF_004345785.1	FALSE	p__Pseudomonadota	c__Gammaproteobacteria	o__Enterobacterales	f__Pasteurellaceae	g__Bisgaardia	s__Bisgaardia hudsonensis	d__Bacteria	2108978	33.467	0	0	0	0	0	0	0	0	0	0
[truncated: 44,016 more rows]

## Sheet: RMF for operon analyses
Entry	Entry Name	Protein names	Gene Names	Organism	Length
A0A845SGB7	A0A845SGB7_9GAMM	Ribosome modulation factor (RMF)	rmf GRH90_04365	Acerihabitans arboris	55
F3KZ23	F3KZ23_9GAMM	Ribosome modulation factor	IMCC3088_89	Aequoribacter fuscus	67
A0AAQ3C059	A0AAQ3C059_9GAMM	Ribosome modulation factor	rmf C3Y05_013765	Aeromonas allosaccharophila	58
A0AAP4JBJ6	A0AAP4JBJ6_9GAMM	Ribosome modulation factor	rmf OB947_07370	Aeromonas bestiarum	58
A0A2H9U3R5	A0A2H9U3R5_9GAMM	Ribosome modulation factor (RMF)	rmf CUC53_11405	Aeromonas cavernicola	58
A0A3G9IM72	A0A3G9IM72_AERCA	Ribosome modulation factor (RMF)	rmf C1C91_18935 JC965_04965 KAM348_15890 KAM351_25320 KAM354_03020 KAM379_10340	Aeromonas caviae (Aeromonas punctata)	59
N9VGH5	N9VGH5_9GAMM	Ribosome modulation factor (RMF)	rmf G114_17065	Aeromonas diversa CDC 2478-85	60
A0AAE9MLM6	A0AAE9MLM6_9GAMM	Ribosome modulation factor (RMF)	rmf NHF51_09660	Aeromonas encheleia	58
A0A926FNY5	A0A926FNY5_AERHY	Ribosome modulation factor	H2136_19820	Aeromonas hydrophila	50
A0A2S5FHS3	A0A2S5FHS3_AERJA	Ribosome modulation factor (RMF)	rmf C3737_06355 EHZ47_16635	Aeromonas jandaei	58
A0A2M8HEG4	A0A2M8HEG4_9GAMM	Ribosome modulation factor (RMF)	rmf CUC44_01770	Aeromonas lusitana	58
A0A6M4YY25	A0A6M4YY25_AERME	Ribosome modulation factor (RMF)	rmf E4184_11545 E4186_11195 GWI30_11230 SJS82_15520	Aeromonas media	58
R1H727	R1H727_9GAMM	Ribosome modulation factor (RMF)	rmf G113_15196	Aeromonas molluscorum 848	58
A0AAP6SXG5	A0AAP6SXG5_9GAMM	Ribosome modulation factor	rmf G4923_08855 OB930_03565	Aeromonas rivipollensis	58
A0AAQ0W165	A0AAQ0W165_AERSA	Ribosome modulation factor	rmf C5B78_03175 NBL15_05355	Aeromonas salmonicida	58
A0A5J6WXY6	A0A5J6WXY6_9GAMM	Ribosome modulation factor (RMF)	rmf FE240_08340	Aeromonas simiae	58
A0A2N3IXG6	A0A2N3IXG6_AERSO	Ribosome modulation factor (RMF)	rmf CJP16_11650	Aeromonas sobria	58
A0A5F0KGK4	A0A5F0KGK4_9GAMM	Ribosome modulation factor (RMF)	rmf DRM94_01295	Aeromonas taiwanensis	58
A0A167SLJ4	A0A167SLJ4_AERVE	Ribosome modulation factor (RMF)	rmf BTN33_00940 CIG16_17625 D6R50_03490 DAA48_07270 E8Q35_11420 EFI48_11120 ELS78_01015 WM43_01705	Aeromonas veronii	58
K1IJ21	K1IJ21_AERVE	Ribosome modulation factor (RMF)	rmf HMPREF1168_02839	Aeromonas veronii AMC34	59
A0A9E5JXL6	A0A9E5JXL6_9GAMM	Ribosome modulation factor (RMF)	rmf G8770_13010	Aestuariicella hydrocarbonica	67
A0A3P3VVJ1	A0A3P3VVJ1_9GAMM	Ribosome modulation factor (RMF)	rmf D0544_07095	Aestuariirhabdus litorea	68
A0A5J5G371	A0A5J5G371_9GAMM	Ribosome modulation factor (RMF)	rmf FJU30_07835	Affinibrenneria salicis	55
A0AA37SYD4	A0AA37SYD4_9ALTE	Ribosome modulation factor	rmf GCM10007852_10290	Agaribacter marinus	50
A0A1H3EPU2	A0A1H3EPU2_9GAMM	Ribosome modulation factor (RMF)	rmf SAMN05443545_107187	Aidingimonas halophila	68
L0WEX5	L0WEX5_9GAMM	Ribosome modulation factor	A11A3_04820	Alcanivorax hongdengensis A-11-3	51
A0A095SJR3	A0A095SJR3_9GAMM	Ribosome modulation factor	Y5S_01730	Alcanivorax nanhaiticus	64
A0A418XUN8	A0A418XUN8_9GAMM	Ribosome modulation factor	D4A39_14215	Alcanivorax profundi	64
A0A6N7LPD0	A0A6N7LPD0_9GAMM	Ribosome modulation factor	GFN93_01140	Alcanivorax sediminis	64
A0A552X3Y1	A0A552X3Y1_9GAMM	Ribosome modulation factor (RMF)	rmf FM042_02455	Aliidiomarina halalkaliphila	58
A0A432VYB6	A0A432VYB6_9GAMM	Ribosome modulation factor (RMF)	rmf CWE06_02050	Aliidiomarina haloalkalitolerans	58
A0A432W089	A0A432W089_9GAMM	Ribosome modulation factor (RMF)	rmf CWE08_04210	Aliidiomarina iranensis	58
A0A327X210	A0A327X210_9GAMM	Ribosome modulation factor (RMF)	rmf B0I24_104136	Aliidiomarina maris	57
A0A432W6P0	A0A432W6P0_9GAMM	Ribosome modulation factor (RMF)	rmf CWE09_02940	Aliidiomarina minuta	58
A0A432WRT9	A0A432WRT9_9GAMM	Ribosome modulation factor (RMF)	rmf CWE11_01360	Aliidiomarina sanyensis	58
A0A432WX50	A0A432WX50_9GAMM	Ribosome modulation factor (RMF)	rmf CWE13_01475	Aliidiomarina shirensis	58
A0A432WMD4	A0A432WMD4_9GAMM	Ribosome modulation factor (RMF)	rmf CWE14_02870	Aliidiomarina soli	57
A0A432XAN0	A0A432XAN0_9GAMM	Ribosome modulation factor (RMF)	rmf CWE15_03015	Aliidiomarina taiwanensis	58
K6YU72	K6YU72_9ALTE	Ribosome modulation factor (RMF)	rmf GLIP_2172	Aliiglaciecola lipolytica E3	58
A0A545UD17	A0A545UD17_9GAMM	Ribosome modulation factor (RMF)	rmf FLL46_12970	Aliikangiella coralliicola	57
A0A545TJS3	A0A545TJS3_9GAMM	Ribosome modulation factor (RMF)	rmf FLL45_05810	Aliikangiella marina	57
A0A4Q5KJ98	A0A4Q5KJ98_9GAMM	Ribosome modulation factor (RMF)	rmf ERW49_09445 ERW57_06595	Aliivibrio finisterrensis	57
A0A1B9PBT2	A0A1B9PBT2_ALIFS	Ribosome modulation factor (RMF)	rmf A6D98_00095 A6E02_09925 AFI02nite_10010 GNP77_02880 GNP84_13710 GNP88_17590	Aliivibrio fischeri (Vibrio fischeri)	57
A0A1B9P0C8	A0A1B9P0C8_ALILO	Ribosome modulation factor (RMF)	rmf A6E04_08135	Aliivibrio logei (Vibrio logei)	57
A0A2S7XDI0	A0A2S7XDI0_9GAMM	Ribosome modulation factor (RMF)	rmf BTO22_06060 BTO23_05150	Aliivibrio sifiae	57
A0A090IL41	A0A090IL41_9GAMM	Ribosome modulation factor (RMF)	rmf AWOD_I_1379	Aliivibrio wodanis	57
J1YC98	J1YC98_9ALTE	Ribosome modulation factor (RMF)	rmf AEST_18140	Alishewanella aestuarii B11	60
I9P4Z6	I9P4Z6_9ALTE	Ribosome modulation factor (RMF)	rmf AGRI_02730	Alishewanella agri BL06	60
H3Z9V6	H3Z9V6_9ALTE	Ribosome modulation factor (RMF)	rmf AJE_00535	Alishewanella jeotgali KCTC 22429	60
A0A9E8KNQ1	A0A9E8KNQ1_9ALTE	Ribosome modulation factor	NNL22_16510	Alkalimarinus sediminis	66
A0A1H3Z6P9	A0A1H3Z6P9_ALKAM	Ribosome modulation factor (RMF)	rmf SAMN04488051_10254	Alkalimonas amylolytica	60
A0A9Q3UPA1	A0A9Q3UPA1_9GAMM	Ribosome modulation factor	LL252_15055	Alloalcanivorax marinus	67
A0A9Q3ZBZ1	A0A9Q3ZBZ1_9GAMM	Ribosome modulation factor (RMF)	rmf LZG35_03820	Alloalcanivorax xenomutans	68
A0A1H6T7C8	A0A1H6T7C8_9GAMM	Ribosome modulation factor (RMF)	rmf SAMN05421831_10995	Allopseudospirillum japonicum	68
A0A3D8M8N4	A0A3D8M8N4_9ALTE	Ribosome modulation factor (RMF)	rmf DXV75_07690	Alteromonas aestuariivivens	58
A0A2S9V5B2	A0A2S9V5B2_9ALTE	Ribosome modulation factor (RMF)	rmf C6Y40_21010	Alteromonas alba	58
A0A075NZN8	A0A075NZN8_9ALTE	Ribosome modulation factor (RMF)	rmf DCW74_05080 DEB45_17805 EP13_10070	Alteromonas australica	58
A0A1E7ZDE4	A0A1E7ZDE4_9ALTE	Ribosome modulation factor (RMF)	rmf BFC18_08050	Alteromonas confluentis	58
A0A6N9TEM7	A0A6N9TEM7_9ALTE	Ribosome modulation factor (RMF)	rmf GTQ48_08750	Alteromonas genovensis	58
A0A918JLP4	A0A918JLP4_9ALTE	Ribosome modulation factor (RMF)	rmf GCM10007391_23270	Alteromonas halophila	58
A0A6L9MQB9	A0A6L9MQB9_9ALTE	Ribosome modulation factor (RMF)	rmf GTW09_00725	Alteromonas hispanica	58
A0A126PZP1	A0A126PZP1_ALTMA	Ribosome modulation factor (RMF)	rmf ALTBGP6_02090 AVL55_10150 BFV94_2107	Alteromonas macleodii (Pseudoalteromonas macleodii)	58
A0A0B3XTR0	A0A0B3XTR0_9ALTE	Ribosome modulation factor (RMF)	rmf RJ41_10255	Alteromonas marina	58
A0AAC9JCE8	A0AAC9JCE8_9ALTE	Ribosome modulation factor (RMF)	rmf AV942_10620 BM524_09450	Alteromonas mediterranea	58
S5AFW1	S5AFW1_9ALTE	Ribosome modulation factor (RMF)	rmf I633_10870	Alteromonas mediterranea 615	58
F5Z7V5	RMF_ALTNA	Ribosome modulation factor (RMF)	rmf ambt_08100	Alteromonas naphthalenivorans	58
A0A6M4MHM9	A0A6M4MHM9_9ALTE	Ribosome modulation factor (RMF)	rmf CA267_018605	Alteromonas pelagimontana	58
A0A4U0ZCA6	A0A4U0ZCA6_9ALTE	Ribosome modulation factor (RMF)	rmf E5672_07120	Alteromonas portus	58
A0A7X5LLR1	A0A7X5LLR1_9ALTE	Ribosome modulation factor (RMF)	rmf GTH32_08740	Alteromonas profundi	58
A0A3N5Y3G3	A0A3N5Y3G3_9ALTE	Ribosome modulation factor (RMF)	rmf DRW07_07400	Alteromonas sediminis	58
A0A1H9HWB8	A0A1H9HWB8_9GAMM	Ribosome modulation factor	SAMN03080615_02264	Amphritea atlantica	68
A0A3P1STZ6	A0A3P1STZ6_9GAMM	Ribosome modulation factor (RMF)	rmf EHS89_05590	Amphritea balenae	68
A0A7R6PKD3	A0A7R6PKD3_9GAMM	Ribosome modulation factor (RMF)	rmf AMJAP_1375	Amphritea japonica ATCC BAA-1530	68
A0A430KSF8	A0A430KSF8_9GAMM	Ribosome modulation factor	EH243_07480	Amphritea opalescens	68
A0A447LM27	A0A447LM27_ATLHE	Ribosome modulation factor (RMF)	rmf NCTC12129_01880	Atlantibacter hermannii (Escherichia hermannii)	55
H5UWZ9	H5UWZ9_ATLHE	Ribosome modulation factor (RMF)	rmf EH105704_01_04400	Atlantibacter hermannii NBRC 105704	55
A0A427V6Z6	A0A427V6Z6_9ENTR	Ribosome modulation factor (RMF)	rmf EGT71_02980	Atlantibacter subterranea	55
A0A1H7GWV4	A0A1H7GWV4_9GAMM	Ribosome modulation factor (RMF)	rmf SAMN05216214_102214	Atopomonas hussainii	71
A0A6L9MH07	A0A6L9MH07_9HYPH	Ribosome modulation factor	GTW51_10415	Aurantimonas aggregata	73
A0A7W6HF93	A0A7W6HF93_9HYPH	Ribosome modulation factor	GGR03_003015	Aurantimonas endophytica	73
A0A9X2KDA5	A0A9X2KDA5_9HYPH	Ribosome modulation factor	MJ956_03365	Aurantimonas marianensis	74
A0A917E1G7	A0A917E1G7_9HYPH	Ribosome modulation factor	GCM10011390_12600	Aureimonas endophytica	94
A0A3A1WP74	A0A3A1WP74_9HYPH	Ribosome modulation factor	D3218_17815	Aureimonas flava	62
A0A5B0E0D3	A0A5B0E0D3_9HYPH	Ribosome modulation factor	FPY71_05420	Aureimonas fodinaquatilis	90
A0A916XTA7	A0A916XTA7_9HYPH	Ribosome modulation factor	GCM10011335_06230	Aureimonas glaciei	62
A0A7V7PSE1	A0A7V7PSE1_9HYPH	Ribosome modulation factor	F6X38_04525	Aureimonas leprariae	68
A0A7W6FVH7	A0A7W6FVH7_9HYPH	Ribosome modulation factor	GGR05_003306	Aureimonas phyllosphaerae	61
A0A7W6EEX2	A0A7W6EEX2_9HYPH	Ribosome modulation factor	GGR04_001216	Aureimonas pseudogalii	62
A0A175RCU9	A0A175RCU9_9HYPH	Ribosome modulation factor	NS226_00835	Aureimonas ureilytica	70
A0A562HZR1	A0A562HZR1_9GAMM	Ribosome modulation factor (RMF)	rmf LX59_02972	Azomonas agilis	71
A0A839SW88	A0A839SW88_AZOMA	Ribosome modulation factor (RMF)	rmf FHR87_000027	Azomonas macrocytogenes (Azotobacter macrocytogenes)	71
A0A1H6X3Q1	A0A1H6X3Q1_9GAMM	Ribosome modulation factor (RMF)	rmf SAMN04244572_02930 SAMN04244573_03177 SAMN04244574_01834 SAMN04244579_03610	Azotobacter beijerinckii	71
A0AAQ0BXH1	A0AAQ0BXH1_9GAMM	Ribosome modulation factor	rmf GKQ51_14455	Azotobacter chroococcum	71
A0A0C4WHF8	A0A0C4WHF8_9GAMM	Ribosome modulation factor (RMF)	rmf Achr_14670	Azotobacter chroococcum NCIMB 8003	71
M9YPL5	M9YPL5_AZOVI	Ribosome modulation factor	AvCA6_18910	Azotobacter vinelandii CA6	63
A0A222FLH9	A0A222FLH9_9GAMM	Ribosome modulation factor	CHH28_13475	Bacterioplanes sanyensis	64
Q1MYZ8	Q1MYZ8_9GAMM	Ribosome modulation factor	RED65_07374	Bermanella marisrubri	66
A0A7T1Y6I3	A0A7T1Y6I3_9GAMM	Ribosome modulation factor (RMF)	rmf I4484_07400	Billgrantia campisalis	68
A0A2N7U4T9	A0A2N7U4T9_9GAMM	Ribosome modulation factor (RMF)	rmf C1H69_09480	Billgrantia endophytica	68
A0A1G8MWJ3	A0A1G8MWJ3_9GAMM	Ribosome modulation factor (RMF)	rmf SAMN04487954_101141	Billgrantia gudaonensis	68
A0A7V9W1Q4	A0A7V9W1Q4_9GAMM	Ribosome modulation factor (RMF)	rmf H1D44_11155	Billgrantia kenyensis	68
A0A368U173	A0A368U173_9GAMM	Ribosome modulation factor (RMF)	rmf DU505_09480	Billgrantia montanilacus	68
A0A7V7FY75	A0A7V7FY75_9GAMM	Ribosome modulation factor (RMF)	rmf F0A17_14265	Billgrantia pellis	68
A0A6I6SMD1	A0A6I6SMD1_9GAMM	Ribosome modulation factor (RMF)	rmf EKK97_07985	Billgrantia tianxiuensis	68
A0A645FER0	A0A645FER0_9ZZZZ	Ribosome modulation factor	rmf SDC9_160198	bioreactor metagenome	55
A0A510XCM8	A0A510XCM8_9GAMM	Ribosome modulation factor (RMF)	rmf HPA02_34510	Bisbaumannia pacifica	68
A0A0H5BCE3	A0A0H5BCE3_BLAVI	Ribosome modulation factor	BV133_2267 BVIRIDIS_18870	Blastochloris viridis (Rhodopseudomonas viridis)	59
A0A939DL92	A0A939DL92_9ALTE	Ribosome modulation factor (RMF)	rmf J0A66_03910	Bowmanella dokdonensis	58
A0A2U1U6G8	A0A2U1U6G8_9GAMM	Ribosome modulation factor (RMF)	rmf DDT56_06895	Brenneria corticis	55
A0AA41XZ66	A0AA41XZ66_9GAMM	Ribosome modulation factor (RMF)	rmf NC803_15995	Brenneria izbisi	55
A0A2U1UUF2	A0A2U1UUF2_9GAMM	Ribosome modulation factor (RMF)	rmf DDT54_04745	Brenneria nigrifluens DSM 30175 = ATCC 13028	55
A0A4P8QNR8	A0A4P8QNR8_9GAMM	Ribosome modulation factor (RMF)	rmf EH207_09865	Brenneria rubrifaciens	56
A0A366I453	A0A366I453_9GAMM	Ribosome modulation factor (RMF)	rmf DES54_11568	Brenneria salicis ATCC 15712 = DSM 30166	55
A0A9E7N484	A0A9E7N484_9CAUD	Ribosome modulation factor	BAMBUS_05480	Brevundimonas phage vB_BpoS-Bambus	45
A0A9E7SJE9	A0A9E7SJE9_9CAUD	Ribosome modulation factor	KABACHOK_05200	Brevundimonas phage vB_BpoS-Kabachok	45
A0A9E7STQ7	A0A9E7STQ7_9CAUD	Ribosome modulation factor	MARCHEWKA_00990	Brevundimonas phage vB_BpoS-Marchewka	45
A0A9E7MST9	A0A9E7MST9_9CAUD	Ribosome modulation factor	PAPPERLAPAPP_00970	Brevundimonas phage vB_BpoS-Papperlapapp	45
A0A6P2NUR0	A0A6P2NUR0_9BURK	Ribosome modulation factor	rmf BLA13014_04600	Burkholderia aenigmatica	110
A0A381C9P4	A0A381C9P4_9ENTR	Ribosome modulation factor (RMF)	rmf NCTC12119_03108	Buttiauxella agrestis	55
A0A085GGW3	A0A085GGW3_9ENTR	Ribosome modulation factor (RMF)	rmf GBAG_1331	Buttiauxella agrestis ATCC 33320	55
A0A3A5JPH4	A0A3A5JPH4_9ENTR	Ribosome modulation factor (RMF)	rmf D6029_13105	Buttiauxella izardii	55
A0A3N5D3A3	A0A3N5D3A3_9ENTR	Ribosome modulation factor (RMF)	rmf EHN07_17865	Buttiauxella warmboldiae	55
A0A084XV11	A0A084XV11_9PROT	Ribosome modulation factor	CAPSK01_004466	Candidatus Accumulibacter vicinus	49
A0A0Q9YFM6	A0A0Q9YFM6_9COXI	Ribosome modulation factor	rmf HT99x_000125 HT99x_02761	Candidatus Berkiella aquae	61
A0A0Q9YN00	A0A0Q9YN00_9COXI	Ribosome modulation factor	rmf CC99x_000160 CC99x_01331	Candidatus Berkiella cookevillensis	63
A0AA90NYF2	A0AA90NYF2_9GAMM	Ribosome modulation factor (RMF)	rmf QS748_07305	Candidatus Endonucleobacter bathymodioli	70
A0A2A5T7C7	A0A2A5T7C7_9GAMM	Ribosome modulation factor (RMF)	rmf BTN49_0229	Candidatus Enterovibrio escacola	56
A0A291BBQ8	A0A291BBQ8_9GAMM	Ribosome modulation factor	BTN50_2028	Candidatus Enterovibrio luxaltus	38
A0A2U8I8U5	A0A2U8I8U5_9GAMM	Ribosome modulation factor (RMF)	rmf CCS41_08380	Candidatus Fukatsuia symbiotica	56
A0A9D1WMY6	A0A9D1WMY6_9GAMM	Ribosome modulation factor (RMF)	rmf H9854_02225	Candidatus Halomonas stercoripullorum	68
A0AAJ6BB85	A0AAJ6BB85_9PSED	Ribosome modulation factor (RMF)	rmf P0Y58_21545	Candidatus Pseudomonas phytovorans	71
G2GZP0	G2GZP0_9ENTR	Ribosome modulation factor (RMF)	rmf Rin_00012670	Candidatus Regiella insecticola 5.15	55
W0HNF7	W0HNF7_9GAMM	Ribosome modulation factor (RMF)	rmf SOPEG_1617	Candidatus Sodalis pierantonius str. SOPE	54
W7QKI7	W7QKI7_9ALTE	Ribosome modulation factor (RMF)	rmf DS2_16594	Catenovulum agarivorans DS-2	58
A0A0J8GTV3	A0A0J8GTV3_9ALTE	Ribosome modulation factor (RMF)	rmf XM47_16180	Catenovulum maritimum	57
A0A067XRG2	A0A067XRG2_9CAUD	Ribosome modulation factor		Caulobacter phage Cr30	65
A0A447V4E8	A0A447V4E8_9ENTR	Ribosome modulation factor (RMF)	rmf NCTC11466_02992	Cedecea lapagei	55
A0A291E004	A0A291E004_9ENTR	Ribosome modulation factor (RMF)	rmf CO704_15410	Cedecea neteri	55
A0A4R1JA34	A0A4R1JA34_9GAMM	Ribosome modulation factor (RMF)	rmf EV690_2525	Celerinatantimonas diazotrophica	66
A0A266Q8X0	A0A266Q8X0_9GAMM	Ribosome modulation factor (RMF)	rmf CBP51_01765	Cellvibrio mixtus	74
A0A928V3Q7	A0A928V3Q7_9GAMM	Ribosome modulation factor (RMF)	rmf C4F51_08745	Cellvibrio polysaccharolyticus	74
A0A2N5ETY6	A0A2N5ETY6_9GAMM	Ribosome modulation factor (RMF)	rmf CYR34_02260	Chimaeribacter arupi	56
A0A2N5EH16	A0A2N5EH16_9GAMM	Ribosome modulation factor (RMF)	rmf CYR55_00510	Chimaeribacter californicus	56
A0A2N5EDI2	A0A2N5EDI2_9GAMM	Ribosome modulation factor (RMF)	rmf CYR32_00790	Chimaeribacter coloradensis	56
A0A4R2KWK6	A0A4R2KWK6_9GAMM	Ribosome modulation factor (RMF)	rmf EV688_10743	Chromatocurvus halotolerans	67
A0A285VJK5	A0A285VJK5_9GAMM	Ribosome modulation factor (RMF)	rmf SAMN05421509_10390	Chromohalobacter canadensis	68
A0A9X4K2I4	A0A9X4K2I4_9GAMM	Ribosome modulation factor (RMF)	rmf M1C61_10740	Chromohalobacter israelensis	68
A0A1Q8T885	A0A1Q8T885_9GAMM	Ribosome modulation factor (RMF)	rmf BTW10_17605	Chromohalobacter japonicus	68
A0A4R7NV39	A0A4R7NV39_9GAMM	Ribosome modulation factor (RMF)	rmf C8E00_101228	Chromohalobacter marismortui	68
A0A9X2X026	A0A9X2X026_9GAMM	Ribosome modulation factor (RMF)	rmf KZO87_01450	Chromohalobacter moromii	68
A0A2S4RXZ6	A0A2S4RXZ6_CITAM	Ribosome modulation factor (RMF)	rmf C3430_10170	Citrobacter amalonaticus	55
A0A4V1AA11	A0A4V1AA11_9ENTR	Ribosome modulation factor (RMF)	rmf E1B03_09870	Citrobacter arsenatis	55
A0A1R0G1N0	A0A1R0G1N0_CITBR	Ribosome modulation factor (RMF)	rmf BWD41_03870 BZK42_00270 ID160_03780	Citrobacter braakii	55
A0A7X1EFY4	A0A7X1EFY4_9ENTR	Ribosome modulation factor (RMF)	rmf H7I73_03450	Citrobacter cronae	55
A0A8H9NRW2	A0A8H9NRW2_9ENTR	Ribosome modulation factor (RMF)	rmf I8Y00_000538	Citrobacter farmeri	55
A0A1B2JW66	A0A1B2JW66_CITFR	Ribosome modulation factor (RMF)	rmf AI2602V1_3097 AI2935V1_3166 B9P89_06900 HV077_11415 HV101_16225 HV178_15555 HV183_08245 HV241_08080 HV271_15485 HVZ23_11895 HVZ46_07915 HXS83_16605 I9Y29_001533 JD894_00350 JDY29_20675 JDY35_17715 KV121_003603 KY227_002968 P7U51_000130 PF691_15340 PQQ21_003766 RYZ67_11230 SGX49_002292 SJ346_00745	Citrobacter freundii	55
A0A3E2KXT7	A0A3E2KXT7_9ENTR	Ribosome modulation factor (RMF)	rmf DZA29_00990	Citrobacter gillenii	55
A0A078LAP2	A0A078LAP2_CITKO	Ribosome modulation factor (RMF)	rmf BN1086_01970 EGS84_18185 KIU63_001115	Citrobacter koseri (Citrobacter diversus)	55
A0A6N6K6N4	A0A6N6K6N4_9ENTR	Ribosome modulation factor (RMF)	rmf DXF85_10245	Citrobacter pasteurii	55
A0A5A9CBL1	A0A5A9CBL1_9ENTR	Ribosome modulation factor (RMF)	rmf D3H66_14655 L2102_00290 L2106_05745 L2111_14570 N7618_05530 NFK62_16135 SJ300_00360	Citrobacter portucalensis	55
A0A482PIE4	A0A482PIE4_CITRO	Ribosome modulation factor (RMF)	rmf E2R62_01580	Citrobacter rodentium	55
A0A6L5E4H3	A0A6L5E4H3_9ENTR	Ribosome modulation factor (RMF)	rmf GBB84_00165	Citrobacter telavivensis	55
A0A5P2MG91	A0A5P2MG91_9ENTR	Ribosome modulation factor (RMF)	rmf GHA_04044 GTI95_07920	Citrobacter werkmanii	55
A0A9Q7ZRU2	A0A9Q7ZRU2_9ENTR	Ribosome modulation factor (RMF)	rmf NCTC8782_04567	Citrobacter youngae	55
D4BBR4	D4BBR4_9ENTR	Ribosome modulation factor (RMF)	rmf CIT292_07854	Citrobacter youngae ATCC 29220	55
A0AAP4X1I8	A0AAP4X1I8_9GAMM	Ribosome modulation factor	rmf Q4535_12585	Cobetia amphilecti	69
A0A558HFG8	A0A558HFG8_9GAMM	Ribosome modulation factor (RMF)	rmf FQP86_15875	Cobetia crustatorum	69
A0AAC9H9L6	A0AAC9H9L6_COBMA	Ribosome modulation factor (RMF)	rmf BFX80_03225	Cobetia marina (Deleya marina)	69
A0A1H7JJB4	A0A1H7JJB4_9GAMM	Ribosome modulation factor (RMF)	rmf SAMN05216262_102258	Colwellia chukchiensis	57
A0A5C6QH12	A0A5C6QH12_9GAMM	Ribosome modulation factor (RMF)	rmf ESZ36_11215	Colwellia demingiae	57
A0A5C6QUP8	A0A5C6QUP8_9GAMM	Ribosome modulation factor (RMF)	rmf ESZ27_00920	Colwellia hornerae	58
A0A1Z5I751	A0A1Z5I751_9GAMM	Ribosome modulation factor (RMF)	rmf MTCD1_03235	Colwellia marinimaniae	58
A0A099KPN0	A0A099KPN0_COLPS	Ribosome modulation factor	ND2E_3028	Colwellia psychrerythraea (Vibrio psychroerythus)	75
A4A7X7	A4A7X7_9GAMM	Ribosome modulation factor (RMF)	rmf KT71_14419	Congregibacter litoralis KT71	67
A0A368NQV2	A0A368NQV2_9GAMM	Ribosome modulation factor (RMF)	rmf DU002_01535	Corallincola holothuriorum	58
A0A9Q4T8N1	A0A9Q4T8N1_9ENTR	Ribosome modulation factor (RMF)	rmf EHJ13_18485	Cronobacter dublinensis	55
A0A423Y2Z0	A0A423Y2Z0_9ENTR	Ribosome modulation factor (RMF)	rmf C3E80_03220	Cronobacter malonaticus	55
A0A2T7AMM6	A0A2T7AMM6_9ENTR	Ribosome modulation factor (RMF)	rmf AUN14_17955	Cronobacter muytjensii	55
A0AA49EIH0	A0AA49EIH0_9CAUD	Ribosome modulation factor		Cronobacter phage vB_Cdu_VP8	54
A0A2S9UDK5	A0A2S9UDK5_CROSK	Ribosome modulation factor (RMF)	rmf B7T07_12035 FZI38_04730 HRR37_17920	Cronobacter sakazakii (Enterobacter sakazakii)	55
A0A2T7B3N3	A0A2T7B3N3_9ENTR	Ribosome modulation factor (RMF)	rmf BS411_13640	Cronobacter turicensis	55
A0A7W4V7S2	A0A7W4V7S2_9BURK	Ribosome modulation factor	FHX61_000624	Cupriavidus alkaliphilus	218
A0A9J6RLR6	A0A9J6RLR6_9GAMM	Ribosome modulation factor (RMF)	rmf O0V09_08930	Dasania phycosphaerae	67
A0A0F7ING3	A0A0F7ING3_9CAUD	Ribosome modulation factor		Delftia phage IME-DE1	60
A0AAE9VM79	A0AAE9VM79_9GAMM	Ribosome modulation factor (RMF)	rmf O6P33_08720	Denitrificimonas caeni	71
A0AAP2G9U6	A0AAP2G9U6_9GAMM	Ribosome modulation factor	rmf F6X43_09570 IAF05_12725 JRZ89_13050	Dickeya dianthicola	55
A0A2K8QN24	A0A2K8QN24_9GAMM	Ribosome modulation factor (RMF)	rmf CVE23_13560	Dickeya fangzhongdai	55
A0A5B8HKS0	A0A5B8HKS0_9GAMM	Ribosome modulation factor (RMF)	rmf Dpoa569_0001580	Dickeya poaceiphila	55
A0AAP1TMP1	A0AAP1TMP1_9GAMM	Ribosome modulation factor	rmf FGLHLNJM_01633 HAT90_03461 I2625_08655 O0557_11675	Dickeya solani	55
A0A3N0G5W8	A0A3N0G5W8_9GAMM	Ribosome modulation factor (RMF)	rmf EF878_06230	Dickeya undicola	55
A0A2K9QGR1	A0A2K9QGR1_9GAMM	Ribosome modulation factor (RMF)	rmf DWG24_08650	Dickeya zeae	55
A0A9X2W5V2	A0A9X2W5V2_9ENTR	Ribosome modulation factor (RMF)	rmf MUA00_04915	Dryocola boscaweniae	55
A0AA42B934	A0AA42B934_9GAMM	Ribosome modulation factor (RMF)	rmf NAF29_16115	Echinimonas agarilytica	57
A0A376DIV5	A0A376DIV5_9GAMM	Ribosome modulation factor (RMF)	rmf NCTC12121_02257	Edwardsiella hoshinae	57
A0AAQ3C2P7	A0AAQ3C2P7_EDWPI	Ribosome modulation factor	rmf PWJ79_06195	Edwardsiella piscicida	57
A0A2A7U4C8	A0A2A7U4C8_EDWTA	Ribosome modulation factor (RMF)	rmf CRM76_15015	Edwardsiella tarda	57
A0A081NA12	A0A081NA12_9GAMM	Ribosome modulation factor (RMF)	rmf GZ77_01050	Endozoicomonas montiporae	70
A0A142BE66	A0A142BE66_9GAMM	Ribosome modulation factor (RMF)	rmf EZMO1_3007	Endozoicomonas montiporae CL-33	71
A0A081N438	A0A081N438_9GAMM	Ribosome modulation factor (RMF)	rmf GZ78_27155	Endozoicomonas numazuensis	70
A0A370QMP5	A0A370QMP5_9GAMM	Ribosome modulation factor (RMF)	rmf C8D90_107255	Enterobacillus tribolii	55
A0A6I6K5R2	A0A6I6K5R2_ENTAG	Ribosome modulation factor (RMF)	rmf GKC49_15000 IFU26_10650 LDO72_13035	Enterobacter agglomerans (Erwinia herbicola) (Pantoea agglomerans)	55
A0A0F0QZ26	A0A0F0QZ26_ENTAS	Ribosome modulation factor (RMF)	rmf DN555_18135 G9454_07605 HV056_12685 JGT27_07080 KZX48_08375 RZP48_11540	Enterobacter asburiae	55
A0AA42THW3	A0AA42THW3_9ENTR	Ribosome modulation factor (RMF)	rmf N5C39_02315	Enterobacter bugandensis	55
A0AA96RVI5	A0AA96RVI5_9ENTR	Ribosome modulation factor (RMF)	rmf RQP59_08000	Enterobacter chuandaensis	55
A0A176X8X3	A0A176X8X3_ENTCL	Ribosome modulation factor (RMF)	rmf HWQ14_19530	Enterobacter cloacae	55
A0A0X4EVP6	A0A0X4EVP6_9ENTR	Ribosome modulation factor (RMF)	rmf AWI28_10290	Enterobacter genomosp. O	55
[truncated: 992 more rows]

## Sheet: HPF family for operon analyses
A0A2S8SW15_9BACT	Ribosome hibernation promoting factor	1.10E-12	Abditibacteriota	Abditibacterium utsteinense	216
[truncated: 4,003 more rows]

## Sheet: Sra for operon analyses
Pasteurella	Reviewed	Entry Name	Protein names	Gene Names	Organism	Length
[truncated: 33 more rows]

[truncated: 2 more sheets: YqjD familiy for operon analyse, HPF family in proteobacteria]
